# Supplementary material for: Comparative Genomics of Staphylococcus rostri, an Undescribed Bacterium Isolated from Dairy Mastitis
Source: MDPI journal article supplement (doi:10.3390/vetsci10090530), 2023-08-22

**Figure S1:** Average Nucleotide Identity (%) of *S. rostri* isolates **a)** with three NAS reference strains: *S. microti* DSM22147 (NCBI assembly accession GCA002902635), *S. rostri* DSM21968 (NCBI assembly accession GCF002902145), and *S. muscae* ATCC49910 (NCBI assembly accession GCF\_003019275), and **b)** solely with the *S. rostri* DSM21968 (NCBI assembly accession GCF002902145).

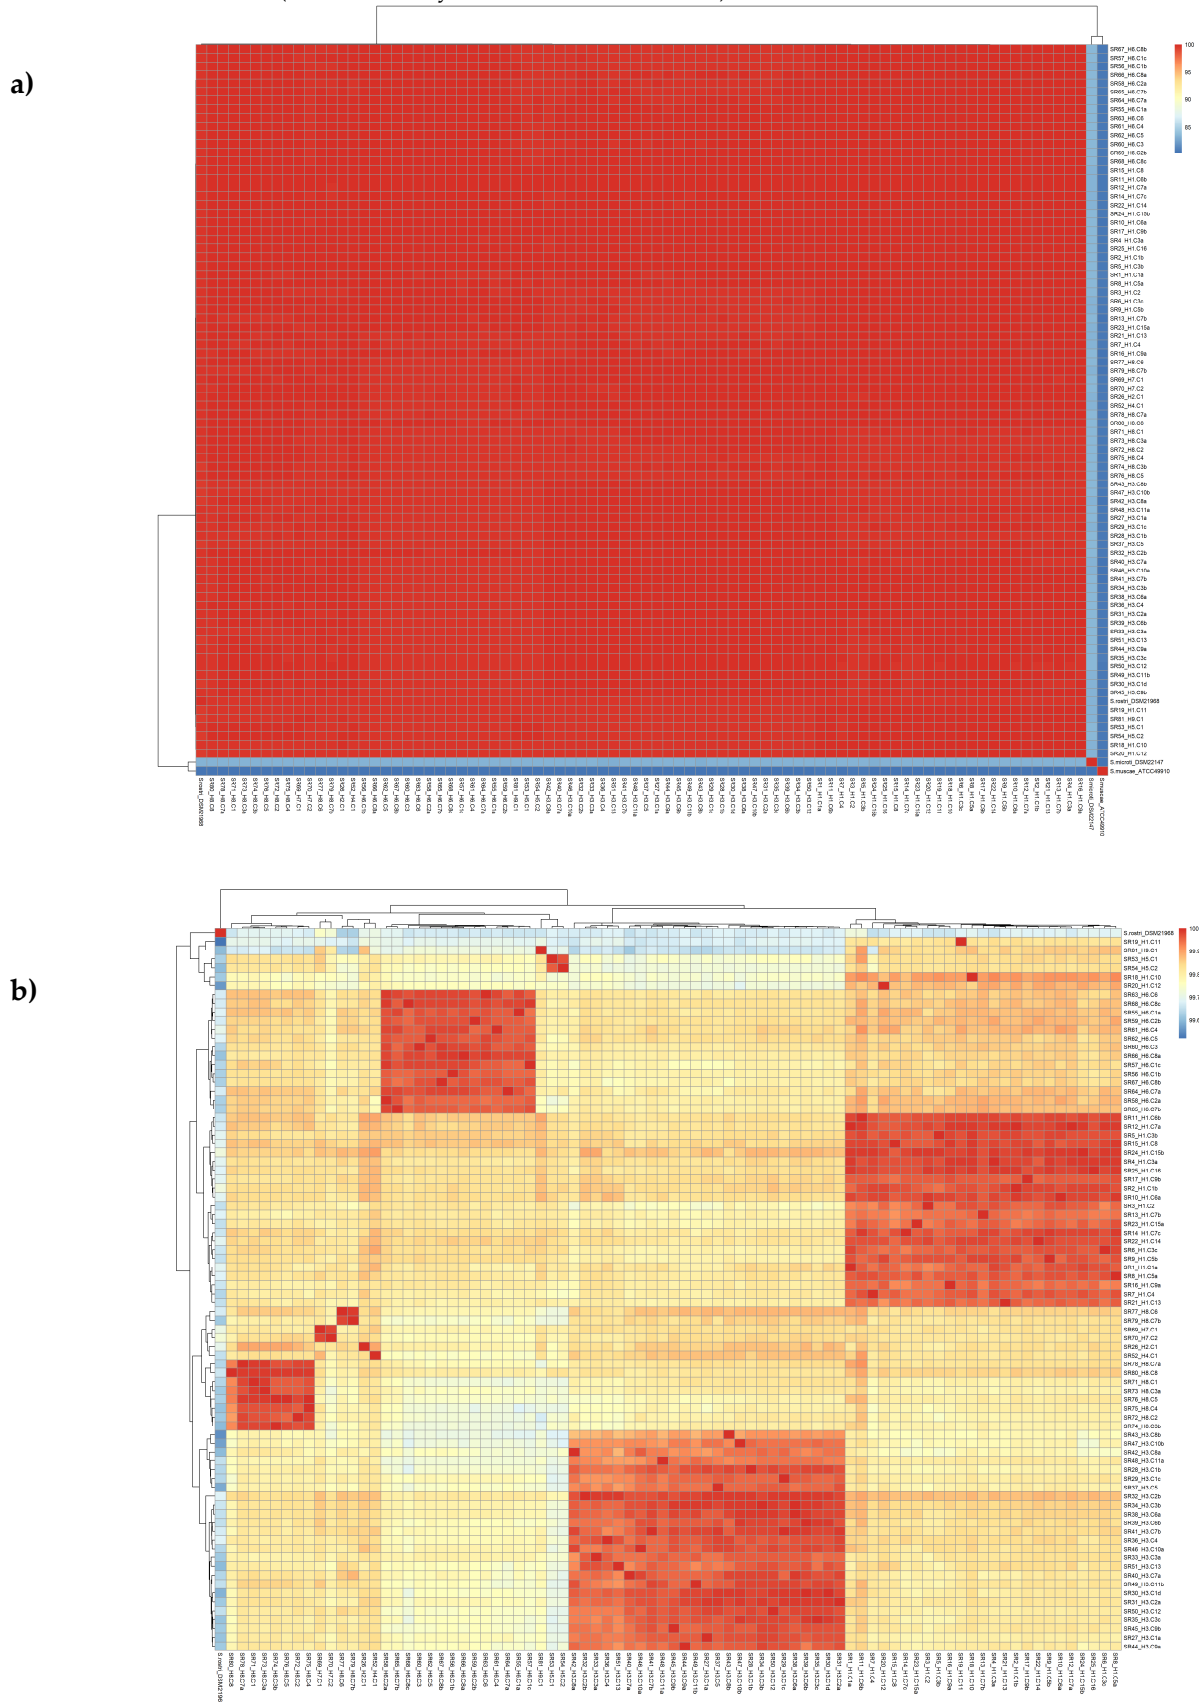

Supplement: s1 [file s1]
