# Supplementary material for: Comparative Genomics of Staphylococcus rostri, an Undescribed Bacterium Isolated from Dairy Mastitis
Source: MDPI journal article supplement (doi:10.3390/vetsci10090530), 2023-08-22
Supplement: s1 [file s1]

**Table S2.** Overview of *S. rostri* isolates from dairy cows with mastitis.

| Isolate designation | Collection Date | Gland* | Type of mastitis | Culture Type | n different species found in mixed culture | Finding A, B or C**                                            |
|---------------------|-----------------|--------|------------------|--------------|--------------------------------------------|----------------------------------------------------------------|
| SR1_H1C1a           | October 2019    | RR     | Persistent SCM   | Mixed        | 2                                          | <i>S. rostri</i> (A)<br><i>Streptococcus uberis</i> (B)        |
| SR2_H1C1b           | October 2019    | LR     | Persistent SCM   | Mixed        | 2                                          | <i>S. rostri</i> (A)<br><i>Staphylococcus muscae</i> (B)       |
| SR3_H1C2            | October 2019    | RF     | New SCM          | Mixed        | 2                                          | <i>S. rostri</i> (A)<br><i>Staphylococcus epidermidis</i> (B)  |
| SR4_H1C3a           | October 2019    | RF     | Persistent SCM   | Mixed        | 2                                          | <i>S. rostri</i> (A)<br><i>Staphylococcus epidermidis</i> (B)  |
| SR5_H1C3b           | October 2019    | LF     | Persistent SCM   | Mixed        | 2                                          | <i>Staphylococcus simulans</i> (A)<br><i>S. rostri</i> (B)     |
| SR6_H1C3c           | October 2019    | RR     | Persistent SCM   | Mixed        | 2                                          | <i>S. rostri</i> (A)<br><i>Corynebacterium amycolatum</i> (B)  |
| SR7_H1C4            | October 2019    | LR     | New SCM          | Mixed        | 2                                          | <i>Staphylococcus haemolyticus</i> (A)<br><i>S. rostri</i> (B) |
| SR8_H1C5a           | October 2019    | RF     | Persistent SCM   | Pure         | 1                                          |                                                                |
| SR9_H1C5b           | October 2019    | LF     | Persistent SCM   | Mixed        | 2                                          | <i>Staphylococcus simulans</i> (A)<br><i>S. rostri</i> (B)     |
| SR10_H1C6a          | October 2019    | RR     | Persistent SCM   | Mixed        | 2                                          | <i>S. rostri</i> (A)<br><i>Staphylococcus haemolyticus</i> (B) |
| SR11_H1C6b          | October 2019    | LR     | Persistent SCM   | Mixed        | 2                                          | <i>S. rostri</i> (A)<br><i>Lactococcus garvieae</i> (B)        |
| SR12_H1C7a          | October 2019    | RF     | New SCM          | Mixed        | 2                                          | <i>Staphylococcus haemolyticus</i> (A)<br><i>S. rostri</i> (B) |
| SR13_H1C7b          | October 2019    | RR     | New SCM          | Mixed        | 2                                          | <i>Staphylococcus simulans</i> (A)<br><i>S. rostri</i> (B)     |

|             |              |    |                |       |   |                                                                |
|-------------|--------------|----|----------------|-------|---|----------------------------------------------------------------|
| SR14_H1C7c  | October 2019 | LR | New SCM        | Mixed | 2 | <i>Staphylococcus simulans</i> (A)<br><i>S. rostri</i> (B)     |
| SR15_H1C8   | October 2019 | RR | New SCM        | Pure  | 1 |                                                                |
| SR16_H1C9a  | October 2019 | LF | Persistent SCM | Mixed | 2 | <i>Staphylococcus simulans</i> (A)<br><i>S. rostri</i> (B)     |
| SR17_H1C9b  | October 2019 | LR | Persistent SCM | Mixed | 2 | <i>Staphylococcus haemolyticus</i> (A)<br><i>S. rostri</i> (B) |
| SR18_H1C10  | October 2019 | LF | New SCM        | Pure  | 1 |                                                                |
| SR19_H1C11  | October 2019 | RR | New SCM        | Pure  | 1 |                                                                |
| SR20_H1C12  | October 2019 | LR | New SCM        | Mixed | 2 | <i>Staphylococcus simulans</i> (A)<br><i>S. rostri</i> (B)     |
| SR21_H1C13  | October 2019 | LF | New SCM        | Mixed | 2 | <i>S. rostri</i> (A)<br><i>Aerococcus viridans</i> (B)         |
| SR22_H1C14  | October 2019 | RF | Persistent SCM | Mixed | 2 | <i>Staphylococcus simulans</i> (A)<br><i>S. rostri</i> (B)     |
| SR23_H1C15a | October 2019 | RR | Persistent SCM | Mixed | 2 | <i>Lactococcus garvieae</i> (A)<br><i>S. rostri</i> (B)        |
| SR24_H1C15b | October 2019 | LR | Persistent SCM | Pure  | 1 |                                                                |
| SR25_H1C16  | October 2019 | RF | New SCM        | Mixed | 2 | <i>S. rostri</i> (A)<br><i>Corynebacterium amycolatum</i> (B)  |
| SR26_H2C1   | January 2020 | LR | Persistent SCM | Mixed | 2 | <i>S. rostri</i> (A)<br><i>Corynebacterium amycolatum</i> (B)  |
| SR27_H3C1a  | January 2020 | RF | New SCM        | Mixed | 2 | <i>S. rostri</i> (A)<br><i>Enterococcus faecalis</i> (B)       |
| SR28_H3C1b  | January 2020 | LF | New SCM        | Mixed | 2 | <i>S. rostri</i> (A)<br><i>Escherichia coli</i> (B)            |
| SR29_H3C1c  | January 2020 | RR | New SCM        | Mixed | 2 | <i>Staphylococcus epidermidis</i> (A)<br><i>S. rostri</i> (B)  |
| SR30_H3C1d  | January      | LR | New            | Mixed | 2 | <i>S. rostri</i> (A)                                           |

|             |              |    |                |       |   |                                                                 |
|-------------|--------------|----|----------------|-------|---|-----------------------------------------------------------------|
|             | 2020         |    | SCM            |       |   | <i>Lactococcus garvieae</i> (B)                                 |
| SR31_H3C2a  | January 2020 | LF | Persistent SCM | Mixed | 2 | <i>S. rostri</i> (A)<br><i>Staphylococcus chromogenes</i> (B)   |
| SR32_H3C2b  | January 2020 | RR | Persistent SCM | Mixed | 2 | <i>S. rostri</i> (A)<br><i>Staphylococcus chromogenes</i> (B)   |
| SR33_H3C3a  | January 2020 | RF | Persistent SCM | Mixed | 2 | <i>S. rostri</i> (A)<br><i>Staphylococcus epidermidis</i> (B)   |
| SR34_H3C3b  | January 2020 | LF | Persistent SCM | Mixed | 2 | <i>Staphylococcus simulans</i> (A)<br><i>S. rostri</i> (B)      |
| SR35_H3C3c  | January 2020 | RR | Persistent SCM | Mixed | 2 | <i>Staphylococcus epidermidis</i> (A)<br><i>S. rostri</i> (B)   |
| SR36_H3C4   | January 2020 | RR | Persistent SCM | Mixed | 2 | <i>Staphylococcus epidermidis</i> (A)<br><i>S. rostri</i> (B)   |
| SR37_H3C5   | January 2020 | LF | Persistent SCM | Mixed | 2 | <i>Staphylococcus chromogenes</i> (A)<br><i>S. rostri</i> (B)   |
| SR38_H3C6a  | January 2020 | LF | New SCM        | Mixed | 2 | <i>S. rostri</i> (NA)<br><i>Staphylococcus simulans</i> (NA)    |
| SR39_H3C6b  | January 2020 | LR | New SCM        | Mixed | 2 | <i>S. rostri</i> (NA)<br><i>Staphylococcus simulans</i> (NA)    |
| SR40_H3C7a  | January 2020 | RF | New SCM        | Pure  | 1 |                                                                 |
| SR41_H3C7b  | January 2020 | RR | New SCM        | Mixed | 2 | <i>S. rostri</i> (NA)<br><i>Aerococcus viridans</i> (NA)        |
| SR42_H3C8a  | January 2020 | LF | New SCM        | Pure  | 1 |                                                                 |
| SR43_H3C8b  | January 2020 | RR | New SCM        | Mixed | 2 | <i>S. rostri</i> (NA)<br><i>Staphylococcus epidermidis</i> (NA) |
| SR44_H3C9a  | January 2020 | RF | Persistent SCM | Mixed | 2 | <i>S. rostri</i> (NA)<br><i>Lactococcus garvieae</i> (NA)       |
| SR45_H3C9b  | January 2020 | LF | Persistent SCM | Mixed | 2 | <i>S. rostri</i> (A)<br><i>Staphylococcus simulans</i> (B)      |
| SR46_H3C10a | January 2020 | RF | New SCM        | Pure  | 1 |                                                                 |

|             |               |    |                |       |   |                                                                  |
|-------------|---------------|----|----------------|-------|---|------------------------------------------------------------------|
| SR47_H3C10b | January 2020  | RR | New SCM        | Pure  | 1 |                                                                  |
| SR48_H3C11a | January 2020  | RF | New SCM        | Mixed | 2 | <i>S. rostri</i> (NA)<br><i>Staphylococcus haemolyticus</i> (NA) |
| SR49_H3C11b | January 2020  | LF | New SCM        | Pure  | 1 |                                                                  |
| SR50_H3C12  | January 2020  | RF | New SCM        | Mixed | 2 | <i>S. rostri</i> (NA)<br><i>Staphylococcus haemolyticus</i> (NA) |
| SR51_H3C13  | January 2020  | LR | Persistent SCM | Pure  | 1 |                                                                  |
| SR52_H4C1   | January 2020  | LF | Persistent SCM | Mixed | 2 | <i>S. rostri</i> (NA)<br><i>Staphylococcus epidermidis</i> (NA)  |
| SR53_H5C1   | January 2020  | RR | Persistent SCM | Pure  | 1 |                                                                  |
| SR54_H5C2   | January 2020  | RR | New SCM        | Pure  | 1 |                                                                  |
| SR55_H6C1a  | February 2020 | RF | New SCM        | Mixed | 2 | <i>No ID</i> (A), <i>S. rostri</i> (B)                           |
| SR56_H6C1b  | February 2020 | RR | New SCM        | Pure  | 1 |                                                                  |
| SR57_H6C1c  | February 2020 | LR | New SCM        | Pure  | 1 |                                                                  |
| SR58_H6C2a  | February 2020 | RF | Persistent SCM | Mixed | 2 | <i>S. rostri</i> (A)<br><i>Streptococcus gallolyticus</i> (B)    |
| SR59_H6C2b  | February 2020 | LF | Persistent SCM | Pure  | 1 |                                                                  |
| SR60_H6C3   | February 2020 | LF | Persistent SCM | Mixed | 2 | <i>Staphylococcus simulans</i> (A)<br><i>S. rostri</i> (B)       |
| SR61_H6C4   | February 2020 | LR | Persistent SCM | Pure  | 1 |                                                                  |
| SR62_H6C5   | February 2020 | LF | Persistent SCM | Mixed | 2 | <i>S. rostri</i> (A)<br><i>Staphylococcus simulans</i> (B)       |
| SR63_H6C6   | February      | RR | New            | Pure  | 1 |                                                                  |

|            |               |    |                |       |   |                                                                |
|------------|---------------|----|----------------|-------|---|----------------------------------------------------------------|
|            | 2020          |    | SCM            |       |   |                                                                |
| SR64_H6C7a | February 2020 | RF | New SCM        | Mixed | 2 | <i>S. rostri</i> (A)<br><i>Streptococcus gallolyticus</i> (B)  |
| SR65_H6C7b | February 2020 | RR | New SCM        | Mixed | 2 | <i>S. rostri</i> (A)<br><i>Staphylococcus simulans</i> (B)     |
| SR66_H6C8a | February 2020 | LR | Persistent SCM | Mixed | 2 | <i>Lactococcus lactis</i> (A)<br><i>S. rostri</i> (B)          |
| SR67_H6C8b | February 2020 | RF | Persistent SCM | Pure  | 1 |                                                                |
| SR68_H6C8c | February 2020 | RR | Persistent SCM | Mixed | 2 | <i>Citobacter koseri</i> (A)<br><i>S. rostri</i> (B)           |
| SR69_H7C1  | April 2020    | RF | Persistent SCM | Mixed | 2 | <i>S. rostri</i> (A)<br><i>Kocuria rhizophila</i> (B)          |
| SR70_H7C2  | April 2020    | LR | Persistent SCM | Pure  | 1 |                                                                |
| SR71_H8C1  | May 2020      | RF | New SCM        | Mixed | 2 | <i>S. rostri</i> (A)<br><i>Corynebacterium amycolatum</i> (B)  |
| SR72_H8C2  | May 2020      | LR | Persistent SCM | Pure  | 1 |                                                                |
| SR73_H8C3a | May 2020      | RF | Persistent SCM | Mixed | 2 | <i>Streptococcus canis</i> (A)<br><i>S. rostri</i> (B)         |
| SR74_H8C3b | May 2020      | LF | Persistent SCM | Mixed | 2 | <i>S. rostri</i> (A)<br><i>Aerococcus viridans</i> (B)         |
| SR75_H8C4  | May 2020      | RF | Persistent SCM | Mixed | 2 | <i>S. rostri</i> (A)<br><i>Staphylococcus haemolyticus</i> (B) |
| SR76_H8C5  | May 2020      | RF | New SCM        | Mixed | 2 | <i>Staphylococcus epidermidis</i> (A)<br><i>S. rostri</i> (B)  |
| SR77_H8C6  | May 2020      | RR | Persistent SCM | Pure  | 1 |                                                                |
| SR78_H8C7a | May 2020      | LF | Persistent SCM | Mixed | 2 | <i>Corynebacterium amycolatum</i> (A)<br><i>S. rostri</i> (B)  |
| SR79_H8C7b | May 2020      | RR | Persistent SCM | Mixed | 2 | <i>S. rostri</i> (A)<br><i>Corynebacterium amycolatum</i> (B)  |

|           |                  |    |                   |      |   |  |
|-----------|------------------|----|-------------------|------|---|--|
| SR80_H8C8 | May<br>2020      | LR | Persistent<br>SCM | Pure | 1 |  |
| SR81_H9C1 | November<br>2019 | NA | CM                | Pure | 1 |  |

Gland\*: Right front (RF), left front (LF), right rear (RR), and left rear (LR). Finding A, B, or C\*\*: visual quantity of colonies grown on blood agar in mixed cultures; A=more, C=less. Not available (NA) is stated when even distribution of different species was found in the mixed cultures.
