# Supplementary material for: Comparative Genomics of Staphylococcus rostri, an Undescribed Bacterium Isolated from Dairy Mastitis
Source: MDPI journal article supplement (doi:10.3390/vetsci10090530), 2023-08-22

**Figure S2:** Core genome phylogeny of 94 *S. rostri* isolates. The tree includes the 81 study *S. rostri* isolates, the *S. rostri* DSM21968 reference strain, and 12 extra *S. rostri* isolates (SR\_extra1-11, red font)- The extra *S. rostri* isolates were found in mixed culture with >1 other bacterial species and thereby excluded from the overall study as contaminated. The tree was re-rooted from the reference strain.

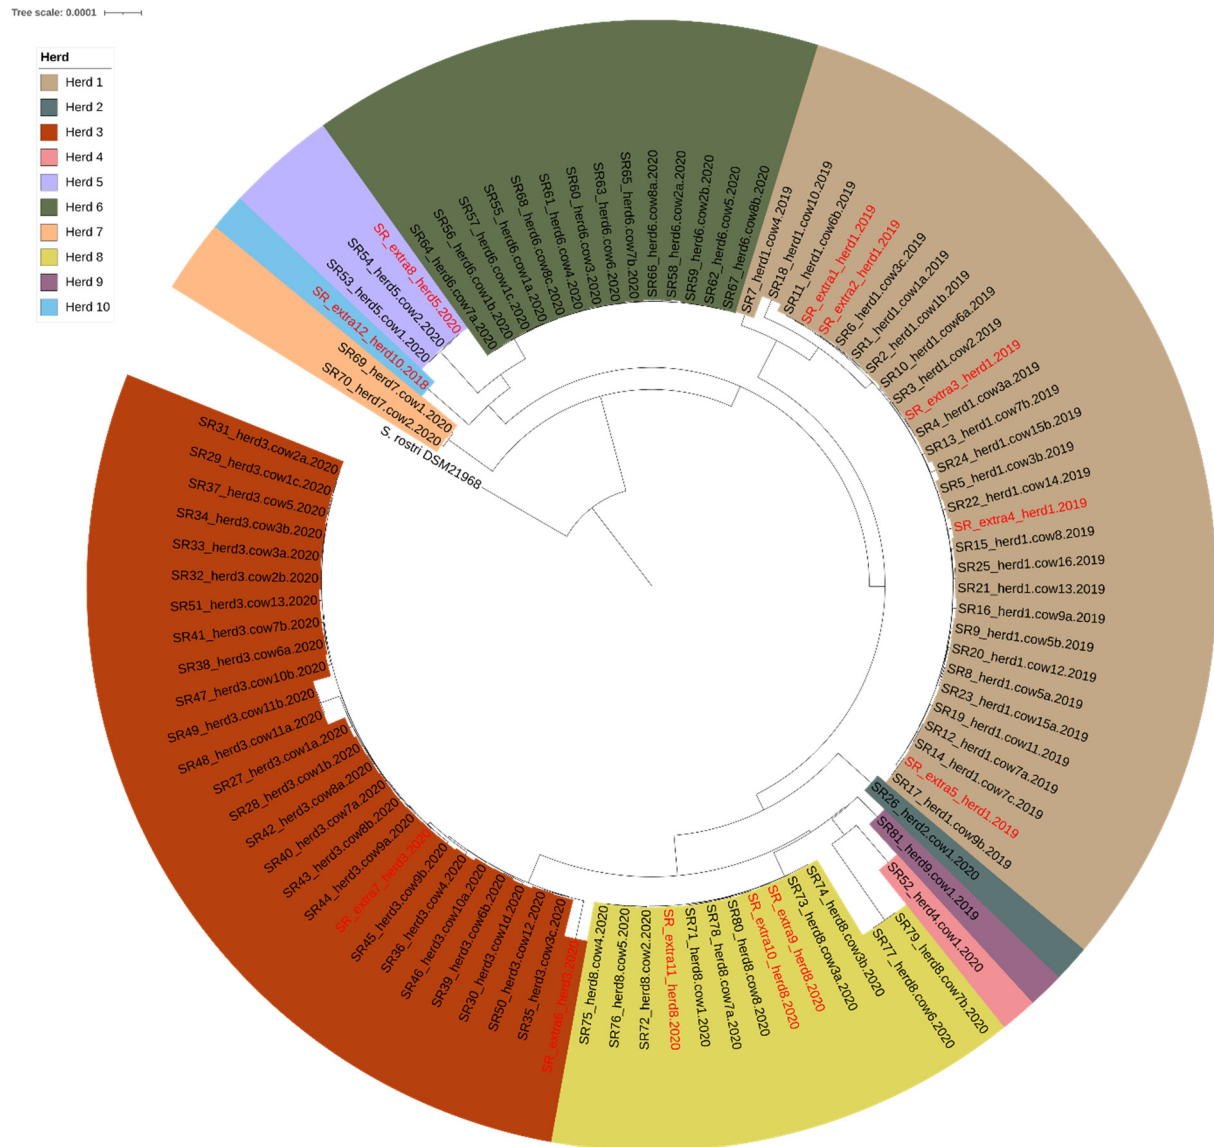

Supplement: s1 [file s1]
