# Supplementary material for: Comparative Genomics of Staphylococcus rostri, an Undescribed Bacterium Isolated from Dairy Mastitis
Source: Vet Sci. 2023 Aug 22;10(9):530. doi: 10.3390/vetsci10090530 (PMC10534715; doi:10.3390/vetsci10090530)
Supplement: Supplementary file 1 [file vetsci-10-00530-s001.zip]

Archive with 6 entries (6 files):
- Figure S1 Average Nucleotide Identity of S. rostri isolates.pdf
- Figure S2 Core genome phylogeny of 93 S. rostri isolates.pdf
- Table S1 Assembly metrics of S. rostri isolates.xlsx
- Table S2 Overview of S. rostri isolates from dairy cows with mastitis.pdf
- Table S3 Query_pan_genome results.xlsx
- Table S4 Presence of virulence, resistance and plasmid genes.xlsx
