# Supplementary material for: Comparative Genomics of Staphylococcus rostri, an Undescribed Bacterium Isolated from Dairy Mastitis
Source: Vet Sci. 2023 Aug 22;10(9):530. doi: 10.3390/vetsci10090530 (PMC10534715; doi:10.3390/vetsci10090530)
Supplement: Supplementary file 1 [file vetsci-10-00530-s001.zip › Table S1 Assembly metrics of S. rostri isolates.xlsx]

## Sheet: Table S1
Table S1 Assembly metrics of S. rostri isolates
Isolates	Assembly size (Mb)	Number of contigs	GC%	N50 (Kb)
Average SR1-81	2.3	32	38.47	188.93
SR1_H1.C1a	2.19217	23	38.58	197.968
SR2_H1. C1b	2.26435	25	38.55	241.02
SR3_H1.C2	2.23458	26	38.54	200.178
SR4_H1.C3a	2.23766	25	38.53	232.502
SR5_H1.C3b	2.23849	23	38.54	241.268
SR6_H1.C3c	2.26602	26	38.56	200.382
SR7_H1.C4	2.30623	24	38.51	241.125
SR8_H1.C5a	2.26577	23	38.55	241.369
SR9_H1.C5b	2.26438	23	38.55	241.268
SR10_H1.C6a	2.26604	26	38.55	200.179
SR11_H1.C6b	2.22042	25	38.6	198.168
SR12_H1.C7a	2.26486	26	38.55	200.182
SR13_H1.C7b	2.26479	25	38.54	200.179
SR14_H1.C7c	2.26569	32	38.55	168.002
SR15_H1.C8	2.26519	26	38.55	200.179
SR16_H1.C9a	2.25739	37	38.55	241.368
SR17_H1.C9b	2.26489	26	38.55	241.369
SR18_H1.C10	2.2685	28	38.57	241.121
SR19_H1.C11	2.26536	27	38.56	241.268
SR20_H1.C12	2.26802	29	38.57	167.584
SR21_H1.C13	2.26639	24	38.55	241.268
SR22_H1.C14	2.26502	27	38.55	200.111
SR23_H1.C15a	2.26471	25	38.54	200.321
SR24_H1.C15b	2.30961	27	38.42	200.216
SR25_H1.C16	2.31152	27	38.42	241.253
SR26_H2.C1	2.27799	30	38.55	156.318
SR27_H3.C1a	2.33157	35	38.46	184.533
SR28_H3.C1b	2.33118	31	38.46	184.533
SR29_H3.C1c	2.33097	31	38.46	189.593
SR30_H3.C1d	2.33138	34	38.46	184.533
SR31_H3.C2a	2.33086	32	38.46	184.707
SR32_H3.C2b	2.29546	27	38.49	200.862
SR33_H3.C3a	2.29456	29	38.48	189.575
SR34_H3.C3b	2.33114	34	38.46	184.533
SR35_H3.C3c	2.33082	36	38.45	184.533
SR36_H3.C4	2.34207	30	38.37	200
SR37_H3.C5	2.33118	34	38.46	184.533
SR38_H3.C6a	2.3311	33	38.46	184.533
SR39_H3.C6b	2.33302	40	38.47	182.827
SR40_H3.C7a	2.33293	39	38.44	146.918
SR41_H3.C7b	2.33541	35	38.44	189.593
SR42_H3.C8a	2.37655	39	38.35	146.918
SR43_H3.C8b	2.38879	44	38.33	189.593
SR44_H3.C9a	2.34936	54	38.42	189.593
SR45_H3.C9b	2.33134	32	38.46	184.533
SR46_H3.C10a	2.33217	40	38.46	146.917
SR47_H3.C10b	2.34471	57	38.44	184.707
SR48_H3.C11a	2.33792	60	38.44	199.64
SR49_H3.C11b	2.33304	35	38.45	189.575
SR50_H3.C12	2.33066	36	38.45	184.533
SR51_H3.C13	2.34505	32	38.35	199.641
SR52_H4.C1	2.33074	37	38.48	147.131
SR53_H5.C1	2.30238	27	38.47	185.357
SR54_H5.C2	2.31007	30	38.46	185.346
SR55_H6.C1a	2.29605	28	38.39	176.024
SR56_H6.C1b	2.29667	30	38.39	173.934
SR57_H6.C1c	2.29575	28	38.39	176.024
SR58_H6.C2a	2.31442	34	38.37	176.024
SR59_H6.C2b	2.29526	28	38.39	176.124
SR60_H6.C3	2.29536	27	38.39	176.024
SR61_H6.C4	2.29671	25	38.4	176.024
SR62_H6.C5	2.29691	28	38.39	176.024
SR63_H6.C6	2.29655	27	38.4	176.024
SR64_H6.C7a	2.2968	29	38.39	176.124
SR65_H6.C7b	2.29393	32	38.45	176.124
SR66_H6.C8a	2.29576	28	38.39	176.024
SR67_H6.C8b	2.29554	28	38.39	176.024
SR68_H6.C8c	2.29449	27	38.39	176.024
SR69_H7.C1	2.21853	30	38.61	133.936
SR70_H7.C2	2.2593	33	38.57	142.525
SR71_H8.C1	2.32196	35	38.45	176.02
SR72_H8.C2	2.32257	36	38.45	165.214
SR73_H8.C3a	2.3225	35	38.45	176.02
SR74_H8.C3b	2.32096	35	38.44	163.081
SR75_H8.C4	2.32253	35	38.45	176.12
SR76_H8.C5	2.32792	40	38.43	163.081
SR77_H8.C6	2.33194	42	38.44	146.836
SR78_H8.C7a	2.32203	35	38.45	165.4
SR79_H8.C7b	2.33048	42	38.45	146.836
SR80_H8.C8	2.28759	21	38.47	199.774
SR81_H9.C1	2.3175	31	38.49	200.185
