# Supplementary material for: Comparative Genomics of Staphylococcus rostri, an Undescribed Bacterium Isolated from Dairy Mastitis
Source: Vet Sci. 2023 Aug 22;10(9):530. doi: 10.3390/vetsci10090530 (PMC10534715; doi:10.3390/vetsci10090530)
Supplement: Supplementary file 1 [file vetsci-10-00530-s001.zip › Table S3 Query_pan_genome results.xlsx]

## Sheet: Table S3 Overview
Table S3: Query_pan results
Table S3a: Genes unique for bovine S. rostri isolates (n=81)
Table S3b: Genes unique for S. rostri CM isolate (n=1)
Table S3c: Genes unique for S. rostri SCM isolates (n=80)
Table S3d: Genes unique for S. rostri new SCM isolates (n=35)
Table S3e: Genes unique for S. rostri persistent SCM isolates (n=45)
Table S3f: Genes unique for pure culture S. rostri isolates (n=24)
Table S3g: Genes unique for mixed culture S. rostri isolates (n=57)
Table S3h: Genes unique for S. rostri test isolates (n=81)
Table S3i: Genes unique for S. rostri contaminated isolates (n=12)

## Sheet: Table S3a
Table S3b: Genes unique for bovine S. rostri isolates (n=81). The isolates are marked in color:
Gene	Non-unique Gene name	Annotation	No. isolates	No. sequences	Avg sequences per isolate	Genome Fragment	Order within Fragment	Accessory Fragment	Accessory Order with Fragment	QC	Min group size nuc	Max group size nuc	Avg group size nuc	SR10_H1.C6a	SR11_H1.C6b	SR12_H1.C7a	SR13_H1.C7b	SR14_H1.C7c	SR15_H1.C8	SR16_H1.C9a	SR17_H1.C9b	SR18_H1.C10	SR19_H1.C11	SR1_H1.C1a	SR20_H1.C12	SR21_H1.C13	SR22_H1.C14	SR23_H1.C15a	SR24_H1.C15b	SR25_H1.C16	SR26_H2.C1	SR27_H3.C1a	SR28_H3.C1b	SR29_H3.C1c	SR2_H1.C1b	SR30_H3.C1d	SR31_H3.C2a	SR32_H3.C2b	SR33_H3.C3a	SR34_H3.C3b	SR35_H3.C3c	SR36_H3.C4	SR37_H3.C5	SR38_H3.C6a	SR39_H3.C6b	SR3_H1.C2	SR40_H3.C7a	SR41_H3.C7b	SR42_H3.C8a
arnC		Undecaprenyl-phosphate 4-deoxy-4-formamido-L-arabinose transferase	81	81	1	60	3	60	3		1454	2267	2246	SR10_H1.C6a_02067	SR11_H1.C6b_01972	SR12_H1.C7a_02043	SR13_H1.C7b_02045	SR14_H1.C7c_02045	SR15_H1.C8_02042	SR16_H1.C9a_02046	SR17_H1.C9b_02042	SR18_H1.C10_02044	SR19_H1.C11_02041	SR1_H1.C1a_01995	SR20_H1.C12_02077	SR21_H1.C13_02044	SR22_H1.C14_02070	SR23_H1.C15a_02071	SR24_H1.C15b_02094	SR25_H1.C16_02093	SR26_H2.C1_02076	SR27_H3.C1a_02155	SR28_H3.C1b_02123	SR29_H3.C1c_02151	SR2_H1.C1b_02047	SR30_H3.C1d_02090	SR31_H3.C2a_02154	SR32_H3.C2b_02008	SR33_H3.C3a_02107	SR34_H3.C3b_02153	SR35_H3.C3c_02058	SR36_H3.C4_02151	SR37_H3.C5_02124	SR38_H3.C6a_02152	SR39_H3.C6b_02152	SR3_H1.C2_02042	SR40_H3.C7a_02122	SR41_H3.C7b_02155	SR42_H3.C8a_02158
csoR		Copper-sensing transcriptional repressor CsoR	81	81	1	59	4	59	3		287	287	287	SR10_H1.C6a_01683	SR11_H1.C6b_01767	SR12_H1.C7a_01684	SR13_H1.C7b_01889	SR14_H1.C7c_01734	SR15_H1.C8_01838	SR16_H1.C9a_01883	SR17_H1.C9b_01838	SR18_H1.C10_01887	SR19_H1.C11_01838	SR1_H1.C1a_01770	SR20_H1.C12_01684	SR21_H1.C13_01888	SR22_H1.C14_01839	SR23_H1.C15a_01775	SR24_H1.C15b_01839	SR25_H1.C16_01838	SR26_H2.C1_01617	SR27_H3.C1a_01781	SR28_H3.C1b_01734	SR29_H3.C1c_01826	SR2_H1.C1b_01838	SR30_H3.C1d_01732	SR31_H3.C2a_01786	SR32_H3.C2b_01774	SR33_H3.C3a_01687	SR34_H3.C3b_01732	SR35_H3.C3c_01781	SR36_H3.C4_01780	SR37_H3.C5_01736	SR38_H3.C6a_01731	SR39_H3.C6b_01778	SR3_H1.C2_01838	SR40_H3.C7a_01726	SR41_H3.C7b_01776	SR42_H3.C8a_01727
group_139		Y-family DNA polymerase	81	81	1	69	157	69	182		869	1262	1257	SR10_H1.C6a_00380	SR11_H1.C6b_00380	SR12_H1.C7a_00149	SR13_H1.C7b_00150	SR14_H1.C7c_00380	SR15_H1.C8_00380	SR16_H1.C9a_00380	SR17_H1.C9b_00380	SR18_H1.C10_00380	SR19_H1.C11_00149	SR1_H1.C1a_00380	SR20_H1.C12_00380	SR21_H1.C13_00149	SR22_H1.C14_00149	SR23_H1.C15a_00380	SR24_H1.C15b_00149	SR25_H1.C16_00380	SR26_H2.C1_01083	SR27_H3.C1a_00568	SR28_H3.C1b_00568	SR29_H3.C1c_00551	SR2_H1.C1b_00380	SR30_H3.C1d_00567	SR31_H3.C2a_00569	SR32_H3.C2b_00549	SR33_H3.C3a_00569	SR34_H3.C3b_00548	SR35_H3.C3c_00549	SR36_H3.C4_00570	SR37_H3.C5_00549	SR38_H3.C6a_00567	SR39_H3.C6b_00548	SR3_H1.C2_00149	SR40_H3.C7a_00452	SR41_H3.C7b_00569	SR42_H3.C8a_00433
group_148		TIGR01212 family radical SAM protein	81	81	1	69	152	69	176		632	953	945	SR10_H1.C6a_00469	SR11_H1.C6b_00469	SR12_H1.C7a_00060	SR13_H1.C7b_00060	SR14_H1.C7c_00469	SR15_H1.C8_00469	SR16_H1.C9a_00471	SR17_H1.C9b_00469	SR18_H1.C10_00469	SR19_H1.C11_00060	SR1_H1.C1a_00469	SR20_H1.C12_00469	SR21_H1.C13_00060	SR22_H1.C14_00060	SR23_H1.C15a_00469	SR24_H1.C15b_00060	SR25_H1.C16_00469	SR26_H2.C1_00995	SR27_H3.C1a_00480	SR28_H3.C1b_00480	SR29_H3.C1c_00639	SR2_H1.C1b_00469	SR30_H3.C1d_00479	SR31_H3.C2a_00481	SR32_H3.C2b_00637	SR33_H3.C3a_00481	SR34_H3.C3b_00636	SR35_H3.C3c_00637	SR36_H3.C4_00481	SR37_H3.C5_00638	SR38_H3.C6a_00479	SR39_H3.C6b_00636	SR3_H1.C2_00060	SR40_H3.C7a_00364	SR41_H3.C7b_00481	SR42_H3.C8a_00521
group_160		amino acid ABC transporter permease	81	81	1	69	241	69	40		413	689	685	SR10_H1.C6a_00664	SR11_H1.C6b_00770	SR12_H1.C7a_00771	SR13_H1.C7b_00552	SR14_H1.C7c_00771	SR15_H1.C8_00771	SR16_H1.C9a_00773	SR17_H1.C9b_00665	SR18_H1.C10_00771	SR19_H1.C11_00771	SR1_H1.C1a_00771	SR20_H1.C12_00552	SR21_H1.C13_00771	SR22_H1.C14_00771	SR23_H1.C15a_00771	SR24_H1.C15b_00552	SR25_H1.C16_00771	SR26_H2.C1_01553	SR27_H3.C1a_00201	SR28_H3.C1b_00201	SR29_H3.C1c_00202	SR2_H1.C1b_00664	SR30_H3.C1d_00219	SR31_H3.C2a_00220	SR32_H3.C2b_00220	SR33_H3.C3a_00202	SR34_H3.C3b_00201	SR35_H3.C3c_00201	SR36_H3.C4_00221	SR37_H3.C5_00201	SR38_H3.C6a_00201	SR39_H3.C6b_00201	SR3_H1.C2_00552	SR40_H3.C7a_00220	SR41_H3.C7b_00201	SR42_H3.C8a_00086
group_189		ABC transporter ATP-binding protein	81	81	1	66	6	66	3		404	680	673	SR10_H1.C6a_01092	SR11_H1.C6b_00799	SR12_H1.C7a_00914	SR13_H1.C7b_01064	SR14_H1.C7c_00801	SR15_H1.C8_01061	SR16_H1.C9a_01566	SR17_H1.C9b_01356	SR18_H1.C10_01176	SR19_H1.C11_01176	SR1_H1.C1a_00980	SR20_H1.C12_00980	SR21_H1.C13_01357	SR22_H1.C14_01062	SR23_H1.C15a_01008	SR24_H1.C15b_01063	SR25_H1.C16_01176	SR26_H2.C1_00538	SR27_H3.C1a_00884	SR28_H3.C1b_00703	SR29_H3.C1c_01111	SR2_H1.C1b_01355	SR30_H3.C1d_00702	SR31_H3.C2a_00885	SR32_H3.C2b_01120	SR33_H3.C3a_01079	SR34_H3.C3b_00883	SR35_H3.C3c_00884	SR36_H3.C4_01305	SR37_H3.C5_00704	SR38_H3.C6a_00883	SR39_H3.C6b_00883	SR3_H1.C2_01244	SR40_H3.C7a_00587	SR41_H3.C7b_00928	SR42_H3.C8a_00587
group_200		hypothetical protein	81	81	1	68	33	68	12		1421	1751	1653	SR10_H1.C6a_01154	SR11_H1.C6b_01289	SR12_H1.C7a_01210	SR13_H1.C7b_01361	SR14_H1.C7c_01043	SR15_H1.C8_01303	SR16_H1.C9a_01269	SR17_H1.C9b_01418	SR18_H1.C10_01473	SR19_H1.C11_01473	SR1_H1.C1a_01291	SR20_H1.C12_01097	SR21_H1.C13_01474	SR22_H1.C14_01304	SR23_H1.C15a_00891	SR24_H1.C15b_01305	SR25_H1.C16_01417	SR26_H2.C1_01445	SR27_H3.C1a_01196	SR28_H3.C1b_01196	SR29_H3.C1c_00795	SR2_H1.C1b_01472	SR30_H3.C1d_01122	SR31_H3.C2a_01124	SR32_H3.C2b_00823	SR33_H3.C3a_01318	SR34_H3.C3b_01122	SR35_H3.C3c_01123	SR36_H3.C4_00826	SR37_H3.C5_01198	SR38_H3.C6a_01195	SR39_H3.C6b_01193	SR3_H1.C2_01359	SR40_H3.C7a_01004	SR41_H3.C7b_00825	SR42_H3.C8a_01004
group_281		hypothetical protein	81	81	1	60	2	60	2		1127	1337	1326	SR10_H1.C6a_02066	SR11_H1.C6b_01973	SR12_H1.C7a_02044	SR13_H1.C7b_02046	SR14_H1.C7c_02046	SR15_H1.C8_02043	SR16_H1.C9a_02047	SR17_H1.C9b_02043	SR18_H1.C10_02045	SR19_H1.C11_02042	SR1_H1.C1a_01994	SR20_H1.C12_02076	SR21_H1.C13_02045	SR22_H1.C14_02069	SR23_H1.C15a_02070	SR24_H1.C15b_02095	SR25_H1.C16_02094	SR26_H2.C1_02077	SR27_H3.C1a_02154	SR28_H3.C1b_02124	SR29_H3.C1c_02150	SR2_H1.C1b_02048	SR30_H3.C1d_02089	SR31_H3.C2a_02153	SR32_H3.C2b_02009	SR33_H3.C3a_02106	SR34_H3.C3b_02152	SR35_H3.C3c_02059	SR36_H3.C4_02150	SR37_H3.C5_02125	SR38_H3.C6a_02151	SR39_H3.C6b_02151	SR3_H1.C2_02043	SR40_H3.C7a_02121	SR41_H3.C7b_02154	SR42_H3.C8a_02159
group_369		hypothetical protein	81	81	1	65	10	65	7		932	1118	1113	SR10_H1.C6a_01347	SR11_H1.C6b_01426	SR12_H1.C7a_01337	SR13_H1.C7b_01488	SR14_H1.C7c_01225	SR15_H1.C8_01485	SR16_H1.C9a_01644	SR17_H1.C9b_01599	SR18_H1.C10_01611	SR19_H1.C11_01610	SR1_H1.C1a_01417	SR20_H1.C12_01234	SR21_H1.C13_01612	SR22_H1.C14_01486	SR23_H1.C15a_01266	SR24_H1.C15b_01485	SR25_H1.C16_01599	SR26_H2.C1_01699	SR27_H3.C1a_01697	SR28_H3.C1b_01698	SR29_H3.C1c_01742	SR2_H1.C1b_01610	SR30_H3.C1d_01696	SR31_H3.C2a_01702	SR32_H3.C2b_01690	SR33_H3.C3a_01651	SR34_H3.C3b_01639	SR35_H3.C3c_01697	SR36_H3.C4_01696	SR37_H3.C5_01700	SR38_H3.C6a_01638	SR39_H3.C6b_01637	SR3_H1.C2_01496	SR40_H3.C7a_01690	SR41_H3.C7b_01740	SR42_H3.C8a_01691
group_384		hypothetical protein	81	81	1	69	79	69	131		794	971	916	SR10_H1.C6a_01639	SR11_H1.C6b_01092	SR12_H1.C7a_01640	SR13_H1.C7b_00881	SR14_H1.C7c_01577	SR15_H1.C8_00880	SR16_H1.C9a_00996	SR17_H1.C9b_01083	SR18_H1.C10_00994	SR19_H1.C11_00993	SR1_H1.C1a_01073	SR20_H1.C12_01640	SR21_H1.C13_01084	SR22_H1.C14_00881	SR23_H1.C15a_01683	SR24_H1.C15b_00881	SR25_H1.C16_00994	SR26_H2.C1_00635	SR27_H3.C1a_01474	SR28_H3.C1b_01475	SR29_H3.C1c_01519	SR2_H1.C1b_00992	SR30_H3.C1d_01473	SR31_H3.C2a_01477	SR32_H3.C2b_01009	SR33_H3.C3a_00802	SR34_H3.C3b_01473	SR35_H3.C3c_01474	SR36_H3.C4_01012	SR37_H3.C5_01476	SR38_H3.C6a_01472	SR39_H3.C6b_01437	SR3_H1.C2_00881	SR40_H3.C7a_01320	SR41_H3.C7b_01517	SR42_H3.C8a_01320
group_483		helix-hairpin-helix domain-containing protein	81	81	1	69	160	69	190		665	665	665	SR10_H1.C6a_00194	SR11_H1.C6b_00194	SR12_H1.C7a_00335	SR13_H1.C7b_00336	SR14_H1.C7c_00194	SR15_H1.C8_00194	SR16_H1.C9a_00194	SR17_H1.C9b_00194	SR18_H1.C10_00194	SR19_H1.C11_00335	SR1_H1.C1a_00194	SR20_H1.C12_00194	SR21_H1.C13_00335	SR22_H1.C14_00335	SR23_H1.C15a_00194	SR24_H1.C15b_00335	SR25_H1.C16_00194	SR26_H2.C1_00158	SR27_H3.C1a_00949	SR28_H3.C1b_01010	SR29_H3.C1c_01237	SR2_H1.C1b_00194	SR30_H3.C1d_01009	SR31_H3.C2a_00950	SR32_H3.C2b_01366	SR33_H3.C3a_01205	SR34_H3.C3b_00948	SR35_H3.C3c_01010	SR36_H3.C4_01431	SR37_H3.C5_00950	SR38_H3.C6a_00948	SR39_H3.C6b_01009	SR3_H1.C2_00335	SR40_H3.C7a_00833	SR41_H3.C7b_01174	SR42_H3.C8a_00894
group_485		NUDIX hydrolase	81	81	1	69	158	69	185		542	542	542	SR10_H1.C6a_00285	SR11_H1.C6b_00285	SR12_H1.C7a_00244	SR13_H1.C7b_00245	SR14_H1.C7c_00285	SR15_H1.C8_00285	SR16_H1.C9a_00285	SR17_H1.C9b_00285	SR18_H1.C10_00285	SR19_H1.C11_00244	SR1_H1.C1a_00285	SR20_H1.C12_00285	SR21_H1.C13_00244	SR22_H1.C14_00244	SR23_H1.C15a_00285	SR24_H1.C15b_00244	SR25_H1.C16_00285	SR26_H2.C1_00067	SR27_H3.C1a_00664	SR28_H3.C1b_00664	SR29_H3.C1c_00455	SR2_H1.C1b_00285	SR30_H3.C1d_00663	SR31_H3.C2a_00665	SR32_H3.C2b_00453	SR33_H3.C3a_00665	SR34_H3.C3b_00452	SR35_H3.C3c_00453	SR36_H3.C4_00666	SR37_H3.C5_00453	SR38_H3.C6a_00663	SR39_H3.C6b_00452	SR3_H1.C2_00244	SR40_H3.C7a_00548	SR41_H3.C7b_00665	SR42_H3.C8a_00337
group_489		MFS transporter	81	81	1	69	149	69	174		1193	1193	1193	SR10_H1.C6a_00500	SR11_H1.C6b_00500	SR12_H1.C7a_00029	SR13_H1.C7b_00029	SR14_H1.C7c_00500	SR15_H1.C8_00500	SR16_H1.C9a_00502	SR17_H1.C9b_00500	SR18_H1.C10_00500	SR19_H1.C11_00029	SR1_H1.C1a_00500	SR20_H1.C12_00500	SR21_H1.C13_00029	SR22_H1.C14_00029	SR23_H1.C15a_00500	SR24_H1.C15b_00029	SR25_H1.C16_00500	SR26_H2.C1_00964	SR27_H3.C1a_00449	SR28_H3.C1b_00449	SR29_H3.C1c_00670	SR2_H1.C1b_00500	SR30_H3.C1d_00448	SR31_H3.C2a_00450	SR32_H3.C2b_00668	SR33_H3.C3a_00450	SR34_H3.C3b_00667	SR35_H3.C3c_00668	SR36_H3.C4_00450	SR37_H3.C5_00669	SR38_H3.C6a_00448	SR39_H3.C6b_00667	SR3_H1.C2_00029	SR40_H3.C7a_00333	SR41_H3.C7b_00450	SR42_H3.C8a_00552
group_494		beta-class phenol-soluble modulin	81	81	1	66	13	66	9		131	131	131	SR10_H1.C6a_01003	SR11_H1.C6b_00887	SR12_H1.C7a_01003	SR13_H1.C7b_01153	SR14_H1.C7c_00890	SR15_H1.C8_01150	SR16_H1.C9a_01477	SR17_H1.C9b_01267	SR18_H1.C10_01265	SR19_H1.C11_01265	SR1_H1.C1a_00891	SR20_H1.C12_00891	SR21_H1.C13_01268	SR22_H1.C14_01151	SR23_H1.C15a_01097	SR24_H1.C15b_01152	SR25_H1.C16_01265	SR26_H2.C1_00449	SR27_H3.C1a_00795	SR28_H3.C1b_00792	SR29_H3.C1c_01022	SR2_H1.C1b_01266	SR30_H3.C1d_00791	SR31_H3.C2a_00796	SR32_H3.C2b_01209	SR33_H3.C3a_00990	SR34_H3.C3b_00794	SR35_H3.C3c_00795	SR36_H3.C4_01216	SR37_H3.C5_00793	SR38_H3.C6a_00794	SR39_H3.C6b_00794	SR3_H1.C2_01155	SR40_H3.C7a_00676	SR41_H3.C7b_01017	SR42_H3.C8a_00676
group_497		hypothetical protein	81	81	1	66	9	66	14		212	212	212	SR10_H1.C6a_01091	SR11_H1.C6b_00800	SR12_H1.C7a_00915	SR13_H1.C7b_01065	SR14_H1.C7c_00802	SR15_H1.C8_01062	SR16_H1.C9a_01565	SR17_H1.C9b_01355	SR18_H1.C10_01177	SR19_H1.C11_01177	SR1_H1.C1a_00979	SR20_H1.C12_00979	SR21_H1.C13_01356	SR22_H1.C14_01063	SR23_H1.C15a_01009	SR24_H1.C15b_01064	SR25_H1.C16_01177	SR26_H2.C1_00537	SR27_H3.C1a_00883	SR28_H3.C1b_00704	SR29_H3.C1c_01110	SR2_H1.C1b_01354	SR30_H3.C1d_00703	SR31_H3.C2a_00884	SR32_H3.C2b_01121	SR33_H3.C3a_01078	SR34_H3.C3b_00882	SR35_H3.C3c_00883	SR36_H3.C4_01304	SR37_H3.C5_00705	SR38_H3.C6a_00882	SR39_H3.C6b_00882	SR3_H1.C2_01243	SR40_H3.C7a_00588	SR41_H3.C7b_00929	SR42_H3.C8a_00588
group_515		hypothetical protein	81	81	1	68	20	68	32		848	848	848	SR10_H1.C6a_01139	SR11_H1.C6b_01304	SR12_H1.C7a_01225	SR13_H1.C7b_01376	SR14_H1.C7c_01028	SR15_H1.C8_01288	SR16_H1.C9a_01254	SR17_H1.C9b_01403	SR18_H1.C10_01488	SR19_H1.C11_01488	SR1_H1.C1a_01306	SR20_H1.C12_01112	SR21_H1.C13_01489	SR22_H1.C14_01289	SR23_H1.C15a_00876	SR24_H1.C15b_01290	SR25_H1.C16_01402	SR26_H2.C1_01430	SR27_H3.C1a_01211	SR28_H3.C1b_01211	SR29_H3.C1c_00780	SR2_H1.C1b_01487	SR30_H3.C1d_01107	SR31_H3.C2a_01109	SR32_H3.C2b_00838	SR33_H3.C3a_01303	SR34_H3.C3b_01107	SR35_H3.C3c_01108	SR36_H3.C4_00841	SR37_H3.C5_01213	SR38_H3.C6a_01210	SR39_H3.C6b_01208	SR3_H1.C2_01374	SR40_H3.C7a_00989	SR41_H3.C7b_00840	SR42_H3.C8a_00989
group_519		hypothetical protein	81	81	1	68	29	68	7		497	497	497	SR10_H1.C6a_01177	SR11_H1.C6b_01266	SR12_H1.C7a_01188	SR13_H1.C7b_01338	SR14_H1.C7c_01065	SR15_H1.C8_01326	SR16_H1.C9a_01292	SR17_H1.C9b_01441	SR18_H1.C10_01450	SR19_H1.C11_01450	SR1_H1.C1a_01268	SR20_H1.C12_01074	SR21_H1.C13_01451	SR22_H1.C14_01327	SR23_H1.C15a_00914	SR24_H1.C15b_01328	SR25_H1.C16_01440	SR26_H2.C1_01467	SR27_H3.C1a_01175	SR28_H3.C1b_01175	SR29_H3.C1c_00817	SR2_H1.C1b_01449	SR30_H3.C1d_01143	SR31_H3.C2a_01146	SR32_H3.C2b_00802	SR33_H3.C3a_01340	SR34_H3.C3b_01144	SR35_H3.C3c_01144	SR36_H3.C4_00805	SR37_H3.C5_01176	SR38_H3.C6a_01174	SR39_H3.C6b_01172	SR3_H1.C2_01336	SR40_H3.C7a_01025	SR41_H3.C7b_00804	SR42_H3.C8a_01025
group_527		heme-dependent peroxidase	81	81	1	65	4	65	8		758	758	758	SR10_H1.C6a_01331	SR11_H1.C6b_01410	SR12_H1.C7a_01353	SR13_H1.C7b_01504	SR14_H1.C7c_01241	SR15_H1.C8_01501	SR16_H1.C9a_01660	SR17_H1.C9b_01615	SR18_H1.C10_01595	SR19_H1.C11_01594	SR1_H1.C1a_01433	SR20_H1.C12_01218	SR21_H1.C13_01596	SR22_H1.C14_01502	SR23_H1.C15a_01282	SR24_H1.C15b_01501	SR25_H1.C16_01615	SR26_H2.C1_01775	SR27_H3.C1a_01898	SR28_H3.C1b_01807	SR29_H3.C1c_01942	SR2_H1.C1b_01594	SR30_H3.C1d_01805	SR31_H3.C2a_01811	SR32_H3.C2b_01799	SR33_H3.C3a_01760	SR34_H3.C3b_01805	SR35_H3.C3c_01806	SR36_H3.C4_01805	SR37_H3.C5_01809	SR38_H3.C6a_01895	SR39_H3.C6b_01803	SR3_H1.C2_01480	SR40_H3.C7a_01799	SR41_H3.C7b_01849	SR42_H3.C8a_01892
group_529		hypothetical protein	81	81	1	61	8	61	8		1208	1208	1208	SR10_H1.C6a_01480	SR11_H1.C6b_01569	SR12_H1.C7a_01492	SR13_H1.C7b_01643	SR14_H1.C7c_01380	SR15_H1.C8_01640	SR16_H1.C9a_01788	SR17_H1.C9b_01754	SR18_H1.C10_01744	SR19_H1.C11_01743	SR1_H1.C1a_01561	SR20_H1.C12_01378	SR21_H1.C13_01745	SR22_H1.C14_01641	SR23_H1.C15a_01421	SR24_H1.C15b_01629	SR25_H1.C16_01743	SR26_H2.C1_01329	SR27_H3.C1a_01313	SR28_H3.C1b_01323	SR29_H3.C1c_01367	SR2_H1.C1b_01743	SR30_H3.C1d_01321	SR31_H3.C2a_01315	SR32_H3.C2b_01557	SR33_H3.C3a_01518	SR34_H3.C3b_01322	SR35_H3.C3c_01322	SR36_H3.C4_01562	SR37_H3.C5_01315	SR38_H3.C6a_01311	SR39_H3.C6b_01319	SR3_H1.C2_01640	SR40_H3.C7a_01193	SR41_H3.C7b_01365	SR42_H3.C8a_01193
group_530		hypothetical protein	81	81	1	69	75	69	128		461	461	461	SR10_H1.C6a_01602	SR11_H1.C6b_01129	SR12_H1.C7a_01603	SR13_H1.C7b_00844	SR14_H1.C7c_01614	SR15_H1.C8_00843	SR16_H1.C9a_00959	SR17_H1.C9b_01120	SR18_H1.C10_00957	SR19_H1.C11_00956	SR1_H1.C1a_01036	SR20_H1.C12_01603	SR21_H1.C13_01121	SR22_H1.C14_00844	SR23_H1.C15a_01646	SR24_H1.C15b_00844	SR25_H1.C16_00957	SR26_H2.C1_00598	SR27_H3.C1a_01437	SR28_H3.C1b_01438	SR29_H3.C1c_01482	SR2_H1.C1b_00955	SR30_H3.C1d_01436	SR31_H3.C2a_01440	SR32_H3.C2b_00972	SR33_H3.C3a_00839	SR34_H3.C3b_01436	SR35_H3.C3c_01437	SR36_H3.C4_00975	SR37_H3.C5_01439	SR38_H3.C6a_01435	SR39_H3.C6b_01474	SR3_H1.C2_00844	SR40_H3.C7a_01357	SR41_H3.C7b_01480	SR42_H3.C8a_01357
group_533		IS200/IS605 family transposase ISEfa4	81	81	1	69	77	69	129		1142	1142	1142	SR10_H1.C6a_01637	SR11_H1.C6b_01094	SR12_H1.C7a_01638	SR13_H1.C7b_00879	SR14_H1.C7c_01579	SR15_H1.C8_00878	SR16_H1.C9a_00994	SR17_H1.C9b_01085	SR18_H1.C10_00992	SR19_H1.C11_00991	SR1_H1.C1a_01071	SR20_H1.C12_01638	SR21_H1.C13_01086	SR22_H1.C14_00879	SR23_H1.C15a_01681	SR24_H1.C15b_00879	SR25_H1.C16_00992	SR26_H2.C1_00633	SR27_H3.C1a_01472	SR28_H3.C1b_01473	SR29_H3.C1c_01517	SR2_H1.C1b_00990	SR30_H3.C1d_01471	SR31_H3.C2a_01475	SR32_H3.C2b_01007	SR33_H3.C3a_00804	SR34_H3.C3b_01471	SR35_H3.C3c_01472	SR36_H3.C4_01010	SR37_H3.C5_01474	SR38_H3.C6a_01470	SR39_H3.C6b_01439	SR3_H1.C2_00879	SR40_H3.C7a_01322	SR41_H3.C7b_01515	SR42_H3.C8a_01322
group_534		hypothetical protein	81	81	1	69	78	69	130		185	185	185	SR10_H1.C6a_01638	SR11_H1.C6b_01093	SR12_H1.C7a_01639	SR13_H1.C7b_00880	SR14_H1.C7c_01578	SR15_H1.C8_00879	SR16_H1.C9a_00995	SR17_H1.C9b_01084	SR18_H1.C10_00993	SR19_H1.C11_00992	SR1_H1.C1a_01072	SR20_H1.C12_01639	SR21_H1.C13_01085	SR22_H1.C14_00880	SR23_H1.C15a_01682	SR24_H1.C15b_00880	SR25_H1.C16_00993	SR26_H2.C1_00634	SR27_H3.C1a_01473	SR28_H3.C1b_01474	SR29_H3.C1c_01518	SR2_H1.C1b_00991	SR30_H3.C1d_01472	SR31_H3.C2a_01476	SR32_H3.C2b_01008	SR33_H3.C3a_00803	SR34_H3.C3b_01472	SR35_H3.C3c_01473	SR36_H3.C4_01011	SR37_H3.C5_01475	SR38_H3.C6a_01471	SR39_H3.C6b_01438	SR3_H1.C2_00880	SR40_H3.C7a_01321	SR41_H3.C7b_01516	SR42_H3.C8a_01321
group_535		hypothetical protein	81	81	1	69	127	69	132		218	218	218	SR10_H1.C6a_01654	SR11_H1.C6b_01077	SR12_H1.C7a_01655	SR13_H1.C7b_00896	SR14_H1.C7c_01562	SR15_H1.C8_00895	SR16_H1.C9a_01011	SR17_H1.C9b_01068	SR18_H1.C10_01009	SR19_H1.C11_01008	SR1_H1.C1a_01088	SR20_H1.C12_01655	SR21_H1.C13_01069	SR22_H1.C14_00896	SR23_H1.C15a_01698	SR24_H1.C15b_00896	SR25_H1.C16_01009	SR26_H2.C1_00650	SR27_H3.C1a_01489	SR28_H3.C1b_01490	SR29_H3.C1c_01534	SR2_H1.C1b_01007	SR30_H3.C1d_01488	SR31_H3.C2a_01492	SR32_H3.C2b_01024	SR33_H3.C3a_00787	SR34_H3.C3b_01488	SR35_H3.C3c_01489	SR36_H3.C4_01027	SR37_H3.C5_01491	SR38_H3.C6a_01487	SR39_H3.C6b_01422	SR3_H1.C2_00896	SR40_H3.C7a_01305	SR41_H3.C7b_01532	SR42_H3.C8a_01305
group_538		hypothetical protein	81	81	1	69	119	69	87		410	410	410	SR10_H1.C6a_01796	SR11_H1.C6b_01028	SR12_H1.C7a_01797	SR13_H1.C7b_01015	SR14_H1.C7c_01799	SR15_H1.C8_01012	SR16_H1.C9a_01130	SR17_H1.C9b_00950	SR18_H1.C10_01127	SR19_H1.C11_01127	SR1_H1.C1a_01138	SR20_H1.C12_01797	SR21_H1.C13_00950	SR22_H1.C14_01013	SR23_H1.C15a_01840	SR24_H1.C15b_01014	SR25_H1.C16_01127	SR26_H2.C1_02025	SR27_H3.C1a_01572	SR28_H3.C1b_01573	SR29_H3.C1c_01629	SR2_H1.C1b_01126	SR30_H3.C1d_01571	SR31_H3.C2a_01575	SR32_H3.C2b_01071	SR33_H3.C3a_00740	SR34_H3.C3b_01583	SR35_H3.C3c_01572	SR36_H3.C4_01075	SR37_H3.C5_01587	SR38_H3.C6a_01570	SR39_H3.C6b_01569	SR3_H1.C2_01015	SR40_H3.C7a_01577	SR41_H3.C7b_01627	SR42_H3.C8a_01578
group_539		hypothetical protein	81	81	1	69	120	69	89		662	662	662	SR10_H1.C6a_01815	SR11_H1.C6b_01047	SR12_H1.C7a_01816	SR13_H1.C7b_00996	SR14_H1.C7c_01818	SR15_H1.C8_00993	SR16_H1.C9a_01111	SR17_H1.C9b_00969	SR18_H1.C10_01108	SR19_H1.C11_01108	SR1_H1.C1a_01119	SR20_H1.C12_01817	SR21_H1.C13_00969	SR22_H1.C14_00994	SR23_H1.C15a_01860	SR24_H1.C15b_00995	SR25_H1.C16_01108	SR26_H2.C1_00741	SR27_H3.C1a_01591	SR28_H3.C1b_01592	SR29_H3.C1c_01610	SR2_H1.C1b_01107	SR30_H3.C1d_01590	SR31_H3.C2a_01594	SR32_H3.C2b_01052	SR33_H3.C3a_00759	SR34_H3.C3b_01564	SR35_H3.C3c_01591	SR36_H3.C4_01056	SR37_H3.C5_01568	SR38_H3.C6a_01589	SR39_H3.C6b_01588	SR3_H1.C2_00996	SR40_H3.C7a_01558	SR41_H3.C7b_01608	SR42_H3.C8a_01559
group_540		CHAP domain-containing protein	81	81	1	69	126	69	133		803	803	803	SR10_H1.C6a_01819	SR11_H1.C6b_01051	SR12_H1.C7a_01820	SR13_H1.C7b_00992	SR14_H1.C7c_01822	SR15_H1.C8_00989	SR16_H1.C9a_01107	SR17_H1.C9b_00973	SR18_H1.C10_01104	SR19_H1.C11_01104	SR1_H1.C1a_01115	SR20_H1.C12_01821	SR21_H1.C13_00973	SR22_H1.C14_00990	SR23_H1.C15a_01864	SR24_H1.C15b_00991	SR25_H1.C16_01104	SR26_H2.C1_00737	SR27_H3.C1a_01595	SR28_H3.C1b_01596	SR29_H3.C1c_01606	SR2_H1.C1b_01103	SR30_H3.C1d_01594	SR31_H3.C2a_01598	SR32_H3.C2b_01048	SR33_H3.C3a_00763	SR34_H3.C3b_01560	SR35_H3.C3c_01595	SR36_H3.C4_01052	SR37_H3.C5_01564	SR38_H3.C6a_01593	SR39_H3.C6b_01592	SR3_H1.C2_00992	SR40_H3.C7a_01554	SR41_H3.C7b_01604	SR42_H3.C8a_01555
deoC1_1		Deoxyribose-phosphate aldolase 1	80	80	1	69	268	69	36		662	662	662	SR10_H1.C6a_00577	SR11_H1.C6b_01696	SR12_H1.C7a_00859	SR13_H1.C7b_01770	SR14_H1.C7c_01490	SR15_H1.C8_01767	SR16_H1.C9a_00861	SR17_H1.C9b_00577	SR18_H1.C10_00859	SR19_H1.C11_00858	SR1_H1.C1a_01682	SR20_H1.C12_01505	SR21_H1.C13_00859	SR22_H1.C14_01768	SR23_H1.C15a_01548	SR24_H1.C15b_01768	SR25_H1.C16_00859	SR26_H2.C1_01150	SR27_H3.C1a_00114	SR28_H3.C1b_00114	SR29_H3.C1c_00115	SR2_H1.C1b_00577	SR30_H3.C1d_00306	SR31_H3.C2a_00307	SR32_H3.C2b_00307	SR33_H3.C3a_00114	SR34_H3.C3b_00114	SR35_H3.C3c_00114	SR36_H3.C4_00308	SR37_H3.C5_00114	SR38_H3.C6a_00114	SR39_H3.C6b_00114	SR3_H1.C2_01750	SR40_H3.C7a_01410	SR41_H3.C7b_00114	SR42_H3.C8a_01523
deoC1_2		Deoxyribose-phosphate aldolase 1	80	80	1	68	18	68	31		662	662	662	SR10_H1.C6a_01102	SR11_H1.C6b_01341	SR12_H1.C7a_01262	SR13_H1.C7b_01413	SR14_H1.C7c_00991	SR15_H1.C8_01251	SR16_H1.C9a_01217	SR17_H1.C9b_01366	SR18_H1.C10_01525	SR19_H1.C11_01525	SR1_H1.C1a_01343	SR20_H1.C12_01149	SR21_H1.C13_01526	SR22_H1.C14_01252	SR23_H1.C15a_00839	SR24_H1.C15b_01253	SR25_H1.C16_01365	SR26_H2.C1_01394	SR27_H3.C1a_01247	SR28_H3.C1b_01247	SR29_H3.C1c_00744	SR2_H1.C1b_01524	SR30_H3.C1d_01071	SR31_H3.C2a_01073	SR32_H3.C2b_00874	SR33_H3.C3a_01267	SR34_H3.C3b_01071	SR35_H3.C3c_01072	SR36_H3.C4_00877	SR37_H3.C5_01249	SR38_H3.C6a_01246	SR39_H3.C6b_01244	SR3_H1.C2_01411	SR40_H3.C7a_00953	SR41_H3.C7b_00876	SR42_H3.C8a_00953
group_518		hypothetical protein	79	79	1	68	30	68	9		230	230	230	SR10_H1.C6a_01173	SR11_H1.C6b_01270		SR13_H1.C7b_01342		SR15_H1.C8_01322	SR16_H1.C9a_01288	SR17_H1.C9b_01437	SR18_H1.C10_01454	SR19_H1.C11_01454	SR1_H1.C1a_01272	SR20_H1.C12_01078	SR21_H1.C13_01455	SR22_H1.C14_01323	SR23_H1.C15a_00910	SR24_H1.C15b_01324	SR25_H1.C16_01436	SR26_H2.C1_01463	SR27_H3.C1a_01179	SR28_H3.C1b_01179	SR29_H3.C1c_00812	SR2_H1.C1b_01453	SR30_H3.C1d_01139	SR31_H3.C2a_01141	SR32_H3.C2b_00806	SR33_H3.C3a_01335	SR34_H3.C3b_01139	SR35_H3.C3c_01140	SR36_H3.C4_00809	SR37_H3.C5_01181	SR38_H3.C6a_01178	SR39_H3.C6b_01176	SR3_H1.C2_01340	SR40_H3.C7a_01021	SR41_H3.C7b_00808	SR42_H3.C8a_01021
group_603		hypothetical protein	79	79	1	65	2	65	11		794	794	794	SR10_H1.C6a_02193	SR11_H1.C6b_02104	SR12_H1.C7a_02201	SR13_H1.C7b_02203	SR14_H1.C7c_02189	SR15_H1.C8_02192	SR16_H1.C9a_02165	SR17_H1.C9b_02167	SR18_H1.C10_02188	SR19_H1.C11_02159	SR1_H1.C1a_02069	SR20_H1.C12_02202	SR21_H1.C13_02202	SR22_H1.C14_02195	SR23_H1.C15a_02170	SR24_H1.C15b_02212	SR25_H1.C16_02211	SR26_H2.C1_01867	SR27_H3.C1a_01804	SR28_H3.C1b_01901	SR29_H3.C1c_01849	SR2_H1.C1b_02161	SR30_H3.C1d_01899	SR31_H3.C2a_01905	SR32_H3.C2b_01892	SR33_H3.C3a_01853	SR34_H3.C3b_01898	SR35_H3.C3c_01900	SR36_H3.C4_01899	SR37_H3.C5_01902	SR38_H3.C6a_01802	SR39_H3.C6b_01897	SR3_H1.C2_02168	SR40_H3.C7a_01892	SR41_H3.C7b_01942	SR42_H3.C8a_01798
deoB_1		Phosphopentomutase	77	77	1	69	269	69	37		1178	1178	1178	SR10_H1.C6a_00578	SR11_H1.C6b_01695	SR12_H1.C7a_00858	SR13_H1.C7b_01769	SR14_H1.C7c_01491	SR15_H1.C8_01766	SR16_H1.C9a_00860	SR17_H1.C9b_00578	SR18_H1.C10_00858	SR19_H1.C11_00857	SR1_H1.C1a_01683	SR20_H1.C12_01504	SR21_H1.C13_00858	SR22_H1.C14_01767	SR23_H1.C15a_01547	SR24_H1.C15b_01767	SR25_H1.C16_00858	SR26_H2.C1_01149	SR27_H3.C1a_00115	SR28_H3.C1b_00115	SR29_H3.C1c_00116	SR2_H1.C1b_00578	SR30_H3.C1d_00305	SR31_H3.C2a_00306	SR32_H3.C2b_00306	SR33_H3.C3a_00115	SR34_H3.C3b_00115	SR35_H3.C3c_00115	SR36_H3.C4_00307	SR37_H3.C5_00115	SR38_H3.C6a_00115	SR39_H3.C6b_00115	SR3_H1.C2_01751		SR41_H3.C7b_00115
group_262		hypothetical protein	77	77	1	69	257	69	24		851	1562	1472	SR10_H1.C6a_01955	SR11_H1.C6b_01918	SR12_H1.C7a_01989	SR13_H1.C7b_01958	SR14_H1.C7c_01958	SR15_H1.C8_01988	SR16_H1.C9a_01992	SR17_H1.C9b_01988	SR18_H1.C10_01990	SR19_H1.C11_01987	SR1_H1.C1a_01925	SR20_H1.C12_01990	SR21_H1.C13_01957	SR22_H1.C14_01989	SR23_H1.C15a_01957	SR24_H1.C15b_02040	SR25_H1.C16_02039		SR27_H3.C1a_00005	SR28_H3.C1b_00005	SR29_H3.C1c_00005	SR2_H1.C1b_01959	SR30_H3.C1d_00415	SR31_H3.C2a_00417	SR32_H3.C2b_00416	SR33_H3.C3a_00005	SR34_H3.C3b_00005	SR35_H3.C3c_00005	SR36_H3.C4_00417	SR37_H3.C5_00005	SR38_H3.C6a_00005	SR39_H3.C6b_00005	SR3_H1.C2_01955	SR40_H3.C7a_01519	SR41_H3.C7b_00005	SR42_H3.C8a_01414
lnrL		Linearmycin resistance ATP-binding protein LnrL	77	77	1	69	258	69	25		674	674	674	SR10_H1.C6a_01956	SR11_H1.C6b_01917	SR12_H1.C7a_01988	SR13_H1.C7b_01959	SR14_H1.C7c_01959	SR15_H1.C8_01987	SR16_H1.C9a_01991	SR17_H1.C9b_01987	SR18_H1.C10_01989	SR19_H1.C11_01986	SR1_H1.C1a_01924	SR20_H1.C12_01989	SR21_H1.C13_01958	SR22_H1.C14_01988	SR23_H1.C15a_01958	SR24_H1.C15b_02039	SR25_H1.C16_02038		SR27_H3.C1a_00006	SR28_H3.C1b_00006	SR29_H3.C1c_00006	SR2_H1.C1b_01960	SR30_H3.C1d_00414	SR31_H3.C2a_00416	SR32_H3.C2b_00415	SR33_H3.C3a_00006	SR34_H3.C3b_00006	SR35_H3.C3c_00006	SR36_H3.C4_00416	SR37_H3.C5_00006	SR38_H3.C6a_00006	SR39_H3.C6b_00006	SR3_H1.C2_01956	SR40_H3.C7a_01518	SR41_H3.C7b_00006	SR42_H3.C8a_01415
deoB_2		Phosphopentomutase	75	75	1	68	13	68	29		1178	1178	1178	SR10_H1.C6a_01101	SR11_H1.C6b_01342	SR12_H1.C7a_01263	SR13_H1.C7b_01414	SR14_H1.C7c_00990	SR15_H1.C8_01250	SR16_H1.C9a_01216	SR17_H1.C9b_01365	SR18_H1.C10_01526	SR19_H1.C11_01526	SR1_H1.C1a_01344	SR20_H1.C12_01150	SR21_H1.C13_01527	SR22_H1.C14_01251	SR23_H1.C15a_00838	SR24_H1.C15b_01252	SR25_H1.C16_01364	SR26_H2.C1_01393	SR27_H3.C1a_01248	SR28_H3.C1b_01248	SR29_H3.C1c_00743	SR2_H1.C1b_01525	SR30_H3.C1d_01070	SR31_H3.C2a_01072	SR32_H3.C2b_00875	SR33_H3.C3a_01266	SR34_H3.C3b_01070	SR35_H3.C3c_01071	SR36_H3.C4_00878	SR37_H3.C5_01250	SR38_H3.C6a_01247	SR39_H3.C6b_01245	SR3_H1.C2_01412		SR41_H3.C7b_00877
group_263		MFS transporter	75	75	1	69	265	69	27		839	1391	1354	SR10_H1.C6a_01960	SR11_H1.C6b_01913	SR12_H1.C7a_01984	SR13_H1.C7b_01963	SR14_H1.C7c_01963	SR15_H1.C8_01983	SR16_H1.C9a_01987	SR17_H1.C9b_01983	SR18_H1.C10_01985	SR19_H1.C11_01982	SR1_H1.C1a_01920	SR20_H1.C12_01985	SR21_H1.C13_01962	SR22_H1.C14_01984	SR23_H1.C15a_01962	SR24_H1.C15b_02035	SR25_H1.C16_02034		SR27_H3.C1a_00009	SR28_H3.C1b_00009	SR29_H3.C1c_00009	SR2_H1.C1b_01964	SR30_H3.C1d_00411	SR31_H3.C2a_00413	SR32_H3.C2b_00412	SR33_H3.C3a_00009	SR34_H3.C3b_00009	SR35_H3.C3c_00009	SR36_H3.C4_00413	SR37_H3.C5_00009	SR38_H3.C6a_00009	SR39_H3.C6b_00009	SR3_H1.C2_01960	SR40_H3.C7a_01515	SR41_H3.C7b_00009	SR42_H3.C8a_01418
group_421		hypothetical protein	75	75	1	69	256	69	23		581	605	604	SR10_H1.C6a_01954	SR11_H1.C6b_01919	SR12_H1.C7a_01990	SR13_H1.C7b_01957	SR14_H1.C7c_01957	SR15_H1.C8_01989	SR16_H1.C9a_01993	SR17_H1.C9b_01989	SR18_H1.C10_01991	SR19_H1.C11_01988	SR1_H1.C1a_01926	SR20_H1.C12_01991	SR21_H1.C13_01956	SR22_H1.C14_01990	SR23_H1.C15a_01956	SR24_H1.C15b_02041	SR25_H1.C16_02040		SR27_H3.C1a_00004	SR28_H3.C1b_00004	SR29_H3.C1c_00004	SR2_H1.C1b_01958	SR30_H3.C1d_00416	SR31_H3.C2a_00418	SR32_H3.C2b_00417	SR33_H3.C3a_00004	SR34_H3.C3b_00004	SR35_H3.C3c_00004	SR36_H3.C4_00418	SR37_H3.C5_00004	SR38_H3.C6a_00004	SR39_H3.C6b_00004	SR3_H1.C2_01954	SR40_H3.C7a_01520	SR41_H3.C7b_00004	SR42_H3.C8a_01413
group_362		IS3 family transposase ISSau2	74	74	1	68	23	68	1		323	683	678	SR10_H1.C6a_01208	SR11_H1.C6b_01235	SR12_H1.C7a_01157	SR13_H1.C7b_01307	SR14_H1.C7c_01096	SR15_H1.C8_01357	SR16_H1.C9a_01323	SR17_H1.C9b_01472	SR18_H1.C10_01419	SR19_H1.C11_01419	SR1_H1.C1a_01237	SR20_H1.C12_01043	SR21_H1.C13_01420	SR22_H1.C14_01358	SR23_H1.C15a_00945		SR25_H1.C16_01471	SR26_H2.C1_01924	SR27_H3.C1a_01125	SR28_H3.C1b_01125	SR29_H3.C1c_00867	SR2_H1.C1b_01418	SR30_H3.C1d_01193	SR31_H3.C2a_01196	SR32_H3.C2b_00752	SR33_H3.C3a_01390	SR34_H3.C3b_01194	SR35_H3.C3c_01194	SR36_H3.C4_00755	SR37_H3.C5_01126	SR38_H3.C6a_01124	SR39_H3.C6b_02307		SR40_H3.C7a_01075	SR41_H3.C7b_00754	SR42_H3.C8a_01075
group_195		flavin reductase family protein	73	73	1	68	21	68	14		515	683	678	SR10_H1.C6a_01141	SR11_H1.C6b_01302	SR12_H1.C7a_01223	SR13_H1.C7b_01374	SR14_H1.C7c_01030	SR15_H1.C8_01290	SR16_H1.C9a_01256	SR17_H1.C9b_01405	SR18_H1.C10_01486	SR19_H1.C11_01486	SR1_H1.C1a_01304	SR20_H1.C12_01110	SR21_H1.C13_01487	SR22_H1.C14_01291	SR23_H1.C15a_00878	SR24_H1.C15b_01292	SR25_H1.C16_01404	SR26_H2.C1_01432	SR27_H3.C1a_01209	SR28_H3.C1b_01209	SR29_H3.C1c_00782	SR2_H1.C1b_01485	SR30_H3.C1d_01109	SR31_H3.C2a_01111	SR32_H3.C2b_00836	SR33_H3.C3a_01305	SR34_H3.C3b_01109	SR35_H3.C3c_01110	SR36_H3.C4_00839	SR37_H3.C5_01211	SR38_H3.C6a_01208	SR39_H3.C6b_01206	SR3_H1.C2_01372	SR40_H3.C7a_00991	SR41_H3.C7b_00838	SR42_H3.C8a_00991
group_520		IS3 family transposase	73	73	1	68	25	68	3		560	560	560	SR10_H1.C6a_01207	SR11_H1.C6b_01236	SR12_H1.C7a_01158	SR13_H1.C7b_01308	SR14_H1.C7c_01095	SR15_H1.C8_01356	SR16_H1.C9a_01322	SR17_H1.C9b_01471	SR18_H1.C10_01420	SR19_H1.C11_01420	SR1_H1.C1a_01238	SR20_H1.C12_01044	SR21_H1.C13_01421	SR22_H1.C14_01357	SR23_H1.C15a_00944		SR25_H1.C16_01470	SR26_H2.C1_01925	SR27_H3.C1a_01126	SR28_H3.C1b_01126	SR29_H3.C1c_00866	SR2_H1.C1b_01419	SR30_H3.C1d_01192	SR31_H3.C2a_01195	SR32_H3.C2b_00753	SR33_H3.C3a_01389	SR34_H3.C3b_01193	SR35_H3.C3c_01193	SR36_H3.C4_00756	SR37_H3.C5_01127	SR38_H3.C6a_01125			SR40_H3.C7a_01074	SR41_H3.C7b_00755	SR42_H3.C8a_01074
group_57		hypothetical protein	73	73	1	63	12	63	12		1430	2921	2734	SR10_H1.C6a_02121	SR11_H1.C6b_02058		SR13_H1.C7b_02113	SR14_H1.C7c_02117	SR15_H1.C8_02120	SR16_H1.C9a_02093	SR17_H1.C9b_02198		SR19_H1.C11_02113	SR1_H1.C1a_02005	SR20_H1.C12_02130	SR21_H1.C13_02112	SR22_H1.C14_02123	SR23_H1.C15a_02124	SR24_H1.C15b_02166	SR25_H1.C16_02147		SR27_H3.C1a_02183	SR28_H3.C1b_02166	SR29_H3.C1c_02161	SR2_H1.C1b_02091	SR30_H3.C1d_02134	SR31_H3.C2a_02182	SR32_H3.C2b_02088	SR33_H3.C3a_02117		SR35_H3.C3c_02142	SR36_H3.C4_02161	SR37_H3.C5_02185	SR38_H3.C6a_02180	SR39_H3.C6b_02180	SR3_H1.C2_02096	SR40_H3.C7a_02132		SR42_H3.C8a_02211
group_77		UvrD-helicase domain-containing protein	68	68	1	68	28	68	6		1277	2051	2024	SR10_H1.C6a_01181	SR11_H1.C6b_01262	SR12_H1.C7a_01184	SR13_H1.C7b_01334	SR14_H1.C7c_01069	SR15_H1.C8_01330	SR16_H1.C9a_01296	SR17_H1.C9b_01445	SR18_H1.C10_01446	SR19_H1.C11_01446	SR1_H1.C1a_01264	SR20_H1.C12_01070	SR21_H1.C13_01447	SR22_H1.C14_01331	SR23_H1.C15a_00918	SR24_H1.C15b_01332	SR25_H1.C16_01444	SR26_H2.C1_01471	SR27_H3.C1a_01171	SR28_H3.C1b_01171		SR2_H1.C1b_01445	SR30_H3.C1d_01147		SR32_H3.C2b_00798			SR35_H3.C3c_01148	SR36_H3.C4_00801		SR38_H3.C6a_01170	SR39_H3.C6b_01168	SR3_H1.C2_01332	SR40_H3.C7a_01029	SR41_H3.C7b_00800	SR42_H3.C8a_01029
group_605		hypothetical protein	67	67	1	68	31	68	10		2498	2498	2498		SR11_H1.C6b_01276	SR12_H1.C7a_01197		SR14_H1.C7c_01056		SR16_H1.C9a_01282	SR17_H1.C9b_01431	SR18_H1.C10_01460	SR19_H1.C11_01460		SR20_H1.C12_01084	SR21_H1.C13_01461	SR22_H1.C14_01317			SR25_H1.C16_01430	SR26_H2.C1_01458	SR27_H3.C1a_01184	SR28_H3.C1b_01184	SR29_H3.C1c_00807		SR30_H3.C1d_01134	SR31_H3.C2a_01136	SR32_H3.C2b_00811	SR33_H3.C3a_01330	SR34_H3.C3b_01134	SR35_H3.C3c_01135	SR36_H3.C4_00814	SR37_H3.C5_01186	SR38_H3.C6a_01183	SR39_H3.C6b_01181		SR40_H3.C7a_01016	SR41_H3.C7b_00813	SR42_H3.C8a_01016
bbp		hypothetical protein	66	66	1	63	10	63	13		1400	2969	2313	SR10_H1.C6a_02119	SR11_H1.C6b_02056	SR12_H1.C7a_02127	SR13_H1.C7b_02115	SR14_H1.C7c_02115	SR15_H1.C8_02118	SR16_H1.C9a_02091	SR17_H1.C9b_02196	SR18_H1.C10_02114	SR19_H1.C11_02111	SR1_H1.C1a_02006	SR20_H1.C12_02128	SR21_H1.C13_02114	SR22_H1.C14_02121	SR23_H1.C15a_02122	SR24_H1.C15b_02164	SR25_H1.C16_02149	SR26_H2.C1_02140			SR29_H3.C1c_02162	SR2_H1.C1b_02089	SR30_H3.C1d_02135		SR32_H3.C2b_02089	SR33_H3.C3a_02118			SR36_H3.C4_02162				SR3_H1.C2_02094	SR40_H3.C7a_02133
group_202		beta-glucoside-specific PTS transporter subunit IIABC	56	56	1	68	32	68	11		956	1895	1878																		SR26_H2.C1_01455	SR27_H3.C1a_01187	SR28_H3.C1b_01187	SR29_H3.C1c_00804		SR30_H3.C1d_01131	SR31_H3.C2a_01133	SR32_H3.C2b_00814	SR33_H3.C3a_01327	SR34_H3.C3b_01131	SR35_H3.C3c_01132	SR36_H3.C4_00817	SR37_H3.C5_01189	SR38_H3.C6a_01186	SR39_H3.C6b_01184		SR40_H3.C7a_01013	SR41_H3.C7b_00816	SR42_H3.C8a_01013
group_42		XcbB/CpsF family capsular polysaccharide biosynthesis protein	56	56	1	69	118	69	84		470	1745	1544	SR10_H1.C6a_01761	SR11_H1.C6b_00993	SR12_H1.C7a_01762	SR13_H1.C7b_01050	SR14_H1.C7c_01764	SR15_H1.C8_01047	SR16_H1.C9a_01165	SR17_H1.C9b_00915	SR18_H1.C10_01162	SR19_H1.C11_01162	SR1_H1.C1a_01173	SR20_H1.C12_01762	SR21_H1.C13_00915	SR22_H1.C14_01048	SR23_H1.C15a_01805	SR24_H1.C15b_01049	SR25_H1.C16_01162	SR26_H2.C1_01991				SR2_H1.C1b_01161											SR3_H1.C2_01050
group_417		hypothetical protein	55	55	1	69	108	69	139		221	221	221	SR10_H1.C6a_01942		SR12_H1.C7a_01891	SR13_H1.C7b_00963	SR14_H1.C7c_01945	SR15_H1.C8_00961	SR16_H1.C9a_01078	SR17_H1.C9b_01001	SR18_H1.C10_01075	SR19_H1.C11_01075		SR20_H1.C12_01944	SR21_H1.C13_01002	SR22_H1.C14_00962	SR23_H1.C15a_01944	SR24_H1.C15b_00963	SR25_H1.C16_01076	SR26_H2.C1_00710	SR27_H3.C1a_01621	SR28_H3.C1b_01622	SR29_H3.C1c_01580	SR2_H1.C1b_01074	SR30_H3.C1d_01620	SR31_H3.C2a_01625			SR34_H3.C3b_01534	SR35_H3.C3c_01621		SR37_H3.C5_01537	SR38_H3.C6a_01619	SR39_H3.C6b_01618	SR3_H1.C2_00963	SR40_H3.C7a_01528	SR41_H3.C7b_01578	SR42_H3.C8a_01528
group_418		hypothetical protein	55	55	1	69	113	69	134		344	671	665	SR10_H1.C6a_01946		SR12_H1.C7a_01887	SR13_H1.C7b_00967	SR14_H1.C7c_01949	SR15_H1.C8_00965	SR16_H1.C9a_01082	SR17_H1.C9b_00997	SR18_H1.C10_01079	SR19_H1.C11_01079		SR20_H1.C12_01948	SR21_H1.C13_00998	SR22_H1.C14_00966	SR23_H1.C15a_01948	SR24_H1.C15b_00967	SR25_H1.C16_01080	SR26_H2.C1_00714	SR27_H3.C1a_01617	SR28_H3.C1b_01618	SR29_H3.C1c_01584	SR2_H1.C1b_01078	SR30_H3.C1d_01616	SR31_H3.C2a_01621			SR34_H3.C3b_01538	SR35_H3.C3c_01617		SR37_H3.C5_01541	SR38_H3.C6a_01615	SR39_H3.C6b_01614	SR3_H1.C2_00967	SR40_H3.C7a_01532	SR41_H3.C7b_01582	SR42_H3.C8a_01532
group_580		hypothetical protein	55	55	1	69	110	69	136		194	194	194	SR10_H1.C6a_01944		SR12_H1.C7a_01889	SR13_H1.C7b_00965	SR14_H1.C7c_01947	SR15_H1.C8_00963	SR16_H1.C9a_01080	SR17_H1.C9b_00999	SR18_H1.C10_01077	SR19_H1.C11_01077		SR20_H1.C12_01946	SR21_H1.C13_01000	SR22_H1.C14_00964	SR23_H1.C15a_01946	SR24_H1.C15b_00965	SR25_H1.C16_01078	SR26_H2.C1_00712	SR27_H3.C1a_01619	SR28_H3.C1b_01620	SR29_H3.C1c_01582	SR2_H1.C1b_01076	SR30_H3.C1d_01618	SR31_H3.C2a_01623			SR34_H3.C3b_01536	SR35_H3.C3c_01619		SR37_H3.C5_01539	SR38_H3.C6a_01617	SR39_H3.C6b_01616	SR3_H1.C2_00965	SR40_H3.C7a_01530	SR41_H3.C7b_01580	SR42_H3.C8a_01530
group_581		hypothetical protein	55	55	1	69	112	69	135		332	332	332	SR10_H1.C6a_01945		SR12_H1.C7a_01888	SR13_H1.C7b_00966	SR14_H1.C7c_01948	SR15_H1.C8_00964	SR16_H1.C9a_01081	SR17_H1.C9b_00998	SR18_H1.C10_01078	SR19_H1.C11_01078		SR20_H1.C12_01947	SR21_H1.C13_00999	SR22_H1.C14_00965	SR23_H1.C15a_01947	SR24_H1.C15b_00966	SR25_H1.C16_01079	SR26_H2.C1_00713	SR27_H3.C1a_01618	SR28_H3.C1b_01619	SR29_H3.C1c_01583	SR2_H1.C1b_01077	SR30_H3.C1d_01617	SR31_H3.C2a_01622			SR34_H3.C3b_01537	SR35_H3.C3c_01618		SR37_H3.C5_01540	SR38_H3.C6a_01616	SR39_H3.C6b_01615	SR3_H1.C2_00966	SR40_H3.C7a_01531	SR41_H3.C7b_01581	SR42_H3.C8a_01531
dut		Deoxyuridine 5'-triphosphate nucleotidohydrolase	54	54	1	69	201	69	230		515	515	515																			SR27_H3.C1a_02041	SR28_H3.C1b_02042	SR29_H3.C1c_02043		SR30_H3.C1d_02129	SR31_H3.C2a_02046	SR32_H3.C2b_02083	SR33_H3.C3a_01993	SR34_H3.C3b_02039	SR35_H3.C3c_02119	SR36_H3.C4_02047	SR37_H3.C5_02043	SR38_H3.C6a_02038	SR39_H3.C6b_02037		SR40_H3.C7a_02061	SR41_H3.C7b_02040	SR42_H3.C8a_02116
group_108		terminase	54	54	1	69	168	69	196		512	3230	3129																			SR27_H3.C1a_02024	SR28_H3.C1b_02025	SR29_H3.C1c_02026		SR30_H3.C1d_02113	SR31_H3.C2a_02029	SR32_H3.C2b_02066	SR33_H3.C3a_01977	SR34_H3.C3b_02022	SR35_H3.C3c_02102	SR36_H3.C4_02030	SR37_H3.C5_02026	SR38_H3.C6a_02021	SR39_H3.C6b_02054		SR40_H3.C7a_02078	SR41_H3.C7b_02057	SR42_H3.C8a_02133
group_158		anthranilate synthase component I	54	54	1	69	243	69	39		989	1403	1211	SR10_H1.C6a_00645	SR11_H1.C6b_00789	SR12_H1.C7a_00791	SR13_H1.C7b_00533	SR14_H1.C7c_00791	SR15_H1.C8_00790	SR16_H1.C9a_00793	SR17_H1.C9b_00645	SR18_H1.C10_00791	SR19_H1.C11_00790	SR1_H1.C1a_00790	SR20_H1.C12_00532	SR21_H1.C13_00791	SR22_H1.C14_00791	SR23_H1.C15a_00791	SR24_H1.C15b_00532	SR25_H1.C16_00791		SR27_H3.C1a_00182	SR28_H3.C1b_00182	SR29_H3.C1c_00183	SR2_H1.C1b_00645	SR30_H3.C1d_00238	SR31_H3.C2a_00239	SR32_H3.C2b_00239	SR33_H3.C3a_00183	SR34_H3.C3b_00182	SR35_H3.C3c_00182	SR36_H3.C4_00240	SR37_H3.C5_00182	SR38_H3.C6a_00182	SR39_H3.C6b_00182	SR3_H1.C2_00532	SR40_H3.C7a_00239	SR41_H3.C7b_00182	SR42_H3.C8a_00067
group_309		hypothetical protein	54	54	1	68	26	68	4		167	1784	1754																		SR26_H2.C1_01502	SR27_H3.C1a_01140	SR28_H3.C1b_01140	SR29_H3.C1c_00852		SR30_H3.C1d_01178	SR31_H3.C2a_01181	SR32_H3.C2b_00767	SR33_H3.C3a_01375	SR34_H3.C3b_01179	SR35_H3.C3c_01179	SR36_H3.C4_00770	SR37_H3.C5_01141	SR38_H3.C6a_01139	SR39_H3.C6b_01137		SR40_H3.C7a_01060	SR41_H3.C7b_00769	SR42_H3.C8a_01060
group_315		hypothetical protein	54	54	1	69	198	69	227		458	494	474																			SR27_H3.C1a_02038	SR28_H3.C1b_02039	SR29_H3.C1c_02040		SR30_H3.C1d_02126	SR31_H3.C2a_02043	SR32_H3.C2b_02080	SR33_H3.C3a_01990	SR34_H3.C3b_02036	SR35_H3.C3c_02116	SR36_H3.C4_02044	SR37_H3.C5_02040	SR38_H3.C6a_02035	SR39_H3.C6b_02040		SR40_H3.C7a_02064	SR41_H3.C7b_02043	SR42_H3.C8a_02119
group_457		hypothetical protein	54	54	1	69	199	69	228		407	407	407																			SR27_H3.C1a_02039	SR28_H3.C1b_02040	SR29_H3.C1c_02041		SR30_H3.C1d_02127	SR31_H3.C2a_02044	SR32_H3.C2b_02081	SR33_H3.C3a_01991	SR34_H3.C3b_02037	SR35_H3.C3c_02117	SR36_H3.C4_02045	SR37_H3.C5_02041	SR38_H3.C6a_02036	SR39_H3.C6b_02039		SR40_H3.C7a_02063	SR41_H3.C7b_02042	SR42_H3.C8a_02118
group_579		hypothetical protein	54	54	1	69	109	69	137		782	782	782	SR10_H1.C6a_01943		SR12_H1.C7a_01890	SR13_H1.C7b_00964	SR14_H1.C7c_01946	SR15_H1.C8_00962	SR16_H1.C9a_01079	SR17_H1.C9b_01000	SR18_H1.C10_01076	SR19_H1.C11_01076		SR20_H1.C12_01945	SR21_H1.C13_01001	SR22_H1.C14_00963	SR23_H1.C15a_01945	SR24_H1.C15b_00964	SR25_H1.C16_01077	SR26_H2.C1_00711	SR27_H3.C1a_01620	SR28_H3.C1b_01621	SR29_H3.C1c_01581	SR2_H1.C1b_01075	SR30_H3.C1d_01619	SR31_H3.C2a_01624			SR34_H3.C3b_01535	SR35_H3.C3c_01620		SR37_H3.C5_01538	SR38_H3.C6a_01618	SR39_H3.C6b_01617	SR3_H1.C2_00964	SR40_H3.C7a_01529	SR41_H3.C7b_01579	SR42_H3.C8a_01529
group_673		hypothetical protein	54	54	1	68	27	68	5		665	665	665																		SR26_H2.C1_01499	SR27_H3.C1a_01143	SR28_H3.C1b_01143	SR29_H3.C1c_00849		SR30_H3.C1d_01175	SR31_H3.C2a_01178	SR32_H3.C2b_00770	SR33_H3.C3a_01372	SR34_H3.C3b_01176	SR35_H3.C3c_01176	SR36_H3.C4_00773	SR37_H3.C5_01144	SR38_H3.C6a_01142	SR39_H3.C6b_01140		SR40_H3.C7a_01057	SR41_H3.C7b_00772	SR42_H3.C8a_01057
group_696		hypothetical protein	54	54	1	69	169	69	197		275	275	275																			SR27_H3.C1a_02025	SR28_H3.C1b_02026	SR29_H3.C1c_02027		SR30_H3.C1d_02114	SR31_H3.C2a_02030	SR32_H3.C2b_02067	SR33_H3.C3a_01978	SR34_H3.C3b_02023	SR35_H3.C3c_02103	SR36_H3.C4_02031	SR37_H3.C5_02027	SR38_H3.C6a_02022	SR39_H3.C6b_02053		SR40_H3.C7a_02077	SR41_H3.C7b_02056	SR42_H3.C8a_02132
group_703		hypothetical protein	54	54	1	69	200	69	229		116	116	116																			SR27_H3.C1a_02040	SR28_H3.C1b_02041	SR29_H3.C1c_02042		SR30_H3.C1d_02128	SR31_H3.C2a_02045	SR32_H3.C2b_02082	SR33_H3.C3a_01992	SR34_H3.C3b_02038	SR35_H3.C3c_02118	SR36_H3.C4_02046	SR37_H3.C5_02042	SR38_H3.C6a_02037	SR39_H3.C6b_02038		SR40_H3.C7a_02062	SR41_H3.C7b_02041	SR42_H3.C8a_02117
group_110		YopX family protein	53	53	1	69	205	69	234		119	407	377																			SR27_H3.C1a_02045	SR28_H3.C1b_02046	SR29_H3.C1c_02047		SR30_H3.C1d_02133	SR31_H3.C2a_02050	SR32_H3.C2b_02087	SR33_H3.C3a_01997	SR34_H3.C3b_02043	SR35_H3.C3c_02123	SR36_H3.C4_02051	SR37_H3.C5_02047	SR38_H3.C6a_02042	SR39_H3.C6b_02033		SR40_H3.C7a_02057	SR41_H3.C7b_02036	SR42_H3.C8a_02112
group_460		hypothetical protein	53	53	1	69	203	69	232		398	398	398																			SR27_H3.C1a_02043	SR28_H3.C1b_02044	SR29_H3.C1c_02045		SR30_H3.C1d_02131	SR31_H3.C2a_02048	SR32_H3.C2b_02085	SR33_H3.C3a_01995	SR34_H3.C3b_02041	SR35_H3.C3c_02121	SR36_H3.C4_02049	SR37_H3.C5_02045	SR38_H3.C6a_02040	SR39_H3.C6b_02035		SR40_H3.C7a_02059	SR41_H3.C7b_02038	SR42_H3.C8a_02114
group_461		hypothetical protein	53	53	1	69	204	69	233		200	299	252																			SR27_H3.C1a_02044	SR28_H3.C1b_02045	SR29_H3.C1c_02046		SR30_H3.C1d_02132	SR31_H3.C2a_02049	SR32_H3.C2b_02086	SR33_H3.C3a_01996	SR34_H3.C3b_02042	SR35_H3.C3c_02122	SR36_H3.C4_02050	SR37_H3.C5_02046	SR38_H3.C6a_02041	SR39_H3.C6b_02034		SR40_H3.C7a_02058	SR41_H3.C7b_02037	SR42_H3.C8a_02113
group_690		hypothetical protein	53	53	1	69	167	69	195		524	524	524																			SR27_H3.C1a_02012	SR28_H3.C1b_02013	SR29_H3.C1c_02014		SR30_H3.C1d_02101	SR31_H3.C2a_02017	SR32_H3.C2b_02054	SR33_H3.C3a_01965	SR34_H3.C3b_02010	SR35_H3.C3c_02090	SR36_H3.C4_02018	SR37_H3.C5_02014	SR38_H3.C6a_02009	SR39_H3.C6b_02066		SR40_H3.C7a_02090	SR41_H3.C7b_02069	SR42_H3.C8a_02145
group_31		hypothetical protein	52	52	1	69	181	69	209		251	428	396																			SR27_H3.C1a_02028	SR28_H3.C1b_02029	SR29_H3.C1c_02030		SR30_H3.C1d_02117	SR31_H3.C2a_02033	SR32_H3.C2b_02070	SR33_H3.C3a_01980	SR34_H3.C3b_02026	SR35_H3.C3c_02106	SR36_H3.C4_02034	SR37_H3.C5_02030	SR38_H3.C6a_02025	SR39_H3.C6b_02050		SR40_H3.C7a_02074	SR41_H3.C7b_02053	SR42_H3.C8a_02129
group_43		XcbB/CpsF family capsular polysaccharide biosynthesis protein	52	52	1	69	116	69	86		272	1745	1017	SR10_H1.C6a_01762	SR11_H1.C6b_00994	SR12_H1.C7a_01763	SR13_H1.C7b_01049	SR14_H1.C7c_01765	SR15_H1.C8_01046	SR16_H1.C9a_01164	SR17_H1.C9b_00916	SR18_H1.C10_01161	SR19_H1.C11_01161	SR1_H1.C1a_01172	SR20_H1.C12_01763	SR21_H1.C13_00916	SR22_H1.C14_01047	SR23_H1.C15a_01806	SR24_H1.C15b_01048	SR25_H1.C16_01161		SR27_H3.C1a_01538	SR28_H3.C1b_01539	SR29_H3.C1c_01663	SR2_H1.C1b_01160	SR30_H3.C1d_01537	SR31_H3.C2a_01541	SR32_H3.C2b_01105	SR33_H3.C3a_00706	SR34_H3.C3b_01617	SR35_H3.C3c_01538	SR36_H3.C4_01109	SR37_H3.C5_01621	SR38_H3.C6a_01536	SR39_H3.C6b_01535	SR3_H1.C2_01049	SR40_H3.C7a_01611	SR41_H3.C7b_01661	SR42_H3.C8a_01612
group_587		hypothetical protein	52	52	1	69	259	69	26		509	509	509	SR10_H1.C6a_01957	SR11_H1.C6b_01916	SR12_H1.C7a_01987	SR13_H1.C7b_01960	SR14_H1.C7c_01960	SR15_H1.C8_01986	SR16_H1.C9a_01990	SR17_H1.C9b_01986	SR18_H1.C10_01988	SR19_H1.C11_01985	SR1_H1.C1a_01923	SR20_H1.C12_01988	SR21_H1.C13_01959	SR22_H1.C14_01987	SR23_H1.C15a_01959	SR24_H1.C15b_02038	SR25_H1.C16_02037					SR2_H1.C1b_01961											SR3_H1.C2_01957
group_704		hypothetical protein	52	52	1	69	202	69	231		332	338	334																			SR27_H3.C1a_02042	SR28_H3.C1b_02043	SR29_H3.C1c_02044		SR30_H3.C1d_02130	SR31_H3.C2a_02047	SR32_H3.C2b_02084	SR33_H3.C3a_01994	SR34_H3.C3b_02040	SR35_H3.C3c_02120	SR36_H3.C4_02048	SR37_H3.C5_02044	SR38_H3.C6a_02039	SR39_H3.C6b_02036		SR40_H3.C7a_02060	SR41_H3.C7b_02039	SR42_H3.C8a_02115
group_705		hypothetical protein	52	52	1	69	206	69	235		320	320	320																			SR27_H3.C1a_02046	SR28_H3.C1b_02047	SR29_H3.C1c_02048		SR30_H3.C1d_02222	SR31_H3.C2a_02051	SR32_H3.C2b_02176	SR33_H3.C3a_01998	SR34_H3.C3b_02044	SR35_H3.C3c_02212	SR36_H3.C4_02274	SR37_H3.C5_02048	SR38_H3.C6a_02043	SR39_H3.C6b_02032		SR40_H3.C7a_02056	SR41_H3.C7b_02035	SR42_H3.C8a_02111
group_727		VRR-NUC domain-containing protein	52	52	1	69	68	69	162		308	308	308																			SR27_H3.C1a_02283	SR28_H3.C1b_02288	SR29_H3.C1c_02279		SR30_H3.C1d_02283	SR31_H3.C2a_02282	SR32_H3.C2b_02220	SR33_H3.C3a_02222	SR34_H3.C3b_02285	SR35_H3.C3c_02269	SR36_H3.C4_02057	SR37_H3.C5_02285	SR38_H3.C6a_02280	SR39_H3.C6b_02281		SR40_H3.C7a_02257	SR41_H3.C7b_02283	SR42_H3.C8a_02318
group_728		hypothetical protein	52	52	1	69	67	69	161		2312	2312	2312																			SR27_H3.C1a_02284	SR28_H3.C1b_02287	SR29_H3.C1c_02280		SR30_H3.C1d_02282	SR31_H3.C2a_02283	SR32_H3.C2b_02221	SR33_H3.C3a_02223	SR34_H3.C3b_02284	SR35_H3.C3c_02270	SR36_H3.C4_02058	SR37_H3.C5_02286	SR38_H3.C6a_02281	SR39_H3.C6b_02282		SR40_H3.C7a_02258	SR41_H3.C7b_02284	SR42_H3.C8a_02319
group_729		hypothetical protein	52	52	1	69	66	69	160		500	500	500																			SR27_H3.C1a_02285	SR28_H3.C1b_02286	SR29_H3.C1c_02281		SR30_H3.C1d_02281	SR31_H3.C2a_02284	SR32_H3.C2b_02222	SR33_H3.C3a_02224	SR34_H3.C3b_02283	SR35_H3.C3c_02271	SR36_H3.C4_02059	SR37_H3.C5_02287	SR38_H3.C6a_02282	SR39_H3.C6b_02283		SR40_H3.C7a_02259	SR41_H3.C7b_02285	SR42_H3.C8a_02320
group_731		PH domain-containing protein	52	52	1	69	57	69	151		725	725	725																			SR27_H3.C1a_02288	SR28_H3.C1b_02289	SR29_H3.C1c_02293		SR30_H3.C1d_02284	SR31_H3.C2a_02287	SR32_H3.C2b_02237	SR33_H3.C3a_02240	SR34_H3.C3b_02286	SR35_H3.C3c_02274	SR36_H3.C4_02074	SR37_H3.C5_02290	SR38_H3.C6a_02285	SR39_H3.C6b_02286		SR40_H3.C7a_02264	SR41_H3.C7b_02288	SR42_H3.C8a_02323
group_733		hypothetical protein	52	52	1	69	59	69	153		470	470	470																			SR27_H3.C1a_02290	SR28_H3.C1b_02291	SR29_H3.C1c_02291		SR30_H3.C1d_02286	SR31_H3.C2a_02289	SR32_H3.C2b_02236	SR33_H3.C3a_02238	SR34_H3.C3b_02288	SR35_H3.C3c_02276	SR36_H3.C4_02073	SR37_H3.C5_02291	SR38_H3.C6a_02287	SR39_H3.C6b_02288		SR40_H3.C7a_02266	SR41_H3.C7b_02290	SR42_H3.C8a_02325
group_734		hypothetical protein	52	52	1	69	60	69	154		314	314	314																			SR27_H3.C1a_02291	SR28_H3.C1b_02292	SR29_H3.C1c_02290		SR30_H3.C1d_02287	SR31_H3.C2a_02290	SR32_H3.C2b_02235	SR33_H3.C3a_02237	SR34_H3.C3b_02289	SR35_H3.C3c_02277	SR36_H3.C4_02072	SR37_H3.C5_02292	SR38_H3.C6a_02288	SR39_H3.C6b_02289		SR40_H3.C7a_02267	SR41_H3.C7b_02291	SR42_H3.C8a_02326
group_735		hypothetical protein	52	52	1	69	61	69	155		212	212	212																			SR27_H3.C1a_02292	SR28_H3.C1b_02293	SR29_H3.C1c_02289		SR30_H3.C1d_02288	SR31_H3.C2a_02291	SR32_H3.C2b_02234	SR33_H3.C3a_02236	SR34_H3.C3b_02290	SR35_H3.C3c_02278	SR36_H3.C4_02071	SR37_H3.C5_02293	SR38_H3.C6a_02289	SR39_H3.C6b_02290		SR40_H3.C7a_02268	SR41_H3.C7b_02292	SR42_H3.C8a_02327
group_736		hypothetical protein	52	52	1	69	62	69	156		194	194	194																			SR27_H3.C1a_02293	SR28_H3.C1b_02294	SR29_H3.C1c_02288		SR30_H3.C1d_02289	SR31_H3.C2a_02292	SR32_H3.C2b_02233	SR33_H3.C3a_02235	SR34_H3.C3b_02291	SR35_H3.C3c_02279	SR36_H3.C4_02070	SR37_H3.C5_02294	SR38_H3.C6a_02290	SR39_H3.C6b_02291		SR40_H3.C7a_02269	SR41_H3.C7b_02293	SR42_H3.C8a_02328
group_738		hypothetical protein	52	52	1	69	63	69	157		140	140	140																			SR27_H3.C1a_02297	SR28_H3.C1b_02298	SR29_H3.C1c_02284		SR30_H3.C1d_02293	SR31_H3.C2a_02296	SR32_H3.C2b_02229	SR33_H3.C3a_02231	SR34_H3.C3b_02295	SR35_H3.C3c_02283	SR36_H3.C4_02066	SR37_H3.C5_02298	SR38_H3.C6a_02294	SR39_H3.C6b_02295		SR40_H3.C7a_02273	SR41_H3.C7b_02297	SR42_H3.C8a_02332
radD_2		Putative DNA repair helicase RadD	52	52	1	69	65	69	159		1331	1331	1331																			SR27_H3.C1a_02286	SR28_H3.C1b_02285	SR29_H3.C1c_02282		SR30_H3.C1d_02280	SR31_H3.C2a_02285	SR32_H3.C2b_02223	SR33_H3.C3a_02225	SR34_H3.C3b_02282	SR35_H3.C3c_02272	SR36_H3.C4_02060	SR37_H3.C5_02288	SR38_H3.C6a_02283	SR39_H3.C6b_02284		SR40_H3.C7a_02260	SR41_H3.C7b_02286	SR42_H3.C8a_02321
group_313		phage head-tail adapter protein	51	51	1	69	184	69	213		335	335	335																			SR27_H3.C1a_02030	SR28_H3.C1b_02031	SR29_H3.C1c_02032		SR30_H3.C1d_02119	SR31_H3.C2a_02035	SR32_H3.C2b_02072	SR33_H3.C3a_01982	SR34_H3.C3b_02028	SR35_H3.C3c_02108	SR36_H3.C4_02036	SR37_H3.C5_02032	SR38_H3.C6a_02027	SR39_H3.C6b_02048		SR40_H3.C7a_02072	SR41_H3.C7b_02051	SR42_H3.C8a_02127
group_314		hypothetical protein	51	51	1	69	197	69	226		1220	1238	1221																			SR27_H3.C1a_02037	SR28_H3.C1b_02038	SR29_H3.C1c_02039		SR30_H3.C1d_02125	SR31_H3.C2a_02042	SR32_H3.C2b_02079	SR33_H3.C3a_01989	SR34_H3.C3b_02035	SR35_H3.C3c_02115	SR36_H3.C4_02043	SR37_H3.C5_02039	SR38_H3.C6a_02034	SR39_H3.C6b_02041		SR40_H3.C7a_02065	SR41_H3.C7b_02044	SR42_H3.C8a_02120
group_56		hypothetical protein	51	51	1	69	64	69	158	Hypothetical protein with no hits to refseq/uniprot/clusters/cdd/tigrfams/pfam overlapping another protein with hits	158	704	393																			SR27_H3.C1a_02287	SR28_H3.C1b_02284	SR29_H3.C1c_02283		SR30_H3.C1d_02279	SR31_H3.C2a_02286	SR32_H3.C2b_02224	SR33_H3.C3a_02226	SR34_H3.C3b_02281	SR35_H3.C3c_02273	SR36_H3.C4_02061	SR37_H3.C5_02289	SR38_H3.C6a_02284	SR39_H3.C6b_02285		SR40_H3.C7a_02261	SR41_H3.C7b_02287	SR42_H3.C8a_02322
group_689		hypothetical protein	51	51	1	69	166	69	194		425	425	425																			SR27_H3.C1a_02011	SR28_H3.C1b_02012	SR29_H3.C1c_02013		SR30_H3.C1d_02100	SR31_H3.C2a_02016	SR32_H3.C2b_02053	SR33_H3.C3a_01964	SR34_H3.C3b_02009	SR35_H3.C3c_02089	SR36_H3.C4_02017	SR37_H3.C5_02013	SR38_H3.C6a_02008	SR39_H3.C6b_02067		SR40_H3.C7a_02091	SR41_H3.C7b_02070	SR42_H3.C8a_02146
group_698		hypothetical protein	51	51	1	69	185	69	214		350	350	350																			SR27_H3.C1a_02031	SR28_H3.C1b_02032	SR29_H3.C1c_02033		SR30_H3.C1d_02120	SR31_H3.C2a_02036	SR32_H3.C2b_02073	SR33_H3.C3a_01983	SR34_H3.C3b_02029	SR35_H3.C3c_02109	SR36_H3.C4_02037	SR37_H3.C5_02033	SR38_H3.C6a_02028	SR39_H3.C6b_02047		SR40_H3.C7a_02071	SR41_H3.C7b_02050	SR42_H3.C8a_02126
group_699		hypothetical protein	51	51	1	69	186	69	215		143	143	143																			SR27_H3.C1a_02032	SR28_H3.C1b_02033	SR29_H3.C1c_02034		SR30_H3.C1d_02121	SR31_H3.C2a_02037	SR32_H3.C2b_02074	SR33_H3.C3a_01984	SR34_H3.C3b_02030	SR35_H3.C3c_02110	SR36_H3.C4_02038	SR37_H3.C5_02034	SR38_H3.C6a_02029	SR39_H3.C6b_02046		SR40_H3.C7a_02070	SR41_H3.C7b_02049	SR42_H3.C8a_02125
group_701		hypothetical protein	51	51	1	69	194	69	223		584	584	584																			SR27_H3.C1a_02034	SR28_H3.C1b_02035	SR29_H3.C1c_02036		SR30_H3.C1d_02122	SR31_H3.C2a_02039	SR32_H3.C2b_02076	SR33_H3.C3a_01986	SR34_H3.C3b_02032	SR35_H3.C3c_02112	SR36_H3.C4_02040	SR37_H3.C5_02036	SR38_H3.C6a_02031	SR39_H3.C6b_02044		SR40_H3.C7a_02068	SR41_H3.C7b_02047	SR42_H3.C8a_02123
group_456		phage portal protein	50	50	1	69	196	69	225		1187	1415	1405																			SR27_H3.C1a_02036	SR28_H3.C1b_02037	SR29_H3.C1c_02038		SR30_H3.C1d_02124	SR31_H3.C2a_02041	SR32_H3.C2b_02078	SR33_H3.C3a_01988	SR34_H3.C3b_02034	SR35_H3.C3c_02114	SR36_H3.C4_02042	SR37_H3.C5_02038	SR38_H3.C6a_02033	SR39_H3.C6b_02042		SR40_H3.C7a_02066	SR41_H3.C7b_02045	SR42_H3.C8a_02121
group_700		hypothetical protein	50	50	1	69	187	69	216		914	914	914																			SR27_H3.C1a_02033	SR28_H3.C1b_02034	SR29_H3.C1c_02035			SR31_H3.C2a_02038	SR32_H3.C2b_02075	SR33_H3.C3a_01985	SR34_H3.C3b_02031	SR35_H3.C3c_02111	SR36_H3.C4_02039	SR37_H3.C5_02035	SR38_H3.C6a_02030	SR39_H3.C6b_02045		SR40_H3.C7a_02069	SR41_H3.C7b_02048	SR42_H3.C8a_02124
group_702		phage head morphogenesis protein	50	50	1	69	195	69	224		941	941	941																			SR27_H3.C1a_02035	SR28_H3.C1b_02036	SR29_H3.C1c_02037		SR30_H3.C1d_02123	SR31_H3.C2a_02040	SR32_H3.C2b_02077	SR33_H3.C3a_01987	SR34_H3.C3b_02033	SR35_H3.C3c_02113	SR36_H3.C4_02041	SR37_H3.C5_02037	SR38_H3.C6a_02032	SR39_H3.C6b_02043		SR40_H3.C7a_02067	SR41_H3.C7b_02046	SR42_H3.C8a_02122
ydhF		hypothetical protein	49	49	1						251	908	572																		SR26_H2.C1_01987	SR27_H3.C1a_01534	SR28_H3.C1b_01535	SR29_H3.C1c_01667		SR30_H3.C1d_01533	SR31_H3.C2a_01537	SR32_H3.C2b_01109	SR33_H3.C3a_00702	SR34_H3.C3b_01621	SR35_H3.C3c_01534	SR36_H3.C4_01113	SR37_H3.C5_01625	SR38_H3.C6a_01532	SR39_H3.C6b_01531		SR40_H3.C7a_01615	SR41_H3.C7b_01665	SR42_H3.C8a_01616
group_541		hypothetical protein	49	49	1	68	7	68	26		1955	1955	1955	SR10_H1.C6a_01853	SR11_H1.C6b_01866	SR12_H1.C7a_01869	SR13_H1.C7b_01925	SR14_H1.C7c_01856	SR15_H1.C8_01937	SR16_H1.C9a_01201	SR17_H1.C9b_01922	SR18_H1.C10_01938		SR1_H1.C1a_01873	SR20_H1.C12_01870	SR21_H1.C13_01939	SR22_H1.C14_01938	SR23_H1.C15a_00823	SR24_H1.C15b_01923	SR25_H1.C16_01937	SR26_H2.C1_01955				SR2_H1.C1b_01926											SR3_H1.C2_01937
group_604		hypothetical protein	45	45	1	69	10	69	42		116	116	116		SR11_H1.C6b_00718	SR12_H1.C7a_00719	SR13_H1.C7b_00604	SR14_H1.C7c_00719	SR15_H1.C8_00719	SR16_H1.C9a_00721	SR17_H1.C9b_00717	SR18_H1.C10_00719	SR19_H1.C11_00719	SR1_H1.C1a_00719		SR21_H1.C13_00719		SR23_H1.C15a_00719		SR25_H1.C16_00719				SR29_H3.C1c_00254					SR33_H3.C3a_00254			SR36_H3.C4_00169				SR3_H1.C2_00604	SR40_H3.C7a_00168	SR41_H3.C7b_00253
group_156		helix-turn-helix domain-containing protein	43	43	1	69	244	69	38		1616	2030	2020	SR10_H1.C6a_00640		SR12_H1.C7a_00796				SR16_H1.C9a_00798	SR17_H1.C9b_00640	SR18_H1.C10_00796	SR19_H1.C11_00795			SR21_H1.C13_00796				SR25_H1.C16_00796		SR27_H3.C1a_00177	SR28_H3.C1b_00177	SR29_H3.C1c_00178	SR2_H1.C1b_00640	SR30_H3.C1d_00243	SR31_H3.C2a_00244	SR32_H3.C2b_00244	SR33_H3.C3a_00178	SR34_H3.C3b_00177	SR35_H3.C3c_00177	SR36_H3.C4_00245	SR37_H3.C5_00177	SR38_H3.C6a_00177	SR39_H3.C6b_00177		SR40_H3.C7a_00244	SR41_H3.C7b_00177	SR42_H3.C8a_00062
group_408		hypothetical protein	43	43	1	69	137	69	167		113	212	140	SR10_H1.C6a_01920		SR12_H1.C7a_01913	SR13_H1.C7b_00941	SR14_H1.C7c_01923	SR15_H1.C8_00939	SR16_H1.C9a_01056	SR17_H1.C9b_01023	SR18_H1.C10_01054	SR19_H1.C11_01053		SR20_H1.C12_01922	SR21_H1.C13_01024	SR22_H1.C14_00940	SR23_H1.C15a_01922	SR24_H1.C15b_00941	SR25_H1.C16_01054					SR2_H1.C1b_01053			SR32_H3.C2b_02216	SR33_H3.C3a_02218			SR36_H3.C4_02053				SR3_H1.C2_00941
group_316		ATP-binding protein	41	41	1	69	216	69	258		788	788	788																			SR27_H3.C1a_02051	SR28_H3.C1b_02052	SR29_H3.C1c_02053		SR30_H3.C1d_02227	SR31_H3.C2a_02056	SR32_H3.C2b_02181	SR33_H3.C3a_02003	SR34_H3.C3b_02049	SR35_H3.C3c_02217	SR36_H3.C4_02269	SR37_H3.C5_02053	SR38_H3.C6a_02048	SR39_H3.C6b_02027		SR40_H3.C7a_02051	SR41_H3.C7b_02030	SR42_H3.C8a_02106
group_317		hypothetical protein	41	41	1	69	233	69	51		542	776	730																			SR27_H3.C1a_02067	SR28_H3.C1b_02068	SR29_H3.C1c_02069		SR30_H3.C1d_02243	SR31_H3.C2a_02072	SR32_H3.C2b_02197	SR33_H3.C3a_02019	SR34_H3.C3b_02065	SR35_H3.C3c_02233	SR36_H3.C4_02253	SR37_H3.C5_02069	SR38_H3.C6a_02064	SR39_H3.C6b_02011		SR40_H3.C7a_02253	SR41_H3.C7b_02014	SR42_H3.C8a_02313
group_462		RusA family crossover junction endodeoxyribonuclease	41	41	1	69	208	69	255		425	425	425																			SR27_H3.C1a_02048	SR28_H3.C1b_02049	SR29_H3.C1c_02050		SR30_H3.C1d_02224	SR31_H3.C2a_02053	SR32_H3.C2b_02178	SR33_H3.C3a_02000	SR34_H3.C3b_02046	SR35_H3.C3c_02214	SR36_H3.C4_02272	SR37_H3.C5_02050	SR38_H3.C6a_02045	SR39_H3.C6b_02030		SR40_H3.C7a_02054	SR41_H3.C7b_02033	SR42_H3.C8a_02109
group_687		hypothetical protein	41	41	1	69	162	69	192		209	209	209																			SR27_H3.C1a_02009	SR28_H3.C1b_02010	SR29_H3.C1c_02011		SR30_H3.C1d_02301	SR31_H3.C2a_02014	SR32_H3.C2b_02051	SR33_H3.C3a_01962	SR34_H3.C3b_02007	SR35_H3.C3c_02087	SR36_H3.C4_02015	SR37_H3.C5_02011	SR38_H3.C6a_02006	SR39_H3.C6b_02069		SR40_H3.C7a_02093	SR41_H3.C7b_02072	SR42_H3.C8a_02148
group_688		hypothetical protein	41	41	1	69	163	69	193		116	116	116																			SR27_H3.C1a_02010	SR28_H3.C1b_02011	SR29_H3.C1c_02012		SR30_H3.C1d_02300	SR31_H3.C2a_02015	SR32_H3.C2b_02052	SR33_H3.C3a_01963	SR34_H3.C3b_02008	SR35_H3.C3c_02088	SR36_H3.C4_02016	SR37_H3.C5_02012	SR38_H3.C6a_02007	SR39_H3.C6b_02068		SR40_H3.C7a_02092	SR41_H3.C7b_02071	SR42_H3.C8a_02147
group_715		hypothetical protein	41	41	1	69	227	69	269		170	170	170																			SR27_H3.C1a_02061	SR28_H3.C1b_02062	SR29_H3.C1c_02063		SR30_H3.C1d_02237	SR31_H3.C2a_02066	SR32_H3.C2b_02191	SR33_H3.C3a_02013	SR34_H3.C3b_02059	SR35_H3.C3c_02227	SR36_H3.C4_02259	SR37_H3.C5_02063	SR38_H3.C6a_02058	SR39_H3.C6b_02017		SR40_H3.C7a_02041	SR41_H3.C7b_02020	SR42_H3.C8a_02096
group_716		hypothetical protein	41	41	1	69	228	69	56		275	275	275																			SR27_H3.C1a_02062	SR28_H3.C1b_02063	SR29_H3.C1c_02064		SR30_H3.C1d_02238	SR31_H3.C2a_02067	SR32_H3.C2b_02192	SR33_H3.C3a_02014	SR34_H3.C3b_02060	SR35_H3.C3c_02228	SR36_H3.C4_02258	SR37_H3.C5_02064	SR38_H3.C6a_02059	SR39_H3.C6b_02016		SR40_H3.C7a_02040	SR41_H3.C7b_02019	SR42_H3.C8a_02095
group_719		hypothetical protein	41	41	1	69	230	69	54		716	716	716																			SR27_H3.C1a_02064	SR28_H3.C1b_02065	SR29_H3.C1c_02066		SR30_H3.C1d_02240	SR31_H3.C2a_02069	SR32_H3.C2b_02194	SR33_H3.C3a_02016	SR34_H3.C3b_02062	SR35_H3.C3c_02230	SR36_H3.C4_02256	SR37_H3.C5_02066	SR38_H3.C6a_02061	SR39_H3.C6b_02014		SR40_H3.C7a_02256	SR41_H3.C7b_02017	SR42_H3.C8a_02310
group_720		hypothetical protein	41	41	1	69	231	69	53		167	167	167																			SR27_H3.C1a_02065	SR28_H3.C1b_02066	SR29_H3.C1c_02067		SR30_H3.C1d_02241	SR31_H3.C2a_02070	SR32_H3.C2b_02195	SR33_H3.C3a_02017	SR34_H3.C3b_02063	SR35_H3.C3c_02231	SR36_H3.C4_02255	SR37_H3.C5_02067	SR38_H3.C6a_02062	SR39_H3.C6b_02013		SR40_H3.C7a_02255	SR41_H3.C7b_02016	SR42_H3.C8a_02311
group_721		hypothetical protein	41	41	1	69	232	69	52		209	209	209																			SR27_H3.C1a_02066	SR28_H3.C1b_02067	SR29_H3.C1c_02068		SR30_H3.C1d_02242	SR31_H3.C2a_02071	SR32_H3.C2b_02196	SR33_H3.C3a_02018	SR34_H3.C3b_02064	SR35_H3.C3c_02232	SR36_H3.C4_02254	SR37_H3.C5_02068	SR38_H3.C6a_02063	SR39_H3.C6b_02012		SR40_H3.C7a_02254	SR41_H3.C7b_02015	SR42_H3.C8a_02312
group_722		hypothetical protein	41	41	1	69	234	69	50		554	554	554																			SR27_H3.C1a_02068	SR28_H3.C1b_02069	SR29_H3.C1c_02070		SR30_H3.C1d_02244	SR31_H3.C2a_02073	SR32_H3.C2b_02198	SR33_H3.C3a_02020	SR34_H3.C3b_02066	SR35_H3.C3c_02234	SR36_H3.C4_02252	SR37_H3.C5_02070	SR38_H3.C6a_02065	SR39_H3.C6b_02010		SR40_H3.C7a_02252	SR41_H3.C7b_02013	SR42_H3.C8a_02314
group_723		hypothetical protein	41	41	1	69	235	69	48		443	443	443																			SR27_H3.C1a_02069	SR28_H3.C1b_02070	SR29_H3.C1c_02071		SR30_H3.C1d_02245	SR31_H3.C2a_02074	SR32_H3.C2b_02199	SR33_H3.C3a_02021	SR34_H3.C3b_02067	SR35_H3.C3c_02235	SR36_H3.C4_02251	SR37_H3.C5_02071	SR38_H3.C6a_02066	SR39_H3.C6b_02009		SR40_H3.C7a_02251	SR41_H3.C7b_02012	SR42_H3.C8a_02315
xerD_1		site-specific integrase	41	41	1	69	239	69	44		239	1130	734																			SR27_H3.C1a_00420	SR28_H3.C1b_00420	SR29_H3.C1c_00422		SR30_H3.C1d_02304	SR31_H3.C2a_00001	SR32_H3.C2b_00001	SR33_H3.C3a_02253	SR34_H3.C3b_02300	SR35_H3.C3c_00420	SR36_H3.C4_00001	SR37_H3.C5_00420	SR38_H3.C6a_02305	SR39_H3.C6b_02262		SR40_H3.C7a_02285	SR41_H3.C7b_00421	SR42_H3.C8a_02341
group_724		hypothetical protein	40	40	1	69	236	69	47		212	212	212																			SR27_H3.C1a_02070	SR28_H3.C1b_02071	SR29_H3.C1c_02072		SR30_H3.C1d_02246	SR31_H3.C2a_02075	SR32_H3.C2b_02200	SR33_H3.C3a_02022	SR34_H3.C3b_02068	SR35_H3.C3c_02236	SR36_H3.C4_02250	SR37_H3.C5_02072	SR38_H3.C6a_02067	SR39_H3.C6b_02008		SR40_H3.C7a_02250	SR41_H3.C7b_02011	SR42_H3.C8a_02316
group_725		helix-turn-helix domain-containing protein	40	40	1	69	237	69	46		731	731	731																			SR27_H3.C1a_02071	SR28_H3.C1b_02072	SR29_H3.C1c_02073		SR30_H3.C1d_02247	SR31_H3.C2a_02076	SR32_H3.C2b_02201	SR33_H3.C3a_02023	SR34_H3.C3b_02069	SR35_H3.C3c_02237	SR36_H3.C4_02249	SR37_H3.C5_02073	SR38_H3.C6a_02068	SR39_H3.C6b_02007		SR40_H3.C7a_02249	SR41_H3.C7b_02010	SR42_H3.C8a_02317
group_111		hypothetical protein	39	39	1	69	224	69	267		1949	1949	1949																			SR27_H3.C1a_02059	SR28_H3.C1b_02060	SR29_H3.C1c_02061		SR30_H3.C1d_02235	SR31_H3.C2a_02064	SR32_H3.C2b_02189	SR33_H3.C3a_02011	SR34_H3.C3b_02057	SR35_H3.C3c_02225	SR36_H3.C4_02261	SR37_H3.C5_02061	SR38_H3.C6a_02056	SR39_H3.C6b_02019		SR40_H3.C7a_02043	SR41_H3.C7b_02022	SR42_H3.C8a_02098
group_1		hypothetical protein	38	38	1	69	242	69	11		386	6482	3563	SR10_H1.C6a_00642	SR11_H1.C6b_00792	SR12_H1.C7a_00794	SR13_H1.C7b_00530	SR14_H1.C7c_00794	SR15_H1.C8_00793	SR16_H1.C9a_00796	SR17_H1.C9b_00642	SR18_H1.C10_00794	SR19_H1.C11_00793	SR1_H1.C1a_00793	SR20_H1.C12_00529	SR21_H1.C13_00794	SR22_H1.C14_00794	SR23_H1.C15a_00794	SR24_H1.C15b_00529	SR25_H1.C16_00794	SR26_H2.C1_01530				SR2_H1.C1b_00642											SR3_H1.C2_00529
group_706		hypothetical protein	38	38	1	69	207	69	236		206	206	206																			SR27_H3.C1a_02047	SR28_H3.C1b_02048	SR29_H3.C1c_02049		SR30_H3.C1d_02223	SR31_H3.C2a_02052	SR32_H3.C2b_02177	SR33_H3.C3a_01999	SR34_H3.C3b_02045	SR35_H3.C3c_02213	SR36_H3.C4_02273	SR37_H3.C5_02049	SR38_H3.C6a_02044	SR39_H3.C6b_02031		SR40_H3.C7a_02055	SR41_H3.C7b_02034	SR42_H3.C8a_02110
group_717		hypothetical protein	38	38	1	69	229	69	55		470	470	470																			SR27_H3.C1a_02063	SR28_H3.C1b_02064	SR29_H3.C1c_02065		SR30_H3.C1d_02239	SR31_H3.C2a_02068	SR32_H3.C2b_02193	SR33_H3.C3a_02015	SR34_H3.C3b_02061	SR35_H3.C3c_02229	SR36_H3.C4_02257	SR37_H3.C5_02065	SR38_H3.C6a_02060	SR39_H3.C6b_02015			SR41_H3.C7b_02018
group_697		HK97 gp10 family phage protein	36	36	1	69	182	69	210		413	413	413																			SR27_H3.C1a_02029	SR28_H3.C1b_02030	SR29_H3.C1c_02031		SR30_H3.C1d_02118	SR31_H3.C2a_02034	SR32_H3.C2b_02071	SR33_H3.C3a_01981	SR34_H3.C3b_02027	SR35_H3.C3c_02107	SR36_H3.C4_02035	SR37_H3.C5_02031	SR38_H3.C6a_02026	SR39_H3.C6b_02049		SR40_H3.C7a_02073	SR41_H3.C7b_02052	SR42_H3.C8a_02128
group_257		YopX family protein	34	34	1	69	136	69	166		341	407	393	SR10_H1.C6a_01918		SR12_H1.C7a_01915	SR13_H1.C7b_00939	SR14_H1.C7c_01921	SR15_H1.C8_00937	SR16_H1.C9a_01054	SR17_H1.C9b_01025	SR18_H1.C10_01052	SR19_H1.C11_01051		SR20_H1.C12_01920	SR21_H1.C13_01026	SR22_H1.C14_00938	SR23_H1.C15a_01920	SR24_H1.C15b_00939	SR25_H1.C16_01052					SR2_H1.C1b_01051											SR3_H1.C2_00939
group_726		type II toxin-antitoxin system PemK/MazF family toxin	34	34	1	69	238	69	45		716	716	716																			SR27_H3.C1a_02072	SR28_H3.C1b_02073	SR29_H3.C1c_02074		SR30_H3.C1d_02248	SR31_H3.C2a_02077	SR32_H3.C2b_02202	SR33_H3.C3a_02024	SR34_H3.C3b_02070	SR35_H3.C3c_02238		SR37_H3.C5_02074	SR38_H3.C6a_02069	SR39_H3.C6b_02006			SR41_H3.C7b_02009
bioB_1		biotin synthase BioB	33	33	1	69	264	69	28		425	989	561																			SR27_H3.C1a_00018	SR28_H3.C1b_00018	SR29_H3.C1c_00018		SR30_H3.C1d_00402	SR31_H3.C2a_00404	SR32_H3.C2b_00403	SR33_H3.C3a_00018	SR34_H3.C3b_00018	SR35_H3.C3c_00018	SR36_H3.C4_00404	SR37_H3.C5_00018	SR38_H3.C6a_00018	SR39_H3.C6b_00018		SR40_H3.C7a_01506	SR41_H3.C7b_00018	SR42_H3.C8a_01427
group_270		MetQ/NlpA family ABC transporter substrate-binding protein	33	33	1	69	263	69	29		98	818	643																			SR27_H3.C1a_00021	SR28_H3.C1b_00021	SR29_H3.C1c_00021		SR30_H3.C1d_00399	SR31_H3.C2a_00401	SR32_H3.C2b_00400	SR33_H3.C3a_00021	SR34_H3.C3b_00021	SR35_H3.C3c_00021	SR36_H3.C4_00401	SR37_H3.C5_00021	SR38_H3.C6a_00021	SR39_H3.C6b_00021		SR40_H3.C7a_01503	SR41_H3.C7b_00021	SR42_H3.C8a_01430
group_663		hypothetical protein	33	33	1	69	85	69	119		203	203	203																		SR26_H2.C1_00697	SR27_H3.C1a_02277	SR28_H3.C1b_02278	SR29_H3.C1c_02277		SR30_H3.C1d_02273	SR31_H3.C2a_02276			SR34_H3.C3b_02275	SR35_H3.C3c_02267		SR37_H3.C5_02279	SR38_H3.C6a_02274	SR39_H3.C6b_02275		SR40_H3.C7a_02244	SR41_H3.C7b_02277	SR42_H3.C8a_02308
group_665		hypothetical protein	33	33	1	69	83	69	117		503	503	503																		SR26_H2.C1_00699	SR27_H3.C1a_02279	SR28_H3.C1b_02280	SR29_H3.C1c_02275		SR30_H3.C1d_02275	SR31_H3.C2a_02278			SR34_H3.C3b_02277	SR35_H3.C3c_02265		SR37_H3.C5_02281	SR38_H3.C6a_02276	SR39_H3.C6b_02277		SR40_H3.C7a_02246	SR41_H3.C7b_02279	SR42_H3.C8a_02306
group_667		hypothetical protein	33	33	1	69	81	69	115		107	107	107																		SR26_H2.C1_00701	SR27_H3.C1a_02281	SR28_H3.C1b_02282	SR29_H3.C1c_02273		SR30_H3.C1d_02277	SR31_H3.C2a_02280			SR34_H3.C3b_02279	SR35_H3.C3c_02263		SR37_H3.C5_02283	SR38_H3.C6a_02278	SR39_H3.C6b_02279		SR40_H3.C7a_02248	SR41_H3.C7b_02281	SR42_H3.C8a_02304
group_451		hypothetical protein	32	32	1	66	10	66	11		1154	1352	1302																			SR27_H3.C1a_00850	SR28_H3.C1b_00737	SR29_H3.C1c_01077		SR30_H3.C1d_00736	SR31_H3.C2a_00851	SR32_H3.C2b_01154	SR33_H3.C3a_01045	SR34_H3.C3b_00849	SR35_H3.C3c_00850	SR36_H3.C4_01271	SR37_H3.C5_00738	SR38_H3.C6a_00849	SR39_H3.C6b_00849		SR40_H3.C7a_00621	SR41_H3.C7b_00962	SR42_H3.C8a_00621
group_662		VRR-NUC domain-containing protein	32	32	1	69	86	69	120		308	308	308																		SR26_H2.C1_00696	SR27_H3.C1a_02276	SR28_H3.C1b_02277	SR29_H3.C1c_02278		SR30_H3.C1d_02272	SR31_H3.C2a_02275			SR34_H3.C3b_02274	SR35_H3.C3c_02268		SR37_H3.C5_02278	SR38_H3.C6a_02273	SR39_H3.C6b_02274		SR40_H3.C7a_02243	SR41_H3.C7b_02276	SR42_H3.C8a_02309
group_664		hypothetical protein	32	32	1	69	84	69	118		2306	2306	2306																		SR26_H2.C1_00698	SR27_H3.C1a_02278	SR28_H3.C1b_02279	SR29_H3.C1c_02276		SR30_H3.C1d_02274	SR31_H3.C2a_02277			SR34_H3.C3b_02276	SR35_H3.C3c_02266		SR37_H3.C5_02280	SR38_H3.C6a_02275	SR39_H3.C6b_02276		SR40_H3.C7a_02245	SR41_H3.C7b_02278	SR42_H3.C8a_02307
radD_1		Putative DNA repair helicase RadD	32	32	1	69	82	69	116		1220	1220	1220																		SR26_H2.C1_00700	SR27_H3.C1a_02280	SR28_H3.C1b_02281	SR29_H3.C1c_02274		SR30_H3.C1d_02276	SR31_H3.C2a_02279			SR34_H3.C3b_02278	SR35_H3.C3c_02264		SR37_H3.C5_02282	SR38_H3.C6a_02277	SR39_H3.C6b_02278		SR40_H3.C7a_02247	SR41_H3.C7b_02280	SR42_H3.C8a_02305
group_669		hypothetical protein	31	31	1	69	102	69	138		116	116	116																		SR26_H2.C1_00707	SR27_H3.C1a_01624	SR28_H3.C1b_01625	SR29_H3.C1c_01577		SR30_H3.C1d_01623	SR31_H3.C2a_01628			SR34_H3.C3b_01531	SR35_H3.C3c_01624		SR37_H3.C5_01534	SR38_H3.C6a_01622	SR39_H3.C6b_01621		SR40_H3.C7a_01525	SR41_H3.C7b_01575	SR42_H3.C8a_01525
group_732		hypothetical protein	31	31	1	69	58	69	152		143	143	143																			SR27_H3.C1a_02289	SR28_H3.C1b_02290	SR29_H3.C1c_02292		SR30_H3.C1d_02285	SR31_H3.C2a_02288		SR33_H3.C3a_02239	SR34_H3.C3b_02287	SR35_H3.C3c_02275			SR38_H3.C6a_02286	SR39_H3.C6b_02287		SR40_H3.C7a_02265	SR41_H3.C7b_02289	SR42_H3.C8a_02324
group_709		hypothetical protein	30	30	1	69	217	69	259		767	767	767																			SR27_H3.C1a_02052	SR28_H3.C1b_02053	SR29_H3.C1c_02054		SR30_H3.C1d_02228	SR31_H3.C2a_02057	SR32_H3.C2b_02182	SR33_H3.C3a_02004	SR34_H3.C3b_02050	SR35_H3.C3c_02218	SR36_H3.C4_02268	SR37_H3.C5_02054	SR38_H3.C6a_02049	SR39_H3.C6b_02026		SR40_H3.C7a_02050	SR41_H3.C7b_02029	SR42_H3.C8a_02105
group_710		hypothetical protein	30	30	1	69	218	69	260		434	434	434																			SR27_H3.C1a_02053	SR28_H3.C1b_02054	SR29_H3.C1c_02055		SR30_H3.C1d_02229	SR31_H3.C2a_02058	SR32_H3.C2b_02183	SR33_H3.C3a_02005	SR34_H3.C3b_02051	SR35_H3.C3c_02219	SR36_H3.C4_02267	SR37_H3.C5_02055	SR38_H3.C6a_02050	SR39_H3.C6b_02025		SR40_H3.C7a_02049	SR41_H3.C7b_02028	SR42_H3.C8a_02104
group_711		hypothetical protein	30	30	1	69	219	69	261		323	323	323																			SR27_H3.C1a_02054	SR28_H3.C1b_02055	SR29_H3.C1c_02056		SR30_H3.C1d_02230	SR31_H3.C2a_02059	SR32_H3.C2b_02184	SR33_H3.C3a_02006	SR34_H3.C3b_02052	SR35_H3.C3c_02220	SR36_H3.C4_02266	SR37_H3.C5_02056	SR38_H3.C6a_02051	SR39_H3.C6b_02024		SR40_H3.C7a_02048	SR41_H3.C7b_02027	SR42_H3.C8a_02103
group_714		hypothetical protein	30	30	1	69	223	69	265		206	206	206																			SR27_H3.C1a_02058	SR28_H3.C1b_02059	SR29_H3.C1c_02060		SR30_H3.C1d_02234	SR31_H3.C2a_02063	SR32_H3.C2b_02188	SR33_H3.C3a_02010	SR34_H3.C3b_02056	SR35_H3.C3c_02224	SR36_H3.C4_02262	SR37_H3.C5_02060	SR38_H3.C6a_02055	SR39_H3.C6b_02020		SR40_H3.C7a_02044	SR41_H3.C7b_02023	SR42_H3.C8a_02099
group_463		hypothetical protein	29	29	1	69	221	69	263		578	590	578																			SR27_H3.C1a_02056	SR28_H3.C1b_02057	SR29_H3.C1c_02058		SR30_H3.C1d_02232	SR31_H3.C2a_02061	SR32_H3.C2b_02186	SR33_H3.C3a_02008	SR34_H3.C3b_02054	SR35_H3.C3c_02222	SR36_H3.C4_02264	SR37_H3.C5_02058	SR38_H3.C6a_02053	SR39_H3.C6b_02022		SR40_H3.C7a_02046	SR41_H3.C7b_02025	SR42_H3.C8a_02101
ssb_2		single-stranded DNA-binding protein	29	29	1	69	220	69	262		440	440	440																			SR27_H3.C1a_02055	SR28_H3.C1b_02056	SR29_H3.C1c_02057		SR30_H3.C1d_02231	SR31_H3.C2a_02060	SR32_H3.C2b_02185	SR33_H3.C3a_02007	SR34_H3.C3b_02053	SR35_H3.C3c_02221	SR36_H3.C4_02265	SR37_H3.C5_02057	SR38_H3.C6a_02052	SR39_H3.C6b_02023		SR40_H3.C7a_02047	SR41_H3.C7b_02026	SR42_H3.C8a_02102
group_115		hypothetical protein	28	28	1	69	225	69	268		278	2219	416																			SR27_H3.C1a_02060	SR28_H3.C1b_02061	SR29_H3.C1c_02062		SR30_H3.C1d_02236	SR31_H3.C2a_02065	SR32_H3.C2b_02190	SR33_H3.C3a_02012	SR34_H3.C3b_02058	SR35_H3.C3c_02226	SR36_H3.C4_02260	SR37_H3.C5_02062	SR38_H3.C6a_02057	SR39_H3.C6b_02018			SR41_H3.C7b_02021
group_713		hypothetical protein	28	28	1	69	222	69	264		716	716	716																			SR27_H3.C1a_02057	SR28_H3.C1b_02058	SR29_H3.C1c_02059		SR30_H3.C1d_02233	SR31_H3.C2a_02062	SR32_H3.C2b_02187	SR33_H3.C3a_02009	SR34_H3.C3b_02055	SR35_H3.C3c_02223	SR36_H3.C4_02263	SR37_H3.C5_02059	SR38_H3.C6a_02054	SR39_H3.C6b_02021		SR40_H3.C7a_02045	SR41_H3.C7b_02024	SR42_H3.C8a_02100
group_132		aquaporin family protein	27	27	1	58	1	58	2	Investigate	257	257	257																			SR27_H3.C1a_01966	SR28_H3.C1b_01902	SR29_H3.C1c_01945		SR30_H3.C1d_01900	SR31_H3.C2a_01971	SR32_H3.C2b_01893	SR33_H3.C3a_01854	SR34_H3.C3b_01964	SR35_H3.C3c_01901	SR36_H3.C4_01900	SR37_H3.C5_01903	SR38_H3.C6a_01963	SR39_H3.C6b_01898		SR40_H3.C7a_01893	SR41_H3.C7b_01943	SR42_H3.C8a_01895
group_26		hypothetical protein	27	27	1	69	73	69	126		548	2036	1925	SR10_H1.C6a_01555	SR11_H1.C6b_01176	SR12_H1.C7a_01556	SR13_H1.C7b_00797	SR14_H1.C7c_01661	SR15_H1.C8_00796	SR16_H1.C9a_00912	SR17_H1.C9b_01167	SR18_H1.C10_00910	SR19_H1.C11_00909	SR1_H1.C1a_00989	SR20_H1.C12_01556	SR21_H1.C13_01168	SR22_H1.C14_00797	SR23_H1.C15a_01599	SR24_H1.C15b_00797	SR25_H1.C16_00910					SR2_H1.C1b_00908											SR3_H1.C2_00797
group_50		ABC transporter permease	27	27	1	65	1	65	10		476	1907	1818	SR10_H1.C6a_02168	SR11_H1.C6b_02129	SR12_H1.C7a_02176	SR13_H1.C7b_02178	SR14_H1.C7c_02164	SR15_H1.C8_02167	SR16_H1.C9a_02140	SR17_H1.C9b_02142	SR18_H1.C10_02163	SR19_H1.C11_02184	SR1_H1.C1a_02094	SR20_H1.C12_02177	SR21_H1.C13_02177	SR22_H1.C14_02170	SR23_H1.C15a_02195	SR24_H1.C15b_02236	SR25_H1.C16_02236					SR2_H1.C1b_02186											SR3_H1.C2_02143
group_660		hypothetical protein	27	27	1	69	89	69	124		146	146	146																		SR26_H2.C1_00683	SR27_H3.C1a_01522	SR28_H3.C1b_01523	SR29_H3.C1c_01567		SR30_H3.C1d_01521	SR31_H3.C2a_01525			SR34_H3.C3b_01521	SR35_H3.C3c_01522		SR37_H3.C5_01524	SR38_H3.C6a_01520	SR39_H3.C6b_01389		SR40_H3.C7a_01272	SR41_H3.C7b_01565	SR42_H3.C8a_01272
group_707		hypothetical protein	27	27	1	69	209	69	256		206	206	206																			SR27_H3.C1a_02049	SR28_H3.C1b_02050	SR29_H3.C1c_02051		SR30_H3.C1d_02225	SR31_H3.C2a_02054	SR32_H3.C2b_02179	SR33_H3.C3a_02001	SR34_H3.C3b_02047	SR35_H3.C3c_02215	SR36_H3.C4_02271	SR37_H3.C5_02051	SR38_H3.C6a_02046	SR39_H3.C6b_02029		SR40_H3.C7a_02053	SR41_H3.C7b_02032	SR42_H3.C8a_02108
group_708		hypothetical protein	27	27	1	69	210	69	257		170	170	170																			SR27_H3.C1a_02050	SR28_H3.C1b_02051	SR29_H3.C1c_02052		SR30_H3.C1d_02226	SR31_H3.C2a_02055	SR32_H3.C2b_02180	SR33_H3.C3a_02002	SR34_H3.C3b_02048	SR35_H3.C3c_02216	SR36_H3.C4_02270	SR37_H3.C5_02052	SR38_H3.C6a_02047	SR39_H3.C6b_02028		SR40_H3.C7a_02052	SR41_H3.C7b_02031	SR42_H3.C8a_02107
group_272		L-cystine transporter	26	26	1	69	262	69	31		416	1391	453																		SR26_H2.C1_01238	SR27_H3.C1a_00027	SR28_H3.C1b_00027	SR29_H3.C1c_00027		SR30_H3.C1d_00393	SR31_H3.C2a_00395	SR32_H3.C2b_00394	SR33_H3.C3a_00027	SR34_H3.C3b_00027	SR35_H3.C3c_00027	SR36_H3.C4_00395	SR37_H3.C5_00027	SR38_H3.C6a_00027	SR39_H3.C6b_00027		SR40_H3.C7a_01497	SR41_H3.C7b_00027	SR42_H3.C8a_01436
group_274		hypothetical protein	26	26	1	69	261	69	32		239	674	657																		SR26_H2.C1_01233	SR27_H3.C1a_00032	SR28_H3.C1b_00032	SR29_H3.C1c_00032		SR30_H3.C1d_00388	SR31_H3.C2a_00390	SR32_H3.C2b_00389	SR33_H3.C3a_00032	SR34_H3.C3b_00032	SR35_H3.C3c_00032	SR36_H3.C4_00390	SR37_H3.C5_00032	SR38_H3.C6a_00032	SR39_H3.C6b_00032		SR40_H3.C7a_01492	SR41_H3.C7b_00032	SR42_H3.C8a_01441
group_76		helix-turn-helix domain-containing protein	26	26	1	68	22	68	8		1169	2039	1246	SR10_H1.C6a_01169	SR11_H1.C6b_01274	SR12_H1.C7a_01195	SR13_H1.C7b_01346	SR14_H1.C7c_01058	SR15_H1.C8_01318	SR16_H1.C9a_01284	SR17_H1.C9b_01433	SR18_H1.C10_01458	SR19_H1.C11_01458	SR1_H1.C1a_01276	SR20_H1.C12_01082	SR21_H1.C13_01459	SR22_H1.C14_01319	SR23_H1.C15a_00906	SR24_H1.C15b_01320	SR25_H1.C16_01432	SR26_H2.C1_01459				SR2_H1.C1b_01457											SR3_H1.C2_01344
arsB_1		arsenite efflux transporter membrane subunit ArsB	25	25	1	69	240	69	43		464	464	464																			SR27_H3.C1a_00419	SR28_H3.C1b_00419	SR29_H3.C1c_00421		SR30_H3.C1d_00001	SR31_H3.C2a_00002	SR32_H3.C2b_00002	SR33_H3.C3a_00421	SR34_H3.C3b_00419	SR35_H3.C3c_00419	SR36_H3.C4_00002	SR37_H3.C5_00419	SR38_H3.C6a_00419	SR39_H3.C6b_00419		SR40_H3.C7a_00001	SR41_H3.C7b_00420	SR42_H3.C8a_00304
dprA_2		DNA-processing protein DprA	25	25	1	58	2	58	1	Investigate	221	221	221																			SR27_H3.C1a_01912	SR28_H3.C1b_01956	SR29_H3.C1c_01999		SR30_H3.C1d_01954	SR31_H3.C2a_01917	SR32_H3.C2b_01947	SR33_H3.C3a_01908	SR34_H3.C3b_01910	SR35_H3.C3c_01955	SR36_H3.C4_01954	SR37_H3.C5_01957	SR38_H3.C6a_01909	SR39_H3.C6b_01952		SR40_H3.C7a_01947	SR41_H3.C7b_01997	SR42_H3.C8a_01949
group_145		RDD family protein	25	25	1	69	155	69	179		266	266	266	SR10_H1.C6a_00426	SR11_H1.C6b_00426	SR12_H1.C7a_00103	SR13_H1.C7b_00103	SR14_H1.C7c_00426	SR15_H1.C8_00426	SR16_H1.C9a_00427	SR17_H1.C9b_00426	SR18_H1.C10_00426	SR19_H1.C11_00103	SR1_H1.C1a_00426	SR20_H1.C12_00426	SR21_H1.C13_00103	SR22_H1.C14_00103	SR23_H1.C15a_00426	SR24_H1.C15b_00103	SR25_H1.C16_00426					SR2_H1.C1b_00426											SR3_H1.C2_00103
group_192		Fic family protein	25	25	1	68	19	68	30		581	581	581	SR10_H1.C6a_01112	SR11_H1.C6b_01331	SR12_H1.C7a_01252	SR13_H1.C7b_01403	SR14_H1.C7c_01001	SR15_H1.C8_01261	SR16_H1.C9a_01227	SR17_H1.C9b_01376	SR18_H1.C10_01515	SR19_H1.C11_01515	SR1_H1.C1a_01333	SR20_H1.C12_01139	SR21_H1.C13_01516	SR22_H1.C14_01262	SR23_H1.C15a_00849	SR24_H1.C15b_01263	SR25_H1.C16_01375					SR2_H1.C1b_01514											SR3_H1.C2_01401
group_20		hypothetical protein	25	25	1	63	13	63	11		1211	2723	1953	SR10_H1.C6a_02120	SR11_H1.C6b_02057			SR14_H1.C7c_02116	SR15_H1.C8_02119	SR16_H1.C9a_02092			SR19_H1.C11_02112		SR20_H1.C12_02129		SR22_H1.C14_02122	SR23_H1.C15a_02123	SR24_H1.C15b_02165			SR27_H3.C1a_02182			SR2_H1.C1b_02090		SR31_H3.C2a_02181				SR35_H3.C3c_02141		SR37_H3.C5_02184	SR38_H3.C6a_02179	SR39_H3.C6b_02179	SR3_H1.C2_02095			SR42_H3.C8a_02210
group_205		AAA family ATPase	25	25	1	65	3	65	9		644	644	644																			SR27_H3.C1a_01863	SR28_H3.C1b_01842	SR29_H3.C1c_01907		SR30_H3.C1d_01840	SR31_H3.C2a_01846	SR32_H3.C2b_01834	SR33_H3.C3a_01795	SR34_H3.C3b_01840	SR35_H3.C3c_01841	SR36_H3.C4_01840	SR37_H3.C5_01844	SR38_H3.C6a_01860	SR39_H3.C6b_01838		SR40_H3.C7a_01834	SR41_H3.C7b_01884	SR42_H3.C8a_01857
group_222		M15 family metallopeptidase	25	25	1	61	4	61	7		176	176	176	SR10_H1.C6a_01496	SR11_H1.C6b_01553	SR12_H1.C7a_01476	SR13_H1.C7b_01627	SR14_H1.C7c_01364	SR15_H1.C8_01624	SR16_H1.C9a_01804	SR17_H1.C9b_01738	SR18_H1.C10_01760	SR19_H1.C11_01759	SR1_H1.C1a_01577	SR20_H1.C12_01362	SR21_H1.C13_01761	SR22_H1.C14_01625	SR23_H1.C15a_01405	SR24_H1.C15b_01645	SR25_H1.C16_01759					SR2_H1.C1b_01759											SR3_H1.C2_01624
group_244		tetratricopeptide repeat protein	25	25	1	69	125	69	94		377	377	377	SR10_H1.C6a_01829	SR11_H1.C6b_01061	SR12_H1.C7a_01830	SR13_H1.C7b_00982	SR14_H1.C7c_01832	SR15_H1.C8_00979	SR16_H1.C9a_01097	SR17_H1.C9b_00983	SR18_H1.C10_01094	SR19_H1.C11_01094	SR1_H1.C1a_01105	SR20_H1.C12_01831	SR21_H1.C13_00983	SR22_H1.C14_00980	SR23_H1.C15a_01874	SR24_H1.C15b_00981	SR25_H1.C16_01094					SR2_H1.C1b_01093											SR3_H1.C2_00982
ssb_1		single-stranded DNA-binding protein	25	25	1						260	398	392	SR10_H1.C6a_01933		SR12_H1.C7a_01900	SR13_H1.C7b_00954	SR14_H1.C7c_01936	SR15_H1.C8_00952	SR16_H1.C9a_01069	SR17_H1.C9b_01010	SR18_H1.C10_01066	SR19_H1.C11_01066		SR20_H1.C12_01935	SR21_H1.C13_01011	SR22_H1.C14_00953	SR23_H1.C15a_01935	SR24_H1.C15b_00954	SR25_H1.C16_01067					SR2_H1.C1b_01065										SR39_H3.C6b_02302	SR3_H1.C2_00954
group_415		hypothetical protein	25	25	1	69	104	69	143		269	623	608	SR10_H1.C6a_01934		SR12_H1.C7a_01899	SR13_H1.C7b_00955	SR14_H1.C7c_01937	SR15_H1.C8_00953	SR16_H1.C9a_01070	SR17_H1.C9b_01009	SR18_H1.C10_01067	SR19_H1.C11_01067		SR20_H1.C12_01936	SR21_H1.C13_01010	SR22_H1.C14_00954	SR23_H1.C15a_01936	SR24_H1.C15b_00955	SR25_H1.C16_01068					SR2_H1.C1b_01066											SR3_H1.C2_00955
group_557		hypothetical protein	25	25	1	69	131	69	109		158	158	158	SR10_H1.C6a_01900		SR12_H1.C7a_01933	SR13_H1.C7b_00921	SR14_H1.C7c_01903	SR15_H1.C8_00920	SR16_H1.C9a_01036	SR17_H1.C9b_01043	SR18_H1.C10_01034	SR19_H1.C11_01033		SR20_H1.C12_01902	SR21_H1.C13_01044	SR22_H1.C14_00921	SR23_H1.C15a_01903	SR24_H1.C15b_00921	SR25_H1.C16_01034					SR2_H1.C1b_01032											SR3_H1.C2_00921
group_685		NtaA/DmoA family FMN-dependent monooxygenase	25	25	1	66	11	66	10		1235	1235	1235																			SR27_H3.C1a_00797	SR28_H3.C1b_00790	SR29_H3.C1c_01024		SR30_H3.C1d_00789	SR31_H3.C2a_00798	SR32_H3.C2b_01207	SR33_H3.C3a_00992	SR34_H3.C3b_00796	SR35_H3.C3c_00797	SR36_H3.C4_01218	SR37_H3.C5_00791	SR38_H3.C6a_00796	SR39_H3.C6b_00796		SR40_H3.C7a_00674	SR41_H3.C7b_01015	SR42_H3.C8a_00674
group_72		2-dehydropantoate 2-reductase	25	25	1	69	246	69	16		485	485	485	SR10_H1.C6a_00541	SR11_H1.C6b_01732	SR12_H1.C7a_00895	SR13_H1.C7b_01806	SR14_H1.C7c_01454	SR15_H1.C8_01803	SR16_H1.C9a_00897	SR17_H1.C9b_00541	SR18_H1.C10_00895	SR19_H1.C11_00894	SR1_H1.C1a_01646	SR20_H1.C12_01541	SR21_H1.C13_00895	SR22_H1.C14_01804	SR23_H1.C15a_01584	SR24_H1.C15b_01804	SR25_H1.C16_00895					SR2_H1.C1b_00541											SR3_H1.C2_01714
thiC_1		phosphomethylpyrimidine synthase ThiC	25	25	1	69	142	69	189		707	707	707																			SR27_H3.C1a_00968	SR28_H3.C1b_00991	SR29_H3.C1c_01218		SR30_H3.C1d_00990	SR31_H3.C2a_00969	SR32_H3.C2b_01385	SR33_H3.C3a_01186	SR34_H3.C3b_00967	SR35_H3.C3c_00991	SR36_H3.C4_01412	SR37_H3.C5_00969	SR38_H3.C6a_00967	SR39_H3.C6b_00990		SR40_H3.C7a_00852	SR41_H3.C7b_01193	SR42_H3.C8a_00875
group_411		hypothetical protein	24	24	1	69	71	69	147		728	743	742	SR10_H1.C6a_01928		SR12_H1.C7a_01905	SR13_H1.C7b_00949	SR14_H1.C7c_01931	SR15_H1.C8_00947	SR16_H1.C9a_01064	SR17_H1.C9b_01015	SR18_H1.C10_01062	SR19_H1.C11_01061		SR20_H1.C12_01930	SR21_H1.C13_01016	SR22_H1.C14_00948	SR23_H1.C15a_01930	SR24_H1.C15b_00949	SR25_H1.C16_01062					SR2_H1.C1b_01061											SR3_H1.C2_00949
group_413		hypothetical protein	24	24	1	69	70	69	146		311	590	578	SR10_H1.C6a_01931		SR12_H1.C7a_01902	SR13_H1.C7b_00952	SR14_H1.C7c_01934	SR15_H1.C8_00950	SR16_H1.C9a_01067	SR17_H1.C9b_01012	SR18_H1.C10_01064	SR19_H1.C11_01064		SR20_H1.C12_01933	SR21_H1.C13_01013	SR22_H1.C14_00951	SR23_H1.C15a_01933	SR24_H1.C15b_00952	SR25_H1.C16_01065					SR2_H1.C1b_01063											SR3_H1.C2_00952
group_544		hypothetical protein	24	24	1	69	128	69	112		425	425	425	SR10_H1.C6a_01883		SR12_H1.C7a_01950	SR13_H1.C7b_00904	SR14_H1.C7c_01886	SR15_H1.C8_00903	SR16_H1.C9a_01019	SR17_H1.C9b_01060	SR18_H1.C10_01017	SR19_H1.C11_01016		SR20_H1.C12_01885	SR21_H1.C13_01061	SR22_H1.C14_00904	SR23_H1.C15a_01886	SR24_H1.C15b_00904	SR25_H1.C16_01017					SR2_H1.C1b_01015											SR3_H1.C2_00904
group_577		hypothetical protein	24	24	1	69	107	69	140		305	305	305	SR10_H1.C6a_01939		SR12_H1.C7a_01894	SR13_H1.C7b_00960	SR14_H1.C7c_01942	SR15_H1.C8_00958	SR16_H1.C9a_01075	SR17_H1.C9b_01004	SR18_H1.C10_01072	SR19_H1.C11_01072		SR20_H1.C12_01941	SR21_H1.C13_01005	SR22_H1.C14_00959	SR23_H1.C15a_01941	SR24_H1.C15b_00960	SR25_H1.C16_01073					SR2_H1.C1b_01071											SR3_H1.C2_00960
group_686		hypothetical protein	24	24	1	68	10	68	20		1634	1634	1634																			SR27_H3.C1a_01995	SR28_H3.C1b_01981	SR29_H3.C1c_00727		SR30_H3.C1d_01994	SR31_H3.C2a_02000	SR32_H3.C2b_00891	SR33_H3.C3a_01948	SR34_H3.C3b_01993	SR35_H3.C3c_01995	SR36_H3.C4_00894	SR37_H3.C5_01997	SR38_H3.C6a_01992	SR39_H3.C6b_01992			SR41_H3.C7b_00893	SR42_H3.C8a_01989
group_253		terminase large subunit	23	23	1	69	133	69	108		902	1703	1633	SR10_H1.C6a_01905		SR12_H1.C7a_01928	SR13_H1.C7b_00926	SR14_H1.C7c_01908	SR15_H1.C8_00925	SR16_H1.C9a_01041	SR17_H1.C9b_01038	SR18_H1.C10_01039	SR19_H1.C11_01038		SR20_H1.C12_01907	SR21_H1.C13_01039	SR22_H1.C14_00926	SR23_H1.C15a_01908	SR24_H1.C15b_00926	SR25_H1.C16_01039					SR2_H1.C1b_01037											SR3_H1.C2_00926
group_545		hypothetical protein	23	23	1	69	129	69	111		311	311	311	SR10_H1.C6a_01884		SR12_H1.C7a_01949	SR13_H1.C7b_00905	SR14_H1.C7c_01887	SR15_H1.C8_00904	SR16_H1.C9a_01020	SR17_H1.C9b_01059	SR18_H1.C10_01018	SR19_H1.C11_01017		SR20_H1.C12_01886	SR21_H1.C13_01060	SR22_H1.C14_00905	SR23_H1.C15a_01887	SR24_H1.C15b_00905	SR25_H1.C16_01018					SR2_H1.C1b_01016											SR3_H1.C2_00905
group_546		hypothetical protein	23	23	1	69	130	69	110		506	506	506	SR10_H1.C6a_01885		SR12_H1.C7a_01948	SR13_H1.C7b_00906	SR14_H1.C7c_01888	SR15_H1.C8_00905	SR16_H1.C9a_01021	SR17_H1.C9b_01058	SR18_H1.C10_01019	SR19_H1.C11_01018		SR20_H1.C12_01887	SR21_H1.C13_01059	SR22_H1.C14_00906	SR23_H1.C15a_01888	SR24_H1.C15b_00906	SR25_H1.C16_01019					SR2_H1.C1b_01017											SR3_H1.C2_00906
group_564		hypothetical protein	23	23	1	69	134	69	164		146	146	146	SR10_H1.C6a_01911		SR12_H1.C7a_01922	SR13_H1.C7b_00932	SR14_H1.C7c_01914	SR15_H1.C8_00930	SR16_H1.C9a_01047	SR17_H1.C9b_01032	SR18_H1.C10_01045	SR19_H1.C11_01044		SR20_H1.C12_01913	SR21_H1.C13_01033	SR22_H1.C14_00931	SR23_H1.C15a_01913	SR24_H1.C15b_00932	SR25_H1.C16_01045					SR2_H1.C1b_01044											SR3_H1.C2_00932
group_571		VRR-NUC domain-containing protein	23	23	1	69	72	69	148		311	311	311	SR10_H1.C6a_01924		SR12_H1.C7a_01909	SR13_H1.C7b_00945	SR14_H1.C7c_01927	SR15_H1.C8_00943	SR16_H1.C9a_01060	SR17_H1.C9b_01019	SR18_H1.C10_01058	SR19_H1.C11_01057		SR20_H1.C12_01926	SR21_H1.C13_01020	SR22_H1.C14_00944	SR23_H1.C15a_01926	SR24_H1.C15b_00945	SR25_H1.C16_01058					SR2_H1.C1b_01057											SR3_H1.C2_00945
group_573		putative HNHc nuclease	23	23	1	69	69	69	145		665	665	665	SR10_H1.C6a_01932		SR12_H1.C7a_01901	SR13_H1.C7b_00953	SR14_H1.C7c_01935	SR15_H1.C8_00951	SR16_H1.C9a_01068	SR17_H1.C9b_01011	SR18_H1.C10_01065	SR19_H1.C11_01065		SR20_H1.C12_01934	SR21_H1.C13_01012	SR22_H1.C14_00952	SR23_H1.C15a_01934	SR24_H1.C15b_00953	SR25_H1.C16_01066					SR2_H1.C1b_01064											SR3_H1.C2_00953
group_574		siphovirus Gp157 family protein	23	23	1	69	105	69	142		485	485	485	SR10_H1.C6a_01935		SR12_H1.C7a_01898	SR13_H1.C7b_00956	SR14_H1.C7c_01938	SR15_H1.C8_00954	SR16_H1.C9a_01071	SR17_H1.C9b_01008	SR18_H1.C10_01068	SR19_H1.C11_01068		SR20_H1.C12_01937	SR21_H1.C13_01009	SR22_H1.C14_00955	SR23_H1.C15a_01937	SR24_H1.C15b_00956	SR25_H1.C16_01069					SR2_H1.C1b_01067											SR3_H1.C2_00956
group_575		hypothetical protein	23	23	1	69	106	69	141		185	185	185	SR10_H1.C6a_01936		SR12_H1.C7a_01897	SR13_H1.C7b_00957	SR14_H1.C7c_01939	SR15_H1.C8_00955	SR16_H1.C9a_01072	SR17_H1.C9b_01007	SR18_H1.C10_01069	SR19_H1.C11_01069		SR20_H1.C12_01938	SR21_H1.C13_01008	SR22_H1.C14_00956	SR23_H1.C15a_01938	SR24_H1.C15b_00957	SR25_H1.C16_01070					SR2_H1.C1b_01068											SR3_H1.C2_00957
group_7		MSCRAMM family adhesin	22	22	1	69	266	69	34		131	3047	2038	SR10_H1.C6a_02102	SR11_H1.C6b_02039	SR12_H1.C7a_02110	SR13_H1.C7b_02112	SR14_H1.C7c_02098	SR15_H1.C8_02101		SR17_H1.C9b_02071	SR18_H1.C10_02097	SR19_H1.C11_02070		SR20_H1.C12_02111	SR21_H1.C13_02087	SR22_H1.C14_02104	SR23_H1.C15a_02105	SR24_H1.C15b_02147	SR25_H1.C16_02146	SR26_H2.C1_01198			SR29_H3.C1c_00067			SR31_H3.C2a_00355
group_55		hypothetical protein	21	21	1	69	80	69	114	Hypothetical protein with no hits to refseq/uniprot/clusters/cdd/tigrfams/pfam overlapping another protein with hits	158	707	359																		SR26_H2.C1_00702	SR27_H3.C1a_02282	SR28_H3.C1b_02283	SR29_H3.C1c_02272		SR30_H3.C1d_02278	SR31_H3.C2a_02281			SR34_H3.C3b_02280	SR35_H3.C3c_02262		SR37_H3.C5_02284	SR38_H3.C6a_02279	SR39_H3.C6b_02280			SR41_H3.C7b_02282
group_51		IS1182 family transposase ISSep1	20	20	1	69	146	69	188		347	806	659			SR12_H1.C7a_02220					SR17_H1.C9b_02217		SR19_H1.C11_02216						SR24_H1.C15b_02258		SR26_H2.C1_02210															SR3_H1.C2_02186	SR40_H3.C7a_02288		SR42_H3.C8a_02352
group_12		hypothetical protein	16	16	1	69	90	69	106		1442	1838	1659		SR11_H1.C6b_01066									SR1_H1.C1a_01099
group_778		hypothetical protein	15	15	1	69	215	69	238		170	170	170
group_816		HK97 gp10 family phage protein	15	15	1	69	140	69	212		413	413	413
group_818		hypothetical protein	15	15	1	69	164	69	170		182	185	184
group_974		hypothetical protein	15	15	1	66	7	66	1		1448	1448	1448				SR13_H1.C7b_01098	SR14_H1.C7c_00835	SR15_H1.C8_01095	SR16_H1.C9a_01532		SR18_H1.C10_01210	SR19_H1.C11_01210		SR20_H1.C12_00946		SR22_H1.C14_01096		SR24_H1.C15b_01097	SR25_H1.C16_01210																SR3_H1.C2_01210
group_101		competence protein CoiA	14	14	1	57	1	57	1	Investigate	866	899	891
group_74		PTS sugar transporter subunit IIC	14	14	1	69	8	69	3		182	182	182
group_779		hypothetical protein	14	14	1	69	54	69	239		206	206	206
group_792		hypothetical protein	14	14	1	69	31	69	76		752	752	752
group_819		hypothetical protein	14	14	1	68	4	68	24		551	551	551
group_473		hypothetical protein	13	13	1	69	30	69	75		260	602	470
ssb_2		single-stranded DNA-binding protein	13	13	1	69	220	69	262		476	476	476
group_821		Crp/Fnr family transcriptional regulator	13	13	1	64	4	64	12		617	617	617
group_822		hypothetical protein	13	13	1	64	5	64	11		446	446	446
group_823		universal stress protein	13	13	1	64	6	64	10		188	188	188
group_827		hypothetical protein	13	13	1	64	10	64	6		524	524	524
group_828		SDR family oxidoreductase	13	13	1	64	11	64	5		737	737	737
group_829		oxidoreductase	13	13	1	64	12	64	4		971	971	971
group_832		hypothetical protein	13	13	1	64	1	64	1		437	437	437
group_833		hypothetical protein	13	13	1	62	1	62	6		1826	1826	1826
group_834		hypothetical protein	13	13	1	62	2	62	7		713	713	713
group_835		hypothetical protein	13	13	1	62	3	62	8		194	194	194
group_836		hypothetical protein	13	13	1	62	4	62	9		134	134	134
group_838		hypothetical protein	13	13	1	62	8	62	4		548	548	548
group_839		hypothetical protein	13	13	1	62	7	62	3		1493	1493	1493
group_840		hypothetical protein	13	13	1	62	6	62	2		221	221	221
group_841		hypothetical protein	13	13	1	62	5	62	1		149	149	149
group_842		IS6 family transposase IS431R	13	13	1	56	1	56	1	Investigate	674	674	674
hadL		(S)-2-haloacid dehalogenase	13	13	1	64	2	64	2		668	668	668
hxlA_2		3-hexulose-6-phosphate synthase	13	13	1	64	8	64	8		632	632	632
hxlB_2		6-phospho-3-hexuloisomerase	13	13	1	64	9	64	7		551	551	551
hxlR		HTH-type transcriptional activator HxlR	13	13	1	64	7	64	9		344	344	344
ohrR		Organic hydroperoxide resistance transcriptional regulator	13	13	1	64	3	64	3		419	419	419
xerD_2		site-specific tyrosine recombinase XerD	13	13	1	62	9	62	5		950	950	950
group_817		hypothetical protein	12	12	1	69	165	69	171		92	92	92
group_320		hypothetical protein	11	11	1	69	212	69	73		413	776	512
group_114		hypothetical protein	10	10	1	69	32	69	270		278	278	278
group_122		hypothetical protein	10	10	1	69	171	69	198		1265	1265	1265
group_14		hypothetical protein	10	10	1	69	124	69	92		1838	1838	1838				SR13_H1.C7b_00976			SR16_H1.C9a_01091		SR18_H1.C10_01088	SR19_H1.C11_01088			SR21_H1.C13_00989									SR2_H1.C1b_01087											SR3_H1.C2_00976
group_291		helix-turn-helix domain-containing protein	10	10	1	63	14	63	10		497	497	497																			SR27_H3.C1a_02181					SR31_H3.C2a_02180				SR35_H3.C3c_02140		SR37_H3.C5_02183	SR38_H3.C6a_02178	SR39_H3.C6b_02178				SR42_H3.C8a_02209
group_321		hypothetical protein	10	10	1	69	213	69	81		365	776	447
group_470		phage head morphogenesis protein	10	10	1	69	173	69	200		941	941	941
group_798		phage portal protein	10	10	1	69	172	69	199		1400	1400	1400
group_799		phage scaffolding protein	10	10	1	69	174	69	201		599	599	599
group_800		N4-gp56 family major capsid protein	10	10	1	69	175	69	202		830	830	830
group_801		hypothetical protein	10	10	1	69	176	69	203		281	281	281
group_802		phage head-tail connector protein	10	10	1	69	177	69	204		296	296	296
group_803		hypothetical protein	10	10	1	69	180	69	207		674	674	674
group_804		HK97 gp10 family phage protein	10	10	1	69	179	69	206		266	266	266
group_805		phage head-tail adapter protein	10	10	1	69	178	69	205		335	335	335
group_167		FusB/FusC family EF-G-binding protein	9	9	1	69	5	69	8		251	251	251
group_173		VOC family protein	9	9	1	69	4	69	7		95	767	692																		SR26_H2.C1_00852
group_177		AEC family transporter	9	9	1	69	2	69	5		296	914	845																		SR26_H2.C1_00844
group_279		putative DNA binding domain-containing protein	9	9	1	69	250	69	20		758	758	758	SR10_H1.C6a_01989				SR14_H1.C7c_01992								SR21_H1.C13_01991		SR23_H1.C15a_01991							SR2_H1.C1b_01994											SR3_H1.C2_01989
group_480		hypothetical protein	9	9	1	54	2	55	2	Investigate	206	320	218
cas9_2		type II CRISPR RNA-guided endonuclease Cas9	8	8	1	69	161	69	191		572	572	572
group_105		hypothetical protein	8	8	1	67	51	67	26		143	383	333																SR24_H1.C15b_01972	SR25_H1.C16_01971												SR36_H3.C4_01998			SR39_H3.C6b_02311				SR42_H3.C8a_02037
group_175		aminotransferase class I/II-fold pyridoxal phosphate-dependent enzyme	8	8	1	69	3	69	6		566	566	566
group_304		hypothetical protein	8	8	1	67	17	67	22		290	2192	1746																SR24_H1.C15b_01963	SR25_H1.C16_01962												SR36_H3.C4_02002							SR42_H3.C8a_02041
group_308		hypothetical protein	8	8	1	67	21	67	36		245	587	543																SR24_H1.C15b_02256	SR25_H1.C16_02256												SR36_H3.C4_01968							SR42_H3.C8a_02007
group_318		hypothetical protein	8	8	1	69	12	69	49		248	248	248
group_439		hypothetical protein	8	8	1	67	41	67	57		374	383	381																SR24_H1.C15b_01982	SR25_H1.C16_01981												SR36_H3.C4_01988							SR42_H3.C8a_02027
group_496		hypothetical protein	8	8	1	66	14	66	12		1406	1406	1406	SR10_H1.C6a_01058		SR12_H1.C7a_00948					SR17_H1.C9b_01322			SR1_H1.C1a_00946		SR21_H1.C13_01323		SR23_H1.C15a_01042							SR2_H1.C1b_01321
group_647		hypothetical protein	8	8	1	67	36	67	52		272	272	272																SR24_H1.C15b_01987	SR25_H1.C16_01986												SR36_H3.C4_01983							SR42_H3.C8a_02022
group_68		type II secretion system F family protein	8	8	1	69	147	69	184		242	242	242
clpE		ATP-dependent Clp protease ATP-binding subunit ClpE	7	7	1	67	3	67	11		920	1928	1784																SR24_H1.C15b_01954	SR25_H1.C16_01953												SR36_H3.C4_02012							SR42_H3.C8a_02051
group_218		YeeE/YedE family protein	7	7	1	61	6	61	3		182	1082	824																													SR36_H3.C4_01604
group_305		hypothetical protein	7	7	1	67	54	67	25		200	599	540																SR24_H1.C15b_01971	SR25_H1.C16_01970												SR36_H3.C4_01999							SR42_H3.C8a_02038
group_433		hypothetical protein	7	7	1	67	2	67	10		506	1214	1112																SR24_H1.C15b_01953	SR25_H1.C16_01952												SR36_H3.C4_02013							SR42_H3.C8a_02052
group_438		hypothetical protein	7	7	1	67	42	67	58		338	725	669																SR24_H1.C15b_01981	SR25_H1.C16_01980												SR36_H3.C4_01989							SR42_H3.C8a_02028
group_440		hypothetical protein	7	7	1	67	31	67	47		281	395	378																SR24_H1.C15b_01992	SR25_H1.C16_01991												SR36_H3.C4_01978							SR42_H3.C8a_02017
group_441		hypothetical protein	7	7	1	67	30	67	46		539	986	922																SR24_H1.C15b_01993	SR25_H1.C16_01992												SR36_H3.C4_01977							SR42_H3.C8a_02016
group_442		hypothetical protein	7	7	1	67	29	67	45		260	341	329																SR24_H1.C15b_01994	SR25_H1.C16_01993												SR36_H3.C4_01976							SR42_H3.C8a_02015
group_443		Y-family DNA polymerase	7	7	1	67	27	67	42		554	1259	1158																SR24_H1.C15b_01997	SR25_H1.C16_01996												SR36_H3.C4_01974							SR42_H3.C8a_02013
group_444		hypothetical protein	7	7	1	67	24	67	39		329	767	704																SR24_H1.C15b_02000	SR25_H1.C16_01999												SR36_H3.C4_01971							SR42_H3.C8a_02010
group_58		hypothetical protein	7	7	1	63	3	63	7		1166	2813	2444			SR12_H1.C7a_02129						SR18_H1.C10_02116																		SR34_H3.C3b_02181								SR41_H3.C7b_02183
group_628		hypothetical protein	7	7	1	67	15	67	20		293	293	293																SR24_H1.C15b_01961	SR25_H1.C16_01960												SR36_H3.C4_02004							SR42_H3.C8a_02043
group_629		hypothetical protein	7	7	1	67	16	67	21		224	224	224																SR24_H1.C15b_01962	SR25_H1.C16_01961												SR36_H3.C4_02003							SR42_H3.C8a_02042
group_638		hypothetical protein	7	7	1	67	48	67	29		593	593	593																SR24_H1.C15b_01975	SR25_H1.C16_01974												SR36_H3.C4_01995							SR42_H3.C8a_02034
group_642		hypothetical protein	7	7	1	67	43	67	59		320	320	320																SR24_H1.C15b_01980	SR25_H1.C16_01979												SR36_H3.C4_01990							SR42_H3.C8a_02029
group_646		hypothetical protein	7	7	1	67	37	67	53		287	287	287																SR24_H1.C15b_01986	SR25_H1.C16_01985												SR36_H3.C4_01984							SR42_H3.C8a_02023
group_649		hypothetical protein	7	7	1	67	34	67	50		425	425	425																SR24_H1.C15b_01989	SR25_H1.C16_01988												SR36_H3.C4_01981							SR42_H3.C8a_02020
group_652		hypothetical protein	7	7	1	67	26	67	41	Hypothetical protein with no hits to refseq/uniprot/clusters/cdd/tigrfams/pfam overlapping another protein with hits	167	167	167																SR24_H1.C15b_01998	SR25_H1.C16_01997												SR36_H3.C4_01973							SR42_H3.C8a_02012
group_656		hypothetical protein	7	7	1	67	19	67	34		959	959	959																SR24_H1.C15b_02254	SR25_H1.C16_02254												SR36_H3.C4_01966							SR42_H3.C8a_02005
group_84		hypothetical protein	7	7	1	61	7	61	6		155	989	393																													SR36_H3.C4_01601
group_19		hypothetical protein	6	6	1	63	5	63	8		1457	2723	2301			SR12_H1.C7a_02128						SR18_H1.C10_02115																		SR34_H3.C3b_02180								SR41_H3.C7b_02182
group_280		putative DNA binding domain-containing protein	6	6	1	69	251	69	18		758	758	758		SR11_H1.C6b_01883				SR15_H1.C8_01954			SR18_H1.C10_01955		SR1_H1.C1a_01890			SR22_H1.C14_01955
group_306		hypothetical protein	6	6	1	67	28	67	44		143	821	482																SR24_H1.C15b_01995	SR25_H1.C16_01994												SR36_H3.C4_01975							SR42_H3.C8a_02014
group_435		hypothetical protein	6	6	1	67	7	67	14		299	299	299																SR24_H1.C15b_01956	SR25_H1.C16_01955												SR36_H3.C4_02010							SR42_H3.C8a_02049
group_437		hypothetical protein	6	6	1	67	44	67	33		131	131	131																SR24_H1.C15b_01979	SR25_H1.C16_01978												SR36_H3.C4_01991							SR42_H3.C8a_02030
group_622		hypothetical protein	6	6	1	67	1	67	9		863	863	863																SR24_H1.C15b_01952	SR25_H1.C16_01951												SR36_H3.C4_02014							SR42_H3.C8a_02053
group_623		hypothetical protein	6	6	1	67	4	67	12		3305	3305	3305																SR24_H1.C15b_01955	SR25_H1.C16_01954												SR36_H3.C4_02011							SR42_H3.C8a_02050
group_630		hypothetical protein	6	6	1	67	59	67	23		881	881	881																SR24_H1.C15b_01964	SR25_H1.C16_01963												SR36_H3.C4_02001							SR42_H3.C8a_02040
group_631		hypothetical protein	6	6	1	67	58	67	24		2030	2030	2030																SR24_H1.C15b_01965	SR25_H1.C16_01964												SR36_H3.C4_02000							SR42_H3.C8a_02039
group_636		hypothetical protein	6	6	1	67	50	67	27		1316	1316	1316																SR24_H1.C15b_01973	SR25_H1.C16_01972												SR36_H3.C4_01997							SR42_H3.C8a_02036
group_637		hypothetical protein	6	6	1	67	49	67	28		536	536	536																SR24_H1.C15b_01974	SR25_H1.C16_01973												SR36_H3.C4_01996							SR42_H3.C8a_02035
group_639		hypothetical protein	6	6	1	67	47	67	30		356	356	356																SR24_H1.C15b_01976	SR25_H1.C16_01975												SR36_H3.C4_01994							SR42_H3.C8a_02033
group_640		hypothetical protein	6	6	1	67	46	67	31		278	278	278																SR24_H1.C15b_01977	SR25_H1.C16_01976												SR36_H3.C4_01993							SR42_H3.C8a_02032
group_641		hypothetical protein	6	6	1	67	45	67	32		812	812	812																SR24_H1.C15b_01978	SR25_H1.C16_01977												SR36_H3.C4_01992							SR42_H3.C8a_02031
group_643		hypothetical protein	6	6	1	67	40	67	56		2354	2354	2354																SR24_H1.C15b_01983	SR25_H1.C16_01982												SR36_H3.C4_01987							SR42_H3.C8a_02026
group_644		hypothetical protein	6	6	1	67	39	67	55		665	665	665																SR24_H1.C15b_01984	SR25_H1.C16_01983												SR36_H3.C4_01986							SR42_H3.C8a_02025
group_645		hypothetical protein	6	6	1	67	38	67	54		746	746	746																SR24_H1.C15b_01985	SR25_H1.C16_01984												SR36_H3.C4_01985							SR42_H3.C8a_02024
group_648		hypothetical protein	6	6	1	67	35	67	51		506	506	506																SR24_H1.C15b_01988	SR25_H1.C16_01987												SR36_H3.C4_01982							SR42_H3.C8a_02021
group_650		hypothetical protein	6	6	1	67	33	67	49		620	620	620																SR24_H1.C15b_01990	SR25_H1.C16_01989												SR36_H3.C4_01980							SR42_H3.C8a_02019
group_651		teicoplanin resistance protein VanZ	6	6	1	67	32	67	48		1337	1337	1337																SR24_H1.C15b_01991	SR25_H1.C16_01990												SR36_H3.C4_01979							SR42_H3.C8a_02018
group_653		hypothetical protein	6	6	1	67	25	67	40		263	263	263																SR24_H1.C15b_01999	SR25_H1.C16_01998												SR36_H3.C4_01972							SR42_H3.C8a_02011
group_654		hypothetical protein	6	6	1	67	23	67	38		182	182	182																SR24_H1.C15b_02001	SR25_H1.C16_02000												SR36_H3.C4_01970							SR42_H3.C8a_02009
group_655		hypothetical protein	6	6	1	67	22	67	37		401	401	401																SR24_H1.C15b_02002	SR25_H1.C16_02001												SR36_H3.C4_01969							SR42_H3.C8a_02008
group_657		hypothetical protein	6	6	1	67	20	67	35		428	428	428																SR24_H1.C15b_02255	SR25_H1.C16_02255												SR36_H3.C4_01967							SR42_H3.C8a_02006
group_292		helix-turn-helix domain-containing protein	5	5	1	63	6	63	4		497	497	497																					SR29_H3.C1c_02163					SR33_H3.C3a_02119			SR36_H3.C4_02163					SR40_H3.C7a_02134
group_466		hypothetical protein	5	5	1	67	10	67	17		1364	1490	1464																													SR36_H3.C4_02007							SR42_H3.C8a_02046
group_661		hypothetical protein	5	5	1	69	87	69	121		215	215	215																		SR26_H2.C1_00692																SR40_H3.C7a_02282		SR42_H3.C8a_02338
group_859		hypothetical protein	5	5	1	68	6	68	23		3986	3986	3986
group_18		hypothetical protein	4	4	1	63	9	63	1		1457	1457	1457				SR13_H1.C7b_02114													SR25_H1.C16_02148
group_289		helix-turn-helix domain-containing protein	4	4	1	63	4	63	6		497	497	497																											SR34_H3.C3b_02179								SR41_H3.C7b_02181
group_319		hypothetical protein	4	4	1	55	5	54	4		467	998	795																																		SR40_H3.C7a_02278
group_469		phage head morphogenesis protein	4	4	1	69	193	69	222		941	941	941
group_742		hypothetical protein	4	4	1	67	12	67	19		1154	1154	1154																													SR36_H3.C4_02005							SR42_H3.C8a_02044
group_743		hypothetical protein	4	4	1	67	11	67	18		503	503	503																													SR36_H3.C4_02006							SR42_H3.C8a_02045
group_744		hypothetical protein	4	4	1	67	9	67	16		569	569	569																													SR36_H3.C4_02008							SR42_H3.C8a_02047
group_745		hypothetical protein	4	4	1	67	8	67	15		896	896	896																													SR36_H3.C4_02009							SR42_H3.C8a_02048
group_746		SdpI family protein	4	4	1	55	1	54	5		335	335	335																													SR36_H3.C4_02298					SR40_H3.C7a_02276
group_747		hypothetical protein	4	4	1	55	2	54	3		182	182	182																													SR36_H3.C4_02299					SR40_H3.C7a_02277
group_754		hypothetical protein	4	4	1	66	4	66	7		188	188	188
group_772		phage portal protein	4	4	1	69	192	69	217		1397	1397	1397
deoB		Phosphopentomutase	3	3	1	48	1	49	1	Investigate	611	611	611																																		SR40_H3.C7a_02290		SR42_H3.C8a_02355
group_104		formate/nitrite transporter family protein	3	3	1	69	6	69	41		248	248	248
group_17		hypothetical protein	3	3	1	63	11	63	9		1457	2723	1879																				SR28_H3.C1b_02167
group_232		RNA-binding transcriptional accessory protein	3	3	1	59	3	59	4		1967	2153	2029
group_242		DEAD/DEAH box helicase family protein	3	3	1	69	114	69	83		365	365	365												SR20_H1.C12_01816			SR23_H1.C15a_01859
group_299		hypothetical protein	3	3	1	49	1	48	1	Investigate	596	662	618							SR16_H1.C9a_02193			SR19_H1.C11_02203
group_3		hypothetical protein	3	3	1	69	245	69	13		119	4166	2817
group_307		hypothetical protein	3	3	1	67	18	67	43		377	377	377																SR24_H1.C15b_01996	SR25_H1.C16_01995
group_36		hypothetical protein	3	3	1	69	150	69	175		551	551	551							SR16_H1.C9a_00450																							SR37_H3.C5_00617
group_477		hypothetical protein	3	3	1	68	11	68	21		914	1010	946
group_481		hypothetical protein	3	3	1	53	4	53	4		260	338	312
group_752		protein rep	3	3	1	45	1	46	2	Investigate	998	998	998																																			SR41_H3.C7b_02298
group_753		hypothetical protein	3	3	1	45	2	46	1	Investigate	344	344	344																																			SR41_H3.C7b_02299
group_787		hypothetical protein	3	3	1	69	188	69	218		350	350	350
group_788		hypothetical protein	3	3	1	69	189	69	219		149	149	149
group_789		hypothetical protein	3	3	1	69	190	69	220		914	914	914
group_790		hypothetical protein	3	3	1	69	191	69	221		584	584	584
group_794		hypothetical protein	3	3	1	69	170	69	165		146	146	146
panC_2		pantoate--beta-alanine ligase	3	3	1	69	248	69	15		362	788	504							SR16_H1.C9a_02194
cas10_1		type III-A CRISPR-associated protein Cas10/Csm1	2	2	1	68	1	68	13		212	212	212
group_10		hypothetical protein	2	2	1	69	122	69	90		1838	1838	1838	SR10_H1.C6a_01835				SR14_H1.C7c_01838
group_11		hypothetical protein	2	2	1	69	121	69	93		1838	1838	1838			SR12_H1.C7a_01836									SR20_H1.C12_01837
group_112		hypothetical protein	2	2	1	69	226	69	57		278	278	278																																		SR40_H3.C7a_02042		SR42_H3.C8a_02097
group_116		hypothetical protein	2	2	1	69	98	69	102		347	749	548
pepF_1		oligoendopeptidase F	2	2	1						368	368	368
ptsG		glucose-specific PTS transporter subunit IIBC	2	2	1						863	2036	1449				SR13_H1.C7b_00143
group_152		class I SAM-dependent methyltransferase	2	2	1	69	255	69	17		242	242	242
group_165		glycosyltransferase family 4 protein	2	2	1	69	9	69	2		395	395	395
group_194		hypothetical protein	2	2	1	68	2	68	33		245	245	245
group_211		YfhO family protein	2	2	1	65	9	65	4		974	974	974
group_226		ABC transporter ATP-binding protein/permease	2	2	1	61	5	61	1		560	560	560
group_231		MFS transporter	2	2	1	69	76	69	125		398	398	398
group_237		PH domain-containing protein	2	2	1	59	1	59	2		227	470	348
group_240		aminoacyltransferase	2	2	1	69	117	69	88		425	425	425
group_246		alpha/beta hydrolase	2	2	1	68	16	68	17		485	485	485
secA2_2		accessory Sec system translocase SecA2	2	2	1						317	317	317
group_278		putative DNA binding domain-containing protein	2	2	1	69	252	69	19		758	758	758																SR24_H1.C15b_02006	SR25_H1.C16_02005
group_287		alanine:cation symporter family protein	2	2	1	63	2	63	2		680	680	680
group_290		helix-turn-helix domain-containing protein	2	2	1	63	7	63	14		497	497	497																							SR30_H3.C1d_02136		SR32_H3.C2b_02090
group_297		bifunctional metallophosphatase/5'-nucleotidase	2	2	1	69	56	69	150		239	1520	879																		SR26_H2.C1_02174
cas9_2		type II CRISPR RNA-guided endonuclease Cas9	2	2	1	69	161	69	191		2588	2588	2588
group_402		N-acetylmuramoyl-L-alanine amidase	2	2	1	54	1	55	1	Investigate	884	884	884
group_432		hypothetical protein	2	2	1	41	1	42	1	Investigate	425	425	425					SR14_H1.C7c_02215				SR18_H1.C10_02206
group_436		hypothetical protein	2	2	1	67	52	67	2		287	293	290																SR24_H1.C15b_01969	SR25_H1.C16_01968
group_474		hypothetical protein	2	2	1	66	5	66	2		383	707	545
group_475		hypothetical protein	2	2	1	50	2	45	2		590	590	590
group_476		hypothetical protein	2	2	1	50	1	45	1		140	140	140
group_478		hypothetical protein	2	2	1	68	15	68	16		1175	1457	1316
group_54		MucBP domain-containing protein	2	2	1	61	1	61	2		4253	4253	4253
group_624		hypothetical protein	2	2	1	67	6	67	13		896	896	896																SR24_H1.C15b_01957	SR25_H1.C16_01956
group_625		hypothetical protein	2	2	1	67	5	67	6		581	581	581																SR24_H1.C15b_01958	SR25_H1.C16_01957
group_626		hypothetical protein	2	2	1	67	13	67	7		1490	1490	1490																SR24_H1.C15b_01959	SR25_H1.C16_01958
group_627		hypothetical protein	2	2	1	67	14	67	8		1817	1817	1817																SR24_H1.C15b_01960	SR25_H1.C16_01959
group_632		hypothetical protein	2	2	1	67	57	67	5		611	611	611																SR24_H1.C15b_01966	SR25_H1.C16_01965
group_633		hypothetical protein	2	2	1	67	56	67	4		242	242	242																SR24_H1.C15b_01967	SR25_H1.C16_01966
group_634		hypothetical protein	2	2	1	67	55	67	3		578	578	578																SR24_H1.C15b_01968	SR25_H1.C16_01967
group_635		hypothetical protein	2	2	1	67	53	67	1		266	266	266																SR24_H1.C15b_01970	SR25_H1.C16_01969
group_774		hypothetical protein	2	2	1	69	101	69	105		296	296	296
group_775		helix-turn-helix domain-containing protein	2	2	1	69	100	69	104		716	716	716
group_776		helix-turn-helix domain-containing protein	2	2	1	69	99	69	103		269	269	269
group_777		hypothetical protein	2	2	1	69	97	69	101		137	137	137
group_780		hypothetical protein	2	2	1	69	53	69	254		215	215	215
group_781		hypothetical protein	2	2	1	69	52	69	253		320	320	320
group_784		hypothetical protein	2	2	1	69	148	69	173		296	296	296
group_785		hypothetical protein	2	2	1	68	12	68	19		1016	1016	1016
group_786		CPBP family intramembrane metalloprotease	2	2	1	68	24	68	2		596	596	596
group_793		hypothetical protein	2	2	1	43	1	44	1	Investigate	1358	1358	1358
group_806		hypothetical protein	2	2	1	55	4	54	2		143	143	143
group_807		hypothetical protein	2	2	1	55	3	54	1		146	146	146
group_820		MSCRAMM family adhesin SdrC	2	2	1	68	5	68	25		278	278	278
group_853		phosphopentomutase	2	2	1	68	17	68	18		269	269	269
group_856		hypothetical protein	2	2	1	66	1	66	5		1268	1268	1268
group_857		hypothetical protein	2	2	1	44	1	43	1	Investigate	254	254	254
group_861		hypothetical protein	2	2	1	53	5	53	5		161	161	161
group_862		hypothetical protein	2	2	1	53	6	53	6		269	269	269
group_863		hypothetical protein	2	2	1	53	7	53	7		1109	1109	1109
group_866		hypothetical protein	2	2	1	68	9	68	28		782	782	782
group_868		hypothetical protein	2	2	1	52	1	52	4		341	341	341
group_869		hypothetical protein	2	2	1	52	2	52	3		515	515	515
group_870		hypothetical protein	2	2	1	52	3	52	2		137	137	137
group_871		hypothetical protein	2	2	1	52	4	52	1		407	407	407
group_95		glycosyltransferase family 2 protein	2	2	1	60	1	60	4		752	752	752
group_973		hypothetical protein	2	2	1	66	2	66	13		1388	1394	1391																		SR26_H2.C1_00504
group_98		hypothetical protein	2	2	1	69	247	69	14		125	125	125
lepB_3		signal peptidase I	2	2	1	65	8	65	2		164	164	164
linA		Lincosamide resistance protein	2	2	1	42	1	41	2	Investigate	485	485	485
aadK		Aminoglycoside 6-adenylyltransferase	1	1	1	51	5	51	5		848	848	848
abc-f_4		ABC-F type ribosomal protection protein	1	1	1	4	1	7	1	Investigate	317	317	317
bcp_1		thioredoxin-dependent thiol peroxidase	1	1	1	61	2	61	4		194	194	194
dgcC		putative diguanylate cyclase DgcC	1	1	1	26	1	23	1	Investigate	227	227	227							SR16_H1.C9a_02216
dut_1		Deoxyuridine 5'-triphosphate nucleotidohydrolase	1	1	1	69	50	69	251		515	515	515
gmpC_1		dipeptide ABC transporter glycylmethionine-binding lipoprotein	1	1	1	69	260	69	30		116	116	116																		SR26_H2.C1_01249
group_113		hypothetical protein	1	1	1	69	13	69	1		278	278	278
group_117		hypothetical protein	1	1	1	69	96	69	95		404	404	404
group_118		hypothetical protein	1	1	1	69	22	69	66		749	749	749
group_121		hypothetical protein	1	1	1	69	45	69	246		986	986	986
group_124		hypothetical protein	1	1	1	69	41	69	242		344	344	344
group_125		terminase	1	1	1	69	40	69	241		3230	3230	3230
group_13		hypothetical protein	1	1	1	69	123	69	91		1838	1838	1838															SR23_H1.C15a_01880
group_130		heavy metal translocating P-type ATPase	1	1	1	69	143	69	187		809	809	809
group_147		TSUP family transporter	1	1	1	69	151	69	180		353	353	353																													SR36_H3.C4_00523
group_155		phosphate--AMP phosphotransferase	1	1	1	69	270	69	12		275	275	275																SR24_H1.C15b_01717
group_163		sucrose-specific PTS transporter subunit IIBC	1	1	1	69	11	69	9		236	236	236
group_171		HTH domain-containing protein	1	1	1	69	7	69	10		233	233	233																SR24_H1.C15b_00666
group_178		DEAD/DEAH box helicase family protein	1	1	1	69	1	69	4		1754	1754	1754																		SR26_H2.C1_00793
group_185		nucleotidyltransferase	1	1	1	66	3	66	8		104	104	104		SR11_H1.C6b_00913
group_21		hypothetical protein	1	1	1	63	1	63	3		1457	1457	1457													SR21_H1.C13_02113
group_214		PLP-dependent aminotransferase family protein	1	1	1	65	5	65	5		635	635	635			SR12_H1.C7a_01267
group_215		PLP-dependent aminotransferase family protein	1	1	1	65	7	65	1		635	635	635					SR14_H1.C7c_01155
group_220		aldehyde dehydrogenase	1	1	1	61	9	61	9		605	605	605
group_224		lactose-specific PTS transporter subunit EIIC	1	1	1	61	3	61	5		797	797	797
group_228		NAD(P)/FAD-dependent oxidoreductase	1	1	1	69	74	69	127		446	446	446																		SR26_H2.C1_00591
group_235		PH domain-containing protein	1	1	1	59	2	59	5		296	296	296
group_252		phage portal protein	1	1	1	19	1	4	2	Investigate	392	392	392
group_255		terminase large subunit	1	1	1	69	132	69	107		821	821	821
group_276		putative DNA binding domain-containing protein	1	1	1	69	254	69	21		758	758	758							SR16_H1.C9a_01958
group_277		putative DNA binding domain-containing protein	1	1	1	69	253	69	22		758	758	758
group_283		AAA family ATPase	1	1	1	60	4	60	1		1949	1949	1949	SR10_H1.C6a_02073
group_285		hypothetical protein	1	1	1	40	1	32	1	Investigate	161	161	161							SR16_H1.C9a_02187
group_293		helix-turn-helix domain-containing protein	1	1	1	63	8	63	5		497	497	497
group_295		serine protease	1	1	1	69	55	69	149		389	389	389																		SR26_H2.C1_02176
group_301		hypothetical protein	1	1	1	33	1	30	1	Investigate	125	125	125
group_302		hypothetical protein	1	1	1	18	1	15	1	Investigate	125	125	125
group_303		hypothetical protein	1	1	1	24	1	16	1	Investigate	125	125	125												SR20_H1.C12_02229
group_405		HK97 family phage prohead protease	1	1	1	19	2	4	1	Investigate	584	584	584
group_47		phage tail tape measure protein	1	1	1	69	91	69	123		1034	1034	1034
group_48		phage tail tape measure protein	1	1	1	32	1	18	1	Investigate	1526	1526	1526
group_608		hypothetical protein	1	1	1	36	1	36	1	Investigate	116	116	116							SR16_H1.C9a_02212
group_610		protein rep	1	1	1	11	1	10	1	Investigate	200	200	200							SR16_H1.C9a_02219
group_611		hypothetical protein	1	1	1	41	2	42	2	Investigate	608	608	608									SR18_H1.C10_02207
group_612		hypothetical protein	1	1	1	22	1	8	1	Investigate	452	452	452									SR18_H1.C10_02215
group_613		aldehyde dehydrogenase family protein	1	1	1	5	1	39	1	Investigate	305	305	305									SR18_H1.C10_02220
group_616		hypothetical protein	1	1	1	31	1	1	1	Investigate	107	107	107									SR18_H1.C10_02226
group_617		hypothetical protein	1	1	1	30	1	31	1	Investigate	206	206	206									SR18_H1.C10_02230
group_618		hypothetical protein	1	1	1	15	1	13	1	Investigate	1832	1832	1832										SR19_H1.C11_01922
group_619		hypothetical protein	1	1	1	25	1	2	2	Investigate	548	548	548												SR20_H1.C12_02220
group_620		hypothetical protein	1	1	1	25	2	2	1	Investigate	164	164	164												SR20_H1.C12_02221
group_64		hypothetical protein	1	1	1	69	145	69	186		137	137	137														SR22_H1.C14_00512
group_66		hypothetical protein	1	1	1	69	144	69	183		224	224	224
group_670		hypothetical protein	1	1	1	69	267	69	35		1025	1025	1025																		SR26_H2.C1_01197
group_70		transcription antiterminator	1	1	1	69	154	69	178		287	287	287				SR13_H1.C7b_00142
group_741		hypothetical protein	1	1	1	69	141	69	169		593	593	593																												SR35_H3.C3c_02099
group_749		hypothetical protein	1	1	1	17	1	33	1	Investigate	206	206	206																														SR37_H3.C5_02311
group_750		hypothetical protein	1	1	1	7	1	24	1	Investigate	200	200	200																															SR38_H3.C6a_02309
group_751		hypothetical protein	1	1	1	9	1	22	1	Investigate	179	179	179																																SR39_H3.C6b_02314
group_755		hypothetical protein	1	1	1	34	1	14	1	Investigate	602	602	602
group_756		hypothetical protein	1	1	1	10	1	3	1	Investigate	164	164	164
group_757		hypothetical protein	1	1	1	69	88	69	122		416	416	416
group_758		hypothetical protein	1	1	1	37	1	28	1	Investigate	404	404	404
group_759		hypothetical protein	1	1	1	51	4	51	1		383	383	383
group_762		hypothetical protein	1	1	1	51	2	51	3		116	116	116
group_763		hypothetical protein	1	1	1	51	1	51	2		455	455	455
group_764		hypothetical protein	1	1	1	69	92	69	113		929	929	929
group_766		hypothetical protein	1	1	1	69	135	69	163		215	215	215
group_767		hypothetical protein	1	1	1	66	12	66	6		1358	1358	1358
group_773		HK97 gp10 family phage protein	1	1	1	69	183	69	208		413	413	413
group_8		MSCRAMM family adhesin	1	1	1	38	1	29	1	Investigate	2186	2186	2186																						SR2_H1.C1b_02201
group_80		hypothetical protein	1	1	1	65	6	65	3		650	650	650
group_808		hypothetical protein	1	1	1	12	1	37	1	Investigate	110	110	110
group_809		protein rep	1	1	1	47	3	50	2		887	887	887
group_810		hypothetical protein	1	1	1	47	4	50	3		1217	1217	1217
group_811		hypothetical protein	1	1	1	47	2	50	4		476	476	476
group_812		hypothetical protein	1	1	1	47	1	50	1		242	242	242
group_815		hypothetical protein	1	1	1	23	1	6	1	Investigate	569	569	569
group_82		FUSC family protein	1	1	1	65	11	65	6		986	986	986																		SR26_H2.C1_01770
group_843		hypothetical protein	1	1	1	3	1	38	1	Investigate	230	230	230
group_844		hypothetical protein	1	1	1	13	1	12	1	Investigate	128	128	128
group_845		hypothetical protein	1	1	1	35	1	9	1	Investigate	185	185	185
group_846		hypothetical protein	1	1	1	28	1	40	1	Investigate	188	188	188
group_847		hypothetical protein	1	1	1	27	1	34	1	Investigate	125	125	125
group_848		hypothetical protein	1	1	1	1	1	19	1	Investigate	137	137	137
group_849		hypothetical protein	1	1	1	20	1	35	1	Investigate	170	170	170
group_850		hypothetical protein	1	1	1	6	1	25	1	Investigate	212	212	212
group_851		2-dehydropantoate 2-reductase	1	1	1	69	249	69	33		518	518	518
group_855		hypothetical protein	1	1	1	68	14	68	15		1196	1196	1196
group_858		hypothetical protein	1	1	1	16	1	27	1	Investigate	161	161	161
group_860		hypothetical protein	1	1	1	8	1	17	1	Investigate	89	89	89
group_864		hypothetical protein	1	1	1	53	3	53	1		158	158	158
group_865		hypothetical protein	1	1	1	50	3	45	3		476	476	476
group_867		hypothetical protein	1	1	1	42	2	41	1	Investigate	1004	1004	1004
group_872		hypothetical protein	1	1	1	69	111	69	82		287	287	287
group_873		hypothetical protein	1	1	1	53	2	53	3		1109	1109	1109
group_875		hypothetical protein	1	1	1	69	29	69	266		206	206	206
group_877		hypothetical protein	1	1	1	68	3	68	22		1028	1028	1028
group_878		hypothetical protein	1	1	1	66	8	66	4		1370	1370	1370
group_88		BglG family transcription antiterminator	1	1	1	59	5	59	1		539	539	539							SR16_H1.C9a_01946
group_880		hypothetical protein	1	1	1	69	95	69	100		209	209	209
group_881		hypothetical protein	1	1	1	69	94	69	99		173	173	173
group_882		hypothetical protein	1	1	1	69	93	69	98		275	275	275
group_883		hypothetical protein	1	1	1	69	33	69	97		278	278	278
group_884		hypothetical protein	1	1	1	69	34	69	96		1949	1949	1949
group_885		hypothetical protein	1	1	1	69	35	69	77		206	206	206
group_886		hypothetical protein	1	1	1	69	36	69	78		743	743	743
group_887		hypothetical protein	1	1	1	69	37	69	79		590	590	590
group_888	ssb_2	single-stranded DNA-binding protein	1	1	1	69	38	69	80		485	485	485
group_889		ATP-binding protein	1	1	1	69	214	69	237		788	788	788
group_890		hypothetical protein	1	1	1	14	1	5	1	Investigate	179	179	179
group_891		hypothetical protein	1	1	1	69	28	69	72		1946	1946	1946
group_892		hypothetical protein	1	1	1	69	27	69	71		284	284	284
group_893		hypothetical protein	1	1	1	69	26	69	70		272	272	272
group_894		hypothetical protein	1	1	1	69	25	69	69		179	179	179
group_895		hypothetical protein	1	1	1	69	24	69	68		209	209	209
group_896		hypothetical protein	1	1	1	69	23	69	67		92	92	92
group_897		hypothetical protein	1	1	1	69	21	69	65		221	221	221
group_898		hypothetical protein	1	1	1	69	20	69	64		191	191	191
group_899		phage regulatory protein/antirepressor Ant	1	1	1	69	19	69	63		773	773	773
group_900		hypothetical protein	1	1	1	69	18	69	62		209	209	209
group_901		hypothetical protein	1	1	1	69	17	69	61		329	329	329
group_902		hypothetical protein	1	1	1	69	16	69	60		473	473	473
group_903		hypothetical protein	1	1	1	69	15	69	59		791	791	791
group_904		site-specific integrase	1	1	1	69	14	69	58		1049	1049	1049
group_905		hypothetical protein	1	1	1	69	51	69	252		332	332	332
group_906		hypothetical protein	1	1	1	69	49	69	250		173	173	173
group_907		hypothetical protein	1	1	1	69	48	69	249		179	179	179
group_908		hypothetical protein	1	1	1	69	47	69	248		401	401	401
group_909		terminase small subunit	1	1	1	69	46	69	247		494	494	494
group_912		phage head morphogenesis protein	1	1	1	69	44	69	245		944	944	944
group_913		phage scaffolding protein	1	1	1	69	43	69	244		599	599	599
group_918		hypothetical protein	1	1	1	69	42	69	243		494	494	494
group_919		phage tail family protein	1	1	1	69	39	69	240		917	917	917
group_920		phage tail protein	1	1	1	69	138	69	168		566	566	566
group_921		phage head-tail adapter protein	1	1	1	69	139	69	211		335	335	335
group_922		hypothetical protein	1	1	1	46	4	47	1		818	818	818
group_923		hypothetical protein	1	1	1	46	3	47	2		281	281	281
group_924		hypothetical protein	1	1	1	46	2	47	4		482	482	482
group_925		hypothetical protein	1	1	1	46	1	47	3		551	551	551
abc-f_3		ABC-F type ribosomal protection protein	1	1	1						317	317	317
nifS		Cysteine desulfurase NifS	1	1	1	39	1	20	1	Investigate	236	236	236																													SR36_H3.C4_02309
pepP		Xaa-Pro aminopeptidase	1	1	1	21	1	26	1	Investigate	191	191	191												SR20_H1.C12_02226
repD		Replication initiation protein	1	1	1	53	1	53	2		944	944	944
repN		Replication initiation protein	1	1	1	51	3	51	4		944	944	944
rpoB_2		DNA-directed RNA polymerase subunit beta	1	1	1	29	1	11	1	Investigate	206	206	206									SR18_H1.C10_02225
[truncated: 46 more columns]

## Sheet: Table S3b
Table S3b: Genes unique for S. rostri CM isolate (n=1). The isolate is marked in color:
Gene	Non-unique Gene name	Annotation	No. isolates	No. sequences	Avg sequences per isolate	Genome Fragment	Order within Fragment	Accessory Fragment	Accessory Order with Fragment	QC	Min group size nuc	Max group size nuc	Avg group size nuc	SR10_H1.C6a	SR11_H1.C6b	SR12_H1.C7a	SR13_H1.C7b	SR14_H1.C7c	SR15_H1.C8	SR16_H1.C9a	SR17_H1.C9b	SR18_H1.C10	SR19_H1.C11	SR1_H1.C1a	SR20_H1.C12	SR21_H1.C13	SR22_H1.C14	SR23_H1.C15a	SR24_H1.C15b	SR25_H1.C16	SR26_H2.C1	SR27_H3.C1a	SR28_H3.C1b	SR29_H3.C1c	SR2_H1.C1b	SR30_H3.C1d	SR31_H3.C2a	SR32_H3.C2b	SR33_H3.C3a	SR34_H3.C3b	SR35_H3.C3c	SR36_H3.C4	SR37_H3.C5	SR38_H3.C6a	SR39_H3.C6b	SR3_H1.C2	SR40_H3.C7a	SR41_H3.C7b	SR42_H3.C8a
bcp_1		thioredoxin-dependent thiol peroxidase	1	1	1	4	2	1	2	Investigate	194	194	194
dut_1		Deoxyuridine 5'-triphosphate nucleotidohydrolase	1	1	1	10	2	10	19		515	515	515
group_118		hypothetical protein	1	1	1	9	15	9	7		749	749	749
group_120		hypothetical protein	1	1	1	10	9	10	15		302	302	302
group_121		hypothetical protein	1	1	1	10	7	10	17		986	986	986
group_123		hypothetical protein	1	1	1	10	22	10	4		275	275	275
group_124		hypothetical protein	1	1	1	10	21	10	3		344	344	344
group_125		terminase	1	1	1	10	20	10	2		3230	3230	3230
group_130		heavy metal translocating P-type ATPase	1	1	1	1	1	6	2	Investigate	809	809	809
group_224		lactose-specific PTS transporter subunit EIIC	1	1	1	4	1	1	1	Investigate	797	797	797
group_30		hypothetical protein	1	1	1	10	18	10	6		425	425	425
group_482		HK97 gp10 family phage protein	1	1	1	10	17	10	7		413	413	413
group_876		hypothetical protein	1	1	1	1	2	6	1	Investigate	101	101	101
group_877		hypothetical protein	1	1	1	2	1	2	1	Investigate	1028	1028	1028
group_878		hypothetical protein	1	1	1	5	1	5	1	Investigate	1370	1370	1370
group_880		hypothetical protein	1	1	1	8	7	8	2		209	209	209
group_881		hypothetical protein	1	1	1	8	8	8	3		173	173	173
group_882		hypothetical protein	1	1	1	8	9	8	4		275	275	275
group_883		hypothetical protein	1	1	1	8	10	8	5		278	278	278
group_884		hypothetical protein	1	1	1	8	6	8	6		1949	1949	1949
group_885		hypothetical protein	1	1	1	8	5	8	7		206	206	206
group_886		hypothetical protein	1	1	1	8	4	8	8		743	743	743
group_887		hypothetical protein	1	1	1	8	3	8	9		590	590	590
ssb_2		single-stranded DNA-binding protein	1	1	1						485	485	485
group_889		ATP-binding protein	1	1	1	8	1	8	1		788	788	788
group_890		hypothetical protein	1	1	1	3	1	4	1	Investigate	179	179	179
group_891		hypothetical protein	1	1	1	9	1	9	1		1946	1946	1946
group_892		hypothetical protein	1	1	1	9	2	9	2		284	284	284
group_893		hypothetical protein	1	1	1	9	3	9	3		272	272	272
group_894		hypothetical protein	1	1	1	9	4	9	4		179	179	179
group_895		hypothetical protein	1	1	1	9	5	9	5		209	209	209
group_896		hypothetical protein	1	1	1	9	6	9	6		92	92	92
group_897		hypothetical protein	1	1	1	9	14	9	8		221	221	221
group_898		hypothetical protein	1	1	1	9	13	9	9		191	191	191
group_899		phage regulatory protein/antirepressor Ant	1	1	1	9	12	9	10		773	773	773
group_900		hypothetical protein	1	1	1	9	11	9	11		209	209	209
group_901		hypothetical protein	1	1	1	9	10	9	15		329	329	329
group_902		hypothetical protein	1	1	1	9	9	9	14		473	473	473
group_903		hypothetical protein	1	1	1	9	8	9	13		791	791	791
group_904		site-specific integrase	1	1	1	9	7	9	12		1049	1049	1049
group_905		hypothetical protein	1	1	1	10	1	10	18		332	332	332
group_906		hypothetical protein	1	1	1	10	3	10	20		173	173	173
group_907		hypothetical protein	1	1	1	10	4	10	21		179	179	179
group_908		hypothetical protein	1	1	1	10	5	10	22		401	401	401
group_909		terminase small subunit	1	1	1	10	6	10	23		494	494	494
group_910		HNH endonuclease	1	1	1	10	8	10	16		587	587	587
group_911		phage portal protein	1	1	1	10	10	10	14		1418	1418	1418
group_912		phage head morphogenesis protein	1	1	1	10	11	10	13		944	944	944
group_913		phage scaffolding protein	1	1	1	10	12	10	12		599	599	599
group_914		N4-gp56 family major capsid protein	1	1	1	10	13	10	11		815	815	815
group_915		hypothetical protein	1	1	1	10	14	10	10		281	281	281
group_916		phage head-tail connector protein	1	1	1	10	15	10	9		296	296	296
group_917		phage head-tail adapter protein	1	1	1	10	16	10	8		335	335	335
group_918		hypothetical protein	1	1	1	10	23	10	5		494	494	494
group_919		phage tail family protein	1	1	1	10	19	10	1		917	917	917
group_920		phage tail protein	1	1	1	6	1	3	1	Investigate	566	566	566
group_921		phage head-tail adapter protein	1	1	1	6	2	3	2	Investigate	335	335	335
group_922		hypothetical protein	1	1	1	7	3	7	2		818	818	818
group_923		hypothetical protein	1	1	1	7	4	7	3		281	281	281
group_924		hypothetical protein	1	1	1	7	2	7	4		482	482	482
group_925		hypothetical protein	1	1	1	7	1	7	1		551	551	551
[truncated: 45 more columns]

## Sheet: Table S3c
Table S3c: Genes unique for S. rostri SCM isolates (n=80). The isolates are marked in color:
Gene	Non-unique Gene name	Annotation	No. isolates	No. sequences	Avg sequences per isolate	Genome Fragment	Order within Fragment	Accessory Fragment	Accessory Order with Fragment	QC	Min group size nuc	Max group size nuc	Avg group size nuc	SR10_H1.C6a	SR11_H1.C6b	SR12_H1.C7a	SR13_H1.C7b	SR14_H1.C7c	SR15_H1.C8	SR16_H1.C9a	SR17_H1.C9b	SR18_H1.C10	SR19_H1.C11	SR1_H1.C1a	SR20_H1.C12	SR21_H1.C13	SR22_H1.C14	SR23_H1.C15a	SR24_H1.C15b	SR25_H1.C16	SR26_H2.C1	SR27_H3.C1a	SR28_H3.C1b	SR29_H3.C1c	SR2_H1.C1b	SR30_H3.C1d	SR31_H3.C2a	SR32_H3.C2b	SR33_H3.C3a	SR34_H3.C3b	SR35_H3.C3c	SR36_H3.C4	SR37_H3.C5	SR38_H3.C6a	SR39_H3.C6b	SR3_H1.C2	SR40_H3.C7a	SR41_H3.C7b	SR42_H3.C8a
group_399		hypothetical protein	79	79	1	103	16	103	24		1364	1424	1366	SR10_H1.C6a_01860	SR11_H1.C6b_01859	SR12_H1.C7a_01862	SR13_H1.C7b_01932	SR14_H1.C7c_01863	SR15_H1.C8_01930	SR16_H1.C9a_01194	SR17_H1.C9b_01929	SR18_H1.C10_01931	SR19_H1.C11_01928	SR1_H1.C1a_01866	SR20_H1.C12_01863	SR21_H1.C13_01932	SR22_H1.C14_01931	SR23_H1.C15a_00816	SR24_H1.C15b_01930	SR25_H1.C16_01930	SR26_H2.C1_01962	SR27_H3.C1a_01988	SR28_H3.C1b_01988	SR29_H3.C1c_00720	SR2_H1.C1b_01933	SR30_H3.C1d_01987	SR31_H3.C2a_01993	SR32_H3.C2b_00898	SR33_H3.C3a_01941	SR34_H3.C3b_01986	SR35_H3.C3c_01988	SR36_H3.C4_00901	SR37_H3.C5_01990	SR38_H3.C6a_01985	SR39_H3.C6b_01985	SR3_H1.C2_01930	SR40_H3.C7a_01980	SR41_H3.C7b_00900	SR42_H3.C8a_01982
group_570		hypothetical protein	77	77	1	104	135	104	75		236	236	236	SR10_H1.C6a_01921		SR12_H1.C7a_01912	SR13_H1.C7b_00942	SR14_H1.C7c_01924	SR15_H1.C8_00940	SR16_H1.C9a_01057	SR17_H1.C9b_01022	SR18_H1.C10_01055	SR19_H1.C11_01054		SR20_H1.C12_01923	SR21_H1.C13_01023	SR22_H1.C14_00941	SR23_H1.C15a_01923	SR24_H1.C15b_00942	SR25_H1.C16_01055	SR26_H2.C1_00693	SR27_H3.C1a_02299	SR28_H3.C1b_02302	SR29_H3.C1c_02296	SR2_H1.C1b_01054	SR30_H3.C1d_02296	SR31_H3.C2a_02300	SR32_H3.C2b_02217	SR33_H3.C3a_02219	SR34_H3.C3b_02297	SR35_H3.C3c_02285	SR36_H3.C4_02054	SR37_H3.C5_02300	SR38_H3.C6a_02297	SR39_H3.C6b_02297	SR3_H1.C2_00942	SR40_H3.C7a_02281	SR41_H3.C7b_02302	SR42_H3.C8a_02337
group_90		hypothetical protein	77	77	1	104	133	104	72		458	689	669	SR10_H1.C6a_01923		SR12_H1.C7a_01910	SR13_H1.C7b_00944	SR14_H1.C7c_01926	SR15_H1.C8_00942	SR16_H1.C9a_01059	SR17_H1.C9b_01020	SR18_H1.C10_01057	SR19_H1.C11_01056		SR20_H1.C12_01925	SR21_H1.C13_01021	SR22_H1.C14_00943	SR23_H1.C15a_01925	SR24_H1.C15b_00944	SR25_H1.C16_01057	SR26_H2.C1_00695	SR27_H3.C1a_02301	SR28_H3.C1b_02304	SR29_H3.C1c_02298	SR2_H1.C1b_01056	SR30_H3.C1d_02298	SR31_H3.C2a_02302	SR32_H3.C2b_02219	SR33_H3.C3a_02221	SR34_H3.C3b_02299	SR35_H3.C3c_02287	SR36_H3.C4_02056	SR37_H3.C5_02302	SR38_H3.C6a_02299	SR39_H3.C6b_02299	SR3_H1.C2_00944	SR40_H3.C7a_02279	SR41_H3.C7b_02304	SR42_H3.C8a_02335
group_409		hypothetical protein	76	76	1	104	134	104	73		263	398	396	SR10_H1.C6a_01922		SR12_H1.C7a_01911	SR13_H1.C7b_00943	SR14_H1.C7c_01925	SR15_H1.C8_00941	SR16_H1.C9a_01058	SR17_H1.C9b_01021	SR18_H1.C10_01056	SR19_H1.C11_01055		SR20_H1.C12_01924	SR21_H1.C13_01022	SR22_H1.C14_00942	SR23_H1.C15a_01924	SR24_H1.C15b_00943	SR25_H1.C16_01056	SR26_H2.C1_00694	SR27_H3.C1a_02300	SR28_H3.C1b_02303	SR29_H3.C1c_02297	SR2_H1.C1b_01055	SR30_H3.C1d_02297	SR31_H3.C2a_02301	SR32_H3.C2b_02218	SR33_H3.C3a_02220	SR34_H3.C3b_02298	SR35_H3.C3c_02286	SR36_H3.C4_02055	SR37_H3.C5_02301	SR38_H3.C6a_02298	SR39_H3.C6b_02298	SR3_H1.C2_00943	SR40_H3.C7a_02280	SR41_H3.C7b_02303	SR42_H3.C8a_02336
group_5		hypothetical protein	73	73	1	103	23	103	27		434	2978	1108	SR10_H1.C6a_01840	SR11_H1.C6b_01879	SR12_H1.C7a_01882	SR13_H1.C7b_01912	SR14_H1.C7c_01843	SR15_H1.C8_01950		SR17_H1.C9b_01909	SR18_H1.C10_01951	SR19_H1.C11_01909	SR1_H1.C1a_01886	SR20_H1.C12_01883	SR21_H1.C13_01952	SR22_H1.C14_01951		SR24_H1.C15b_01910	SR25_H1.C16_01950	SR26_H2.C1_01942	SR27_H3.C1a_02008	SR28_H3.C1b_01968	SR29_H3.C1c_00740	SR2_H1.C1b_01913	SR30_H3.C1d_02007	SR31_H3.C2a_02013	SR32_H3.C2b_00878	SR33_H3.C3a_01961	SR34_H3.C3b_02006	SR35_H3.C3c_02008	SR36_H3.C4_00881	SR37_H3.C5_02010	SR38_H3.C6a_02005	SR39_H3.C6b_02005	SR3_H1.C2_01950	SR40_H3.C7a_01998	SR41_H3.C7b_00880	SR42_H3.C8a_02002
group_77		UvrD-helicase domain-containing protein	68	68	1	103	29	103	29		1277	2051	2024	SR10_H1.C6a_01181	SR11_H1.C6b_01262	SR12_H1.C7a_01184	SR13_H1.C7b_01334	SR14_H1.C7c_01069	SR15_H1.C8_01330	SR16_H1.C9a_01296	SR17_H1.C9b_01445	SR18_H1.C10_01446	SR19_H1.C11_01446	SR1_H1.C1a_01264	SR20_H1.C12_01070	SR21_H1.C13_01447	SR22_H1.C14_01331	SR23_H1.C15a_00918	SR24_H1.C15b_01332	SR25_H1.C16_01444	SR26_H2.C1_01471	SR27_H3.C1a_01171	SR28_H3.C1b_01171		SR2_H1.C1b_01445	SR30_H3.C1d_01147		SR32_H3.C2b_00798			SR35_H3.C3c_01148	SR36_H3.C4_00801		SR38_H3.C6a_01170	SR39_H3.C6b_01168	SR3_H1.C2_01332	SR40_H3.C7a_01029	SR41_H3.C7b_00800	SR42_H3.C8a_01029
group_569		hypothetical protein	63	63	1	104	221	104	139		383	383	383	SR10_H1.C6a_01919		SR12_H1.C7a_01914	SR13_H1.C7b_00940	SR14_H1.C7c_01922	SR15_H1.C8_00938	SR16_H1.C9a_01055	SR17_H1.C9b_01024	SR18_H1.C10_01053	SR19_H1.C11_01052		SR20_H1.C12_01921	SR21_H1.C13_01025	SR22_H1.C14_00939	SR23_H1.C15a_01921	SR24_H1.C15b_00940	SR25_H1.C16_01053	SR26_H2.C1_00691	SR27_H3.C1a_02304	SR28_H3.C1b_02305	SR29_H3.C1c_02301	SR2_H1.C1b_01052	SR30_H3.C1d_02302	SR31_H3.C2a_02303	SR32_H3.C2b_02215	SR33_H3.C3a_02217	SR34_H3.C3b_02304	SR35_H3.C3c_02297	SR36_H3.C4_02052	SR37_H3.C5_02305	SR38_H3.C6a_02302	SR39_H3.C6b_02303	SR3_H1.C2_00940	SR40_H3.C7a_02283	SR41_H3.C7b_02307	SR42_H3.C8a_02339
group_407		dUTPase	59	59	1	104	224	104	134		368	524	521	SR10_H1.C6a_01915		SR12_H1.C7a_01918	SR13_H1.C7b_00936	SR14_H1.C7c_01918	SR15_H1.C8_00934	SR16_H1.C9a_01051	SR17_H1.C9b_01028	SR18_H1.C10_01049	SR19_H1.C11_01048		SR20_H1.C12_01917	SR21_H1.C13_01029	SR22_H1.C14_00935	SR23_H1.C15a_01917	SR24_H1.C15b_00936	SR25_H1.C16_01049	SR26_H2.C1_00687	SR27_H3.C1a_01526	SR28_H3.C1b_01527	SR29_H3.C1c_01571	SR2_H1.C1b_01048	SR30_H3.C1d_01525	SR31_H3.C2a_01529			SR34_H3.C3b_01525	SR35_H3.C3c_01526		SR37_H3.C5_01528	SR38_H3.C6a_01524	SR39_H3.C6b_01385	SR3_H1.C2_00936	SR40_H3.C7a_01268	SR41_H3.C7b_01569	SR42_H3.C8a_01268
group_565		hypothetical protein	59	59	1	104	57	104	130		302	302	302	SR10_H1.C6a_01912		SR12_H1.C7a_01921	SR13_H1.C7b_00933	SR14_H1.C7c_01915	SR15_H1.C8_00931	SR16_H1.C9a_01048	SR17_H1.C9b_01031	SR18_H1.C10_01046	SR19_H1.C11_01045		SR20_H1.C12_01914	SR21_H1.C13_01032	SR22_H1.C14_00932	SR23_H1.C15a_01914	SR24_H1.C15b_00933	SR25_H1.C16_01046	SR26_H2.C1_00684	SR27_H3.C1a_01523	SR28_H3.C1b_01524	SR29_H3.C1c_01568	SR2_H1.C1b_01045	SR30_H3.C1d_01522	SR31_H3.C2a_01526			SR34_H3.C3b_01522	SR35_H3.C3c_01523		SR37_H3.C5_01525	SR38_H3.C6a_01521	SR39_H3.C6b_01388	SR3_H1.C2_00933	SR40_H3.C7a_01271	SR41_H3.C7b_01566	SR42_H3.C8a_01271
group_566		hypothetical protein	59	59	1	104	58	104	131		146	146	146	SR10_H1.C6a_01913		SR12_H1.C7a_01920	SR13_H1.C7b_00934	SR14_H1.C7c_01916	SR15_H1.C8_00932	SR16_H1.C9a_01049	SR17_H1.C9b_01030	SR18_H1.C10_01047	SR19_H1.C11_01046		SR20_H1.C12_01915	SR21_H1.C13_01031	SR22_H1.C14_00933	SR23_H1.C15a_01915	SR24_H1.C15b_00934	SR25_H1.C16_01047	SR26_H2.C1_00685	SR27_H3.C1a_01524	SR28_H3.C1b_01525	SR29_H3.C1c_01569	SR2_H1.C1b_01046	SR30_H3.C1d_01523	SR31_H3.C2a_01527			SR34_H3.C3b_01523	SR35_H3.C3c_01524		SR37_H3.C5_01526	SR38_H3.C6a_01522	SR39_H3.C6b_01387	SR3_H1.C2_00934	SR40_H3.C7a_01270	SR41_H3.C7b_01567	SR42_H3.C8a_01270
group_567		hypothetical protein	59	59	1	104	59	104	132		92	92	92	SR10_H1.C6a_01914		SR12_H1.C7a_01919	SR13_H1.C7b_00935	SR14_H1.C7c_01917	SR15_H1.C8_00933	SR16_H1.C9a_01050	SR17_H1.C9b_01029	SR18_H1.C10_01048	SR19_H1.C11_01047		SR20_H1.C12_01916	SR21_H1.C13_01030	SR22_H1.C14_00934	SR23_H1.C15a_01916	SR24_H1.C15b_00935	SR25_H1.C16_01048	SR26_H2.C1_00686	SR27_H3.C1a_01525	SR28_H3.C1b_01526	SR29_H3.C1c_01570	SR2_H1.C1b_01047	SR30_H3.C1d_01524	SR31_H3.C2a_01528			SR34_H3.C3b_01524	SR35_H3.C3c_01525		SR37_H3.C5_01527	SR38_H3.C6a_01523	SR39_H3.C6b_01386	SR3_H1.C2_00935	SR40_H3.C7a_01269	SR41_H3.C7b_01568	SR42_H3.C8a_01269
group_550		hypothetical protein	57	57	1	104	31	104	89		161	161	161	SR10_H1.C6a_01890		SR12_H1.C7a_01943	SR13_H1.C7b_00911	SR14_H1.C7c_01893	SR15_H1.C8_00910	SR16_H1.C9a_01026	SR17_H1.C9b_01053	SR18_H1.C10_01024	SR19_H1.C11_01023		SR20_H1.C12_01892	SR21_H1.C13_01054	SR22_H1.C14_00911	SR23_H1.C15a_01893	SR24_H1.C15b_00911	SR25_H1.C16_01024	SR26_H2.C1_00662	SR27_H3.C1a_01501	SR28_H3.C1b_01502	SR29_H3.C1c_01546	SR2_H1.C1b_01022	SR30_H3.C1d_01500	SR31_H3.C2a_01504			SR34_H3.C3b_01500	SR35_H3.C3c_01501		SR37_H3.C5_01503	SR38_H3.C6a_01499	SR39_H3.C6b_01410	SR3_H1.C2_00911	SR40_H3.C7a_01293	SR41_H3.C7b_01544	SR42_H3.C8a_01293
ydhF		Oxidoreductase YdhF	57	57	1	104	92	104	5		635	908	788	SR10_H1.C6a_01757	SR11_H1.C6b_00989	SR12_H1.C7a_01758	SR13_H1.C7b_01054	SR14_H1.C7c_01760	SR15_H1.C8_01051	SR16_H1.C9a_01169	SR17_H1.C9b_00911	SR18_H1.C10_01166	SR19_H1.C11_01166	SR1_H1.C1a_01177	SR20_H1.C12_01758	SR21_H1.C13_00911	SR22_H1.C14_01052	SR23_H1.C15a_01801	SR24_H1.C15b_01053	SR25_H1.C16_01166		SR27_H3.C1a_01533	SR28_H3.C1b_01534	SR29_H3.C1c_01668	SR2_H1.C1b_01165	SR30_H3.C1d_01532	SR31_H3.C2a_01536	SR32_H3.C2b_01110	SR33_H3.C3a_00701	SR34_H3.C3b_01622	SR35_H3.C3c_01533	SR36_H3.C4_01114	SR37_H3.C5_01626	SR38_H3.C6a_01531	SR39_H3.C6b_01530	SR3_H1.C2_01054	SR40_H3.C7a_01616	SR41_H3.C7b_01666	SR42_H3.C8a_01617
group_250		phage major capsid protein	56	56	1	104	44	104	103		116	1220	1200	SR10_H1.C6a_01901		SR12_H1.C7a_01932	SR13_H1.C7b_00922	SR14_H1.C7c_01904	SR15_H1.C8_00921	SR16_H1.C9a_01037	SR17_H1.C9b_01042	SR18_H1.C10_01035	SR19_H1.C11_01034		SR20_H1.C12_01903	SR21_H1.C13_01043	SR22_H1.C14_00922	SR23_H1.C15a_01904	SR24_H1.C15b_00922	SR25_H1.C16_01035	SR26_H2.C1_00673	SR27_H3.C1a_01512	SR28_H3.C1b_01513	SR29_H3.C1c_01557	SR2_H1.C1b_01033	SR30_H3.C1d_01511	SR31_H3.C2a_01515			SR34_H3.C3b_01511	SR35_H3.C3c_01512		SR37_H3.C5_01514	SR38_H3.C6a_01510	SR39_H3.C6b_01399	SR3_H1.C2_00922	SR40_H3.C7a_01282	SR41_H3.C7b_01555	SR42_H3.C8a_01282
group_251		phage portal protein	56	56	1	104	46	104	105		1265	1274	1268	SR10_H1.C6a_01903		SR12_H1.C7a_01930	SR13_H1.C7b_00924	SR14_H1.C7c_01906	SR15_H1.C8_00923	SR16_H1.C9a_01039	SR17_H1.C9b_01040	SR18_H1.C10_01037	SR19_H1.C11_01036		SR20_H1.C12_01905	SR21_H1.C13_01041	SR22_H1.C14_00924	SR23_H1.C15a_01906	SR24_H1.C15b_00924	SR25_H1.C16_01037	SR26_H2.C1_00675	SR27_H3.C1a_01514	SR28_H3.C1b_01515	SR29_H3.C1c_01559	SR2_H1.C1b_01035	SR30_H3.C1d_01513	SR31_H3.C2a_01517			SR34_H3.C3b_01513	SR35_H3.C3c_01514		SR37_H3.C5_01516	SR38_H3.C6a_01512	SR39_H3.C6b_01397	SR3_H1.C2_00924	SR40_H3.C7a_01280	SR41_H3.C7b_01557	SR42_H3.C8a_01280
group_403		hypothetical protein	56	56	1	104	32	104	90		1076	4163	4107	SR10_H1.C6a_01891		SR12_H1.C7a_01942	SR13_H1.C7b_00912	SR14_H1.C7c_01894	SR15_H1.C8_00911	SR16_H1.C9a_01027	SR17_H1.C9b_01052	SR18_H1.C10_01025	SR19_H1.C11_01024		SR20_H1.C12_01893	SR21_H1.C13_01053	SR22_H1.C14_00912	SR23_H1.C15a_01894	SR24_H1.C15b_00912	SR25_H1.C16_01025	SR26_H2.C1_00663	SR27_H3.C1a_01502	SR28_H3.C1b_01503	SR29_H3.C1c_01547	SR2_H1.C1b_01023	SR30_H3.C1d_01501	SR31_H3.C2a_01505			SR34_H3.C3b_01501	SR35_H3.C3c_01502		SR37_H3.C5_01504	SR38_H3.C6a_01500	SR39_H3.C6b_01409	SR3_H1.C2_00912	SR40_H3.C7a_01292	SR41_H3.C7b_01545	SR42_H3.C8a_01292
group_404		head-tail connector protein	56	56	1	104	42	104	100		299	299	299	SR10_H1.C6a_01899		SR12_H1.C7a_01934	SR13_H1.C7b_00920	SR14_H1.C7c_01902	SR15_H1.C8_00919	SR16_H1.C9a_01035	SR17_H1.C9b_01044	SR18_H1.C10_01033	SR19_H1.C11_01032		SR20_H1.C12_01901	SR21_H1.C13_01045	SR22_H1.C14_00920	SR23_H1.C15a_01902	SR24_H1.C15b_00920	SR25_H1.C16_01033	SR26_H2.C1_00671	SR27_H3.C1a_01510	SR28_H3.C1b_01511	SR29_H3.C1c_01555	SR2_H1.C1b_01031	SR30_H3.C1d_01509	SR31_H3.C2a_01513			SR34_H3.C3b_01509	SR35_H3.C3c_01510		SR37_H3.C5_01512	SR38_H3.C6a_01508	SR39_H3.C6b_01401	SR3_H1.C2_00920	SR40_H3.C7a_01284	SR41_H3.C7b_01553	SR42_H3.C8a_01284
group_406		HK97 family phage prohead protease	56	56	1	104	45	104	104		584	584	584	SR10_H1.C6a_01902		SR12_H1.C7a_01931	SR13_H1.C7b_00923	SR14_H1.C7c_01905	SR15_H1.C8_00922	SR16_H1.C9a_01038	SR17_H1.C9b_01041	SR18_H1.C10_01036	SR19_H1.C11_01035		SR20_H1.C12_01904	SR21_H1.C13_01042	SR22_H1.C14_00923	SR23_H1.C15a_01905	SR24_H1.C15b_00923	SR25_H1.C16_01036	SR26_H2.C1_00674	SR27_H3.C1a_01513	SR28_H3.C1b_01514	SR29_H3.C1c_01558	SR2_H1.C1b_01034	SR30_H3.C1d_01512	SR31_H3.C2a_01516			SR34_H3.C3b_01512	SR35_H3.C3c_01513		SR37_H3.C5_01515	SR38_H3.C6a_01511	SR39_H3.C6b_01398	SR3_H1.C2_00923	SR40_H3.C7a_01281	SR41_H3.C7b_01556	SR42_H3.C8a_01281
group_419		hypothetical protein	56	56	1	104	101	104	13		191	191	191	SR10_H1.C6a_01948		SR12_H1.C7a_01885	SR13_H1.C7b_00969	SR14_H1.C7c_01951	SR15_H1.C8_00967	SR16_H1.C9a_01084	SR17_H1.C9b_00995	SR18_H1.C10_01081	SR19_H1.C11_01081		SR20_H1.C12_01950	SR21_H1.C13_00996	SR22_H1.C14_00968	SR23_H1.C15a_01950	SR24_H1.C15b_00969	SR25_H1.C16_01082	SR26_H2.C1_00716	SR27_H3.C1a_01615	SR28_H3.C1b_01616	SR29_H3.C1c_01586	SR2_H1.C1b_01080	SR30_H3.C1d_01614	SR31_H3.C2a_01619			SR34_H3.C3b_01540	SR35_H3.C3c_01615		SR37_H3.C5_01543	SR38_H3.C6a_01613	SR39_H3.C6b_01612	SR3_H1.C2_00969	SR40_H3.C7a_01534	SR41_H3.C7b_01584	SR42_H3.C8a_01534
group_548		phage holin family protein	56	56	1	104	29	104	87		491	491	491	SR10_H1.C6a_01888		SR12_H1.C7a_01945	SR13_H1.C7b_00909	SR14_H1.C7c_01891	SR15_H1.C8_00908	SR16_H1.C9a_01024	SR17_H1.C9b_01055	SR18_H1.C10_01022	SR19_H1.C11_01021		SR20_H1.C12_01890	SR21_H1.C13_01056	SR22_H1.C14_00909	SR23_H1.C15a_01891	SR24_H1.C15b_00909	SR25_H1.C16_01022	SR26_H2.C1_00660	SR27_H3.C1a_01499	SR28_H3.C1b_01500	SR29_H3.C1c_01544	SR2_H1.C1b_01020	SR30_H3.C1d_01498	SR31_H3.C2a_01502			SR34_H3.C3b_01498	SR35_H3.C3c_01499		SR37_H3.C5_01501	SR38_H3.C6a_01497	SR39_H3.C6b_01412	SR3_H1.C2_00909	SR40_H3.C7a_01295	SR41_H3.C7b_01542	SR42_H3.C8a_01295
group_549		hypothetical protein	56	56	1	104	30	104	88		290	290	290	SR10_H1.C6a_01889		SR12_H1.C7a_01944	SR13_H1.C7b_00910	SR14_H1.C7c_01892	SR15_H1.C8_00909	SR16_H1.C9a_01025	SR17_H1.C9b_01054	SR18_H1.C10_01023	SR19_H1.C11_01022		SR20_H1.C12_01891	SR21_H1.C13_01055	SR22_H1.C14_00910	SR23_H1.C15a_01892	SR24_H1.C15b_00910	SR25_H1.C16_01023	SR26_H2.C1_00661	SR27_H3.C1a_01500	SR28_H3.C1b_01501	SR29_H3.C1c_01545	SR2_H1.C1b_01021	SR30_H3.C1d_01499	SR31_H3.C2a_01503			SR34_H3.C3b_01499	SR35_H3.C3c_01500		SR37_H3.C5_01502	SR38_H3.C6a_01498	SR39_H3.C6b_01411	SR3_H1.C2_00910	SR40_H3.C7a_01294	SR41_H3.C7b_01543	SR42_H3.C8a_01294
group_552		hypothetical protein	56	56	1	104	37	104	95		446	446	446	SR10_H1.C6a_01894		SR12_H1.C7a_01939	SR13_H1.C7b_00915	SR14_H1.C7c_01897	SR15_H1.C8_00914	SR16_H1.C9a_01030	SR17_H1.C9b_01049	SR18_H1.C10_01028	SR19_H1.C11_01027		SR20_H1.C12_01896	SR21_H1.C13_01050	SR22_H1.C14_00915	SR23_H1.C15a_01897	SR24_H1.C15b_00915	SR25_H1.C16_01028	SR26_H2.C1_00666	SR27_H3.C1a_01505	SR28_H3.C1b_01506	SR29_H3.C1c_01550	SR2_H1.C1b_01026	SR30_H3.C1d_01504	SR31_H3.C2a_01508			SR34_H3.C3b_01504	SR35_H3.C3c_01505		SR37_H3.C5_01507	SR38_H3.C6a_01503	SR39_H3.C6b_01406	SR3_H1.C2_00915	SR40_H3.C7a_01289	SR41_H3.C7b_01548	SR42_H3.C8a_01289
group_553		hypothetical protein	56	56	1	104	38	104	96		740	740	740	SR10_H1.C6a_01895		SR12_H1.C7a_01938	SR13_H1.C7b_00916	SR14_H1.C7c_01898	SR15_H1.C8_00915	SR16_H1.C9a_01031	SR17_H1.C9b_01048	SR18_H1.C10_01029	SR19_H1.C11_01028		SR20_H1.C12_01897	SR21_H1.C13_01049	SR22_H1.C14_00916	SR23_H1.C15a_01898	SR24_H1.C15b_00916	SR25_H1.C16_01029	SR26_H2.C1_00667	SR27_H3.C1a_01506	SR28_H3.C1b_01507	SR29_H3.C1c_01551	SR2_H1.C1b_01027	SR30_H3.C1d_01505	SR31_H3.C2a_01509			SR34_H3.C3b_01505	SR35_H3.C3c_01506		SR37_H3.C5_01508	SR38_H3.C6a_01504	SR39_H3.C6b_01405	SR3_H1.C2_00916	SR40_H3.C7a_01288	SR41_H3.C7b_01549	SR42_H3.C8a_01288
group_554		hypothetical protein	56	56	1	104	39	104	97		362	362	362	SR10_H1.C6a_01896		SR12_H1.C7a_01937	SR13_H1.C7b_00917	SR14_H1.C7c_01899	SR15_H1.C8_00916	SR16_H1.C9a_01032	SR17_H1.C9b_01047	SR18_H1.C10_01030	SR19_H1.C11_01029		SR20_H1.C12_01898	SR21_H1.C13_01048	SR22_H1.C14_00917	SR23_H1.C15a_01899	SR24_H1.C15b_00917	SR25_H1.C16_01030	SR26_H2.C1_00668	SR27_H3.C1a_01507	SR28_H3.C1b_01508	SR29_H3.C1c_01552	SR2_H1.C1b_01028	SR30_H3.C1d_01506	SR31_H3.C2a_01510			SR34_H3.C3b_01506	SR35_H3.C3c_01507		SR37_H3.C5_01509	SR38_H3.C6a_01505	SR39_H3.C6b_01404	SR3_H1.C2_00917	SR40_H3.C7a_01287	SR41_H3.C7b_01550	SR42_H3.C8a_01287
group_555		HK97 gp10 family phage protein	56	56	1	104	40	104	98		377	377	377	SR10_H1.C6a_01897		SR12_H1.C7a_01936	SR13_H1.C7b_00918	SR14_H1.C7c_01900	SR15_H1.C8_00917	SR16_H1.C9a_01033	SR17_H1.C9b_01046	SR18_H1.C10_01031	SR19_H1.C11_01030		SR20_H1.C12_01899	SR21_H1.C13_01047	SR22_H1.C14_00918	SR23_H1.C15a_01900	SR24_H1.C15b_00918	SR25_H1.C16_01031	SR26_H2.C1_00669	SR27_H3.C1a_01508	SR28_H3.C1b_01509	SR29_H3.C1c_01553	SR2_H1.C1b_01029	SR30_H3.C1d_01507	SR31_H3.C2a_01511			SR34_H3.C3b_01507	SR35_H3.C3c_01508		SR37_H3.C5_01510	SR38_H3.C6a_01506	SR39_H3.C6b_01403	SR3_H1.C2_00918	SR40_H3.C7a_01286	SR41_H3.C7b_01551	SR42_H3.C8a_01286
group_556		head-tail adaptor protein	56	56	1	104	41	104	99		332	332	332	SR10_H1.C6a_01898		SR12_H1.C7a_01935	SR13_H1.C7b_00919	SR14_H1.C7c_01901	SR15_H1.C8_00918	SR16_H1.C9a_01034	SR17_H1.C9b_01045	SR18_H1.C10_01032	SR19_H1.C11_01031		SR20_H1.C12_01900	SR21_H1.C13_01046	SR22_H1.C14_00919	SR23_H1.C15a_01901	SR24_H1.C15b_00919	SR25_H1.C16_01032	SR26_H2.C1_00670	SR27_H3.C1a_01509	SR28_H3.C1b_01510	SR29_H3.C1c_01554	SR2_H1.C1b_01030	SR30_H3.C1d_01508	SR31_H3.C2a_01512			SR34_H3.C3b_01508	SR35_H3.C3c_01509		SR37_H3.C5_01511	SR38_H3.C6a_01507	SR39_H3.C6b_01402	SR3_H1.C2_00919	SR40_H3.C7a_01285	SR41_H3.C7b_01552	SR42_H3.C8a_01285
group_558		hypothetical protein	56	56	1	104	48	104	107		197	197	197	SR10_H1.C6a_01904		SR12_H1.C7a_01929	SR13_H1.C7b_00925	SR14_H1.C7c_01907	SR15_H1.C8_00924	SR16_H1.C9a_01040	SR17_H1.C9b_01039	SR18_H1.C10_01038	SR19_H1.C11_01037		SR20_H1.C12_01906	SR21_H1.C13_01040	SR22_H1.C14_00925	SR23_H1.C15a_01907	SR24_H1.C15b_00925	SR25_H1.C16_01038	SR26_H2.C1_00676	SR27_H3.C1a_01515	SR28_H3.C1b_01516	SR29_H3.C1c_01560	SR2_H1.C1b_01036	SR30_H3.C1d_01514	SR31_H3.C2a_01518			SR34_H3.C3b_01514	SR35_H3.C3c_01515		SR37_H3.C5_01517	SR38_H3.C6a_01513	SR39_H3.C6b_01396	SR3_H1.C2_00925	SR40_H3.C7a_01279	SR41_H3.C7b_01558	SR42_H3.C8a_01279
group_559		phage terminase small subunit P27 family protein	56	56	1	104	51	104	109		473	473	473	SR10_H1.C6a_01906		SR12_H1.C7a_01927	SR13_H1.C7b_00927	SR14_H1.C7c_01909	SR15_H1.C8_00926	SR16_H1.C9a_01042	SR17_H1.C9b_01037	SR18_H1.C10_01040	SR19_H1.C11_01039		SR20_H1.C12_01908	SR21_H1.C13_01038	SR22_H1.C14_00927	SR23_H1.C15a_01909	SR24_H1.C15b_00927	SR25_H1.C16_01040	SR26_H2.C1_00678	SR27_H3.C1a_01517	SR28_H3.C1b_01518	SR29_H3.C1c_01562	SR2_H1.C1b_01039	SR30_H3.C1d_01516	SR31_H3.C2a_01520			SR34_H3.C3b_01516	SR35_H3.C3c_01517		SR37_H3.C5_01519	SR38_H3.C6a_01515	SR39_H3.C6b_01394	SR3_H1.C2_00927	SR40_H3.C7a_01277	SR41_H3.C7b_01560	SR42_H3.C8a_01277
group_561		hypothetical protein	56	56	1	104	53	104	111		377	377	377	SR10_H1.C6a_01908		SR12_H1.C7a_01925	SR13_H1.C7b_00929	SR14_H1.C7c_01911	SR15_H1.C8_00927	SR16_H1.C9a_01044	SR17_H1.C9b_01035	SR18_H1.C10_01042	SR19_H1.C11_01041		SR20_H1.C12_01910	SR21_H1.C13_01036	SR22_H1.C14_00928	SR23_H1.C15a_01910	SR24_H1.C15b_00929	SR25_H1.C16_01042	SR26_H2.C1_00680	SR27_H3.C1a_01519	SR28_H3.C1b_01520	SR29_H3.C1c_01564	SR2_H1.C1b_01041	SR30_H3.C1d_01518	SR31_H3.C2a_01522			SR34_H3.C3b_01518	SR35_H3.C3c_01519		SR37_H3.C5_01521	SR38_H3.C6a_01517	SR39_H3.C6b_01392	SR3_H1.C2_00929	SR40_H3.C7a_01275	SR41_H3.C7b_01562	SR42_H3.C8a_01275
group_562		transcriptional regulator	56	56	1	104	54	104	112		425	425	425	SR10_H1.C6a_01909		SR12_H1.C7a_01924	SR13_H1.C7b_00930	SR14_H1.C7c_01912	SR15_H1.C8_00928	SR16_H1.C9a_01045	SR17_H1.C9b_01034	SR18_H1.C10_01043	SR19_H1.C11_01042		SR20_H1.C12_01911	SR21_H1.C13_01035	SR22_H1.C14_00929	SR23_H1.C15a_01911	SR24_H1.C15b_00930	SR25_H1.C16_01043	SR26_H2.C1_00681	SR27_H3.C1a_01520	SR28_H3.C1b_01521	SR29_H3.C1c_01565	SR2_H1.C1b_01042	SR30_H3.C1d_01519	SR31_H3.C2a_01523			SR34_H3.C3b_01519	SR35_H3.C3c_01520		SR37_H3.C5_01522	SR38_H3.C6a_01518	SR39_H3.C6b_01391	SR3_H1.C2_00930	SR40_H3.C7a_01274	SR41_H3.C7b_01563	SR42_H3.C8a_01274
group_563		hypothetical protein	56	56	1	104	55	104	113		179	179	179	SR10_H1.C6a_01910		SR12_H1.C7a_01923	SR13_H1.C7b_00931	SR14_H1.C7c_01913	SR15_H1.C8_00929	SR16_H1.C9a_01046	SR17_H1.C9b_01033	SR18_H1.C10_01044	SR19_H1.C11_01043		SR20_H1.C12_01912	SR21_H1.C13_01034	SR22_H1.C14_00930	SR23_H1.C15a_01912	SR24_H1.C15b_00931	SR25_H1.C16_01044	SR26_H2.C1_00682	SR27_H3.C1a_01521	SR28_H3.C1b_01522	SR29_H3.C1c_01566	SR2_H1.C1b_01043	SR30_H3.C1d_01520	SR31_H3.C2a_01524			SR34_H3.C3b_01520	SR35_H3.C3c_01521		SR37_H3.C5_01523	SR38_H3.C6a_01519	SR39_H3.C6b_01390	SR3_H1.C2_00931	SR40_H3.C7a_01273	SR41_H3.C7b_01564	SR42_H3.C8a_01273
group_401		N-acetylmuramoyl-L-alanine amidase	55	55	1	104	27	104	85		1388	1388	1388	SR10_H1.C6a_01886		SR12_H1.C7a_01947	SR13_H1.C7b_00907	SR14_H1.C7c_01889	SR15_H1.C8_00906	SR16_H1.C9a_01022	SR17_H1.C9b_01057	SR18_H1.C10_01020	SR19_H1.C11_01019		SR20_H1.C12_01888	SR21_H1.C13_01058	SR22_H1.C14_00907	SR23_H1.C15a_01889	SR24_H1.C15b_00907	SR25_H1.C16_01020	SR26_H2.C1_00658	SR27_H3.C1a_01497	SR28_H3.C1b_01498	SR29_H3.C1c_01542	SR2_H1.C1b_01018	SR30_H3.C1d_01496	SR31_H3.C2a_01500			SR34_H3.C3b_01496	SR35_H3.C3c_01497		SR37_H3.C5_01499	SR38_H3.C6a_01495	SR39_H3.C6b_01414	SR3_H1.C2_00907	SR40_H3.C7a_01297	SR41_H3.C7b_01540	SR42_H3.C8a_01297
group_416		hypothetical protein	55	55	1	104	110	104	26		215	230	221	SR10_H1.C6a_01940		SR12_H1.C7a_01893	SR13_H1.C7b_00961	SR14_H1.C7c_01943	SR15_H1.C8_00959	SR16_H1.C9a_01076	SR17_H1.C9b_01003	SR18_H1.C10_01073	SR19_H1.C11_01073		SR20_H1.C12_01942	SR21_H1.C13_01004	SR22_H1.C14_00960	SR23_H1.C15a_01942	SR24_H1.C15b_00961	SR25_H1.C16_01074	SR26_H2.C1_00708	SR27_H3.C1a_01623	SR28_H3.C1b_01624	SR29_H3.C1c_01578	SR2_H1.C1b_01072	SR30_H3.C1d_01622	SR31_H3.C2a_01627			SR34_H3.C3b_01532	SR35_H3.C3c_01623		SR37_H3.C5_01535	SR38_H3.C6a_01621	SR39_H3.C6b_01620	SR3_H1.C2_00961	SR40_H3.C7a_01526	SR41_H3.C7b_01576	SR42_H3.C8a_01526
group_417		hypothetical protein	55	55	1	104	107	104	24		221	221	221	SR10_H1.C6a_01942		SR12_H1.C7a_01891	SR13_H1.C7b_00963	SR14_H1.C7c_01945	SR15_H1.C8_00961	SR16_H1.C9a_01078	SR17_H1.C9b_01001	SR18_H1.C10_01075	SR19_H1.C11_01075		SR20_H1.C12_01944	SR21_H1.C13_01002	SR22_H1.C14_00962	SR23_H1.C15a_01944	SR24_H1.C15b_00963	SR25_H1.C16_01076	SR26_H2.C1_00710	SR27_H3.C1a_01621	SR28_H3.C1b_01622	SR29_H3.C1c_01580	SR2_H1.C1b_01074	SR30_H3.C1d_01620	SR31_H3.C2a_01625			SR34_H3.C3b_01534	SR35_H3.C3c_01621		SR37_H3.C5_01537	SR38_H3.C6a_01619	SR39_H3.C6b_01618	SR3_H1.C2_00963	SR40_H3.C7a_01528	SR41_H3.C7b_01578	SR42_H3.C8a_01528
group_418		hypothetical protein	55	55	1	104	103	104	19		344	671	665	SR10_H1.C6a_01946		SR12_H1.C7a_01887	SR13_H1.C7b_00967	SR14_H1.C7c_01949	SR15_H1.C8_00965	SR16_H1.C9a_01082	SR17_H1.C9b_00997	SR18_H1.C10_01079	SR19_H1.C11_01079		SR20_H1.C12_01948	SR21_H1.C13_00998	SR22_H1.C14_00966	SR23_H1.C15a_01948	SR24_H1.C15b_00967	SR25_H1.C16_01080	SR26_H2.C1_00714	SR27_H3.C1a_01617	SR28_H3.C1b_01618	SR29_H3.C1c_01584	SR2_H1.C1b_01078	SR30_H3.C1d_01616	SR31_H3.C2a_01621			SR34_H3.C3b_01538	SR35_H3.C3c_01617		SR37_H3.C5_01541	SR38_H3.C6a_01615	SR39_H3.C6b_01614	SR3_H1.C2_00967	SR40_H3.C7a_01532	SR41_H3.C7b_01582	SR42_H3.C8a_01532
group_420		hypothetical protein	55	55	1	104	100	104	12		581	581	581	SR10_H1.C6a_01949		SR12_H1.C7a_01884	SR13_H1.C7b_00970	SR14_H1.C7c_01952	SR15_H1.C8_00968	SR16_H1.C9a_01085	SR17_H1.C9b_00994	SR18_H1.C10_01082	SR19_H1.C11_01082		SR20_H1.C12_01951	SR21_H1.C13_00995	SR22_H1.C14_00969	SR23_H1.C15a_01951	SR24_H1.C15b_00970	SR25_H1.C16_01083	SR26_H2.C1_00717	SR27_H3.C1a_01614	SR28_H3.C1b_01615	SR29_H3.C1c_01587	SR2_H1.C1b_01081	SR30_H3.C1d_01613	SR31_H3.C2a_01618			SR34_H3.C3b_01541	SR35_H3.C3c_01614		SR37_H3.C5_01544	SR38_H3.C6a_01612	SR39_H3.C6b_01611	SR3_H1.C2_00970	SR40_H3.C7a_01535	SR41_H3.C7b_01585	SR42_H3.C8a_01535
group_46		phage tail tape measure protein	55	55	1	104	36	104	93		3266	4295	4257	SR10_H1.C6a_01893		SR12_H1.C7a_01940	SR13_H1.C7b_00914	SR14_H1.C7c_01896	SR15_H1.C8_00913	SR16_H1.C9a_01029	SR17_H1.C9b_01050	SR18_H1.C10_01027	SR19_H1.C11_01026		SR20_H1.C12_01895	SR21_H1.C13_01051	SR22_H1.C14_00914	SR23_H1.C15a_01896	SR24_H1.C15b_00914	SR25_H1.C16_01027	SR26_H2.C1_00665	SR27_H3.C1a_01504	SR28_H3.C1b_01505	SR29_H3.C1c_01549	SR2_H1.C1b_01025	SR30_H3.C1d_01503	SR31_H3.C2a_01507			SR34_H3.C3b_01503	SR35_H3.C3c_01504		SR37_H3.C5_01506	SR38_H3.C6a_01502	SR39_H3.C6b_01407	SR3_H1.C2_00914	SR40_H3.C7a_01290	SR41_H3.C7b_01547	SR42_H3.C8a_01290
group_547		phage holin	55	55	1	104	28	104	86		305	305	305	SR10_H1.C6a_01887		SR12_H1.C7a_01946	SR13_H1.C7b_00908	SR14_H1.C7c_01890	SR15_H1.C8_00907	SR16_H1.C9a_01023	SR17_H1.C9b_01056	SR18_H1.C10_01021	SR19_H1.C11_01020		SR20_H1.C12_01889	SR21_H1.C13_01057	SR22_H1.C14_00908	SR23_H1.C15a_01890	SR24_H1.C15b_00908	SR25_H1.C16_01021	SR26_H2.C1_00659	SR27_H3.C1a_01498	SR28_H3.C1b_01499	SR29_H3.C1c_01543	SR2_H1.C1b_01019	SR30_H3.C1d_01497	SR31_H3.C2a_01501			SR34_H3.C3b_01497	SR35_H3.C3c_01498		SR37_H3.C5_01500	SR38_H3.C6a_01496	SR39_H3.C6b_01413	SR3_H1.C2_00908	SR40_H3.C7a_01296	SR41_H3.C7b_01541	SR42_H3.C8a_01296
group_551		phage tail family protein	55	55	1	104	33	104	91		1508	1508	1508	SR10_H1.C6a_01892		SR12_H1.C7a_01941	SR13_H1.C7b_00913	SR14_H1.C7c_01895	SR15_H1.C8_00912	SR16_H1.C9a_01028	SR17_H1.C9b_01051	SR18_H1.C10_01026	SR19_H1.C11_01025		SR20_H1.C12_01894	SR21_H1.C13_01052	SR22_H1.C14_00913	SR23_H1.C15a_01895	SR24_H1.C15b_00913	SR25_H1.C16_01026	SR26_H2.C1_00664	SR27_H3.C1a_01503	SR28_H3.C1b_01504	SR29_H3.C1c_01548	SR2_H1.C1b_01024	SR30_H3.C1d_01502	SR31_H3.C2a_01506			SR34_H3.C3b_01502	SR35_H3.C3c_01503		SR37_H3.C5_01505	SR38_H3.C6a_01501	SR39_H3.C6b_01408	SR3_H1.C2_00913	SR40_H3.C7a_01291	SR41_H3.C7b_01546	SR42_H3.C8a_01291
group_578		hypothetical protein	55	55	1	104	108	104	25		182	182	182	SR10_H1.C6a_01941		SR12_H1.C7a_01892	SR13_H1.C7b_00962	SR14_H1.C7c_01944	SR15_H1.C8_00960	SR16_H1.C9a_01077	SR17_H1.C9b_01002	SR18_H1.C10_01074	SR19_H1.C11_01074		SR20_H1.C12_01943	SR21_H1.C13_01003	SR22_H1.C14_00961	SR23_H1.C15a_01943	SR24_H1.C15b_00962	SR25_H1.C16_01075	SR26_H2.C1_00709	SR27_H3.C1a_01622	SR28_H3.C1b_01623	SR29_H3.C1c_01579	SR2_H1.C1b_01073	SR30_H3.C1d_01621	SR31_H3.C2a_01626			SR34_H3.C3b_01533	SR35_H3.C3c_01622		SR37_H3.C5_01536	SR38_H3.C6a_01620	SR39_H3.C6b_01619	SR3_H1.C2_00962	SR40_H3.C7a_01527	SR41_H3.C7b_01577	SR42_H3.C8a_01527
group_580		hypothetical protein	55	55	1	104	105	104	22		194	194	194	SR10_H1.C6a_01944		SR12_H1.C7a_01889	SR13_H1.C7b_00965	SR14_H1.C7c_01947	SR15_H1.C8_00963	SR16_H1.C9a_01080	SR17_H1.C9b_00999	SR18_H1.C10_01077	SR19_H1.C11_01077		SR20_H1.C12_01946	SR21_H1.C13_01000	SR22_H1.C14_00964	SR23_H1.C15a_01946	SR24_H1.C15b_00965	SR25_H1.C16_01078	SR26_H2.C1_00712	SR27_H3.C1a_01619	SR28_H3.C1b_01620	SR29_H3.C1c_01582	SR2_H1.C1b_01076	SR30_H3.C1d_01618	SR31_H3.C2a_01623			SR34_H3.C3b_01536	SR35_H3.C3c_01619		SR37_H3.C5_01539	SR38_H3.C6a_01617	SR39_H3.C6b_01616	SR3_H1.C2_00965	SR40_H3.C7a_01530	SR41_H3.C7b_01580	SR42_H3.C8a_01530
group_581		hypothetical protein	55	55	1	104	104	104	21		332	332	332	SR10_H1.C6a_01945		SR12_H1.C7a_01888	SR13_H1.C7b_00966	SR14_H1.C7c_01948	SR15_H1.C8_00964	SR16_H1.C9a_01081	SR17_H1.C9b_00998	SR18_H1.C10_01078	SR19_H1.C11_01078		SR20_H1.C12_01947	SR21_H1.C13_00999	SR22_H1.C14_00965	SR23_H1.C15a_01947	SR24_H1.C15b_00966	SR25_H1.C16_01079	SR26_H2.C1_00713	SR27_H3.C1a_01618	SR28_H3.C1b_01619	SR29_H3.C1c_01583	SR2_H1.C1b_01077	SR30_H3.C1d_01617	SR31_H3.C2a_01622			SR34_H3.C3b_01537	SR35_H3.C3c_01618		SR37_H3.C5_01540	SR38_H3.C6a_01616	SR39_H3.C6b_01615	SR3_H1.C2_00966	SR40_H3.C7a_01531	SR41_H3.C7b_01581	SR42_H3.C8a_01531
group_582		hypothetical protein	55	55	1	104	102	104	18		614	614	614	SR10_H1.C6a_01947		SR12_H1.C7a_01886	SR13_H1.C7b_00968	SR14_H1.C7c_01950	SR15_H1.C8_00966	SR16_H1.C9a_01083	SR17_H1.C9b_00996	SR18_H1.C10_01080	SR19_H1.C11_01080		SR20_H1.C12_01949	SR21_H1.C13_00997	SR22_H1.C14_00967	SR23_H1.C15a_01949	SR24_H1.C15b_00968	SR25_H1.C16_01081	SR26_H2.C1_00715	SR27_H3.C1a_01616	SR28_H3.C1b_01617	SR29_H3.C1c_01585	SR2_H1.C1b_01079	SR30_H3.C1d_01615	SR31_H3.C2a_01620			SR34_H3.C3b_01539	SR35_H3.C3c_01616		SR37_H3.C5_01542	SR38_H3.C6a_01614	SR39_H3.C6b_01613	SR3_H1.C2_00968	SR40_H3.C7a_01533	SR41_H3.C7b_01583	SR42_H3.C8a_01533
group_158		anthranilate synthase component I	54	54	1	104	164	104	197		989	1403	1211	SR10_H1.C6a_00645	SR11_H1.C6b_00789	SR12_H1.C7a_00791	SR13_H1.C7b_00533	SR14_H1.C7c_00791	SR15_H1.C8_00790	SR16_H1.C9a_00793	SR17_H1.C9b_00645	SR18_H1.C10_00791	SR19_H1.C11_00790	SR1_H1.C1a_00790	SR20_H1.C12_00532	SR21_H1.C13_00791	SR22_H1.C14_00791	SR23_H1.C15a_00791	SR24_H1.C15b_00532	SR25_H1.C16_00791		SR27_H3.C1a_00182	SR28_H3.C1b_00182	SR29_H3.C1c_00183	SR2_H1.C1b_00645	SR30_H3.C1d_00238	SR31_H3.C2a_00239	SR32_H3.C2b_00239	SR33_H3.C3a_00183	SR34_H3.C3b_00182	SR35_H3.C3c_00182	SR36_H3.C4_00240	SR37_H3.C5_00182	SR38_H3.C6a_00182	SR39_H3.C6b_00182	SR3_H1.C2_00532	SR40_H3.C7a_00239	SR41_H3.C7b_00182	SR42_H3.C8a_00067
group_579		hypothetical protein	54	54	1	104	106	104	23		782	782	782	SR10_H1.C6a_01943		SR12_H1.C7a_01890	SR13_H1.C7b_00964	SR14_H1.C7c_01946	SR15_H1.C8_00962	SR16_H1.C9a_01079	SR17_H1.C9b_01000	SR18_H1.C10_01076	SR19_H1.C11_01076		SR20_H1.C12_01945	SR21_H1.C13_01001	SR22_H1.C14_00963	SR23_H1.C15a_01945	SR24_H1.C15b_00964	SR25_H1.C16_01077	SR26_H2.C1_00711	SR27_H3.C1a_01620	SR28_H3.C1b_01621	SR29_H3.C1c_01581	SR2_H1.C1b_01075	SR30_H3.C1d_01619	SR31_H3.C2a_01624			SR34_H3.C3b_01535	SR35_H3.C3c_01620		SR37_H3.C5_01538	SR38_H3.C6a_01618	SR39_H3.C6b_01617	SR3_H1.C2_00964	SR40_H3.C7a_01529	SR41_H3.C7b_01579	SR42_H3.C8a_01529
group_668		hypothetical protein	54	54	1	104	78	104	65	Hypothetical protein with no hits to refseq/uniprot/clusters/cdd/tigrfams/pfam overlapping another protein with hits	155	155	155																		SR26_H2.C1_00704	SR27_H3.C1a_02305	SR28_H3.C1b_02306	SR29_H3.C1c_02302		SR30_H3.C1d_02303	SR31_H3.C2a_01631	SR32_H3.C2b_02226	SR33_H3.C3a_02228	SR34_H3.C3b_02305	SR35_H3.C3c_02298	SR36_H3.C4_02063	SR37_H3.C5_02306	SR38_H3.C6a_02303	SR39_H3.C6b_02305		SR40_H3.C7a_02287	SR41_H3.C7b_02308	SR42_H3.C8a_02343
group_690		hypothetical protein	53	53	1	104	209	104	160		524	524	524																			SR27_H3.C1a_02012	SR28_H3.C1b_02013	SR29_H3.C1c_02014		SR30_H3.C1d_02101	SR31_H3.C2a_02017	SR32_H3.C2b_02054	SR33_H3.C3a_01965	SR34_H3.C3b_02010	SR35_H3.C3c_02090	SR36_H3.C4_02018	SR37_H3.C5_02014	SR38_H3.C6a_02009	SR39_H3.C6b_02066		SR40_H3.C7a_02090	SR41_H3.C7b_02069	SR42_H3.C8a_02145
group_43		XcbB/CpsF family capsular polysaccharide biosynthesis protein	52	52	1	104	97	104	11		272	1745	1017	SR10_H1.C6a_01762	SR11_H1.C6b_00994	SR12_H1.C7a_01763	SR13_H1.C7b_01049	SR14_H1.C7c_01765	SR15_H1.C8_01046	SR16_H1.C9a_01164	SR17_H1.C9b_00916	SR18_H1.C10_01161	SR19_H1.C11_01161	SR1_H1.C1a_01172	SR20_H1.C12_01763	SR21_H1.C13_00916	SR22_H1.C14_01047	SR23_H1.C15a_01806	SR24_H1.C15b_01048	SR25_H1.C16_01161		SR27_H3.C1a_01538	SR28_H3.C1b_01539	SR29_H3.C1c_01663	SR2_H1.C1b_01160	SR30_H3.C1d_01537	SR31_H3.C2a_01541	SR32_H3.C2b_01105	SR33_H3.C3a_00706	SR34_H3.C3b_01617	SR35_H3.C3c_01538	SR36_H3.C4_01109	SR37_H3.C5_01621	SR38_H3.C6a_01536	SR39_H3.C6b_01535	SR3_H1.C2_01049	SR40_H3.C7a_01611	SR41_H3.C7b_01661	SR42_H3.C8a_01612
group_464		hypothetical protein	52	52	1	104	71	104	58		218	218	218																			SR27_H3.C1a_02294	SR28_H3.C1b_02295	SR29_H3.C1c_02287		SR30_H3.C1d_02290	SR31_H3.C2a_02293	SR32_H3.C2b_02232	SR33_H3.C3a_02234	SR34_H3.C3b_02292	SR35_H3.C3c_02280	SR36_H3.C4_02069	SR37_H3.C5_02295	SR38_H3.C6a_02291	SR39_H3.C6b_02292		SR40_H3.C7a_02270	SR41_H3.C7b_02294	SR42_H3.C8a_02329
group_465		hypothetical protein	52	52	1	104	73	104	60		242	242	242																			SR27_H3.C1a_02296	SR28_H3.C1b_02297	SR29_H3.C1c_02285		SR30_H3.C1d_02292	SR31_H3.C2a_02295	SR32_H3.C2b_02230	SR33_H3.C3a_02232	SR34_H3.C3b_02294	SR35_H3.C3c_02282	SR36_H3.C4_02067	SR37_H3.C5_02297	SR38_H3.C6a_02293	SR39_H3.C6b_02294		SR40_H3.C7a_02272	SR41_H3.C7b_02296	SR42_H3.C8a_02331
group_705		hypothetical protein	52	52	1	104	219	104	169		320	320	320																			SR27_H3.C1a_02046	SR28_H3.C1b_02047	SR29_H3.C1c_02048		SR30_H3.C1d_02222	SR31_H3.C2a_02051	SR32_H3.C2b_02176	SR33_H3.C3a_01998	SR34_H3.C3b_02044	SR35_H3.C3c_02212	SR36_H3.C4_02274	SR37_H3.C5_02048	SR38_H3.C6a_02043	SR39_H3.C6b_02032		SR40_H3.C7a_02056	SR41_H3.C7b_02035	SR42_H3.C8a_02111
group_727		VRR-NUC domain-containing protein	52	52	1	104	84	104	71		308	308	308																			SR27_H3.C1a_02283	SR28_H3.C1b_02288	SR29_H3.C1c_02279		SR30_H3.C1d_02283	SR31_H3.C2a_02282	SR32_H3.C2b_02220	SR33_H3.C3a_02222	SR34_H3.C3b_02285	SR35_H3.C3c_02269	SR36_H3.C4_02057	SR37_H3.C5_02285	SR38_H3.C6a_02280	SR39_H3.C6b_02281		SR40_H3.C7a_02257	SR41_H3.C7b_02283	SR42_H3.C8a_02318
group_728		hypothetical protein	52	52	1	104	83	104	70		2312	2312	2312																			SR27_H3.C1a_02284	SR28_H3.C1b_02287	SR29_H3.C1c_02280		SR30_H3.C1d_02282	SR31_H3.C2a_02283	SR32_H3.C2b_02221	SR33_H3.C3a_02223	SR34_H3.C3b_02284	SR35_H3.C3c_02270	SR36_H3.C4_02058	SR37_H3.C5_02286	SR38_H3.C6a_02281	SR39_H3.C6b_02282		SR40_H3.C7a_02258	SR41_H3.C7b_02284	SR42_H3.C8a_02319
group_729		hypothetical protein	52	52	1	104	82	104	69		500	500	500																			SR27_H3.C1a_02285	SR28_H3.C1b_02286	SR29_H3.C1c_02281		SR30_H3.C1d_02281	SR31_H3.C2a_02284	SR32_H3.C2b_02222	SR33_H3.C3a_02224	SR34_H3.C3b_02283	SR35_H3.C3c_02271	SR36_H3.C4_02059	SR37_H3.C5_02287	SR38_H3.C6a_02282	SR39_H3.C6b_02283		SR40_H3.C7a_02259	SR41_H3.C7b_02285	SR42_H3.C8a_02320
group_731		PH domain-containing protein	52	52	1	104	65	104	52		725	725	725																			SR27_H3.C1a_02288	SR28_H3.C1b_02289	SR29_H3.C1c_02293		SR30_H3.C1d_02284	SR31_H3.C2a_02287	SR32_H3.C2b_02237	SR33_H3.C3a_02240	SR34_H3.C3b_02286	SR35_H3.C3c_02274	SR36_H3.C4_02074	SR37_H3.C5_02290	SR38_H3.C6a_02285	SR39_H3.C6b_02286		SR40_H3.C7a_02264	SR41_H3.C7b_02288	SR42_H3.C8a_02323
group_733		hypothetical protein	52	52	1	104	67	104	54		470	470	470																			SR27_H3.C1a_02290	SR28_H3.C1b_02291	SR29_H3.C1c_02291		SR30_H3.C1d_02286	SR31_H3.C2a_02289	SR32_H3.C2b_02236	SR33_H3.C3a_02238	SR34_H3.C3b_02288	SR35_H3.C3c_02276	SR36_H3.C4_02073	SR37_H3.C5_02291	SR38_H3.C6a_02287	SR39_H3.C6b_02288		SR40_H3.C7a_02266	SR41_H3.C7b_02290	SR42_H3.C8a_02325
group_734		hypothetical protein	52	52	1	104	68	104	55		314	314	314																			SR27_H3.C1a_02291	SR28_H3.C1b_02292	SR29_H3.C1c_02290		SR30_H3.C1d_02287	SR31_H3.C2a_02290	SR32_H3.C2b_02235	SR33_H3.C3a_02237	SR34_H3.C3b_02289	SR35_H3.C3c_02277	SR36_H3.C4_02072	SR37_H3.C5_02292	SR38_H3.C6a_02288	SR39_H3.C6b_02289		SR40_H3.C7a_02267	SR41_H3.C7b_02291	SR42_H3.C8a_02326
group_735		hypothetical protein	52	52	1	104	69	104	56		212	212	212																			SR27_H3.C1a_02292	SR28_H3.C1b_02293	SR29_H3.C1c_02289		SR30_H3.C1d_02288	SR31_H3.C2a_02291	SR32_H3.C2b_02234	SR33_H3.C3a_02236	SR34_H3.C3b_02290	SR35_H3.C3c_02278	SR36_H3.C4_02071	SR37_H3.C5_02293	SR38_H3.C6a_02289	SR39_H3.C6b_02290		SR40_H3.C7a_02268	SR41_H3.C7b_02292	SR42_H3.C8a_02327
group_736		hypothetical protein	52	52	1	104	70	104	57		194	194	194																			SR27_H3.C1a_02293	SR28_H3.C1b_02294	SR29_H3.C1c_02288		SR30_H3.C1d_02289	SR31_H3.C2a_02292	SR32_H3.C2b_02233	SR33_H3.C3a_02235	SR34_H3.C3b_02291	SR35_H3.C3c_02279	SR36_H3.C4_02070	SR37_H3.C5_02294	SR38_H3.C6a_02290	SR39_H3.C6b_02291		SR40_H3.C7a_02269	SR41_H3.C7b_02293	SR42_H3.C8a_02328
group_737		hypothetical protein	52	52	1	104	72	104	59		194	194	194																			SR27_H3.C1a_02295	SR28_H3.C1b_02296	SR29_H3.C1c_02286		SR30_H3.C1d_02291	SR31_H3.C2a_02294	SR32_H3.C2b_02231	SR33_H3.C3a_02233	SR34_H3.C3b_02293	SR35_H3.C3c_02281	SR36_H3.C4_02068	SR37_H3.C5_02296	SR38_H3.C6a_02292	SR39_H3.C6b_02293		SR40_H3.C7a_02271	SR41_H3.C7b_02295	SR42_H3.C8a_02330
group_738		hypothetical protein	52	52	1	104	74	104	61		140	140	140																			SR27_H3.C1a_02297	SR28_H3.C1b_02298	SR29_H3.C1c_02284		SR30_H3.C1d_02293	SR31_H3.C2a_02296	SR32_H3.C2b_02229	SR33_H3.C3a_02231	SR34_H3.C3b_02295	SR35_H3.C3c_02283	SR36_H3.C4_02066	SR37_H3.C5_02298	SR38_H3.C6a_02294	SR39_H3.C6b_02295		SR40_H3.C7a_02273	SR41_H3.C7b_02297	SR42_H3.C8a_02332
radD_2		Putative DNA repair helicase RadD	52	52	1	104	81	104	68		1331	1331	1331																			SR27_H3.C1a_02286	SR28_H3.C1b_02285	SR29_H3.C1c_02282		SR30_H3.C1d_02280	SR31_H3.C2a_02285	SR32_H3.C2b_02223	SR33_H3.C3a_02225	SR34_H3.C3b_02282	SR35_H3.C3c_02272	SR36_H3.C4_02060	SR37_H3.C5_02288	SR38_H3.C6a_02283	SR39_H3.C6b_02284		SR40_H3.C7a_02260	SR41_H3.C7b_02286	SR42_H3.C8a_02321
group_313		phage head-tail adapter protein	51	51	1	104	212	104	162		335	335	335																			SR27_H3.C1a_02030	SR28_H3.C1b_02031	SR29_H3.C1c_02032		SR30_H3.C1d_02119	SR31_H3.C2a_02035	SR32_H3.C2b_02072	SR33_H3.C3a_01982	SR34_H3.C3b_02028	SR35_H3.C3c_02108	SR36_H3.C4_02036	SR37_H3.C5_02032	SR38_H3.C6a_02027	SR39_H3.C6b_02048		SR40_H3.C7a_02072	SR41_H3.C7b_02051	SR42_H3.C8a_02127
group_56		hypothetical protein	51	51	1	104	80	104	67	Hypothetical protein with no hits to refseq/uniprot/clusters/cdd/tigrfams/pfam overlapping another protein with hits	158	704	393																			SR27_H3.C1a_02287	SR28_H3.C1b_02284	SR29_H3.C1c_02283		SR30_H3.C1d_02279	SR31_H3.C2a_02286	SR32_H3.C2b_02224	SR33_H3.C3a_02226	SR34_H3.C3b_02281	SR35_H3.C3c_02273	SR36_H3.C4_02061	SR37_H3.C5_02289	SR38_H3.C6a_02284	SR39_H3.C6b_02285		SR40_H3.C7a_02261	SR41_H3.C7b_02287	SR42_H3.C8a_02322
group_560		hypothetical protein	51	51	1	104	52	104	110		365	365	365	SR10_H1.C6a_01907		SR12_H1.C7a_01926	SR13_H1.C7b_00928	SR14_H1.C7c_01910		SR16_H1.C9a_01043	SR17_H1.C9b_01036	SR18_H1.C10_01041	SR19_H1.C11_01040		SR20_H1.C12_01909	SR21_H1.C13_01037			SR24_H1.C15b_00928	SR25_H1.C16_01041	SR26_H2.C1_00679	SR27_H3.C1a_01518	SR28_H3.C1b_01519	SR29_H3.C1c_01563	SR2_H1.C1b_01040	SR30_H3.C1d_01517	SR31_H3.C2a_01521			SR34_H3.C3b_01517	SR35_H3.C3c_01518		SR37_H3.C5_01520	SR38_H3.C6a_01516	SR39_H3.C6b_01393	SR3_H1.C2_00928	SR40_H3.C7a_01276	SR41_H3.C7b_01561	SR42_H3.C8a_01276
group_689		hypothetical protein	51	51	1	104	208	104	158		425	425	425																			SR27_H3.C1a_02011	SR28_H3.C1b_02012	SR29_H3.C1c_02013		SR30_H3.C1d_02100	SR31_H3.C2a_02016	SR32_H3.C2b_02053	SR33_H3.C3a_01964	SR34_H3.C3b_02009	SR35_H3.C3c_02089	SR36_H3.C4_02017	SR37_H3.C5_02013	SR38_H3.C6a_02008	SR39_H3.C6b_02067		SR40_H3.C7a_02091	SR41_H3.C7b_02070	SR42_H3.C8a_02146
group_698		hypothetical protein	51	51	1	104	213	104	163		350	350	350																			SR27_H3.C1a_02031	SR28_H3.C1b_02032	SR29_H3.C1c_02033		SR30_H3.C1d_02120	SR31_H3.C2a_02036	SR32_H3.C2b_02073	SR33_H3.C3a_01983	SR34_H3.C3b_02029	SR35_H3.C3c_02109	SR36_H3.C4_02037	SR37_H3.C5_02033	SR38_H3.C6a_02028	SR39_H3.C6b_02047		SR40_H3.C7a_02071	SR41_H3.C7b_02050	SR42_H3.C8a_02126
group_699		hypothetical protein	51	51	1	104	214	104	164		143	143	143																			SR27_H3.C1a_02032	SR28_H3.C1b_02033	SR29_H3.C1c_02034		SR30_H3.C1d_02121	SR31_H3.C2a_02037	SR32_H3.C2b_02074	SR33_H3.C3a_01984	SR34_H3.C3b_02030	SR35_H3.C3c_02110	SR36_H3.C4_02038	SR37_H3.C5_02034	SR38_H3.C6a_02029	SR39_H3.C6b_02046		SR40_H3.C7a_02070	SR41_H3.C7b_02049	SR42_H3.C8a_02125
group_701		hypothetical protein	51	51	1	104	216	104	166		584	584	584																			SR27_H3.C1a_02034	SR28_H3.C1b_02035	SR29_H3.C1c_02036		SR30_H3.C1d_02122	SR31_H3.C2a_02039	SR32_H3.C2b_02076	SR33_H3.C3a_01986	SR34_H3.C3b_02032	SR35_H3.C3c_02112	SR36_H3.C4_02040	SR37_H3.C5_02036	SR38_H3.C6a_02031	SR39_H3.C6b_02044		SR40_H3.C7a_02068	SR41_H3.C7b_02047	SR42_H3.C8a_02123
group_456		phage portal protein	50	50	1	104	218	104	168		1187	1415	1405																			SR27_H3.C1a_02036	SR28_H3.C1b_02037	SR29_H3.C1c_02038		SR30_H3.C1d_02124	SR31_H3.C2a_02041	SR32_H3.C2b_02078	SR33_H3.C3a_01988	SR34_H3.C3b_02034	SR35_H3.C3c_02114	SR36_H3.C4_02042	SR37_H3.C5_02038	SR38_H3.C6a_02033	SR39_H3.C6b_02042		SR40_H3.C7a_02066	SR41_H3.C7b_02045	SR42_H3.C8a_02121
group_700		hypothetical protein	50	50	1	104	215	104	165		914	914	914																			SR27_H3.C1a_02033	SR28_H3.C1b_02034	SR29_H3.C1c_02035			SR31_H3.C2a_02038	SR32_H3.C2b_02075	SR33_H3.C3a_01985	SR34_H3.C3b_02031	SR35_H3.C3c_02111	SR36_H3.C4_02039	SR37_H3.C5_02035	SR38_H3.C6a_02030	SR39_H3.C6b_02045		SR40_H3.C7a_02069	SR41_H3.C7b_02048	SR42_H3.C8a_02124
group_702		phage head morphogenesis protein	50	50	1	104	217	104	167		941	941	941																			SR27_H3.C1a_02035	SR28_H3.C1b_02036	SR29_H3.C1c_02037		SR30_H3.C1d_02123	SR31_H3.C2a_02040	SR32_H3.C2b_02077	SR33_H3.C3a_01987	SR34_H3.C3b_02033	SR35_H3.C3c_02113	SR36_H3.C4_02041	SR37_H3.C5_02037	SR38_H3.C6a_02032	SR39_H3.C6b_02043		SR40_H3.C7a_02067	SR41_H3.C7b_02046	SR42_H3.C8a_02122
group_568		hypothetical protein	47	47	1	104	223	104	135		335	335	335	SR10_H1.C6a_01916		SR12_H1.C7a_01917	SR13_H1.C7b_00937	SR14_H1.C7c_01919	SR15_H1.C8_00935	SR16_H1.C9a_01052	SR17_H1.C9b_01027	SR18_H1.C10_01050	SR19_H1.C11_01049		SR20_H1.C12_01918	SR21_H1.C13_01028	SR22_H1.C14_00936	SR23_H1.C15a_01918	SR24_H1.C15b_00937	SR25_H1.C16_01050	SR26_H2.C1_00688	SR27_H3.C1a_01527	SR28_H3.C1b_01528	SR29_H3.C1c_01572	SR2_H1.C1b_01049	SR30_H3.C1d_01526	SR31_H3.C2a_01530			SR34_H3.C3b_01526	SR35_H3.C3c_01527		SR37_H3.C5_01529	SR38_H3.C6a_01525	SR39_H3.C6b_01384	SR3_H1.C2_00937	SR40_H3.C7a_01267	SR41_H3.C7b_01570	SR42_H3.C8a_01267
group_604		hypothetical protein	45	45	1	104	146	104	180		116	116	116		SR11_H1.C6b_00718	SR12_H1.C7a_00719	SR13_H1.C7b_00604	SR14_H1.C7c_00719	SR15_H1.C8_00719	SR16_H1.C9a_00721	SR17_H1.C9b_00717	SR18_H1.C10_00719	SR19_H1.C11_00719	SR1_H1.C1a_00719		SR21_H1.C13_00719		SR23_H1.C15a_00719		SR25_H1.C16_00719				SR29_H3.C1c_00254					SR33_H3.C3a_00254			SR36_H3.C4_00169				SR3_H1.C2_00604	SR40_H3.C7a_00168	SR41_H3.C7b_00253
group_156		helix-turn-helix domain-containing protein	43	43	1	104	163	104	196		1616	2030	2020	SR10_H1.C6a_00640		SR12_H1.C7a_00796				SR16_H1.C9a_00798	SR17_H1.C9b_00640	SR18_H1.C10_00796	SR19_H1.C11_00795			SR21_H1.C13_00796				SR25_H1.C16_00796		SR27_H3.C1a_00177	SR28_H3.C1b_00177	SR29_H3.C1c_00178	SR2_H1.C1b_00640	SR30_H3.C1d_00243	SR31_H3.C2a_00244	SR32_H3.C2b_00244	SR33_H3.C3a_00178	SR34_H3.C3b_00177	SR35_H3.C3c_00177	SR36_H3.C4_00245	SR37_H3.C5_00177	SR38_H3.C6a_00177	SR39_H3.C6b_00177		SR40_H3.C7a_00244	SR41_H3.C7b_00177	SR42_H3.C8a_00062
group_408		hypothetical protein	43	43	1	104	220	104	140		113	212	140	SR10_H1.C6a_01920		SR12_H1.C7a_01913	SR13_H1.C7b_00941	SR14_H1.C7c_01923	SR15_H1.C8_00939	SR16_H1.C9a_01056	SR17_H1.C9b_01023	SR18_H1.C10_01054	SR19_H1.C11_01053		SR20_H1.C12_01922	SR21_H1.C13_01024	SR22_H1.C14_00940	SR23_H1.C15a_01922	SR24_H1.C15b_00941	SR25_H1.C16_01054					SR2_H1.C1b_01053			SR32_H3.C2b_02216	SR33_H3.C3a_02218			SR36_H3.C4_02053				SR3_H1.C2_00941
group_576		hypothetical protein	42	42	1	104	112	104	28		170	173	171	SR10_H1.C6a_01937		SR12_H1.C7a_01896	SR13_H1.C7b_00958	SR14_H1.C7c_01940	SR15_H1.C8_00956	SR16_H1.C9a_01073	SR17_H1.C9b_01006	SR18_H1.C10_01070	SR19_H1.C11_01070		SR20_H1.C12_01939	SR21_H1.C13_01007	SR22_H1.C14_00957	SR23_H1.C15a_01939	SR24_H1.C15b_00958	SR25_H1.C16_01071	SR26_H2.C1_00705	SR27_H3.C1a_01626	SR28_H3.C1b_01627	SR29_H3.C1c_01575	SR2_H1.C1b_01069	SR30_H3.C1d_01625	SR31_H3.C2a_01630			SR34_H3.C3b_01529	SR35_H3.C3c_01626		SR37_H3.C5_01532	SR38_H3.C6a_01624	SR39_H3.C6b_01623	SR3_H1.C2_00958		SR41_H3.C7b_01573
group_316		ATP-binding protein	41	41	1	104	186	104	222		788	788	788																			SR27_H3.C1a_02051	SR28_H3.C1b_02052	SR29_H3.C1c_02053		SR30_H3.C1d_02227	SR31_H3.C2a_02056	SR32_H3.C2b_02181	SR33_H3.C3a_02003	SR34_H3.C3b_02049	SR35_H3.C3c_02217	SR36_H3.C4_02269	SR37_H3.C5_02053	SR38_H3.C6a_02048	SR39_H3.C6b_02027		SR40_H3.C7a_02051	SR41_H3.C7b_02030	SR42_H3.C8a_02106
group_317		hypothetical protein	41	41	1	104	172	104	206		542	776	730																			SR27_H3.C1a_02067	SR28_H3.C1b_02068	SR29_H3.C1c_02069		SR30_H3.C1d_02243	SR31_H3.C2a_02072	SR32_H3.C2b_02197	SR33_H3.C3a_02019	SR34_H3.C3b_02065	SR35_H3.C3c_02233	SR36_H3.C4_02253	SR37_H3.C5_02069	SR38_H3.C6a_02064	SR39_H3.C6b_02011		SR40_H3.C7a_02253	SR41_H3.C7b_02014	SR42_H3.C8a_02313
group_462		RusA family crossover junction endodeoxyribonuclease	41	41	1	104	189	104	171		425	425	425																			SR27_H3.C1a_02048	SR28_H3.C1b_02049	SR29_H3.C1c_02050		SR30_H3.C1d_02224	SR31_H3.C2a_02053	SR32_H3.C2b_02178	SR33_H3.C3a_02000	SR34_H3.C3b_02046	SR35_H3.C3c_02214	SR36_H3.C4_02272	SR37_H3.C5_02050	SR38_H3.C6a_02045	SR39_H3.C6b_02030		SR40_H3.C7a_02054	SR41_H3.C7b_02033	SR42_H3.C8a_02109
group_687		hypothetical protein	41	41	1	104	206	104	155		209	209	209																			SR27_H3.C1a_02009	SR28_H3.C1b_02010	SR29_H3.C1c_02011		SR30_H3.C1d_02301	SR31_H3.C2a_02014	SR32_H3.C2b_02051	SR33_H3.C3a_01962	SR34_H3.C3b_02007	SR35_H3.C3c_02087	SR36_H3.C4_02015	SR37_H3.C5_02011	SR38_H3.C6a_02006	SR39_H3.C6b_02069		SR40_H3.C7a_02093	SR41_H3.C7b_02072	SR42_H3.C8a_02148
group_688		hypothetical protein	41	41	1	104	207	104	156		116	116	116																			SR27_H3.C1a_02010	SR28_H3.C1b_02011	SR29_H3.C1c_02012		SR30_H3.C1d_02300	SR31_H3.C2a_02015	SR32_H3.C2b_02052	SR33_H3.C3a_01963	SR34_H3.C3b_02008	SR35_H3.C3c_02088	SR36_H3.C4_02016	SR37_H3.C5_02012	SR38_H3.C6a_02007	SR39_H3.C6b_02068		SR40_H3.C7a_02092	SR41_H3.C7b_02071	SR42_H3.C8a_02147
group_715		hypothetical protein	41	41	1	104	178	104	214		170	170	170																			SR27_H3.C1a_02061	SR28_H3.C1b_02062	SR29_H3.C1c_02063		SR30_H3.C1d_02237	SR31_H3.C2a_02066	SR32_H3.C2b_02191	SR33_H3.C3a_02013	SR34_H3.C3b_02059	SR35_H3.C3c_02227	SR36_H3.C4_02259	SR37_H3.C5_02063	SR38_H3.C6a_02058	SR39_H3.C6b_02017		SR40_H3.C7a_02041	SR41_H3.C7b_02020	SR42_H3.C8a_02096
group_716		hypothetical protein	41	41	1	104	177	104	211		275	275	275																			SR27_H3.C1a_02062	SR28_H3.C1b_02063	SR29_H3.C1c_02064		SR30_H3.C1d_02238	SR31_H3.C2a_02067	SR32_H3.C2b_02192	SR33_H3.C3a_02014	SR34_H3.C3b_02060	SR35_H3.C3c_02228	SR36_H3.C4_02258	SR37_H3.C5_02064	SR38_H3.C6a_02059	SR39_H3.C6b_02016		SR40_H3.C7a_02040	SR41_H3.C7b_02019	SR42_H3.C8a_02095
group_719		hypothetical protein	41	41	1	104	175	104	209		716	716	716																			SR27_H3.C1a_02064	SR28_H3.C1b_02065	SR29_H3.C1c_02066		SR30_H3.C1d_02240	SR31_H3.C2a_02069	SR32_H3.C2b_02194	SR33_H3.C3a_02016	SR34_H3.C3b_02062	SR35_H3.C3c_02230	SR36_H3.C4_02256	SR37_H3.C5_02066	SR38_H3.C6a_02061	SR39_H3.C6b_02014		SR40_H3.C7a_02256	SR41_H3.C7b_02017	SR42_H3.C8a_02310
group_720		hypothetical protein	41	41	1	104	174	104	208		167	167	167																			SR27_H3.C1a_02065	SR28_H3.C1b_02066	SR29_H3.C1c_02067		SR30_H3.C1d_02241	SR31_H3.C2a_02070	SR32_H3.C2b_02195	SR33_H3.C3a_02017	SR34_H3.C3b_02063	SR35_H3.C3c_02231	SR36_H3.C4_02255	SR37_H3.C5_02067	SR38_H3.C6a_02062	SR39_H3.C6b_02013		SR40_H3.C7a_02255	SR41_H3.C7b_02016	SR42_H3.C8a_02311
group_721		hypothetical protein	41	41	1	104	173	104	207		209	209	209																			SR27_H3.C1a_02066	SR28_H3.C1b_02067	SR29_H3.C1c_02068		SR30_H3.C1d_02242	SR31_H3.C2a_02071	SR32_H3.C2b_02196	SR33_H3.C3a_02018	SR34_H3.C3b_02064	SR35_H3.C3c_02232	SR36_H3.C4_02254	SR37_H3.C5_02068	SR38_H3.C6a_02063	SR39_H3.C6b_02012		SR40_H3.C7a_02254	SR41_H3.C7b_02015	SR42_H3.C8a_02312
group_722		hypothetical protein	41	41	1	104	171	104	205		554	554	554																			SR27_H3.C1a_02068	SR28_H3.C1b_02069	SR29_H3.C1c_02070		SR30_H3.C1d_02244	SR31_H3.C2a_02073	SR32_H3.C2b_02198	SR33_H3.C3a_02020	SR34_H3.C3b_02066	SR35_H3.C3c_02234	SR36_H3.C4_02252	SR37_H3.C5_02070	SR38_H3.C6a_02065	SR39_H3.C6b_02010		SR40_H3.C7a_02252	SR41_H3.C7b_02013	SR42_H3.C8a_02314
group_723		hypothetical protein	41	41	1	104	170	104	204		443	443	443																			SR27_H3.C1a_02069	SR28_H3.C1b_02070	SR29_H3.C1c_02071		SR30_H3.C1d_02245	SR31_H3.C2a_02074	SR32_H3.C2b_02199	SR33_H3.C3a_02021	SR34_H3.C3b_02067	SR35_H3.C3c_02235	SR36_H3.C4_02251	SR37_H3.C5_02071	SR38_H3.C6a_02066	SR39_H3.C6b_02009		SR40_H3.C7a_02251	SR41_H3.C7b_02012	SR42_H3.C8a_02315
xerD_1		site-specific integrase	41	41	1	104	166	104	200		239	1130	734																			SR27_H3.C1a_00420	SR28_H3.C1b_00420	SR29_H3.C1c_00422		SR30_H3.C1d_02304	SR31_H3.C2a_00001	SR32_H3.C2b_00001	SR33_H3.C3a_02253	SR34_H3.C3b_02300	SR35_H3.C3c_00420	SR36_H3.C4_00001	SR37_H3.C5_00420	SR38_H3.C6a_02305	SR39_H3.C6b_02262		SR40_H3.C7a_02285	SR41_H3.C7b_00421	SR42_H3.C8a_02341
group_724		hypothetical protein	40	40	1	104	169	104	203		212	212	212																			SR27_H3.C1a_02070	SR28_H3.C1b_02071	SR29_H3.C1c_02072		SR30_H3.C1d_02246	SR31_H3.C2a_02075	SR32_H3.C2b_02200	SR33_H3.C3a_02022	SR34_H3.C3b_02068	SR35_H3.C3c_02236	SR36_H3.C4_02250	SR37_H3.C5_02072	SR38_H3.C6a_02067	SR39_H3.C6b_02008		SR40_H3.C7a_02250	SR41_H3.C7b_02011	SR42_H3.C8a_02316
group_725		helix-turn-helix domain-containing protein	40	40	1	104	168	104	202		731	731	731																			SR27_H3.C1a_02071	SR28_H3.C1b_02072	SR29_H3.C1c_02073		SR30_H3.C1d_02247	SR31_H3.C2a_02076	SR32_H3.C2b_02201	SR33_H3.C3a_02023	SR34_H3.C3b_02069	SR35_H3.C3c_02237	SR36_H3.C4_02249	SR37_H3.C5_02073	SR38_H3.C6a_02068	SR39_H3.C6b_02007		SR40_H3.C7a_02249	SR41_H3.C7b_02010	SR42_H3.C8a_02317
group_111		hypothetical protein	39	39	1	104	180	104	217		1949	1949	1949																			SR27_H3.C1a_02059	SR28_H3.C1b_02060	SR29_H3.C1c_02061		SR30_H3.C1d_02235	SR31_H3.C2a_02064	SR32_H3.C2b_02189	SR33_H3.C3a_02011	SR34_H3.C3b_02057	SR35_H3.C3c_02225	SR36_H3.C4_02261	SR37_H3.C5_02061	SR38_H3.C6a_02056	SR39_H3.C6b_02019		SR40_H3.C7a_02043	SR41_H3.C7b_02022	SR42_H3.C8a_02098
group_706		hypothetical protein	38	38	1	104	190	104	170		206	206	206																			SR27_H3.C1a_02047	SR28_H3.C1b_02048	SR29_H3.C1c_02049		SR30_H3.C1d_02223	SR31_H3.C2a_02052	SR32_H3.C2b_02177	SR33_H3.C3a_01999	SR34_H3.C3b_02045	SR35_H3.C3c_02213	SR36_H3.C4_02273	SR37_H3.C5_02049	SR38_H3.C6a_02044	SR39_H3.C6b_02031		SR40_H3.C7a_02055	SR41_H3.C7b_02034	SR42_H3.C8a_02110
group_717		hypothetical protein	38	38	1	104	176	104	210		470	470	470																			SR27_H3.C1a_02063	SR28_H3.C1b_02064	SR29_H3.C1c_02065		SR30_H3.C1d_02239	SR31_H3.C2a_02068	SR32_H3.C2b_02193	SR33_H3.C3a_02015	SR34_H3.C3b_02061	SR35_H3.C3c_02229	SR36_H3.C4_02257	SR37_H3.C5_02065	SR38_H3.C6a_02060	SR39_H3.C6b_02015			SR41_H3.C7b_02018
group_932		siphovirus Gp157 family protein	37	37	1	104	79	104	66		482	482	482																		SR26_H2.C1_00703							SR32_H3.C2b_02225	SR33_H3.C3a_02227			SR36_H3.C4_02062					SR40_H3.C7a_02286		SR42_H3.C8a_02342
group_697		HK97 gp10 family phage protein	36	36	1	104	210	104	161		413	413	413																			SR27_H3.C1a_02029	SR28_H3.C1b_02030	SR29_H3.C1c_02031		SR30_H3.C1d_02118	SR31_H3.C2a_02034	SR32_H3.C2b_02071	SR33_H3.C3a_01981	SR34_H3.C3b_02027	SR35_H3.C3c_02107	SR36_H3.C4_02035	SR37_H3.C5_02031	SR38_H3.C6a_02026	SR39_H3.C6b_02049		SR40_H3.C7a_02073	SR41_H3.C7b_02052	SR42_H3.C8a_02128
group_254		terminase large subunit	34	34	1	104	47	104	108		821	1703	1677																		SR26_H2.C1_00677	SR27_H3.C1a_01516	SR28_H3.C1b_01517	SR29_H3.C1c_01561	SR2_H1.C1b_01038	SR30_H3.C1d_01515	SR31_H3.C2a_01519			SR34_H3.C3b_01515	SR35_H3.C3c_01516		SR37_H3.C5_01518	SR38_H3.C6a_01514	SR39_H3.C6b_01395		SR40_H3.C7a_01278	SR41_H3.C7b_01559	SR42_H3.C8a_01278
group_257		YopX family protein	34	34	1	104	222	104	137		341	407	393	SR10_H1.C6a_01918		SR12_H1.C7a_01915	SR13_H1.C7b_00939	SR14_H1.C7c_01921	SR15_H1.C8_00937	SR16_H1.C9a_01054	SR17_H1.C9b_01025	SR18_H1.C10_01052	SR19_H1.C11_01051		SR20_H1.C12_01920	SR21_H1.C13_01026	SR22_H1.C14_00938	SR23_H1.C15a_01920	SR24_H1.C15b_00939	SR25_H1.C16_01052					SR2_H1.C1b_01051											SR3_H1.C2_00939
group_726		type II toxin-antitoxin system PemK/MazF family toxin	34	34	1	104	167	104	201		716	716	716																			SR27_H3.C1a_02072	SR28_H3.C1b_02073	SR29_H3.C1c_02074		SR30_H3.C1d_02248	SR31_H3.C2a_02077	SR32_H3.C2b_02202	SR33_H3.C3a_02024	SR34_H3.C3b_02070	SR35_H3.C3c_02238		SR37_H3.C5_02074	SR38_H3.C6a_02069	SR39_H3.C6b_02006			SR41_H3.C7b_02009
bioB_1		biotin synthase BioB	33	33	1	104	157	104	181		425	989	561																			SR27_H3.C1a_00018	SR28_H3.C1b_00018	SR29_H3.C1c_00018		SR30_H3.C1d_00402	SR31_H3.C2a_00404	SR32_H3.C2b_00403	SR33_H3.C3a_00018	SR34_H3.C3b_00018	SR35_H3.C3c_00018	SR36_H3.C4_00404	SR37_H3.C5_00018	SR38_H3.C6a_00018	SR39_H3.C6b_00018		SR40_H3.C7a_01506	SR41_H3.C7b_00018	SR42_H3.C8a_01427
group_270		MetQ/NlpA family ABC transporter substrate-binding protein	33	33	1	104	158	104	182		98	818	643																			SR27_H3.C1a_00021	SR28_H3.C1b_00021	SR29_H3.C1c_00021		SR30_H3.C1d_00399	SR31_H3.C2a_00401	SR32_H3.C2b_00400	SR33_H3.C3a_00021	SR34_H3.C3b_00021	SR35_H3.C3c_00021	SR36_H3.C4_00401	SR37_H3.C5_00021	SR38_H3.C6a_00021	SR39_H3.C6b_00021		SR40_H3.C7a_01503	SR41_H3.C7b_00021	SR42_H3.C8a_01430
group_659		hypothetical protein	33	33	1	104	43	104	102		158	158	158																		SR26_H2.C1_00672	SR27_H3.C1a_01511	SR28_H3.C1b_01512	SR29_H3.C1c_01556		SR30_H3.C1d_01510	SR31_H3.C2a_01514			SR34_H3.C3b_01510	SR35_H3.C3c_01511		SR37_H3.C5_01513	SR38_H3.C6a_01509	SR39_H3.C6b_01400		SR40_H3.C7a_01283	SR41_H3.C7b_01554	SR42_H3.C8a_01283
group_663		hypothetical protein	33	33	1	104	131	104	43		203	203	203																		SR26_H2.C1_00697	SR27_H3.C1a_02277	SR28_H3.C1b_02278	SR29_H3.C1c_02277		SR30_H3.C1d_02273	SR31_H3.C2a_02276			SR34_H3.C3b_02275	SR35_H3.C3c_02267		SR37_H3.C5_02279	SR38_H3.C6a_02274	SR39_H3.C6b_02275		SR40_H3.C7a_02244	SR41_H3.C7b_02277	SR42_H3.C8a_02308
group_665		hypothetical protein	33	33	1	104	129	104	45		503	503	503																		SR26_H2.C1_00699	SR27_H3.C1a_02279	SR28_H3.C1b_02280	SR29_H3.C1c_02275		SR30_H3.C1d_02275	SR31_H3.C2a_02278			SR34_H3.C3b_02277	SR35_H3.C3c_02265		SR37_H3.C5_02281	SR38_H3.C6a_02276	SR39_H3.C6b_02277		SR40_H3.C7a_02246	SR41_H3.C7b_02279	SR42_H3.C8a_02306
group_667		hypothetical protein	33	33	1	104	127	104	47		107	107	107																		SR26_H2.C1_00701	SR27_H3.C1a_02281	SR28_H3.C1b_02282	SR29_H3.C1c_02273		SR30_H3.C1d_02277	SR31_H3.C2a_02280			SR34_H3.C3b_02279	SR35_H3.C3c_02263		SR37_H3.C5_02283	SR38_H3.C6a_02278	SR39_H3.C6b_02279		SR40_H3.C7a_02248	SR41_H3.C7b_02281	SR42_H3.C8a_02304
group_451		hypothetical protein	32	32	1	99	2	99	2		1154	1352	1302																			SR27_H3.C1a_00850	SR28_H3.C1b_00737	SR29_H3.C1c_01077		SR30_H3.C1d_00736	SR31_H3.C2a_00851	SR32_H3.C2b_01154	SR33_H3.C3a_01045	SR34_H3.C3b_00849	SR35_H3.C3c_00850	SR36_H3.C4_01271	SR37_H3.C5_00738	SR38_H3.C6a_00849	SR39_H3.C6b_00849		SR40_H3.C7a_00621	SR41_H3.C7b_00962	SR42_H3.C8a_00621
group_658		hypothetical protein	32	32	1	104	26	104	80		269	269	269																		SR26_H2.C1_00657	SR27_H3.C1a_01496	SR28_H3.C1b_01497	SR29_H3.C1c_01541		SR30_H3.C1d_01495	SR31_H3.C2a_01499			SR34_H3.C3b_01495	SR35_H3.C3c_01496		SR37_H3.C5_01498	SR38_H3.C6a_01494	SR39_H3.C6b_01415		SR40_H3.C7a_01298	SR41_H3.C7b_01539	SR42_H3.C8a_01298
group_662		VRR-NUC domain-containing protein	32	32	1	104	132	104	42		308	308	308																		SR26_H2.C1_00696	SR27_H3.C1a_02276	SR28_H3.C1b_02277	SR29_H3.C1c_02278		SR30_H3.C1d_02272	SR31_H3.C2a_02275			SR34_H3.C3b_02274	SR35_H3.C3c_02268		SR37_H3.C5_02278	SR38_H3.C6a_02273	SR39_H3.C6b_02274		SR40_H3.C7a_02243	SR41_H3.C7b_02276	SR42_H3.C8a_02309
group_664		hypothetical protein	32	32	1	104	130	104	44		2306	2306	2306																		SR26_H2.C1_00698	SR27_H3.C1a_02278	SR28_H3.C1b_02279	SR29_H3.C1c_02276		SR30_H3.C1d_02274	SR31_H3.C2a_02277			SR34_H3.C3b_02276	SR35_H3.C3c_02266		SR37_H3.C5_02280	SR38_H3.C6a_02275	SR39_H3.C6b_02276		SR40_H3.C7a_02245	SR41_H3.C7b_02278	SR42_H3.C8a_02307
radD_1		Putative DNA repair helicase RadD	32	32	1	104	128	104	46		1220	1220	1220																		SR26_H2.C1_00700	SR27_H3.C1a_02280	SR28_H3.C1b_02281	SR29_H3.C1c_02274		SR30_H3.C1d_02276	SR31_H3.C2a_02279			SR34_H3.C3b_02278	SR35_H3.C3c_02264		SR37_H3.C5_02282	SR38_H3.C6a_02277	SR39_H3.C6b_02278		SR40_H3.C7a_02247	SR41_H3.C7b_02280	SR42_H3.C8a_02305
group_669		hypothetical protein	31	31	1	104	111	104	27		116	116	116																		SR26_H2.C1_00707	SR27_H3.C1a_01624	SR28_H3.C1b_01625	SR29_H3.C1c_01577		SR30_H3.C1d_01623	SR31_H3.C2a_01628			SR34_H3.C3b_01531	SR35_H3.C3c_01624		SR37_H3.C5_01534	SR38_H3.C6a_01622	SR39_H3.C6b_01621		SR40_H3.C7a_01525	SR41_H3.C7b_01575	SR42_H3.C8a_01525
group_732		hypothetical protein	31	31	1	104	66	104	53		143	143	143																			SR27_H3.C1a_02289	SR28_H3.C1b_02290	SR29_H3.C1c_02292		SR30_H3.C1d_02285	SR31_H3.C2a_02288		SR33_H3.C3a_02239	SR34_H3.C3b_02287	SR35_H3.C3c_02275			SR38_H3.C6a_02286	SR39_H3.C6b_02287		SR40_H3.C7a_02265	SR41_H3.C7b_02289	SR42_H3.C8a_02324
group_714		hypothetical protein	30	30	1	104	181	104	218		206	206	206																			SR27_H3.C1a_02058	SR28_H3.C1b_02059	SR29_H3.C1c_02060		SR30_H3.C1d_02234	SR31_H3.C2a_02063	SR32_H3.C2b_02188	SR33_H3.C3a_02010	SR34_H3.C3b_02056	SR35_H3.C3c_02224	SR36_H3.C4_02262	SR37_H3.C5_02060	SR38_H3.C6a_02055	SR39_H3.C6b_02020		SR40_H3.C7a_02044	SR41_H3.C7b_02023	SR42_H3.C8a_02099
group_463		hypothetical protein	29	29	1	104	184	104	220		578	590	578																			SR27_H3.C1a_02056	SR28_H3.C1b_02057	SR29_H3.C1c_02058		SR30_H3.C1d_02232	SR31_H3.C2a_02061	SR32_H3.C2b_02186	SR33_H3.C3a_02008	SR34_H3.C3b_02054	SR35_H3.C3c_02222	SR36_H3.C4_02264	SR37_H3.C5_02058	SR38_H3.C6a_02053	SR39_H3.C6b_02022		SR40_H3.C7a_02046	SR41_H3.C7b_02025	SR42_H3.C8a_02101
ssb_2		single-stranded DNA-binding protein	29	29	1	104	185	104	221		440	440	440																			SR27_H3.C1a_02055	SR28_H3.C1b_02056	SR29_H3.C1c_02057		SR30_H3.C1d_02231	SR31_H3.C2a_02060	SR32_H3.C2b_02185	SR33_H3.C3a_02007	SR34_H3.C3b_02053	SR35_H3.C3c_02221	SR36_H3.C4_02265	SR37_H3.C5_02057	SR38_H3.C6a_02052	SR39_H3.C6b_02023		SR40_H3.C7a_02047	SR41_H3.C7b_02026	SR42_H3.C8a_02102
group_115		hypothetical protein	28	28	1	104	179	104	215		278	2219	416																			SR27_H3.C1a_02060	SR28_H3.C1b_02061	SR29_H3.C1c_02062		SR30_H3.C1d_02236	SR31_H3.C2a_02065	SR32_H3.C2b_02190	SR33_H3.C3a_02012	SR34_H3.C3b_02058	SR35_H3.C3c_02226	SR36_H3.C4_02260	SR37_H3.C5_02062	SR38_H3.C6a_02057	SR39_H3.C6b_02018			SR41_H3.C7b_02021
group_450		hypothetical protein	28	28	1	104	205	104	145		407	428	425																			SR27_H3.C1a_00622	SR28_H3.C1b_00622	SR29_H3.C1c_00497		SR30_H3.C1d_00621	SR31_H3.C2a_00623	SR32_H3.C2b_00495	SR33_H3.C3a_00623	SR34_H3.C3b_00494	SR35_H3.C3c_00495	SR36_H3.C4_00624	SR37_H3.C5_00495	SR38_H3.C6a_00621	SR39_H3.C6b_00494		SR40_H3.C7a_00506	SR41_H3.C7b_00623	SR42_H3.C8a_00379
group_713		hypothetical protein	28	28	1	104	182	104	219		716	716	716																			SR27_H3.C1a_02057	SR28_H3.C1b_02058	SR29_H3.C1c_02059		SR30_H3.C1d_02233	SR31_H3.C2a_02062	SR32_H3.C2b_02187	SR33_H3.C3a_02009	SR34_H3.C3b_02055	SR35_H3.C3c_02223	SR36_H3.C4_02263	SR37_H3.C5_02059	SR38_H3.C6a_02054	SR39_H3.C6b_02021		SR40_H3.C7a_02045	SR41_H3.C7b_02024	SR42_H3.C8a_02100
group_132		aquaporin family protein	27	27	1	97	2	97	2	Investigate	257	257	257																			SR27_H3.C1a_01966	SR28_H3.C1b_01902	SR29_H3.C1c_01945		SR30_H3.C1d_01900	SR31_H3.C2a_01971	SR32_H3.C2b_01893	SR33_H3.C3a_01854	SR34_H3.C3b_01964	SR35_H3.C3c_01901	SR36_H3.C4_01900	SR37_H3.C5_01903	SR38_H3.C6a_01963	SR39_H3.C6b_01898		SR40_H3.C7a_01893	SR41_H3.C7b_01943	SR42_H3.C8a_01895
group_26		hypothetical protein	27	27	1	104	20	104	81		548	2036	1925	SR10_H1.C6a_01555	SR11_H1.C6b_01176	SR12_H1.C7a_01556	SR13_H1.C7b_00797	SR14_H1.C7c_01661	SR15_H1.C8_00796	SR16_H1.C9a_00912	SR17_H1.C9b_01167	SR18_H1.C10_00910	SR19_H1.C11_00909	SR1_H1.C1a_00989	SR20_H1.C12_01556	SR21_H1.C13_01168	SR22_H1.C14_00797	SR23_H1.C15a_01599	SR24_H1.C15b_00797	SR25_H1.C16_00910					SR2_H1.C1b_00908											SR3_H1.C2_00797
group_38		PTS glucitol transporter subunit IIA	27	27	1	99	4	99	4		614	1256	661																			SR27_H3.C1a_00754	SR28_H3.C1b_00833	SR29_H3.C1c_00981		SR30_H3.C1d_00832	SR31_H3.C2a_00755	SR32_H3.C2b_01250	SR33_H3.C3a_00949	SR34_H3.C3b_00753	SR35_H3.C3c_00754	SR36_H3.C4_01175	SR37_H3.C5_00834	SR38_H3.C6a_00753	SR39_H3.C6b_00753		SR40_H3.C7a_00717	SR41_H3.C7b_01058	SR42_H3.C8a_00717
group_660		hypothetical protein	27	27	1	104	17	104	115		146	146	146																		SR26_H2.C1_00683	SR27_H3.C1a_01522	SR28_H3.C1b_01523	SR29_H3.C1c_01567		SR30_H3.C1d_01521	SR31_H3.C2a_01525			SR34_H3.C3b_01521	SR35_H3.C3c_01522		SR37_H3.C5_01524	SR38_H3.C6a_01520	SR39_H3.C6b_01389		SR40_H3.C7a_01272	SR41_H3.C7b_01565	SR42_H3.C8a_01272
group_707		hypothetical protein	27	27	1	104	188	104	224		206	206	206																			SR27_H3.C1a_02049	SR28_H3.C1b_02050	SR29_H3.C1c_02051		SR30_H3.C1d_02225	SR31_H3.C2a_02054	SR32_H3.C2b_02179	SR33_H3.C3a_02001	SR34_H3.C3b_02047	SR35_H3.C3c_02215	SR36_H3.C4_02271	SR37_H3.C5_02051	SR38_H3.C6a_02046	SR39_H3.C6b_02029		SR40_H3.C7a_02053	SR41_H3.C7b_02032	SR42_H3.C8a_02108
group_708		hypothetical protein	27	27	1	104	187	104	223		170	170	170																			SR27_H3.C1a_02050	SR28_H3.C1b_02051	SR29_H3.C1c_02052		SR30_H3.C1d_02226	SR31_H3.C2a_02055	SR32_H3.C2b_02180	SR33_H3.C3a_02002	SR34_H3.C3b_02048	SR35_H3.C3c_02216	SR36_H3.C4_02270	SR37_H3.C5_02052	SR38_H3.C6a_02047	SR39_H3.C6b_02028		SR40_H3.C7a_02052	SR41_H3.C7b_02031	SR42_H3.C8a_02107
group_783		hypothetical protein	27	27	1	104	76	104	63		224	224	224
group_203		beta-glucoside-specific PTS transporter subunit IIABC	26	26	1	103	27	103	4		926	1895	1857	SR10_H1.C6a_01164	SR11_H1.C6b_01279	SR12_H1.C7a_01200	SR13_H1.C7b_01351	SR14_H1.C7c_01053	SR15_H1.C8_01313	SR16_H1.C9a_01279	SR17_H1.C9b_01428	SR18_H1.C10_01463	SR19_H1.C11_01463	SR1_H1.C1a_01281	SR20_H1.C12_01087	SR21_H1.C13_01464	SR22_H1.C14_01314	SR23_H1.C15a_00901	SR24_H1.C15b_01315	SR25_H1.C16_01427	SR26_H2.C1_01454				SR2_H1.C1b_01462											SR3_H1.C2_01349
group_258		hypothetical protein	26	26	1	104	123	104	39		260	1238	1164	SR10_H1.C6a_01926		SR12_H1.C7a_01907	SR13_H1.C7b_00947	SR14_H1.C7c_01929	SR15_H1.C8_00945	SR16_H1.C9a_01062	SR17_H1.C9b_01017	SR18_H1.C10_01060	SR19_H1.C11_01059		SR20_H1.C12_01928	SR21_H1.C13_01018	SR22_H1.C14_00946	SR23_H1.C15a_01928	SR24_H1.C15b_00947	SR25_H1.C16_01060					SR2_H1.C1b_01059										SR39_H3.C6b_02304	SR3_H1.C2_00947
group_272		L-cystine transporter	26	26	1	104	159	104	190		416	1391	453																		SR26_H2.C1_01238	SR27_H3.C1a_00027	SR28_H3.C1b_00027	SR29_H3.C1c_00027		SR30_H3.C1d_00393	SR31_H3.C2a_00395	SR32_H3.C2b_00394	SR33_H3.C3a_00027	SR34_H3.C3b_00027	SR35_H3.C3c_00027	SR36_H3.C4_00395	SR37_H3.C5_00027	SR38_H3.C6a_00027	SR39_H3.C6b_00027		SR40_H3.C7a_01497	SR41_H3.C7b_00027	SR42_H3.C8a_01436
group_274		hypothetical protein	26	26	1	104	162	104	193		239	674	657																		SR26_H2.C1_01233	SR27_H3.C1a_00032	SR28_H3.C1b_00032	SR29_H3.C1c_00032		SR30_H3.C1d_00388	SR31_H3.C2a_00390	SR32_H3.C2b_00389	SR33_H3.C3a_00032	SR34_H3.C3b_00032	SR35_H3.C3c_00032	SR36_H3.C4_00390	SR37_H3.C5_00032	SR38_H3.C6a_00032	SR39_H3.C6b_00032		SR40_H3.C7a_01492	SR41_H3.C7b_00032	SR42_H3.C8a_01441
group_76		helix-turn-helix domain-containing protein	26	26	1	103	28	103	5		1169	2039	1246	SR10_H1.C6a_01169	SR11_H1.C6b_01274	SR12_H1.C7a_01195	SR13_H1.C7b_01346	SR14_H1.C7c_01058	SR15_H1.C8_01318	SR16_H1.C9a_01284	SR17_H1.C9b_01433	SR18_H1.C10_01458	SR19_H1.C11_01458	SR1_H1.C1a_01276	SR20_H1.C12_01082	SR21_H1.C13_01459	SR22_H1.C14_01319	SR23_H1.C15a_00906	SR24_H1.C15b_01320	SR25_H1.C16_01432	SR26_H2.C1_01459				SR2_H1.C1b_01457											SR3_H1.C2_01344
arsB_1		arsenite efflux transporter membrane subunit ArsB	25	25	1	104	165	104	198		464	464	464																			SR27_H3.C1a_00419	SR28_H3.C1b_00419	SR29_H3.C1c_00421		SR30_H3.C1d_00001	SR31_H3.C2a_00002	SR32_H3.C2b_00002	SR33_H3.C3a_00421	SR34_H3.C3b_00419	SR35_H3.C3c_00419	SR36_H3.C4_00002	SR37_H3.C5_00419	SR38_H3.C6a_00419	SR39_H3.C6b_00419		SR40_H3.C7a_00001	SR41_H3.C7b_00420	SR42_H3.C8a_00304
dprA_2		DNA-processing protein DprA	25	25	1	97	1	97	1	Investigate	221	221	221																			SR27_H3.C1a_01912	SR28_H3.C1b_01956	SR29_H3.C1c_01999		SR30_H3.C1d_01954	SR31_H3.C2a_01917	SR32_H3.C2b_01947	SR33_H3.C3a_01908	SR34_H3.C3b_01910	SR35_H3.C3c_01955	SR36_H3.C4_01954	SR37_H3.C5_01957	SR38_H3.C6a_01909	SR39_H3.C6b_01952		SR40_H3.C7a_01947	SR41_H3.C7b_01997	SR42_H3.C8a_01949
group_145		RDD family protein	25	25	1	104	200	104	153		266	266	266	SR10_H1.C6a_00426	SR11_H1.C6b_00426	SR12_H1.C7a_00103	SR13_H1.C7b_00103	SR14_H1.C7c_00426	SR15_H1.C8_00426	SR16_H1.C9a_00427	SR17_H1.C9b_00426	SR18_H1.C10_00426	SR19_H1.C11_00103	SR1_H1.C1a_00426	SR20_H1.C12_00426	SR21_H1.C13_00103	SR22_H1.C14_00103	SR23_H1.C15a_00426	SR24_H1.C15b_00103	SR25_H1.C16_00426					SR2_H1.C1b_00426											SR3_H1.C2_00103
group_192		Fic family protein	25	25	1	103	24	103	1		581	581	581	SR10_H1.C6a_01112	SR11_H1.C6b_01331	SR12_H1.C7a_01252	SR13_H1.C7b_01403	SR14_H1.C7c_01001	SR15_H1.C8_01261	SR16_H1.C9a_01227	SR17_H1.C9b_01376	SR18_H1.C10_01515	SR19_H1.C11_01515	SR1_H1.C1a_01333	SR20_H1.C12_01139	SR21_H1.C13_01516	SR22_H1.C14_01262	SR23_H1.C15a_00849	SR24_H1.C15b_01263	SR25_H1.C16_01375					SR2_H1.C1b_01514											SR3_H1.C2_01401
group_20		hypothetical protein	25	25	1	95	2	94	2	Investigate	1211	2723	1953	SR10_H1.C6a_02120	SR11_H1.C6b_02057			SR14_H1.C7c_02116	SR15_H1.C8_02119	SR16_H1.C9a_02092			SR19_H1.C11_02112		SR20_H1.C12_02129		SR22_H1.C14_02122	SR23_H1.C15a_02123	SR24_H1.C15b_02165			SR27_H3.C1a_02182			SR2_H1.C1b_02090		SR31_H3.C2a_02181				SR35_H3.C3c_02141		SR37_H3.C5_02184	SR38_H3.C6a_02179	SR39_H3.C6b_02179	SR3_H1.C2_02095			SR42_H3.C8a_02210
group_205		AAA family ATPase	25	25	1	93	1	96	1	Investigate	644	644	644																			SR27_H3.C1a_01863	SR28_H3.C1b_01842	SR29_H3.C1c_01907		SR30_H3.C1d_01840	SR31_H3.C2a_01846	SR32_H3.C2b_01834	SR33_H3.C3a_01795	SR34_H3.C3b_01840	SR35_H3.C3c_01841	SR36_H3.C4_01840	SR37_H3.C5_01844	SR38_H3.C6a_01860	SR39_H3.C6b_01838		SR40_H3.C7a_01834	SR41_H3.C7b_01884	SR42_H3.C8a_01857
group_222		M15 family metallopeptidase	25	25	1	96	1	93	1	Investigate	176	176	176	SR10_H1.C6a_01496	SR11_H1.C6b_01553	SR12_H1.C7a_01476	SR13_H1.C7b_01627	SR14_H1.C7c_01364	SR15_H1.C8_01624	SR16_H1.C9a_01804	SR17_H1.C9b_01738	SR18_H1.C10_01760	SR19_H1.C11_01759	SR1_H1.C1a_01577	SR20_H1.C12_01362	SR21_H1.C13_01761	SR22_H1.C14_01625	SR23_H1.C15a_01405	SR24_H1.C15b_01645	SR25_H1.C16_01759					SR2_H1.C1b_01759											SR3_H1.C2_01624
group_244		tetratricopeptide repeat protein	25	25	1	104	96	104	10		377	377	377	SR10_H1.C6a_01829	SR11_H1.C6b_01061	SR12_H1.C7a_01830	SR13_H1.C7b_00982	SR14_H1.C7c_01832	SR15_H1.C8_00979	SR16_H1.C9a_01097	SR17_H1.C9b_00983	SR18_H1.C10_01094	SR19_H1.C11_01094	SR1_H1.C1a_01105	SR20_H1.C12_01831	SR21_H1.C13_00983	SR22_H1.C14_00980	SR23_H1.C15a_01874	SR24_H1.C15b_00981	SR25_H1.C16_01094					SR2_H1.C1b_01093											SR3_H1.C2_00982
ssb_1		single-stranded DNA-binding protein	25	25	1						260	398	392	SR10_H1.C6a_01933		SR12_H1.C7a_01900	SR13_H1.C7b_00954	SR14_H1.C7c_01936	SR15_H1.C8_00952	SR16_H1.C9a_01069	SR17_H1.C9b_01010	SR18_H1.C10_01066	SR19_H1.C11_01066		SR20_H1.C12_01935	SR21_H1.C13_01011	SR22_H1.C14_00953	SR23_H1.C15a_01935	SR24_H1.C15b_00954	SR25_H1.C16_01067					SR2_H1.C1b_01065										SR39_H3.C6b_02302	SR3_H1.C2_00954
group_415		hypothetical protein	25	25	1	104	115	104	31		269	623	608	SR10_H1.C6a_01934		SR12_H1.C7a_01899	SR13_H1.C7b_00955	SR14_H1.C7c_01937	SR15_H1.C8_00953	SR16_H1.C9a_01070	SR17_H1.C9b_01009	SR18_H1.C10_01067	SR19_H1.C11_01067		SR20_H1.C12_01936	SR21_H1.C13_01010	SR22_H1.C14_00954	SR23_H1.C15a_01936	SR24_H1.C15b_00955	SR25_H1.C16_01068					SR2_H1.C1b_01066											SR3_H1.C2_00955
group_557		hypothetical protein	25	25	1	104	19	104	101		158	158	158	SR10_H1.C6a_01900		SR12_H1.C7a_01933	SR13_H1.C7b_00921	SR14_H1.C7c_01903	SR15_H1.C8_00920	SR16_H1.C9a_01036	SR17_H1.C9b_01043	SR18_H1.C10_01034	SR19_H1.C11_01033		SR20_H1.C12_01902	SR21_H1.C13_01044	SR22_H1.C14_00921	SR23_H1.C15a_01903	SR24_H1.C15b_00921	SR25_H1.C16_01034					SR2_H1.C1b_01032											SR3_H1.C2_00921
group_685		NtaA/DmoA family FMN-dependent monooxygenase	25	25	1	99	6	99	6		1235	1235	1235																			SR27_H3.C1a_00797	SR28_H3.C1b_00790	SR29_H3.C1c_01024		SR30_H3.C1d_00789	SR31_H3.C2a_00798	SR32_H3.C2b_01207	SR33_H3.C3a_00992	SR34_H3.C3b_00796	SR35_H3.C3c_00797	SR36_H3.C4_01218	SR37_H3.C5_00791	SR38_H3.C6a_00796	SR39_H3.C6b_00796		SR40_H3.C7a_00674	SR41_H3.C7b_01015	SR42_H3.C8a_00674
group_72		2-dehydropantoate 2-reductase	25	25	1	104	149	104	195		485	485	485	SR10_H1.C6a_00541	SR11_H1.C6b_01732	SR12_H1.C7a_00895	SR13_H1.C7b_01806	SR14_H1.C7c_01454	SR15_H1.C8_01803	SR16_H1.C9a_00897	SR17_H1.C9b_00541	SR18_H1.C10_00895	SR19_H1.C11_00894	SR1_H1.C1a_01646	SR20_H1.C12_01541	SR21_H1.C13_00895	SR22_H1.C14_01804	SR23_H1.C15a_01584	SR24_H1.C15b_01804	SR25_H1.C16_00895					SR2_H1.C1b_00541											SR3_H1.C2_01714
group_782		site-specific integrase	25	25	1	104	64	104	51		1049	1049	1049
thiC_1		phosphomethylpyrimidine synthase ThiC	25	25	1	94	1	95	1	Investigate	707	707	707																			SR27_H3.C1a_00968	SR28_H3.C1b_00991	SR29_H3.C1c_01218		SR30_H3.C1d_00990	SR31_H3.C2a_00969	SR32_H3.C2b_01385	SR33_H3.C3a_01186	SR34_H3.C3b_00967	SR35_H3.C3c_00991	SR36_H3.C4_01412	SR37_H3.C5_00969	SR38_H3.C6a_00967	SR39_H3.C6b_00990		SR40_H3.C7a_00852	SR41_H3.C7b_01193	SR42_H3.C8a_00875
group_201		hypothetical protein	24	24	1	103	25	103	2		263	263	263	SR10_H1.C6a_01155	SR11_H1.C6b_01288	SR12_H1.C7a_01209	SR13_H1.C7b_01360	SR14_H1.C7c_01044	SR15_H1.C8_01304	SR16_H1.C9a_01270	SR17_H1.C9b_01419	SR18_H1.C10_01472	SR19_H1.C11_01472	SR1_H1.C1a_01290	SR20_H1.C12_01096	SR21_H1.C13_01473	SR22_H1.C14_01305	SR23_H1.C15a_00892	SR24_H1.C15b_01306	SR25_H1.C16_01418					SR2_H1.C1b_01471											SR3_H1.C2_01358
group_410		hypothetical protein	24	24	1	104	124	104	40		206	206	206	SR10_H1.C6a_01925		SR12_H1.C7a_01908	SR13_H1.C7b_00946	SR14_H1.C7c_01928	SR15_H1.C8_00944	SR16_H1.C9a_01061	SR17_H1.C9b_01018	SR18_H1.C10_01059	SR19_H1.C11_01058		SR20_H1.C12_01927	SR21_H1.C13_01019	SR22_H1.C14_00945	SR23_H1.C15a_01927	SR24_H1.C15b_00946	SR25_H1.C16_01059					SR2_H1.C1b_01058											SR3_H1.C2_00946
group_411		hypothetical protein	24	24	1	104	121	104	37		728	743	742	SR10_H1.C6a_01928		SR12_H1.C7a_01905	SR13_H1.C7b_00949	SR14_H1.C7c_01931	SR15_H1.C8_00947	SR16_H1.C9a_01064	SR17_H1.C9b_01015	SR18_H1.C10_01062	SR19_H1.C11_01061		SR20_H1.C12_01930	SR21_H1.C13_01016	SR22_H1.C14_00948	SR23_H1.C15a_01930	SR24_H1.C15b_00949	SR25_H1.C16_01062					SR2_H1.C1b_01061											SR3_H1.C2_00949
group_412		hypothetical protein	24	24	1	104	119	104	35		119	119	119	SR10_H1.C6a_01930		SR12_H1.C7a_01903	SR13_H1.C7b_00951	SR14_H1.C7c_01933	SR15_H1.C8_00949	SR16_H1.C9a_01066	SR17_H1.C9b_01013	SR18_H1.C10_01063	SR19_H1.C11_01063		SR20_H1.C12_01932	SR21_H1.C13_01014	SR22_H1.C14_00950	SR23_H1.C15a_01932	SR24_H1.C15b_00951	SR25_H1.C16_01064					SR2_H1.C1b_01062											SR3_H1.C2_00951
group_413		hypothetical protein	24	24	1	104	118	104	34		311	590	578	SR10_H1.C6a_01931		SR12_H1.C7a_01902	SR13_H1.C7b_00952	SR14_H1.C7c_01934	SR15_H1.C8_00950	SR16_H1.C9a_01067	SR17_H1.C9b_01012	SR18_H1.C10_01064	SR19_H1.C11_01064		SR20_H1.C12_01933	SR21_H1.C13_01013	SR22_H1.C14_00951	SR23_H1.C15a_01933	SR24_H1.C15b_00952	SR25_H1.C16_01065					SR2_H1.C1b_01063											SR3_H1.C2_00952
group_544		hypothetical protein	24	24	1	104	21	104	82		425	425	425	SR10_H1.C6a_01883		SR12_H1.C7a_01950	SR13_H1.C7b_00904	SR14_H1.C7c_01886	SR15_H1.C8_00903	SR16_H1.C9a_01019	SR17_H1.C9b_01060	SR18_H1.C10_01017	SR19_H1.C11_01016		SR20_H1.C12_01885	SR21_H1.C13_01061	SR22_H1.C14_00904	SR23_H1.C15a_01886	SR24_H1.C15b_00904	SR25_H1.C16_01017					SR2_H1.C1b_01015											SR3_H1.C2_00904
group_572		hypothetical protein	24	24	1	104	122	104	38		353	353	353	SR10_H1.C6a_01927		SR12_H1.C7a_01906	SR13_H1.C7b_00948	SR14_H1.C7c_01930	SR15_H1.C8_00946	SR16_H1.C9a_01063	SR17_H1.C9b_01016	SR18_H1.C10_01061	SR19_H1.C11_01060		SR20_H1.C12_01929	SR21_H1.C13_01017	SR22_H1.C14_00947	SR23_H1.C15a_01929	SR24_H1.C15b_00948	SR25_H1.C16_01061					SR2_H1.C1b_01060											SR3_H1.C2_00948
group_577		hypothetical protein	24	24	1	104	109	104	1		305	305	305	SR10_H1.C6a_01939		SR12_H1.C7a_01894	SR13_H1.C7b_00960	SR14_H1.C7c_01942	SR15_H1.C8_00958	SR16_H1.C9a_01075	SR17_H1.C9b_01004	SR18_H1.C10_01072	SR19_H1.C11_01072		SR20_H1.C12_01941	SR21_H1.C13_01005	SR22_H1.C14_00959	SR23_H1.C15a_01941	SR24_H1.C15b_00960	SR25_H1.C16_01073					SR2_H1.C1b_01071											SR3_H1.C2_00960
group_686		hypothetical protein	24	24	1	103	13	103	23		1634	1634	1634																			SR27_H3.C1a_01995	SR28_H3.C1b_01981	SR29_H3.C1c_00727		SR30_H3.C1d_01994	SR31_H3.C2a_02000	SR32_H3.C2b_00891	SR33_H3.C3a_01948	SR34_H3.C3b_01993	SR35_H3.C3c_01995	SR36_H3.C4_00894	SR37_H3.C5_01997	SR38_H3.C6a_01992	SR39_H3.C6b_01992			SR41_H3.C7b_00893	SR42_H3.C8a_01989
group_253		terminase large subunit	23	23	1	104	49	104	106		902	1703	1633	SR10_H1.C6a_01905		SR12_H1.C7a_01928	SR13_H1.C7b_00926	SR14_H1.C7c_01908	SR15_H1.C8_00925	SR16_H1.C9a_01041	SR17_H1.C9b_01038	SR18_H1.C10_01039	SR19_H1.C11_01038		SR20_H1.C12_01907	SR21_H1.C13_01039	SR22_H1.C14_00926	SR23_H1.C15a_01908	SR24_H1.C15b_00926	SR25_H1.C16_01039					SR2_H1.C1b_01037											SR3_H1.C2_00926
group_545		hypothetical protein	23	23	1	104	22	104	83		311	311	311	SR10_H1.C6a_01884		SR12_H1.C7a_01949	SR13_H1.C7b_00905	SR14_H1.C7c_01887	SR15_H1.C8_00904	SR16_H1.C9a_01020	SR17_H1.C9b_01059	SR18_H1.C10_01018	SR19_H1.C11_01017		SR20_H1.C12_01886	SR21_H1.C13_01060	SR22_H1.C14_00905	SR23_H1.C15a_01887	SR24_H1.C15b_00905	SR25_H1.C16_01018					SR2_H1.C1b_01016											SR3_H1.C2_00905
group_546		hypothetical protein	23	23	1	104	23	104	84		506	506	506	SR10_H1.C6a_01885		SR12_H1.C7a_01948	SR13_H1.C7b_00906	SR14_H1.C7c_01888	SR15_H1.C8_00905	SR16_H1.C9a_01021	SR17_H1.C9b_01058	SR18_H1.C10_01019	SR19_H1.C11_01018		SR20_H1.C12_01887	SR21_H1.C13_01059	SR22_H1.C14_00906	SR23_H1.C15a_01888	SR24_H1.C15b_00906	SR25_H1.C16_01019					SR2_H1.C1b_01017											SR3_H1.C2_00906
group_564		hypothetical protein	23	23	1	104	56	104	114		146	146	146	SR10_H1.C6a_01911		SR12_H1.C7a_01922	SR13_H1.C7b_00932	SR14_H1.C7c_01914	SR15_H1.C8_00930	SR16_H1.C9a_01047	SR17_H1.C9b_01032	SR18_H1.C10_01045	SR19_H1.C11_01044		SR20_H1.C12_01913	SR21_H1.C13_01033	SR22_H1.C14_00931	SR23_H1.C15a_01913	SR24_H1.C15b_00932	SR25_H1.C16_01045					SR2_H1.C1b_01044											SR3_H1.C2_00932
group_571		VRR-NUC domain-containing protein	23	23	1	104	125	104	41		311	311	311	SR10_H1.C6a_01924		SR12_H1.C7a_01909	SR13_H1.C7b_00945	SR14_H1.C7c_01927	SR15_H1.C8_00943	SR16_H1.C9a_01060	SR17_H1.C9b_01019	SR18_H1.C10_01058	SR19_H1.C11_01057		SR20_H1.C12_01926	SR21_H1.C13_01020	SR22_H1.C14_00944	SR23_H1.C15a_01926	SR24_H1.C15b_00945	SR25_H1.C16_01058					SR2_H1.C1b_01057											SR3_H1.C2_00945
group_573		putative HNHc nuclease	23	23	1	104	117	104	33		665	665	665	SR10_H1.C6a_01932		SR12_H1.C7a_01901	SR13_H1.C7b_00953	SR14_H1.C7c_01935	SR15_H1.C8_00951	SR16_H1.C9a_01068	SR17_H1.C9b_01011	SR18_H1.C10_01065	SR19_H1.C11_01065		SR20_H1.C12_01934	SR21_H1.C13_01012	SR22_H1.C14_00952	SR23_H1.C15a_01934	SR24_H1.C15b_00953	SR25_H1.C16_01066					SR2_H1.C1b_01064											SR3_H1.C2_00953
group_574		siphovirus Gp157 family protein	23	23	1	104	114	104	30		485	485	485	SR10_H1.C6a_01935		SR12_H1.C7a_01898	SR13_H1.C7b_00956	SR14_H1.C7c_01938	SR15_H1.C8_00954	SR16_H1.C9a_01071	SR17_H1.C9b_01008	SR18_H1.C10_01068	SR19_H1.C11_01068		SR20_H1.C12_01937	SR21_H1.C13_01009	SR22_H1.C14_00955	SR23_H1.C15a_01937	SR24_H1.C15b_00956	SR25_H1.C16_01069					SR2_H1.C1b_01067											SR3_H1.C2_00956
group_575		hypothetical protein	23	23	1	104	113	104	29		185	185	185	SR10_H1.C6a_01936		SR12_H1.C7a_01897	SR13_H1.C7b_00957	SR14_H1.C7c_01939	SR15_H1.C8_00955	SR16_H1.C9a_01072	SR17_H1.C9b_01007	SR18_H1.C10_01069	SR19_H1.C11_01069		SR20_H1.C12_01938	SR21_H1.C13_01008	SR22_H1.C14_00956	SR23_H1.C15a_01938	SR24_H1.C15b_00957	SR25_H1.C16_01070					SR2_H1.C1b_01068											SR3_H1.C2_00957
group_259		hypothetical protein	22	22	1	104	120	104	36		623	1130	1060	SR10_H1.C6a_01929		SR12_H1.C7a_01904	SR13_H1.C7b_00950	SR14_H1.C7c_01932	SR15_H1.C8_00948	SR16_H1.C9a_01065	SR17_H1.C9b_01014		SR19_H1.C11_01062		SR20_H1.C12_01931	SR21_H1.C13_01015	SR22_H1.C14_00949	SR23_H1.C15a_01931	SR24_H1.C15b_00950	SR25_H1.C16_01063																SR3_H1.C2_00950
group_7		MSCRAMM family adhesin	22	22	1	104	161	104	192		131	3047	2038	SR10_H1.C6a_02102	SR11_H1.C6b_02039	SR12_H1.C7a_02110	SR13_H1.C7b_02112	SR14_H1.C7c_02098	SR15_H1.C8_02101		SR17_H1.C9b_02071	SR18_H1.C10_02097	SR19_H1.C11_02070		SR20_H1.C12_02111	SR21_H1.C13_02087	SR22_H1.C14_02104	SR23_H1.C15a_02105	SR24_H1.C15b_02147	SR25_H1.C16_02146	SR26_H2.C1_01198			SR29_H3.C1c_00067			SR31_H3.C2a_00355
group_718		hypothetical protein	22	22	1	104	75	104	62		470	470	470																									SR32_H3.C2b_02228	SR33_H3.C3a_02230			SR36_H3.C4_02065
group_740		hypothetical protein	22	22	1	104	77	104	64		170	170	170																									SR32_H3.C2b_02227	SR33_H3.C3a_02229			SR36_H3.C4_02064
group_55		hypothetical protein	21	21	1	104	126	104	48	Hypothetical protein with no hits to refseq/uniprot/clusters/cdd/tigrfams/pfam overlapping another protein with hits	158	707	359																		SR26_H2.C1_00702	SR27_H3.C1a_02282	SR28_H3.C1b_02283	SR29_H3.C1c_02272		SR30_H3.C1d_02278	SR31_H3.C2a_02281			SR34_H3.C3b_02280	SR35_H3.C3c_02262		SR37_H3.C5_02284	SR38_H3.C6a_02279	SR39_H3.C6b_02280			SR41_H3.C7b_02282
group_447		hypothetical protein	19	19	1	103	2	103	7		314	338	315																		SR26_H2.C1_01931
group_679		hypothetical protein	19	19	1	103	30	103	9		452	452	452																		SR26_H2.C1_01932
group_12		hypothetical protein	16	16	1	104	91	104	4		1442	1838	1659		SR11_H1.C6b_01066									SR1_H1.C1a_01099
group_974		hypothetical protein	15	15	1	92	1	92	1	Investigate	1448	1448	1448				SR13_H1.C7b_01098	SR14_H1.C7c_00835	SR15_H1.C8_01095	SR16_H1.C9a_01532		SR18_H1.C10_01210	SR19_H1.C11_01210		SR20_H1.C12_00946		SR22_H1.C14_01096		SR24_H1.C15b_01097	SR25_H1.C16_01210																SR3_H1.C2_01210
group_101		competence protein CoiA	14	14	1	91	1	91	1	Investigate	866	899	891
group_517		hypothetical protein	14	14	1	103	26	103	3		2210	2228	2225	SR10_H1.C6a_01167			SR13_H1.C7b_01348		SR15_H1.C8_01316					SR1_H1.C1a_01278				SR23_H1.C15a_00904	SR24_H1.C15b_01318						SR2_H1.C1b_01459											SR3_H1.C2_01346
group_74		PTS sugar transporter subunit IIC	14	14	1	104	144	104	178		182	182	182
group_779		hypothetical protein	14	14	1	104	137	104	172		206	206	206
group_819		hypothetical protein	14	14	1	103	12	103	17		551	551	551
group_821		Crp/Fnr family transcriptional regulator	13	13	1	101	1	101	5		617	617	617
group_822		hypothetical protein	13	13	1	101	2	101	6		446	446	446
group_823		universal stress protein	13	13	1	101	3	101	7		188	188	188
group_827		hypothetical protein	13	13	1	101	7	101	11		524	524	524
group_828		SDR family oxidoreductase	13	13	1	101	8	101	12		737	737	737
group_829		oxidoreductase	13	13	1	101	9	101	4		971	971	971
group_832		hypothetical protein	13	13	1	101	12	101	1		437	437	437
group_833		hypothetical protein	13	13	1	100	1	100	1		1826	1826	1826
group_834		hypothetical protein	13	13	1	100	9	100	2		713	713	713
group_835		hypothetical protein	13	13	1	100	8	100	3		194	194	194
group_836		hypothetical protein	13	13	1	100	7	100	9		134	134	134
group_838		hypothetical protein	13	13	1	100	5	100	7		548	548	548
group_839		hypothetical protein	13	13	1	100	4	100	6		1493	1493	1493
group_840		hypothetical protein	13	13	1	100	3	100	5		221	221	221
group_841		hypothetical protein	13	13	1	100	2	100	4		149	149	149
group_842		IS6 family transposase IS431R	13	13	1	90	1	90	1	Investigate	674	674	674
hadL		(S)-2-haloacid dehalogenase	13	13	1	101	11	101	2		668	668	668
hxlA_2		3-hexulose-6-phosphate synthase	13	13	1	101	5	101	9		632	632	632
hxlB_2		6-phospho-3-hexuloisomerase	13	13	1	101	6	101	10		551	551	551
hxlR		HTH-type transcriptional activator HxlR	13	13	1	101	4	101	8		344	344	344
ohrR		Organic hydroperoxide resistance transcriptional regulator	13	13	1	101	10	101	3		419	419	419
xerD_2		site-specific tyrosine recombinase XerD	13	13	1	100	6	100	8		950	950	950
group_817		hypothetical protein	12	12	1	104	192	104	157		92	92	92
group_264		MFS transporter	11	11	1	104	155	104	188		554	1391	1010		SR11_H1.C6b_01912							SR18_H1.C10_01984		SR1_H1.C1a_01919							SR26_H2.C1_01256				SR2_H1.C1b_01965
group_468		hypothetical protein	11	11	1	104	1	104	136		401	401	401
group_765		hypothetical protein	11	11	1	104	2	104	133		323	323	323
group_114		hypothetical protein	10	10	1	104	139	104	216		278	278	278
group_122		hypothetical protein	10	10	1	104	12	104	125		1265	1265	1265
group_14		hypothetical protein	10	10	1	104	99	104	2		1838	1838	1838				SR13_H1.C7b_00976			SR16_H1.C9a_01091		SR18_H1.C10_01088	SR19_H1.C11_01088			SR21_H1.C13_00989									SR2_H1.C1b_01087											SR3_H1.C2_00976
group_196		flavin reductase family protein	10	10	1	103	4	103	30		89	683	564
group_291		helix-turn-helix domain-containing protein	10	10	1	95	1	94	1	Investigate	497	497	497																			SR27_H3.C1a_02181					SR31_H3.C2a_02180				SR35_H3.C3c_02140		SR37_H3.C5_02183	SR38_H3.C6a_02178	SR39_H3.C6b_02178				SR42_H3.C8a_02209
group_321		hypothetical protein	10	10	1	104	136	104	174		365	776	447
group_470		phage head morphogenesis protein	10	10	1	104	10	104	123		941	941	941
group_795		transcriptional regulator	10	10	1	104	15	104	128		422	422	422
group_796		hypothetical protein	10	10	1	104	14	104	127		569	569	569
group_797		terminase small subunit	10	10	1	104	13	104	126		488	488	488
group_798		phage portal protein	10	10	1	104	11	104	124		1400	1400	1400
group_799		phage scaffolding protein	10	10	1	104	9	104	122		599	599	599
group_800		N4-gp56 family major capsid protein	10	10	1	104	8	104	121		830	830	830
group_801		hypothetical protein	10	10	1	104	7	104	120		281	281	281
group_802		phage head-tail connector protein	10	10	1	104	6	104	119		296	296	296
group_803		hypothetical protein	10	10	1	104	3	104	116		674	674	674
group_804		HK97 gp10 family phage protein	10	10	1	104	4	104	117		266	266	266
group_805		phage head-tail adapter protein	10	10	1	104	5	104	118		335	335	335
group_167		FusB/FusC family EF-G-binding protein	9	9	1	98	6	98	6		251	251	251
group_173		VOC family protein	9	9	1	98	4	98	4		95	767	692																		SR26_H2.C1_00852
group_177		AEC family transporter	9	9	1	98	2	98	2		296	914	845																		SR26_H2.C1_00844
group_279		putative DNA binding domain-containing protein	9	9	1	104	152	104	184		758	758	758	SR10_H1.C6a_01989				SR14_H1.C7c_01992								SR21_H1.C13_01991		SR23_H1.C15a_01991							SR2_H1.C1b_01994											SR3_H1.C2_01989
cas9_2		type II CRISPR RNA-guided endonuclease Cas9	8	8	1	104	194	104	147		572	572	572
group_105		hypothetical protein	8	8	1	102	39	102	49		143	383	333																SR24_H1.C15b_01972	SR25_H1.C16_01971												SR36_H3.C4_01998			SR39_H3.C6b_02311				SR42_H3.C8a_02037
group_175		aminotransferase class I/II-fold pyridoxal phosphate-dependent enzyme	8	8	1	98	3	98	3		566	566	566
group_304		hypothetical protein	8	8	1	102	46	102	55		290	2192	1746																SR24_H1.C15b_01963	SR25_H1.C16_01962												SR36_H3.C4_02002							SR42_H3.C8a_02041
group_308		hypothetical protein	8	8	1	102	9	102	18		245	587	543																SR24_H1.C15b_02256	SR25_H1.C16_02256												SR36_H3.C4_01968							SR42_H3.C8a_02007
group_318		hypothetical protein	8	8	1	104	141	104	175		248	248	248
group_439		hypothetical protein	8	8	1	102	29	102	39		374	383	381																SR24_H1.C15b_01982	SR25_H1.C16_01981												SR36_H3.C4_01988							SR42_H3.C8a_02027
group_496		hypothetical protein	8	8	1	86	1	86	1	Investigate	1406	1406	1406	SR10_H1.C6a_01058		SR12_H1.C7a_00948					SR17_H1.C9b_01322			SR1_H1.C1a_00946		SR21_H1.C13_01323		SR23_H1.C15a_01042							SR2_H1.C1b_01321
group_647		hypothetical protein	8	8	1	102	24	102	34		272	272	272																SR24_H1.C15b_01987	SR25_H1.C16_01986												SR36_H3.C4_01983							SR42_H3.C8a_02022
group_68		type II secretion system F family protein	8	8	1	104	193	104	146		242	242	242
clpE		ATP-dependent Clp protease ATP-binding subunit ClpE	7	7	1	102	56	102	5		920	1928	1784																SR24_H1.C15b_01954	SR25_H1.C16_01953												SR36_H3.C4_02012							SR42_H3.C8a_02051
group_218		YeeE/YedE family protein	7	7	1	87	2	87	3		182	1082	824																													SR36_H3.C4_01604
group_305		hypothetical protein	7	7	1	102	43	102	52		200	599	540																SR24_H1.C15b_01971	SR25_H1.C16_01970												SR36_H3.C4_01999							SR42_H3.C8a_02038
group_433		hypothetical protein	7	7	1	102	55	102	4		506	1214	1112																SR24_H1.C15b_01953	SR25_H1.C16_01952												SR36_H3.C4_02013							SR42_H3.C8a_02052
group_438		hypothetical protein	7	7	1	102	30	102	40		338	725	669																SR24_H1.C15b_01981	SR25_H1.C16_01980												SR36_H3.C4_01989							SR42_H3.C8a_02028
group_440		hypothetical protein	7	7	1	102	19	102	29		281	395	378																SR24_H1.C15b_01992	SR25_H1.C16_01991												SR36_H3.C4_01978							SR42_H3.C8a_02017
group_441		hypothetical protein	7	7	1	102	18	102	28		539	986	922																SR24_H1.C15b_01993	SR25_H1.C16_01992												SR36_H3.C4_01977							SR42_H3.C8a_02016
group_442		hypothetical protein	7	7	1	102	17	102	27		260	341	329																SR24_H1.C15b_01994	SR25_H1.C16_01993												SR36_H3.C4_01976							SR42_H3.C8a_02015
group_443		Y-family DNA polymerase	7	7	1	102	15	102	24		554	1259	1158																SR24_H1.C15b_01997	SR25_H1.C16_01996												SR36_H3.C4_01974							SR42_H3.C8a_02013
group_444		hypothetical protein	7	7	1	102	12	102	21		329	767	704																SR24_H1.C15b_02000	SR25_H1.C16_01999												SR36_H3.C4_01971							SR42_H3.C8a_02010
group_58		hypothetical protein	7	7	1	89	1	89	3		1166	2813	2444			SR12_H1.C7a_02129						SR18_H1.C10_02116																		SR34_H3.C3b_02181								SR41_H3.C7b_02183
group_628		hypothetical protein	7	7	1	102	48	102	57		293	293	293																SR24_H1.C15b_01961	SR25_H1.C16_01960												SR36_H3.C4_02004							SR42_H3.C8a_02043
group_629		hypothetical protein	7	7	1	102	47	102	56		224	224	224																SR24_H1.C15b_01962	SR25_H1.C16_01961												SR36_H3.C4_02003							SR42_H3.C8a_02042
group_638		hypothetical protein	7	7	1	102	36	102	46		593	593	593																SR24_H1.C15b_01975	SR25_H1.C16_01974												SR36_H3.C4_01995							SR42_H3.C8a_02034
group_642		hypothetical protein	7	7	1	102	31	102	41		320	320	320																SR24_H1.C15b_01980	SR25_H1.C16_01979												SR36_H3.C4_01990							SR42_H3.C8a_02029
group_646		hypothetical protein	7	7	1	102	25	102	35		287	287	287																SR24_H1.C15b_01986	SR25_H1.C16_01985												SR36_H3.C4_01984							SR42_H3.C8a_02023
group_649		hypothetical protein	7	7	1	102	22	102	32		425	425	425																SR24_H1.C15b_01989	SR25_H1.C16_01988												SR36_H3.C4_01981							SR42_H3.C8a_02020
group_652		hypothetical protein	7	7	1	102	14	102	23	Hypothetical protein with no hits to refseq/uniprot/clusters/cdd/tigrfams/pfam overlapping another protein with hits	167	167	167																SR24_H1.C15b_01998	SR25_H1.C16_01997												SR36_H3.C4_01973							SR42_H3.C8a_02012
group_656		hypothetical protein	7	7	1	102	7	102	16		959	959	959																SR24_H1.C15b_02254	SR25_H1.C16_02254												SR36_H3.C4_01966							SR42_H3.C8a_02005
group_84		hypothetical protein	7	7	1	87	1	87	2		155	989	393																													SR36_H3.C4_01601
group_19		hypothetical protein	6	6	1	89	2	89	2		1457	2723	2301			SR12_H1.C7a_02128						SR18_H1.C10_02115																		SR34_H3.C3b_02180								SR41_H3.C7b_02182
group_280		putative DNA binding domain-containing protein	6	6	1	104	151	104	183		758	758	758		SR11_H1.C6b_01883				SR15_H1.C8_01954			SR18_H1.C10_01955		SR1_H1.C1a_01890			SR22_H1.C14_01955
group_306		hypothetical protein	6	6	1	102	16	102	26		143	821	482																SR24_H1.C15b_01995	SR25_H1.C16_01994												SR36_H3.C4_01975							SR42_H3.C8a_02014
group_435		hypothetical protein	6	6	1	102	58	102	7		299	299	299																SR24_H1.C15b_01956	SR25_H1.C16_01955												SR36_H3.C4_02010							SR42_H3.C8a_02049
group_437		hypothetical protein	6	6	1	102	32	102	42		131	131	131																SR24_H1.C15b_01979	SR25_H1.C16_01978												SR36_H3.C4_01991							SR42_H3.C8a_02030
group_622		hypothetical protein	6	6	1	102	54	102	3		863	863	863																SR24_H1.C15b_01952	SR25_H1.C16_01951												SR36_H3.C4_02014							SR42_H3.C8a_02053
group_623		hypothetical protein	6	6	1	102	57	102	6		3305	3305	3305																SR24_H1.C15b_01955	SR25_H1.C16_01954												SR36_H3.C4_02011							SR42_H3.C8a_02050
group_630		hypothetical protein	6	6	1	102	45	102	54		881	881	881																SR24_H1.C15b_01964	SR25_H1.C16_01963												SR36_H3.C4_02001							SR42_H3.C8a_02040
group_631		hypothetical protein	6	6	1	102	44	102	53		2030	2030	2030																SR24_H1.C15b_01965	SR25_H1.C16_01964												SR36_H3.C4_02000							SR42_H3.C8a_02039
group_636		hypothetical protein	6	6	1	102	38	102	48		1316	1316	1316																SR24_H1.C15b_01973	SR25_H1.C16_01972												SR36_H3.C4_01997							SR42_H3.C8a_02036
group_637		hypothetical protein	6	6	1	102	37	102	47		536	536	536																SR24_H1.C15b_01974	SR25_H1.C16_01973												SR36_H3.C4_01996							SR42_H3.C8a_02035
group_639		hypothetical protein	6	6	1	102	35	102	45		356	356	356																SR24_H1.C15b_01976	SR25_H1.C16_01975												SR36_H3.C4_01994							SR42_H3.C8a_02033
group_640		hypothetical protein	6	6	1	102	34	102	44		278	278	278																SR24_H1.C15b_01977	SR25_H1.C16_01976												SR36_H3.C4_01993							SR42_H3.C8a_02032
group_641		hypothetical protein	6	6	1	102	33	102	43		812	812	812																SR24_H1.C15b_01978	SR25_H1.C16_01977												SR36_H3.C4_01992							SR42_H3.C8a_02031
group_643		hypothetical protein	6	6	1	102	28	102	38		2354	2354	2354																SR24_H1.C15b_01983	SR25_H1.C16_01982												SR36_H3.C4_01987							SR42_H3.C8a_02026
group_644		hypothetical protein	6	6	1	102	27	102	37		665	665	665																SR24_H1.C15b_01984	SR25_H1.C16_01983												SR36_H3.C4_01986							SR42_H3.C8a_02025
group_645		hypothetical protein	6	6	1	102	26	102	36		746	746	746																SR24_H1.C15b_01985	SR25_H1.C16_01984												SR36_H3.C4_01985							SR42_H3.C8a_02024
group_648		hypothetical protein	6	6	1	102	23	102	33		506	506	506																SR24_H1.C15b_01988	SR25_H1.C16_01987												SR36_H3.C4_01982							SR42_H3.C8a_02021
group_650		hypothetical protein	6	6	1	102	21	102	31		620	620	620																SR24_H1.C15b_01990	SR25_H1.C16_01989												SR36_H3.C4_01980							SR42_H3.C8a_02019
group_651		teicoplanin resistance protein VanZ	6	6	1	102	20	102	30		1337	1337	1337																SR24_H1.C15b_01991	SR25_H1.C16_01990												SR36_H3.C4_01979							SR42_H3.C8a_02018
group_653		hypothetical protein	6	6	1	102	13	102	22		263	263	263																SR24_H1.C15b_01999	SR25_H1.C16_01998												SR36_H3.C4_01972							SR42_H3.C8a_02011
group_654		hypothetical protein	6	6	1	102	11	102	20		182	182	182																SR24_H1.C15b_02001	SR25_H1.C16_02000												SR36_H3.C4_01970							SR42_H3.C8a_02009
group_655		hypothetical protein	6	6	1	102	10	102	19		401	401	401																SR24_H1.C15b_02002	SR25_H1.C16_02001												SR36_H3.C4_01969							SR42_H3.C8a_02008
group_657		hypothetical protein	6	6	1	102	8	102	17		428	428	428																SR24_H1.C15b_02255	SR25_H1.C16_02255												SR36_H3.C4_01967							SR42_H3.C8a_02006
group_292		helix-turn-helix domain-containing protein	5	5	1	84	1	84	1	Investigate	497	497	497																					SR29_H3.C1c_02163					SR33_H3.C3a_02119			SR36_H3.C4_02163					SR40_H3.C7a_02134
group_466		hypothetical protein	5	5	1	102	51	102	10		1364	1490	1464																													SR36_H3.C4_02007							SR42_H3.C8a_02046
group_661		hypothetical protein	5	5	1	104	61	104	74		215	215	215																		SR26_H2.C1_00692																SR40_H3.C7a_02282		SR42_H3.C8a_02338
group_859		hypothetical protein	5	5	1	103	10	103	26		3986	3986	3986
group_18		hypothetical protein	4	4	1	83	1	82	1	Investigate	1457	1457	1457				SR13_H1.C7b_02114													SR25_H1.C16_02148
group_289		helix-turn-helix domain-containing protein	4	4	1	89	3	89	1		497	497	497																											SR34_H3.C3b_02179								SR41_H3.C7b_02181
group_319		hypothetical protein	4	4	1	88	5	88	3		467	998	795																																		SR40_H3.C7a_02278
group_742		hypothetical protein	4	4	1	102	49	102	12		1154	1154	1154																													SR36_H3.C4_02005							SR42_H3.C8a_02044
group_743		hypothetical protein	4	4	1	102	50	102	11		503	503	503																													SR36_H3.C4_02006							SR42_H3.C8a_02045
group_744		hypothetical protein	4	4	1	102	52	102	9		569	569	569																													SR36_H3.C4_02008							SR42_H3.C8a_02047
group_745		hypothetical protein	4	4	1	102	53	102	8		896	896	896																													SR36_H3.C4_02009							SR42_H3.C8a_02048
group_746		SdpI family protein	4	4	1	88	1	88	1		335	335	335																													SR36_H3.C4_02298					SR40_H3.C7a_02276
group_747		hypothetical protein	4	4	1	88	4	88	2		182	182	182																													SR36_H3.C4_02299					SR40_H3.C7a_02277
group_754		hypothetical protein	4	4	1	99	1	99	1		188	188	188
deoB		Phosphopentomutase	3	3	1	75	1	78	1	Investigate	611	611	611																																		SR40_H3.C7a_02290		SR42_H3.C8a_02355
group_104		formate/nitrite transporter family protein	3	3	1	104	145	104	176		248	248	248
group_17		hypothetical protein	3	3	1	79	1	75	1	Investigate	1457	2723	1879																				SR28_H3.C1b_02167
group_232		RNA-binding transcriptional accessory protein	3	3	1	77	1	76	2	Investigate	1967	2153	2029
group_242		DEAD/DEAH box helicase family protein	3	3	1	104	90	104	6		365	365	365												SR20_H1.C12_01816			SR23_H1.C15a_01859
group_299		hypothetical protein	3	3	1	80	1	79	1	Investigate	596	662	618							SR16_H1.C9a_02193			SR19_H1.C11_02203
group_3		hypothetical protein	3	3	1	104	150	104	187		119	4166	2817
group_307		hypothetical protein	3	3	1	102	6	102	25		377	377	377																SR24_H1.C15b_01996	SR25_H1.C16_01995
group_36		hypothetical protein	3	3	1	104	201	104	152		551	551	551							SR16_H1.C9a_00450																							SR37_H3.C5_00617
group_477		hypothetical protein	3	3	1	103	6	103	10		914	1010	946
deoB_2		Phosphopentomutase	3	3	1						233	902	679
group_752		protein rep	3	3	1	76	2	77	1	Investigate	998	998	998																																			SR41_H3.C7b_02298
group_753		hypothetical protein	3	3	1	76	1	77	2	Investigate	344	344	344																																			SR41_H3.C7b_02299
group_794		hypothetical protein	3	3	1	104	16	104	129		146	146	146
panC_2		pantoate--beta-alanine ligase	3	3	1	104	153	104	185		362	788	504							SR16_H1.C9a_02194
cas10_1		type III-A CRISPR-associated protein Cas10/Csm1	2	2	1	103	18	103	13		212	212	212
group_10		hypothetical protein	2	2	1	104	95	104	7		1838	1838	1838	SR10_H1.C6a_01835				SR14_H1.C7c_01838
group_11		hypothetical protein	2	2	1	104	94	104	9		1838	1838	1838			SR12_H1.C7a_01836									SR20_H1.C12_01837
group_112		hypothetical protein	2	2	1	104	140	104	212		278	278	278																																		SR40_H3.C7a_02042		SR42_H3.C8a_02097
pepF_1		oligoendopeptidase F	2	2	1						368	368	368
ptsG_1		glucose-specific PTS transporter subunit IIBC	2	2	1						863	2036	1449				SR13_H1.C7b_00143
group_149		TIGR01212 family radical SAM protein	2	2	1	104	203	104	143		257	257	257
group_152		class I SAM-dependent methyltransferase	2	2	1	57	1	74	1	Investigate	242	242	242
group_165		glycosyltransferase family 4 protein	2	2	1	104	143	104	179		395	395	395
group_190		ABC transporter ATP-binding protein	2	2	1	61	1	64	1	Investigate	275	275	275
group_194		hypothetical protein	2	2	1	103	5	103	28		245	245	245
group_211		YfhO family protein	2	2	1	74	1	62	1	Investigate	974	974	974
group_226		ABC transporter ATP-binding protein/permease	2	2	1	62	1	63	1	Investigate	560	560	560
group_231		MFS transporter	2	2	1	104	24	104	78		398	398	398
group_240		aminoacyltransferase	2	2	1	104	98	104	3		425	425	425
group_246		alpha/beta hydrolase	2	2	1	103	22	103	16		485	485	485
secA2_2		accessory Sec system translocase SecA2	2	2	1						317	317	317
group_278		putative DNA binding domain-containing protein	2	2	1	58	1	70	1	Investigate	758	758	758																SR24_H1.C15b_02006	SR25_H1.C16_02005
group_287		alanine:cation symporter family protein	2	2	1	64	1	72	1	Investigate	680	680	680
group_290		helix-turn-helix domain-containing protein	2	2	1	68	1	67	1	Investigate	497	497	497																							SR30_H3.C1d_02136		SR32_H3.C2b_02090
group_297		bifunctional metallophosphatase/5'-nucleotidase	2	2	1	104	63	104	50		239	1520	879																		SR26_H2.C1_02174
cas9_2		type II CRISPR RNA-guided endonuclease Cas9	2	2	1	104	194	104	147		2588	2588	2588
group_402		N-acetylmuramoyl-L-alanine amidase	2	2	1	59	1	73	1	Investigate	884	884	884
group_432		hypothetical protein	2	2	1	70	2	59	2	Investigate	425	425	425					SR14_H1.C7c_02215				SR18_H1.C10_02206
group_436		hypothetical protein	2	2	1	102	41	102	50		287	293	290																SR24_H1.C15b_01969	SR25_H1.C16_01968
group_474		hypothetical protein	2	2	1	67	1	57	1	Investigate	383	707	545
group_475		hypothetical protein	2	2	1	78	2	81	2		590	590	590
group_476		hypothetical protein	2	2	1	78	3	81	3		140	140	140
group_478		hypothetical protein	2	2	1	103	21	103	19		1175	1457	1316
group_54		MucBP domain-containing protein	2	2	1	87	3	87	1		4253	4253	4253
group_59		hypothetical protein	2	2	1	69	1	69	1	Investigate	2579	2813	2696																		SR26_H2.C1_02208
group_624		hypothetical protein	2	2	1	102	59	102	2		896	896	896																SR24_H1.C15b_01957	SR25_H1.C16_01956
group_625		hypothetical protein	2	2	1	102	1	102	1		581	581	581																SR24_H1.C15b_01958	SR25_H1.C16_01957
group_626		hypothetical protein	2	2	1	102	2	102	58		1490	1490	1490																SR24_H1.C15b_01959	SR25_H1.C16_01958
group_627		hypothetical protein	2	2	1	102	3	102	59		1817	1817	1817																SR24_H1.C15b_01960	SR25_H1.C16_01959
group_632		hypothetical protein	2	2	1	102	5	102	15		611	611	611																SR24_H1.C15b_01966	SR25_H1.C16_01965
group_633		hypothetical protein	2	2	1	102	4	102	14		242	242	242																SR24_H1.C15b_01967	SR25_H1.C16_01966
group_634		hypothetical protein	2	2	1	102	40	102	13		578	578	578																SR24_H1.C15b_01968	SR25_H1.C16_01967
group_635		hypothetical protein	2	2	1	102	42	102	51		266	266	266																SR24_H1.C15b_01970	SR25_H1.C16_01969
group_784		hypothetical protein	2	2	1	104	202	104	142		296	296	296
group_785		hypothetical protein	2	2	1	103	3	103	31		1016	1016	1016
group_786		CPBP family intramembrane metalloprotease	2	2	1	103	1	103	6		596	596	596
group_793		hypothetical protein	2	2	1	103	17	103	18		1358	1358	1358
group_806		hypothetical protein	2	2	1	88	3	88	4		143	143	143
group_807		hypothetical protein	2	2	1	88	2	88	5		146	146	146
group_820		MSCRAMM family adhesin SdrC	2	2	1	103	7	103	11		278	278	278
group_852		hypothetical protein	2	2	1	65	1	60	1	Investigate	695	695	695
group_853		phosphopentomutase	2	2	1	103	19	103	14		269	269	269
group_854		hypothetical protein	2	2	1	103	15	103	21		1544	1544	1544
group_856		hypothetical protein	2	2	1	71	1	65	1	Investigate	1268	1268	1268
group_857		hypothetical protein	2	2	1	99	3	99	3		254	254	254
group_866		hypothetical protein	2	2	1	103	9	103	25		782	782	782
group_868		hypothetical protein	2	2	1	85	4	85	1		341	341	341
group_869		hypothetical protein	2	2	1	85	3	85	4		515	515	515
group_870		hypothetical protein	2	2	1	85	2	85	3		137	137	137
group_871		hypothetical protein	2	2	1	85	1	85	2		407	407	407
group_95		glycosyltransferase family 2 protein	2	2	1	60	1	68	1	Investigate	752	752	752
group_973		hypothetical protein	2	2	1	99	5	99	5		1388	1394	1391																		SR26_H2.C1_00504
group_98		hypothetical protein	2	2	1	104	154	104	186		125	125	125
lepB_3		signal peptidase I	2	2	1	73	1	58	1	Investigate	164	164	164
linA		Lincosamide resistance protein	2	2	1	72	2	66	3		485	485	485
aadK		Aminoglycoside 6-adenylyltransferase	1	1	1	82	2	83	5		848	848	848
abc-f_4		ABC-F type ribosomal protection protein	1	1	1	27	1	24	1	Investigate	317	317	317
deoC		deoxyribose-phosphate aldolase	1	1	1	26	1	27	1	Investigate	281	281	281
dgcC		putative diguanylate cyclase DgcC	1	1	1	51	1	3	1	Investigate	227	227	227							SR16_H1.C9a_02216
gmpC_1		dipeptide ABC transporter glycylmethionine-binding lipoprotein	1	1	1	104	156	104	189		116	116	116																		SR26_H2.C1_01249
group_113		hypothetical protein	1	1	1	104	138	104	213		278	278	278
group_117		hypothetical protein	1	1	1	104	142	104	199		404	404	404
group_13		hypothetical protein	1	1	1	104	93	104	8		1838	1838	1838															SR23_H1.C15a_01880
group_140		Y-family DNA polymerase	1	1	1	104	199	104	148		419	419	419							SR16_H1.C9a_00381
group_147		TSUP family transporter	1	1	1	104	204	104	144		353	353	353																													SR36_H3.C4_00523
group_155		phosphate--AMP phosphotransferase	1	1	1	104	148	104	194		275	275	275																SR24_H1.C15b_01717
group_161		amino acid ABC transporter permease	1	1	1	25	1	2	1	Investigate	263	263	263																		SR26_H2.C1_01554
group_163		sucrose-specific PTS transporter subunit IIBC	1	1	1	98	7	98	5		236	236	236
group_171		HTH domain-containing protein	1	1	1	104	147	104	177		233	233	233																SR24_H1.C15b_00666
group_178		DEAD/DEAH box helicase family protein	1	1	1	98	1	98	1		1754	1754	1754																		SR26_H2.C1_00793
group_185		nucleotidyltransferase	1	1	1	37	1	32	1	Investigate	104	104	104		SR11_H1.C6b_00913
group_21		hypothetical protein	1	1	1	19	1	20	1	Investigate	1457	1457	1457													SR21_H1.C13_02113
group_214		PLP-dependent aminotransferase family protein	1	1	1	49	1	28	1	Investigate	635	635	635			SR12_H1.C7a_01267
group_215		PLP-dependent aminotransferase family protein	1	1	1	1	1	31	1	Investigate	635	635	635					SR14_H1.C7c_01155
group_220		aldehyde dehydrogenase	1	1	1	14	1	48	1	Investigate	605	605	605
group_228		NAD(P)/FAD-dependent oxidoreductase	1	1	1	104	25	104	79		446	446	446																		SR26_H2.C1_00591
group_235		PH domain-containing protein	1	1	1	77	2	76	1	Investigate	296	296	296
group_252		phage portal protein	1	1	1	50	2	29	2	Investigate	392	392	392
group_255		terminase large subunit	1	1	1	104	18	104	76		821	821	821
group_276		putative DNA binding domain-containing protein	1	1	1	24	1	18	1	Investigate	758	758	758							SR16_H1.C9a_01958
group_277		putative DNA binding domain-containing protein	1	1	1	6	1	23	1	Investigate	758	758	758
group_283		AAA family ATPase	1	1	1	31	1	15	1	Investigate	1949	1949	1949	SR10_H1.C6a_02073
group_285		hypothetical protein	1	1	1	10	1	52	1	Investigate	161	161	161							SR16_H1.C9a_02187
group_293		helix-turn-helix domain-containing protein	1	1	1	21	1	12	1	Investigate	497	497	497
group_295		serine protease	1	1	1	104	62	104	49		389	389	389																		SR26_H2.C1_02176
group_301		hypothetical protein	1	1	1	39	1	1	1	Investigate	125	125	125
group_302		hypothetical protein	1	1	1	35	1	55	1	Investigate	125	125	125
group_303		hypothetical protein	1	1	1	29	1	8	1	Investigate	125	125	125												SR20_H1.C12_02229
group_310		hypothetical protein	1	1	1	103	31	103	8		1619	1619	1619																		SR26_H2.C1_01941
group_405		HK97 family phage prohead protease	1	1	1	50	1	29	1	Investigate	584	584	584
group_47		phage tail tape measure protein	1	1	1	104	34	104	94		1034	1034	1034
group_48		phage tail tape measure protein	1	1	1	38	1	34	1	Investigate	1526	1526	1526
group_608		hypothetical protein	1	1	1	4	1	22	1	Investigate	116	116	116							SR16_H1.C9a_02212
deoB_1		Phosphopentomutase	1	1	1						923	923	923
group_610		protein rep	1	1	1	56	1	13	1	Investigate	200	200	200							SR16_H1.C9a_02219
group_611		hypothetical protein	1	1	1	70	1	59	1	Investigate	608	608	608									SR18_H1.C10_02207
group_612		hypothetical protein	1	1	1	33	1	45	1	Investigate	452	452	452									SR18_H1.C10_02215
group_613		aldehyde dehydrogenase family protein	1	1	1	5	1	9	1	Investigate	305	305	305									SR18_H1.C10_02220
group_616		hypothetical protein	1	1	1	17	1	16	1	Investigate	107	107	107									SR18_H1.C10_02226
group_617		hypothetical protein	1	1	1	23	1	38	1	Investigate	206	206	206									SR18_H1.C10_02230
group_618		hypothetical protein	1	1	1	103	8	103	12		1832	1832	1832										SR19_H1.C11_01922
group_619		hypothetical protein	1	1	1	43	1	50	1	Investigate	548	548	548												SR20_H1.C12_02220
group_620		hypothetical protein	1	1	1	43	2	50	2	Investigate	164	164	164												SR20_H1.C12_02221
group_64		hypothetical protein	1	1	1	104	198	104	151		137	137	137														SR22_H1.C14_00512
group_66		hypothetical protein	1	1	1	104	195	104	154		224	224	224
group_670		hypothetical protein	1	1	1	104	160	104	191		1025	1025	1025																		SR26_H2.C1_01197
group_70		transcription antiterminator	1	1	1	104	197	104	150		287	287	287				SR13_H1.C7b_00142
group_741		hypothetical protein	1	1	1	104	191	104	159		593	593	593																												SR35_H3.C3c_02099
group_749		hypothetical protein	1	1	1	34	1	41	1	Investigate	206	206	206																														SR37_H3.C5_02311
group_750		hypothetical protein	1	1	1	18	1	56	1	Investigate	200	200	200																															SR38_H3.C6a_02309
group_751		hypothetical protein	1	1	1	7	1	42	1	Investigate	179	179	179																																SR39_H3.C6b_02314
group_755		hypothetical protein	1	1	1	11	1	54	1	Investigate	602	602	602
group_756		hypothetical protein	1	1	1	12	1	7	1	Investigate	164	164	164
group_757		hypothetical protein	1	1	1	104	50	104	77		416	416	416
group_758		hypothetical protein	1	1	1	30	1	25	1	Investigate	404	404	404
group_759		hypothetical protein	1	1	1	82	1	83	1		383	383	383
group_762		hypothetical protein	1	1	1	82	5	83	3		116	116	116
group_763		hypothetical protein	1	1	1	82	4	83	2		455	455	455
group_764		hypothetical protein	1	1	1	104	35	104	92		929	929	929
group_766		hypothetical protein	1	1	1	104	60	104	138		215	215	215
group_767		hypothetical protein	1	1	1	44	1	30	1	Investigate	1358	1358	1358
group_768		XRE family transcriptional regulator	1	1	1	104	89	104	17		629	629	629
group_769		helix-turn-helix transcriptional regulator	1	1	1	104	88	104	16		227	227	227
group_770		hypothetical protein	1	1	1	104	87	104	15		218	218	218
group_771		hypothetical protein	1	1	1	104	86	104	14		332	332	332
group_773		HK97 gp10 family phage protein	1	1	1	104	211	104	141		413	413	413
group_8		MSCRAMM family adhesin	1	1	1	28	1	26	1	Investigate	2186	2186	2186																						SR2_H1.C1b_02201
group_80		hypothetical protein	1	1	1	36	1	10	1	Investigate	650	650	650
group_808		hypothetical protein	1	1	1	9	1	53	1	Investigate	110	110	110
group_809		protein rep	1	1	1	81	4	80	3		887	887	887
group_810		hypothetical protein	1	1	1	81	3	80	4		1217	1217	1217
group_811		hypothetical protein	1	1	1	81	2	80	2		476	476	476
group_812		hypothetical protein	1	1	1	81	1	80	1		242	242	242
group_813		protein rep	1	1	1	72	1	66	2		845	845	845
group_815		hypothetical protein	1	1	1	16	1	43	1	Investigate	569	569	569
group_82		FUSC family protein	1	1	1	48	1	35	1	Investigate	986	986	986																		SR26_H2.C1_01770
group_843		hypothetical protein	1	1	1	2	1	21	1	Investigate	230	230	230
group_844		hypothetical protein	1	1	1	22	1	6	1	Investigate	128	128	128
group_845		hypothetical protein	1	1	1	55	1	47	1	Investigate	185	185	185
group_846		hypothetical protein	1	1	1	13	1	51	1	Investigate	188	188	188
group_847		hypothetical protein	1	1	1	3	1	37	1	Investigate	125	125	125
group_848		hypothetical protein	1	1	1	47	1	40	1	Investigate	137	137	137
group_849		hypothetical protein	1	1	1	20	1	17	1	Investigate	170	170	170
group_850		hypothetical protein	1	1	1	8	1	5	1	Investigate	212	212	212
group_851		2-dehydropantoate 2-reductase	1	1	1	45	1	11	1	Investigate	518	518	518
group_855		hypothetical protein	1	1	1	103	14	103	20		1196	1196	1196
group_858		hypothetical protein	1	1	1	15	1	4	1	Investigate	161	161	161
group_860		hypothetical protein	1	1	1	40	1	36	1	Investigate	89	89	89
group_864		hypothetical protein	1	1	1	52	1	19	1	Investigate	158	158	158
group_865		hypothetical protein	1	1	1	78	1	81	1		476	476	476
group_867		hypothetical protein	1	1	1	72	3	66	1		1004	1004	1004
group_872		hypothetical protein	1	1	1	104	85	104	20		287	287	287
group_873		hypothetical protein	1	1	1	54	1	39	1	Investigate	1109	1109	1109
group_875		hypothetical protein	1	1	1	104	183	104	173		206	206	206
group_88		BglG family transcription antiterminator	1	1	1	41	1	44	1	Investigate	539	539	539							SR16_H1.C9a_01946
abc-f_3		ABC-F type ribosomal protection protein	1	1	1						317	317	317
nifS		Cysteine desulfurase NifS	1	1	1	53	1	46	1	Investigate	236	236	236																													SR36_H3.C4_02309
pepP		Xaa-Pro aminopeptidase	1	1	1	32	1	33	1	Investigate	191	191	191												SR20_H1.C12_02226
repD		Replication initiation protein	1	1	1	54	2	39	2	Investigate	944	944	944
repN		Replication initiation protein	1	1	1	82	3	83	4		944	944	944
rpoB_2		DNA-directed RNA polymerase subunit beta	1	1	1	46	1	49	1	Investigate	206	206	206									SR18_H1.C10_02225
[truncated: 45 more columns]

## Sheet: Table 3d
Table S3d: Genes unique for S. rostri new SCM isolates (n=35). The isolates are marked in color:
Gene	Non-unique Gene name	Annotation	No. isolates	No. sequences	Avg sequences per isolate	Genome Fragment	Order within Fragment	Accessory Fragment	Accessory Order with Fragment	QC	Min group size nuc	Max group size nuc	Avg group size nuc	SR10_H1.C6a	SR11_H1.C6b	SR12_H1.C7a	SR13_H1.C7b	SR14_H1.C7c	SR15_H1.C8	SR16_H1.C9a	SR17_H1.C9b	SR18_H1.C10	SR19_H1.C11	SR1_H1.C1a	SR20_H1.C12	SR21_H1.C13	SR22_H1.C14	SR23_H1.C15a	SR24_H1.C15b	SR25_H1.C16	SR26_H2.C1	SR27_H3.C1a	SR28_H3.C1b	SR29_H3.C1c	SR2_H1.C1b	SR30_H3.C1d	SR31_H3.C2a	SR32_H3.C2b	SR33_H3.C3a	SR34_H3.C3b	SR35_H3.C3c	SR36_H3.C4	SR37_H3.C5	SR38_H3.C6a	SR39_H3.C6b	SR3_H1.C2	SR40_H3.C7a	SR41_H3.C7b	SR42_H3.C8a
deoB		Phosphopentomutase	3	3	1	37	1	41	1	Investigate	611	611	611																																		SR40_H3.C7a_02290		SR42_H3.C8a_02355
group_477		hypothetical protein	3	3	1	38	1	39	1	Investigate	914	1010	946
group_752		protein rep	3	3	1	39	1	42	2	Investigate	998	998	998																																			SR41_H3.C7b_02298
group_753		hypothetical protein	3	3	1	39	2	42	1	Investigate	344	344	344																																			SR41_H3.C7b_02299
group_11		hypothetical protein	2	2	1	35	1	33	1	Investigate	1838	1838	1838			SR12_H1.C7a_01836									SR20_H1.C12_01837
group_112		hypothetical protein	2	2	1	34	1	35	1	Investigate	278	278	278																																		SR40_H3.C7a_02042		SR42_H3.C8a_02097
group_432		hypothetical protein	2	2	1	33	1	34	2	Investigate	425	425	425					SR14_H1.C7c_02215				SR18_H1.C10_02206
group_475		hypothetical protein	2	2	1	40	3	40	2		590	590	590
group_476		hypothetical protein	2	2	1	40	1	40	3		140	140	140
group_820		MSCRAMM family adhesin SdrC	2	2	1	36	1	36	1	Investigate	278	278	278
group_113		hypothetical protein	1	1	1	17	1	28	1	Investigate	278	278	278
group_21		hypothetical protein	1	1	1	9	1	11	1	Investigate	1457	1457	1457													SR21_H1.C13_02113
group_214		PLP-dependent aminotransferase family protein	1	1	1	1	1	30	1	Investigate	635	635	635			SR12_H1.C7a_01267
group_215		PLP-dependent aminotransferase family protein	1	1	1	14	1	14	1	Investigate	635	635	635					SR14_H1.C7c_01155
group_252		phage portal protein	1	1	1	21	2	4	1	Investigate	392	392	392
group_293		helix-turn-helix domain-containing protein	1	1	1	20	1	2	1	Investigate	497	497	497
group_302		hypothetical protein	1	1	1	4	1	17	1	Investigate	125	125	125
group_303		hypothetical protein	1	1	1	26	1	15	1	Investigate	125	125	125												SR20_H1.C12_02229
group_405		HK97 family phage prohead protease	1	1	1	21	1	4	2	Investigate	584	584	584
group_48		phage tail tape measure protein	1	1	1	11	1	24	1	Investigate	1526	1526	1526
group_611		hypothetical protein	1	1	1	33	2	34	1	Investigate	608	608	608									SR18_H1.C10_02207
group_612		hypothetical protein	1	1	1	32	1	22	1	Investigate	452	452	452									SR18_H1.C10_02215
group_613		aldehyde dehydrogenase family protein	1	1	1	18	1	7	1	Investigate	305	305	305									SR18_H1.C10_02220
group_616		hypothetical protein	1	1	1	5	1	27	1	Investigate	107	107	107									SR18_H1.C10_02226
group_617		hypothetical protein	1	1	1	10	1	12	1	Investigate	206	206	206									SR18_H1.C10_02230
group_618		hypothetical protein	1	1	1	27	1	1	1	Investigate	1832	1832	1832										SR19_H1.C11_01922
group_619		hypothetical protein	1	1	1	8	2	25	1	Investigate	548	548	548												SR20_H1.C12_02220
group_620		hypothetical protein	1	1	1	8	1	25	2	Investigate	164	164	164												SR20_H1.C12_02221
group_70		transcription antiterminator	1	1	1	28	1	20	1	Investigate	287	287	287				SR13_H1.C7b_00142
group_750		hypothetical protein	1	1	1	24	1	29	1	Investigate	200	200	200																															SR38_H3.C6a_02309
group_751		hypothetical protein	1	1	1	7	1	32	1	Investigate	179	179	179																																SR39_H3.C6b_02314
group_755		hypothetical protein	1	1	1	3	1	18	1	Investigate	602	602	602
group_756		hypothetical protein	1	1	1	22	1	21	1	Investigate	164	164	164
group_757		hypothetical protein	1	1	1	13	1	31	1	Investigate	416	416	416
group_758		hypothetical protein	1	1	1	2	1	16	1	Investigate	404	404	404
group_809		protein rep	1	1	1	42	1	38	4		887	887	887
group_810		hypothetical protein	1	1	1	42	2	38	3		1217	1217	1217
group_811		hypothetical protein	1	1	1	42	3	38	2		476	476	476
group_812		hypothetical protein	1	1	1	42	4	38	1		242	242	242
group_813		protein rep	1	1	1	19	1	23	1	Investigate	845	845	845
group_815		hypothetical protein	1	1	1	23	1	19	1	Investigate	569	569	569
group_843		hypothetical protein	1	1	1	25	1	13	1	Investigate	230	230	230
group_844		hypothetical protein	1	1	1	16	1	3	1	Investigate	128	128	128
group_845		hypothetical protein	1	1	1	31	1	6	1	Investigate	185	185	185
group_846		hypothetical protein	1	1	1	30	1	9	1	Investigate	188	188	188
group_850		hypothetical protein	1	1	1	29	1	26	1	Investigate	212	212	212
group_861		hypothetical protein	1	1	1	41	1	37	4		161	161	161
group_862		hypothetical protein	1	1	1	41	2	37	3		269	269	269
group_863		hypothetical protein	1	1	1	41	3	37	2		1109	1109	1109
group_864		hypothetical protein	1	1	1	41	4	37	1		158	158	158
group_865		hypothetical protein	1	1	1	40	2	40	1		476	476	476
group_875		hypothetical protein	1	1	1	6	1	5	1	Investigate	206	206	206
pepP		Xaa-Pro aminopeptidase	1	1	1	15	1	8	1	Investigate	191	191	191												SR20_H1.C12_02226
rpoB_2		DNA-directed RNA polymerase subunit beta	1	1	1	12	1	10	1	Investigate	206	206	206									SR18_H1.C10_02225
[truncated: 44 more columns]

## Sheet: Table 3e
Table S3e: Genes unique for S. rostri persistent SCM isolates (n=45). The isolates are marked in color:
Gene	Non-unique Gene name	Annotation	No. isolates	No. sequences	Avg sequences per isolate	Genome Fragment	Order within Fragment	Accessory Fragment	Accessory Order with Fragment	QC	Min group size nuc	Max group size nuc	Avg group size nuc	SR10_H1.C6a	SR11_H1.C6b	SR12_H1.C7a	SR13_H1.C7b	SR14_H1.C7c	SR15_H1.C8	SR16_H1.C9a	SR17_H1.C9b	SR18_H1.C10	SR19_H1.C11	SR1_H1.C1a	SR20_H1.C12	SR21_H1.C13	SR22_H1.C14	SR23_H1.C15a	SR24_H1.C15b	SR25_H1.C16	SR26_H2.C1	SR27_H3.C1a	SR28_H3.C1b	SR29_H3.C1c	SR2_H1.C1b	SR30_H3.C1d	SR31_H3.C2a	SR32_H3.C2b	SR33_H3.C3a	SR34_H3.C3b	SR35_H3.C3c	SR36_H3.C4	SR37_H3.C5	SR38_H3.C6a	SR39_H3.C6b	SR3_H1.C2	SR40_H3.C7a	SR41_H3.C7b	SR42_H3.C8a
group_36		hypothetical protein	3	3	1	66	1	66	1	Investigate	551	551	551							SR16_H1.C9a_00450																							SR37_H3.C5_00617
deoB_2		Phosphopentomutase	3	3	1						233	902	679
panC_2		pantoate--beta-alanine ligase	3	3	1	67	1	65	1	Investigate	362	788	504							SR16_H1.C9a_02194
cas10_1		type III-A CRISPR-associated protein Cas10/Csm1	2	2	1	72	4	72	6		212	212	212
pepF_1		oligoendopeptidase F	2	2	1						368	368	368
group_152		class I SAM-dependent methyltransferase	2	2	1	63	1	51	1	Investigate	242	242	242
group_190		ABC transporter ATP-binding protein	2	2	1	59	1	49	1	Investigate	275	275	275
group_194		hypothetical protein	2	2	1	69	3	69	1		245	245	245
group_211		YfhO family protein	2	2	1	47	1	64	1	Investigate	974	974	974
group_226		ABC transporter ATP-binding protein/permease	2	2	1	51	1	47	1	Investigate	560	560	560
group_231		MFS transporter	2	2	1	53	1	59	1	Investigate	398	398	398
group_240		aminoacyltransferase	2	2	1	62	2	58	2	Investigate	425	425	425
group_246		alpha/beta hydrolase	2	2	1	72	7	72	4		485	485	485
secA2_2		accessory Sec system translocase SecA2	2	2	1						317	317	317
group_297		bifunctional metallophosphatase/5'-nucleotidase	2	2	1	56	2	52	1	Investigate	239	1520	879																		SR26_H2.C1_02174
cas9_2		type II CRISPR RNA-guided endonuclease Cas9	2	2	1						2588	2588	2588
group_402		N-acetylmuramoyl-L-alanine amidase	2	2	1	58	1	48	1	Investigate	884	884	884
group_478		hypothetical protein	2	2	1	72	3	72	3		1175	1457	1316
group_54		MucBP domain-containing protein	2	2	1	57	1	61	1	Investigate	4253	4253	4253
group_806		hypothetical protein	2	2	1	64	2	55	1	Investigate	143	143	143
group_807		hypothetical protein	2	2	1	64	1	55	2	Investigate	146	146	146
group_852		hypothetical protein	2	2	1	52	1	62	1	Investigate	695	695	695
group_853		phosphopentomutase	2	2	1	72	5	72	7		269	269	269
group_854		hypothetical protein	2	2	1	72	2	72	2		1544	1544	1544
group_856		hypothetical protein	2	2	1	48	1	54	1	Investigate	1268	1268	1268
group_857		hypothetical protein	2	2	1	55	1	57	1	Investigate	254	254	254
group_866		hypothetical protein	2	2	1	69	2	69	3		782	782	782
group_868		hypothetical protein	2	2	1	70	1	70	4		341	341	341
group_869		hypothetical protein	2	2	1	70	2	70	3		515	515	515
group_870		hypothetical protein	2	2	1	70	3	70	2		137	137	137
group_871		hypothetical protein	2	2	1	70	4	70	1		407	407	407
group_95		glycosyltransferase family 2 protein	2	2	1	49	1	60	1	Investigate	752	752	752
group_973		hypothetical protein	2	2	1	61	1	53	1	Investigate	1388	1394	1391																		SR26_H2.C1_00504
group_98		hypothetical protein	2	2	1	67	2	65	2	Investigate	125	125	125
aadK		Aminoglycoside 6-adenylyltransferase	1	1	1	68	2	68	2		848	848	848
abc-f_4		ABC-F type ribosomal protection protein	1	1	1	19	1	30	1	Investigate	317	317	317
deoC		deoxyribose-phosphate aldolase	1	1	1	1	1	14	1	Investigate	281	281	281
dgcC		putative diguanylate cyclase DgcC	1	1	1	24	1	20	1	Investigate	227	227	227							SR16_H1.C9a_02216
gmpC_1		dipeptide ABC transporter glycylmethionine-binding lipoprotein	1	1	1	46	1	23	2	Investigate	116	116	116																		SR26_H2.C1_01249
group_116		hypothetical protein	1	1	1	71	4	71	7		347	347	347
group_117		hypothetical protein	1	1	1	71	5	71	6		404	404	404
group_13		hypothetical protein	1	1	1	15	1	8	1	Investigate	1838	1838	1838															SR23_H1.C15a_01880
group_140		Y-family DNA polymerase	1	1	1	66	2	66	2	Investigate	419	419	419							SR16_H1.C9a_00381
group_147		TSUP family transporter	1	1	1	45	1	16	1	Investigate	353	353	353																													SR36_H3.C4_00523
group_155		phosphate--AMP phosphotransferase	1	1	1	32	1	40	1	Investigate	275	275	275																SR24_H1.C15b_01717
group_161		amino acid ABC transporter permease	1	1	1	9	1	19	1	Investigate	263	263	263																		SR26_H2.C1_01554
group_163		sucrose-specific PTS transporter subunit IIBC	1	1	1	6	1	12	1	Investigate	236	236	236
group_171		HTH domain-containing protein	1	1	1	37	1	24	1	Investigate	233	233	233																SR24_H1.C15b_00666
group_178		DEAD/DEAH box helicase family protein	1	1	1	43	1	42	1	Investigate	1754	1754	1754																		SR26_H2.C1_00793
group_185		nucleotidyltransferase	1	1	1	26	1	36	1	Investigate	104	104	104		SR11_H1.C6b_00913
group_220		aldehyde dehydrogenase	1	1	1	28	1	25	1	Investigate	605	605	605
group_228		NAD(P)/FAD-dependent oxidoreductase	1	1	1	13	1	29	1	Investigate	446	446	446																		SR26_H2.C1_00591
group_235		PH domain-containing protein	1	1	1	25	2	38	1	Investigate	296	296	296
group_237		PH domain-containing protein	1	1	1	25	1	38	2	Investigate	470	470	470
group_255		terminase large subunit	1	1	1	29	1	34	1	Investigate	821	821	821
group_276		putative DNA binding domain-containing protein	1	1	1	34	1	13	1	Investigate	758	758	758							SR16_H1.C9a_01958
group_277		putative DNA binding domain-containing protein	1	1	1	3	1	31	1	Investigate	758	758	758
group_283		AAA family ATPase	1	1	1	10	1	37	1	Investigate	1949	1949	1949	SR10_H1.C6a_02073
group_285		hypothetical protein	1	1	1	35	1	4	1	Investigate	161	161	161							SR16_H1.C9a_02187
group_295		serine protease	1	1	1	56	1	52	2	Investigate	389	389	389																		SR26_H2.C1_02176
group_301		hypothetical protein	1	1	1	31	1	28	1	Investigate	125	125	125
group_310		hypothetical protein	1	1	1	20	1	1	1	Investigate	1619	1619	1619																		SR26_H2.C1_01941
group_47		phage tail tape measure protein	1	1	1	60	3	56	2		1034	1034	1034
group_608		hypothetical protein	1	1	1	7	1	44	1	Investigate	116	116	116							SR16_H1.C9a_02212
deoB_1		Phosphopentomutase	1	1	1						923	923	923
group_610		protein rep	1	1	1	17	1	3	1	Investigate	200	200	200							SR16_H1.C9a_02219
group_64		hypothetical protein	1	1	1	14	1	33	1	Investigate	137	137	137														SR22_H1.C14_00512
group_66		hypothetical protein	1	1	1	30	1	46	1	Investigate	224	224	224
group_670		hypothetical protein	1	1	1	46	2	23	1	Investigate	1025	1025	1025																		SR26_H2.C1_01197
group_741		hypothetical protein	1	1	1	38	1	10	1	Investigate	593	593	593																												SR35_H3.C3c_02099
group_749		hypothetical protein	1	1	1	12	1	9	1	Investigate	206	206	206																														SR37_H3.C5_02311
group_759		hypothetical protein	1	1	1	68	1	68	1		383	383	383
group_762		hypothetical protein	1	1	1	68	4	68	5		116	116	116
group_763		hypothetical protein	1	1	1	68	5	68	4		455	455	455
group_764		hypothetical protein	1	1	1	60	1	56	3		929	929	929
group_766		hypothetical protein	1	1	1	60	2	56	1		215	215	215
group_767		hypothetical protein	1	1	1	23	1	17	1	Investigate	1358	1358	1358
group_768		XRE family transcriptional regulator	1	1	1	65	3	67	4		629	629	629
group_769		helix-turn-helix transcriptional regulator	1	1	1	65	4	67	3		227	227	227
group_770		hypothetical protein	1	1	1	65	2	67	2		218	218	218
group_771		hypothetical protein	1	1	1	65	1	67	1		332	332	332
group_773		HK97 gp10 family phage protein	1	1	1	16	1	35	1	Investigate	413	413	413
group_774		hypothetical protein	1	1	1	71	1	71	1		296	296	296
group_775		helix-turn-helix domain-containing protein	1	1	1	71	2	71	2		716	716	716
group_776		helix-turn-helix domain-containing protein	1	1	1	71	3	71	8		269	269	269
group_777		hypothetical protein	1	1	1	71	6	71	5		137	137	137
group_780		hypothetical protein	1	1	1	71	7	71	4		215	215	215
group_781		hypothetical protein	1	1	1	71	8	71	3		320	320	320
group_8		MSCRAMM family adhesin	1	1	1	21	1	6	1	Investigate	2186	2186	2186																						SR2_H1.C1b_02201
group_80		hypothetical protein	1	1	1	27	1	15	1	Investigate	650	650	650
group_808		hypothetical protein	1	1	1	39	1	43	1	Investigate	110	110	110
group_82		FUSC family protein	1	1	1	5	1	22	1	Investigate	986	986	986																		SR26_H2.C1_01770
group_847		hypothetical protein	1	1	1	41	1	39	1	Investigate	125	125	125
group_848		hypothetical protein	1	1	1	33	1	41	1	Investigate	137	137	137
group_849		hypothetical protein	1	1	1	42	1	27	1	Investigate	170	170	170
group_851		2-dehydropantoate 2-reductase	1	1	1	40	1	32	1	Investigate	518	518	518
group_855		hypothetical protein	1	1	1	72	1	72	1		1196	1196	1196
group_858		hypothetical protein	1	1	1	11	1	21	1	Investigate	161	161	161
group_860		hypothetical protein	1	1	1	4	1	45	1	Investigate	89	89	89
group_867		hypothetical protein	1	1	1	44	1	7	1	Investigate	1004	1004	1004
group_872		hypothetical protein	1	1	1	62	1	58	1	Investigate	287	287	287
group_873		hypothetical protein	1	1	1	2	1	26	1	Investigate	1109	1109	1109
group_88		BglG family transcription antiterminator	1	1	1	8	1	18	1	Investigate	539	539	539							SR16_H1.C9a_01946
abc-f_3		ABC-F type ribosomal protection protein	1	1	1						317	317	317
nifS		Cysteine desulfurase NifS	1	1	1	36	1	2	1	Investigate	236	236	236																													SR36_H3.C4_02309
repD		Replication initiation protein	1	1	1	2	2	26	2	Investigate	944	944	944
repN		Replication initiation protein	1	1	1	68	3	68	3		944	944	944
[truncated: 44 more columns]

## Sheet: Table S3f
Table S3f: Genes unique for pure culture S. rostri isolates (n=24). The isolates are marked in color:
Gene	Non-unique Gene name	Annotation	No. isolates	No. sequences	Avg sequences per isolate	Genome Fragment	Order within Fragment	Accessory Fragment	Accessory Order with Fragment	QC	Min group size nuc	Max group size nuc	Avg group size nuc	SR10_H1C6a	SR11_H1C6b	SR12_H1C7a	SR13_H1C7b	SR14_H1C7c	SR15_H1C8	SR16_H1C9a	SR17_H1C9b	SR18_H1C10	SR19_H1C11	SR1_H1C1a	SR20_H1C12	SR21_H1C13	SR22_H1C14	SR23_H1C15a	SR24_H1C15b	SR25_H1C16	SR26_H2C1	SR27_H3C1a	SR28_H3C1b	SR29_H3C1c	SR2_H1C1b	SR30_H3C1d	SR31_H3C2a	SR32_H3C2b	SR33_H3C3a	SR34_H3C3b	SR35_H3C3c	SR36_H3C4	SR37_H3C5	SR38_H3C6a	SR39_H3C6b	SR3_H1C2	SR40_H3C7a	SR41_H3C7b	SR42_H3C8a
group_321		hypothetical protein	4	4	1	40	1	40	1		467	998	795																																		NDPCDPJB_02278
deoB		Phosphopentomutase	3	3	1	36	1	35	1	Investigate	611	611	611																																		NDPCDPJB_02290		FCONKICK_02355
group_785		hypothetical protein	3	3	1	39	2	39	3		101	101	101
group_788		hypothetical protein	3	3	1	42	4	42	3		350	350	350
group_789		hypothetical protein	3	3	1	42	3	42	4		149	149	149
group_790		hypothetical protein	3	3	1	42	2	42	6		914	914	914
group_791		hypothetical protein	3	3	1	42	1	42	5		584	584	584
group_795		hypothetical protein	3	3	1	34	1	37	1	Investigate	146	146	146
acp_2		Sodium/proton-dependent alanine carrier protein	2	2	1	31	1	33	1	Investigate	680	680	680
group_116		hypothetical protein	2	2	1	27	1	28	1	Investigate	278	278	278																																		NDPCDPJB_02042		FCONKICK_02097
group_152		hypothetical protein	2	2	1	39	3	39	2		257	257	257
group_476		hypothetical protein	2	2	1	30	1	26	1	Investigate	383	707	545
group_784		hypothetical protein	2	2	1	39	4	39	1		296	296	296
group_786		hypothetical protein	2	2	1	28	1	27	1	Investigate	1016	1016	1016
group_787		hypothetical protein	2	2	1	28	2	27	2	Investigate	596	596	596
group_794		hypothetical protein	2	2	1	33	1	30	1	Investigate	1358	1358	1358
group_807		hypothetical protein	2	2	1	40	2	40	2		143	143	143
group_808		hypothetical protein	2	2	1	40	3	40	3		146	146	146
linA		Lincosamide resistance protein	2	2	1	29	2	29	2		485	485	485
spsB_3		Signal peptidase IB	2	2	1	32	1	32	1	Investigate	164	164	164
tagE		Poly(glycerol-phosphate) alpha-glucosyltransferase	2	2	1	26	1	31	1	Investigate	395	395	395
aadK		Aminoglycoside 6-adenylyltransferase	1	1	1	38	2	38	2		848	848	848
dut_1		Deoxyuridine 5'-triphosphate nucleotidohydrolase	1	1	1	44	12	44	2		515	515	515
gabD		Succinate-semialdehyde dehydrogenase [NADP(+)] GabD	1	1	1	12	1	25	1	Investigate	305	305	305									EDEAHILB_02220
group_117		hypothetical protein	1	1	1	18	1	19	1	Investigate	278	278	278
group_121		hypothetical protein	1	1	1	43	14	43	9		749	749	749
group_123		hypothetical protein	1	1	1	44	19	44	17		302	302	302
group_124		hypothetical protein	1	1	1	44	17	44	19		986	986	986
group_126		hypothetical protein	1	1	1	44	4	44	6		275	275	275
group_127		hypothetical protein	1	1	1	44	3	44	5		344	344	344
group_128		hypothetical protein	1	1	1	44	2	44	4		3230	3230	3230
cadA_2		Cadmium-transporting ATPase	1	1	1						809	809	809
group_158		hypothetical protein	1	1	1	10	1	14	1	Investigate	275	275	275																NHMBFMFC_01717
group_174		hypothetical protein	1	1	1	17	1	16	1	Investigate	233	233	233																NHMBFMFC_00666
group_292		hypothetical protein	1	1	1	13	1	24	1	Investigate	497	497	497
group_31		hypothetical protein	1	1	1	44	6	44	8		425	425	425
asp1_2		Accessory Sec system protein Asp1	1	1	1						1319	1319	1319
group_484		hypothetical protein	1	1	1	44	7	44	9		413	413	413
group_612		hypothetical protein	1	1	1	2	1	13	1	Investigate	608	608	608									EDEAHILB_02207
group_613		hypothetical protein	1	1	1	21	1	23	1	Investigate	452	452	452									EDEAHILB_02215
group_617		hypothetical protein	1	1	1	7	1	3	1	Investigate	107	107	107									EDEAHILB_02226
group_618		hypothetical protein	1	1	1	24	1	9	1	Investigate	206	206	206									EDEAHILB_02230
group_619		hypothetical protein	1	1	1	15	1	17	1	Investigate	1832	1832	1832										AFOHJDFD_01922
group_756		hypothetical protein	1	1	1	9	1	22	1	Investigate	164	164	164
group_759		hypothetical protein	1	1	1	38	1	38	1		383	383	383
group_762		hypothetical protein	1	1	1	38	4	38	4		116	116	116
group_763		hypothetical protein	1	1	1	38	3	38	3		455	455	455
group_809		hypothetical protein	1	1	1	6	1	4	1	Investigate	110	110	110
group_810		hypothetical protein	1	1	1	37	4	34	3		887	887	887
group_811		hypothetical protein	1	1	1	37	3	34	4		1217	1217	1217
group_812		hypothetical protein	1	1	1	37	2	34	2		476	476	476
group_813		hypothetical protein	1	1	1	37	1	34	1		242	242	242
group_814		hypothetical protein	1	1	1	29	1	29	1		845	845	845
group_816		hypothetical protein	1	1	1	3	1	2	1	Investigate	569	569	569
group_844		hypothetical protein	1	1	1	25	1	7	1	Investigate	230	230	230
group_845		hypothetical protein	1	1	1	5	1	8	1	Investigate	128	128	128
group_846		hypothetical protein	1	1	1	4	1	18	1	Investigate	185	185	185
group_847		hypothetical protein	1	1	1	22	1	12	1	Investigate	188	188	188
group_849		hypothetical protein	1	1	1	8	1	10	1	Investigate	137	137	137
group_852		hypothetical protein	1	1	1	16	1	11	1	Investigate	518	518	518
group_868		hypothetical protein	1	1	1	29	3	29	3	Hypothetical protein with no hits to refseq/uniprot/clusters/cdd/tigrfams/pfam overlapping another protein with hits	1004	1004	1004
group_877		hypothetical protein	1	1	1	1	1	15	2	Investigate	968	968	968
group_878		hypothetical protein	1	1	1	20	1	5	1	Investigate	1370	1370	1370
group_879		hypothetical protein	1	1	1	14	1	21	2	Investigate	194	194	194
group_880		hypothetical protein	1	1	1	41	5	41	1		209	209	209
group_881		hypothetical protein	1	1	1	41	6	41	2		173	173	173
group_882		hypothetical protein	1	1	1	41	7	41	3		275	275	275
group_883		hypothetical protein	1	1	1	41	8	41	4		278	278	278
group_884		hypothetical protein	1	1	1	41	9	41	10		1949	1949	1949
group_885		hypothetical protein	1	1	1	41	10	41	9		206	206	206
group_886		hypothetical protein	1	1	1	41	4	41	8		743	743	743
group_887		hypothetical protein	1	1	1	41	3	41	7		590	590	590
ssbA_2		Single-stranded DNA-binding protein A	1	1	1						485	485	485
group_889		hypothetical protein	1	1	1	41	1	41	5		788	788	788
group_890		hypothetical protein	1	1	1	11	1	20	1	Investigate	179	179	179
group_891		hypothetical protein	1	1	1	43	8	43	15		1946	1946	1946
group_892		hypothetical protein	1	1	1	43	9	43	14		284	284	284
group_893		hypothetical protein	1	1	1	43	10	43	13		272	272	272
group_894		hypothetical protein	1	1	1	43	11	43	12		179	179	179
group_895		hypothetical protein	1	1	1	43	12	43	11		209	209	209
group_896		hypothetical protein	1	1	1	43	13	43	10		92	92	92
group_897		hypothetical protein	1	1	1	43	15	43	8		221	221	221
group_898		hypothetical protein	1	1	1	43	7	43	7		191	191	191
group_899		hypothetical protein	1	1	1	43	6	43	6		773	773	773
group_900		hypothetical protein	1	1	1	43	5	43	5		209	209	209
group_901		hypothetical protein	1	1	1	43	4	43	4		329	329	329
group_902		hypothetical protein	1	1	1	43	3	43	3		473	473	473
group_903		hypothetical protein	1	1	1	43	2	43	2		791	791	791
group_905		hypothetical protein	1	1	1	44	11	44	1		332	332	332
group_906		hypothetical protein	1	1	1	44	13	44	23		173	173	173
group_907		hypothetical protein	1	1	1	44	14	44	22		179	179	179
group_908		hypothetical protein	1	1	1	44	15	44	21		401	401	401
group_909		hypothetical protein	1	1	1	44	16	44	20		494	494	494
group_910		hypothetical protein	1	1	1	44	18	44	18		587	587	587
group_911		hypothetical protein	1	1	1	44	20	44	16		1418	1418	1418
group_912		NAD(+)--arginine ADP-ribosyltransferase EFV	1	1	1	44	21	44	15		944	944	944
group_913		hypothetical protein	1	1	1	44	22	44	14		599	599	599
group_914		hypothetical protein	1	1	1	44	23	44	13		815	815	815
group_915		hypothetical protein	1	1	1	44	10	44	12		281	281	281
group_916		hypothetical protein	1	1	1	44	9	44	11		296	296	296
group_917		hypothetical protein	1	1	1	44	8	44	10		335	335	335
group_918		hypothetical protein	1	1	1	44	5	44	7		494	494	494
group_919		hypothetical protein	1	1	1	44	1	44	3		917	917	917
group_920		hypothetical protein	1	1	1	42	5	42	1		566	566	566
group_921		hypothetical protein	1	1	1	42	6	42	2		335	335	335
group_922		hypothetical protein	1	1	1	35	1	36	1		818	818	818
group_923		hypothetical protein	1	1	1	35	4	36	2		281	281	281
group_924		hypothetical protein	1	1	1	35	3	36	3		482	482	482
group_925		hypothetical protein	1	1	1	35	2	36	4		551	551	551
group_97		putative ABC transporter ATP-binding protein	1	1	1	19	1	1	1	Investigate	317	317	317
lacE_1		PTS system lactose-specific EIICB component	1	1	1	14	2	21	1	Investigate	797	797	797
repN		Replication initiation protein	1	1	1	38	5	38	5		944	944	944
rpoB_2		DNA-directed RNA polymerase subunit beta	1	1	1	23	1	6	1	Investigate	206	206	206									EDEAHILB_02225
xerC_4		Tyrosine recombinase XerC	1	1	1	43	1	43	1		1049	1049	1049
[truncated: 45 more columns]

## Sheet: Table S3g
Table S3g: Genes unique for mixed culture S. rostri isolates (n=57). The isolates are marked in color:
Gene	Non-unique Gene name	Annotation	No. isolates	No. sequences	Avg sequences per isolate	Genome Fragment	Order within Fragment	Accessory Fragment	Accessory Order with Fragment	QC	Min group size nuc	Max group size nuc	Avg group size nuc	SR10_H1C6a	SR11_H1C6b	SR12_H1C7a	SR13_H1C7b	SR14_H1C7c	SR15_H1C8	SR16_H1C9a	SR17_H1C9b	SR18_H1C10	SR19_H1C11	SR1_H1C1a	SR20_H1C12	SR21_H1C13	SR22_H1C14	SR23_H1C15a	SR24_H1C15b	SR25_H1C16	SR26_H2C1	SR27_H3C1a	SR28_H3C1b	SR29_H3C1c	SR2_H1C1b	SR30_H3C1d	SR31_H3C2a	SR32_H3C2b	SR33_H3C3a	SR34_H3C3b	SR35_H3C3c	SR36_H3C4	SR37_H3C5	SR38_H3C6a	SR39_H3C6b	SR3_H1C2	SR40_H3C7a	SR41_H3C7b	SR42_H3C8a
group_741		hypothetical protein	8	8	1	71	1	71	1	Investigate	188	188	188																								BBGHILMI_00777								KHOFKLIK_00775
group_19		hypothetical protein	4	4	1	70	1	69	1	Investigate	1457	1457	1457				PLKPPOBK_02114													GOLKPCHP_02149
group_58		hypothetical protein	4	4	1	69	1	70	1	Investigate	158	158	158																				AMNDPIBK_02284			CJKMBCIL_02279				AAHIBLGN_02281
group_21		hypothetical protein	3	3	1	67	2	68	1	Investigate	1457	2723	1879																				AMNDPIBK_02167
group_37		hypothetical protein	3	3	1	68	2	66	2	Investigate	551	551	551							AEMJHAFI_00450																							LCMDHMFN_00617
group_11		hypothetical protein	2	2	1	62	1	65	1	Investigate	1838	1838	1838	PIABIFAJ_01835				JOJEGDGL_01838
group_12		hypothetical protein	2	2	1	65	1	61	1	Investigate	1838	1838	1838			FFIHCCFO_01836									PJOACPKE_01837
group_279		hypothetical protein	2	2	1	60	1	64	1	Investigate	758	758	758												PJOACPKE_01956
yfkN		Trifunctional nucleotide phosphoesterase protein YfkN	2	2	1						239	1520	879																		ILLNCKDM_02174
group_56		hypothetical protein	2	2	1	64	1	62	1	Investigate	158	158	158																					DCCDNKDM_02283
group_62		hypothetical protein	2	2	1	58	1	63	1	Investigate	2579	2813	2696																		ILLNCKDM_02208
group_80		hypothetical protein	2	2	1	63	1	58	1	Investigate	1223	1223	1223			FFIHCCFO_01195		JOJEGDGL_01058
aldH1_2		4,4'-diaponeurosporen-aldehyde dehydrogenase	1	1	1	27	1	36	1	Investigate	605	605	605
deoC1		Deoxyribose-phosphate aldolase 1	1	1	1	41	1	53	1	Investigate	281	281	281
dgcC		putative diguanylate cyclase DgcC	1	1	1	34	1	7	1	Investigate	227	227	227							AEMJHAFI_02216
gabR_1		HTH-type transcriptional regulatory protein GabR	1	1	1	51	1	23	1	Investigate	635	635	635					JOJEGDGL_01155
glcT_2		GlcA/glcB genes antiterminator	1	1	1	22	1	28	1	Investigate	287	287	287				PLKPPOBK_00142
group_10		hypothetical protein	1	1	1	32	1	25	1	Investigate	1838	1838	1838															PJGKKCFK_01880
group_120		hypothetical protein	1	1	1	17	1	1	1	Investigate	404	404	404
dinB_2		DNA polymerase IV	1	1	1						419	419	419							AEMJHAFI_00381
group_150		hypothetical protein	1	1	1	25	1	56	1	Investigate	353	353	353																													AACPNDDD_00522
treP_2		PTS system trehalose-specific EIIBC component	1	1	1						236	236	236
group_18		hypothetical protein	1	1	1	40	1	51	1	Investigate	1457	1457	1457													DEOFJHHG_02113
group_181		hypothetical protein	1	1	1	2	1	38	1	Investigate	1754	1754	1754																		ILLNCKDM_00793
gabR_1		HTH-type transcriptional regulatory protein GabR	1	1	1	51	1	23	1	Investigate	635	635	635			FFIHCCFO_01267
group_231		hypothetical protein	1	1	1	50	1	17	1	Investigate	446	446	446																		ILLNCKDM_00591
group_238		hypothetical protein	1	1	1	7	1	24	1	Investigate	296	296	296
group_255		hypothetical protein	1	1	1	43	2	54	1	Investigate	392	392	392
group_268		hypothetical protein	1	1	1	10	2	40	1	Investigate	116	116	116																		ILLNCKDM_01249
group_285		hypothetical protein	1	1	1	39	1	16	1	Investigate	1949	1949	1949	PIABIFAJ_02073
group_287		hypothetical protein	1	1	1	37	1	57	1	Investigate	161	161	161							AEMJHAFI_02187
group_291		hypothetical protein	1	1	1	45	1	12	1	Investigate	497	497	497
group_294		hypothetical protein	1	1	1	67	1	68	2	Investigate	497	497	497																				AMNDPIBK_02168
group_297		Serine protease HtrA-like protein	1	1	1	59	1	60	1	Investigate	389	389	389																		ILLNCKDM_02176
group_303		hypothetical protein	1	1	1	38	1	45	1	Investigate	125	125	125
group_304		hypothetical protein	1	1	1	46	1	32	1	Investigate	125	125	125
group_305		hypothetical protein	1	1	1	42	1	22	1	Investigate	125	125	125												PJOACPKE_02229
group_312		hypothetical protein	1	1	1	52	1	19	1	Investigate	1619	1619	1619																		ILLNCKDM_01941
group_407		hypothetical protein	1	1	1	43	1	54	2	Investigate	584	584	584
group_48		hypothetical protein	1	1	1	61	3	59	3		1034	1034	1034
group_49		hypothetical protein	1	1	1	18	1	6	1	Investigate	1526	1526	1526
group_610		hypothetical protein	1	1	1	5	1	4	1	Investigate	116	116	116							AEMJHAFI_02212
group_620		hypothetical protein	1	1	1	44	1	48	1	Investigate	548	548	548												PJOACPKE_02220
group_621		hypothetical protein	1	1	1	44	2	48	2	Investigate	164	164	164												PJOACPKE_02221
deoB_1		Phosphopentomutase	1	1	1						923	923	923
group_67		hypothetical protein	1	1	1	35	1	42	1	Investigate	137	137	137														GGAFJLBN_00512
group_671		hypothetical protein	1	1	1	10	1	40	2	Investigate	1025	1025	1025																		ILLNCKDM_01197
group_69		hypothetical protein	1	1	1	53	1	50	1	Investigate	224	224	224
group_743		hypothetical protein	1	1	1	13	1	21	1	Investigate	593	593	593																												MEDKDFCD_02099
group_751		hypothetical protein	1	1	1	16	1	20	1	Investigate	206	206	206																														LCMDHMFN_02311
group_752		hypothetical protein	1	1	1	20	1	49	1	Investigate	200	200	200																															KCNJADCF_02309
group_755		hypothetical protein	1	1	1	29	1	47	1	Investigate	602	602	602
group_757		hypothetical protein	1	1	1	55	1	29	1	Investigate	416	416	416
group_758		hypothetical protein	1	1	1	12	1	55	1	Investigate	404	404	404
group_764		hypothetical protein	1	1	1	61	1	59	2		929	929	929
group_766		hypothetical protein	1	1	1	61	2	59	1		215	215	215
group_767		hypothetical protein	1	1	1	33	1	30	1	Investigate	1358	1358	1358
lexA_2		LexA repressor	1	1	1						629	629	629
group_769		hypothetical protein	1	1	1	66	4	67	3		227	227	227
group_770		hypothetical protein	1	1	1	66	2	67	4		218	218	218
group_771		hypothetical protein	1	1	1	66	1	67	1		332	332	332
group_773		hypothetical protein	1	1	1	8	1	11	1	Investigate	413	413	413
sdrC		Serine-aspartate repeat-containing protein C	1	1	1						2186	2186	2186																						JDMMIIPE_02202
group_84		hypothetical protein	1	1	1	54	1	10	1	Investigate	650	650	650
group_848		hypothetical protein	1	1	1	9	1	5	1	Investigate	125	125	125
group_850		hypothetical protein	1	1	1	36	1	43	1	Investigate	170	170	170
group_851		hypothetical protein	1	1	1	1	1	9	1	Investigate	212	212	212
group_856		hypothetical protein	1	1	1	49	1	27	1	Investigate	1196	1196	1196
group_859		hypothetical protein	1	1	1	6	1	37	1	Investigate	161	161	161
group_86		hypothetical protein	1	1	1	47	1	34	1	Investigate	986	986	986																		ILLNCKDM_01770
group_861		hypothetical protein	1	1	1	21	1	3	1	Investigate	89	89	89
group_865		hypothetical protein	1	1	1	30	1	18	1	Investigate	158	158	158
group_866		hypothetical protein	1	1	1	28	1	15	1	Investigate	476	476	476
group_873		hypothetical protein	1	1	1	4	1	14	1	Investigate	287	287	287
group_874		hypothetical protein	1	1	1	48	1	8	1	Investigate	1109	1109	1109
group_876		hypothetical protein	1	1	1	31	1	13	1	Investigate	206	206	206
group_92		hypothetical protein	1	1	1	11	1	39	1	Investigate	539	539	539							AEMJHAFI_01946
group_96		putative ABC transporter ATP-binding protein	1	1	1	19	1	52	1	Investigate	317	317	317
nifS_2		Cysteine desulfurase NifS	1	1	1	3	1	46	1	Investigate	236	236	236																													AACPNDDD_02307
pepP		Xaa-Pro aminopeptidase	1	1	1	26	1	41	1	Investigate	191	191	191												PJOACPKE_02226
repD		Replication initiation protein	1	1	1	48	2	8	2	Investigate	944	944	944
tmcAL_1		tRNA(Met) cytidine acetate ligase	1	1	1	24	1	35	1	Investigate	104	104	104		NGMFAEIO_00913
yxeN		putative amino-acid permease protein YxeN	1	1	1	14	1	26	1	Investigate	263	263	263																		ILLNCKDM_01554
[truncated: 45 more columns]

## Sheet: Table S3h
Table S3h: Genes unique for S. rostri test isolates (n=81). The isolates are marked in color:
Gene	Non-unique Gene name	Annotation	No. isolates	No. sequences	Avg sequences per isolate	Genome Fragment	Order within Fragment	Accessory Fragment	Accessory Order with Fragment	QC	Min group size nuc	Max group size nuc	Avg group size nuc	SR10_H1C6a	SR11_H1C6b	SR12_H1C7a	SR13_H1C7b	SR14_H1C7c	SR15_H1C8	SR16_H1C9a	SR17_H1C9b	SR18_H1C10	SR19_H1C11	SR1_H1C1a	SR20_H1C12	SR21_H1C13	SR22_H1C14	SR23_H1C15a	SR24_H1C15b	SR25_H1C16	SR26_H2C1	SR27_H3C1a	SR28_H3C1b	SR29_H3C1c	SR2_H1C1b	SR30_H3C1d	SR31_H3C2a	SR32_H3C2b	SR33_H3C3a	SR34_H3C3b	SR35_H3C3c	SR36_H3C4	SR37_H3C5	SR38_H3C6a	SR39_H3C6b	SR3_H1C2	SR40_H3C7a	SR41_H3C7b	SR42_H3C8a
asp1_1		Accessory Sec system protein Asp1	14	14	1						245	1562	1467
group_780		hypothetical protein	14	14	1	121	3	121	4		413	413	413
group_782		hypothetical protein	14	14	1	121	5	121	1		182	185	184
group_62		hypothetical protein	13	13	1	115	1	115	1	Investigate	182	182	182
group_783		hypothetical protein	13	13	1	120	4	120	5		551	551	551
group_90		hypothetical protein	13	13	1	116	1	116	1	Investigate	866	899	893
acuI		putative acrylyl-CoA reductase AcuI	12	12	1	124	8	124	4		971	971	971
group_786		hypothetical protein	12	12	1	124	2	124	10		446	446	446
group_789		3-hexulose-6-phosphate synthase	12	12	1	124	12	124	8		632	632	632
group_791		hypothetical protein	12	12	1	124	10	124	6		524	524	524
group_792		putative oxidoreductase	12	12	1	124	9	124	5		737	737	737
group_796		hypothetical protein	12	12	1	124	5	124	1		437	437	437
group_797		hypothetical protein	12	12	1	123	8	123	1		1826	1826	1826
group_798		hypothetical protein	12	12	1	123	9	123	9		713	713	713
group_799		hypothetical protein	12	12	1	123	7	123	8		194	194	194
group_800		hypothetical protein	12	12	1	123	6	123	7		134	134	134
group_802		hypothetical protein	12	12	1	123	4	123	5		548	548	548
group_803		hypothetical protein	12	12	1	123	3	123	4		1493	1493	1493
group_804		hypothetical protein	12	12	1	123	2	123	3		221	221	221
group_805		hypothetical protein	12	12	1	123	1	123	2		149	149	149
group_806		IS6 family transposase IS431R	12	12	1	114	1	114	1	Investigate	674	674	674
hadL		(S)-2-haloacid dehalogenase	12	12	1	124	6	124	2		668	668	668
hxlB_2		3-hexulose-6-phosphate isomerase	12	12	1	124	11	124	7		551	551	551
hxlR		HTH-type transcriptional activator HxlR	12	12	1	124	4	124	12		344	344	344
nhaX		Stress response protein NhaX	12	12	1	124	3	124	11		188	188	188
ntcA		Global nitrogen regulator	12	12	1	124	1	124	9		617	617	617
ohrR		Organic hydroperoxide resistance transcriptional regulator	12	12	1	124	7	124	3		419	419	419
xerD_2		Tyrosine recombinase XerD	12	12	1	123	5	123	6		950	950	950
group_16		hypothetical protein	11	11	1	120	2	120	4		398	398	398
group_781		hypothetical protein	11	11	1	121	4	121	2		92	92	92
deoB		Phosphopentomutase	6	6	1	118	8	118	3		233	902	645																																		NDPCDPJB_02290		FCONKICK_02355
group_612		hypothetical protein	6	6	1	119	6	119	5		401	401	401																NHMBFMFC_02002	GOLKPCHP_02001												AACPNDDD_01967							FCONKICK_02008
group_452		hypothetical protein	5	5	1	119	3	119	3		1364	1490	1464																													AACPNDDD_02005							FCONKICK_02046
group_617		hypothetical protein	5	5	1	110	2	111	2		215	215	215																		ILLNCKDM_00692																NDPCDPJB_02282		FCONKICK_02338
group_825		hypothetical protein	5	5	1	109	1	109	1	Investigate	3986	3986	3986
group_279		hypothetical protein	4	4	1	107	1	106	1	Investigate	497	497	497																											AAHIBLGN_02179								MLADDNCM_02181
group_313		hypothetical protein	4	4	1	113	5	112	3		467	998	795																																		NDPCDPJB_02278
group_705		hypothetical protein	4	4	1	119	4	119	4		503	503	503																													AACPNDDD_02004							FCONKICK_02045
group_706		hypothetical protein	4	4	1	119	2	119	2		569	569	569																													AACPNDDD_02006							FCONKICK_02047
group_707		hypothetical protein	4	4	1	119	1	119	1		896	896	896																													AACPNDDD_02007							FCONKICK_02048
group_708		hypothetical protein	4	4	1	113	4	112	2		335	335	335																													AACPNDDD_02296					NDPCDPJB_02276
group_709		hypothetical protein	4	4	1	113	1	112	1		182	182	182																													AACPNDDD_02297					NDPCDPJB_02277
comFA_2		ComF operon protein 1	3	3	1	104	2	102	2	Investigate	365	365	365												PJOACPKE_01816			PJGKKCFK_01859
group_19		hypothetical protein	3	3	1	102	1	104	1	Investigate	1457	2723	1879																				AMNDPIBK_02167
group_35		hypothetical protein	3	3	1	97	1	100	1	Investigate	551	551	551							AEMJHAFI_00450																							LCMDHMFN_00617
group_460		hypothetical protein	3	3	1	101	1	101	1	Investigate	914	1010	946
group_464		hypothetical protein	3	3	1	112	4	113	5		260	338	312
group_748		hypothetical protein	3	3	1	98	1	103	2	Investigate	101	101	101
group_94		hypothetical protein	3	3	1	100	1	97	1	Investigate	248	248	248
panC_2		Pantothenate synthetase	3	3	1	103	2	105	2	Investigate	362	788	504							AEMJHAFI_02194
yhgF_1		Protein YhgF	3	3	1	108	1	108	2		1967	2153	2029
deoB_3		Phosphopentomutase	2	2	1	118	7	118	2		269	269	269
epsH		Putative glycosyltransferase EpsH	2	2	1	90	1	93	1	Investigate	752	752	752
group_103		hypothetical protein	2	2	1	78	1	77	1	Investigate	278	278	278																																		NDPCDPJB_02042		FCONKICK_02097
group_108		hypothetical protein	2	2	1	122	9	122	14		347	749	548
group_121		hypothetical protein	2	2	1	93	1	85	1	Investigate	368	368	368
ptsG_1		PTS system glucose-specific EIICBA component	2	2	1						863	2036	1449				PLKPPOBK_00143
group_13		hypothetical protein	2	2	1	84	1	81	1	Investigate	1838	1838	1838	PIABIFAJ_01835				JOJEGDGL_01838
group_134		hypothetical protein	2	3	15	91	1	75	1	Investigate	242	242	242
yknY_4		putative ABC transporter ATP-binding protein YknY	2	3	15						275	275	275
group_175		hypothetical protein	2	3	15	106	2	107	1		245	245	245
group_180		CRISPR system single-strand-specific deoxyribonuclease Cas10/Csm1 (subtype III-A)	2	2	1	118	6	118	1		212	212	212
group_192		hypothetical protein	2	3	15	96	1	92	1	Investigate	974	974	974
group_208		Putative multidrug export ATP-binding/permease protein	2	3	15	83	1	80	1	Investigate	560	560	560
group_213		hypothetical protein	2	2	1	110	1	111	3		398	398	398
group_219		hypothetical protein	2	2	1	108	3	108	1		227	470	348
group_231		putative protein	2	2	1	118	5	118	4		485	485	485
group_263		hypothetical protein	2	2	1	74	1	83	1	Investigate	758	758	758								HAJCGENM_01954		AFOHJDFD_01953
group_264		hypothetical protein	2	2	1	95	1	94	1	Investigate	758	758	758																NHMBFMFC_02006	GOLKPCHP_02005
group_278		hypothetical protein	2	2	1	79	1	91	1	Investigate	497	497	497																							CJKMBCIL_02136		NGCPDDNK_02091
yfkN		hypothetical protein	2	2	1						239	1520	879																		ILLNCKDM_02174
cas9_2		CRISPR-associated endonuclease Cas9	2	3	15						2588	2588	2588
group_387		putative autolysin PH	2	2	1	85	1	86	1	Investigate	884	884	884
group_457		IS1182 family transposase ISSau3	2	2	1	87	1	88	1	Investigate	383	707	545
group_461		hypothetical protein	2	2	1	118	4	118	5		1175	1457	1316
group_594		hypothetical protein	2	2	1	119	5	119	6		611	611	611																NHMBFMFC_01966	GOLKPCHP_01965
group_736		hypothetical protein	2	2	1	122	6	122	11		296	296	296
group_738		hypothetical protein	2	2	1	122	8	122	13		269	269	269
group_739		hypothetical protein	2	2	1	122	35	122	16		137	137	137
group_742		hypothetical protein	2	2	1	122	33	122	17		215	215	215
group_743		hypothetical protein	2	2	1	122	32	122	18		320	320	320
group_749		hypothetical protein	2	2	1	80	1	87	1	Investigate	1016	1016	1016
group_784		hypothetical protein	2	2	1	120	3	120	3		278	278	278
group_816		hypothetical protein	2	2	1	82	1	96	1	Investigate	695	695	695
group_818		hypothetical protein	2	2	1	118	3	118	6		1544	1544	1544
group_820		hypothetical protein	2	2	1	118	1	118	8		13475	13475	13475
group_821		hypothetical protein	2	2	1	86	1	95	1	Investigate	7817	7817	7817
group_822		hypothetical protein	2	2	1	89	1	74	1	Investigate	1268	1268	1268
group_823		hypothetical protein	2	2	1	92	1	76	1	Investigate	254	254	254
group_827		hypothetical protein	2	2	1	112	7	113	2		161	161	161
group_828		hypothetical protein	2	2	1	112	6	113	3		269	269	269
group_829		hypothetical protein	2	2	1	112	5	113	4		1109	1109	1109
group_832		hypothetical protein	2	3	15	106	3	107	3		2180	2180	2180
group_833		hypothetical protein	2	3	15	106	1	107	2		782	782	782
group_835		hypothetical protein	2	3	15	111	4	110	1		341	341	341
group_836		hypothetical protein	2	3	15	111	3	110	2		515	515	515
group_837		hypothetical protein	2	3	15	111	2	110	3		137	137	137
group_838		hypothetical protein	2	3	15	111	1	110	4		407	407	407
group_87		hypothetical protein	2	2	1	103	1	105	1	Investigate	125	125	125
group_910		hypothetical protein	2	2	1	76	1	89	1	Investigate	1388	1394	1391																		ILLNCKDM_00504
lexA_3		LexA repressor	2	2	1	122	7	122	12		716	716	716
aldH1_2		4,4'-diaponeurosporen-aldehyde dehydrogenase	1	1	1	40	1	50	1	Investigate	605	605	605
deoC1		Deoxyribose-phosphate aldolase 1	1	1	1	61	1	27	1	Investigate	281	281	281
dgcC		putative diguanylate cyclase DgcC	1	1	1	15	1	18	1	Investigate	227	227	227							AEMJHAFI_02216
dut_1		Deoxyuridine 5'-triphosphate nucleotidohydrolase	1	1	1	122	30	122	20		515	515	515
gabD		Succinate-semialdehyde dehydrogenase [NADP(+)] GabD	1	1	1	32	1	6	1	Investigate	305	305	305									EDEAHILB_02220
gabR_1		HTH-type transcriptional regulatory protein GabR	1	1	1	22	1	58	1	Investigate	635	635	635					JOJEGDGL_01155
glcT_2		GlcA/glcB genes antiterminator	1	1	1	94	2	90	1	Investigate	287	287	287				PLKPPOBK_00142
group_10		hypothetical protein	1	1	1	104	1	102	1	Investigate	1838	1838	1838															PJGKKCFK_01880
group_102		hypothetical protein	1	1	1	59	1	1	1	Investigate	278	278	278
deoB_1		Phosphopentomutase	1	1	1						923	923	923
group_109		hypothetical protein	1	1	1	122	34	122	15		404	404	404
group_110		hypothetical protein	1	1	1	117	9	117	7		749	749	749
cadA_2		Cadmium-transporting ATPase	1	1	1						809	809	809
dinB_2		DNA polymerase IV	1	1	1						419	419	419							AEMJHAFI_00381
group_130		hypothetical protein	1	1	1	26	1	39	1	Investigate	353	353	353																													AACPNDDD_00522
group_137		hypothetical protein	1	1	1	39	1	51	1	Investigate	275	275	275																NHMBFMFC_01717
treP_2		PTS system trehalose-specific EIIBC component	1	1	1						236	236	236
group_151		hypothetical protein	1	1	1	62	1	23	1	Investigate	233	233	233																NHMBFMFC_00666
group_158		hypothetical protein	1	1	1	36	1	10	1	Investigate	1754	1754	1754																		ILLNCKDM_00793
gabR_1		HTH-type transcriptional regulatory protein GabR	1	1	1	22	1	58	1	Investigate	635	635	635			FFIHCCFO_01267
group_210		hypothetical protein	1	1	1	110	3	111	1		446	446	446																		ILLNCKDM_00591
group_217		hypothetical protein	1	1	1	108	2	108	3		296	296	296
group_239		hypothetical protein	1	1	1	70	1	38	1	Investigate	821	821	821
group_261		hypothetical protein	1	1	1	55	1	36	1	Investigate	758	758	758
group_262		hypothetical protein	1	1	1	35	1	65	1	Investigate	758	758	758			FFIHCCFO_01955
group_269		hypothetical protein	1	1	1	56	1	70	1	Investigate	1949	1949	1949	PIABIFAJ_02073
group_27		hypothetical protein	1	1	1	77	2	78	3		1034	1034	1034
group_271		hypothetical protein	1	1	1	30	1	68	1	Investigate	161	161	161							AEMJHAFI_02187
group_276		hypothetical protein	1	1	1	8	1	60	1	Investigate	497	497	497
group_28		hypothetical protein	1	1	1	27	1	33	1	Investigate	1526	1526	1526
group_281		Serine protease HtrA-like protein	1	1	1	81	2	82	1	Investigate	389	389	389																		ILLNCKDM_02176
group_302		hypothetical protein	1	1	1	68	1	17	1	Investigate	1619	1619	1619																		ILLNCKDM_01941
group_317		hypothetical protein	1	1	1	122	13	122	35		275	275	275
group_318		hypothetical protein	1	1	1	122	12	122	34		344	344	344
group_319		hypothetical protein	1	1	1	122	11	122	33		3230	3230	3230
group_390		hypothetical protein	1	1	1	17	1	8	2	Investigate	584	584	584
group_416		hypothetical protein	1	1	1	12	1	69	1	Investigate	125	125	125
group_417		hypothetical protein	1	1	1	66	1	48	1	Investigate	125	125	125
group_418		hypothetical protein	1	1	1	28	1	24	1	Investigate	125	125	125												PJOACPKE_02229
group_46		hypothetical protein	1	1	1	122	15	122	37		425	425	425
group_52		hypothetical protein	1	1	1	65	1	20	1	Investigate	137	137	137														GGAFJLBN_00512
group_54		hypothetical protein	1	1	1	51	1	2	1	Investigate	224	224	224
group_577		hypothetical protein	1	1	1	38	1	52	1	Investigate	11051	11051	11051						OFFKHLAH_01921
group_578		hypothetical protein	1	1	1	25	1	3	1	Investigate	116	116	116							AEMJHAFI_02212
group_580		hypothetical protein	1	1	1	14	1	16	1	Investigate	608	608	608									EDEAHILB_02207
group_581		hypothetical protein	1	1	1	7	1	72	1	Investigate	452	452	452									EDEAHILB_02215
group_585		hypothetical protein	1	1	1	73	1	9	1	Investigate	107	107	107									EDEAHILB_02226
group_586		hypothetical protein	1	1	1	41	1	67	1	Investigate	206	206	206									EDEAHILB_02230
group_587		hypothetical protein	1	1	1	4	1	66	1	Investigate	1832	1832	1832										AFOHJDFD_01922
group_588		hypothetical protein	1	1	1	18	1	40	1	Investigate	548	548	548												PJOACPKE_02220
group_627		hypothetical protein	1	1	1	34	1	5	1	Investigate	1025	1025	1025																		ILLNCKDM_01197
group_68		hypothetical protein	1	1	1	6	1	25	1	Investigate	986	986	986																		ILLNCKDM_01770
group_704		hypothetical protein	1	1	1	72	1	55	1	Investigate	593	593	593																												MEDKDFCD_02099
group_711		hypothetical protein	1	1	1	37	1	32	1	Investigate	206	206	206																														LCMDHMFN_02311
group_712		hypothetical protein	1	1	1	53	1	34	1	Investigate	200	200	200																															KCNJADCF_02309
group_715		hypothetical protein	1	1	1	43	1	7	1	Investigate	602	602	602
group_716		hypothetical protein	1	1	1	50	1	26	1	Investigate	6935	6935	6935
group_717		hypothetical protein	1	1	1	13	1	44	1	Investigate	164	164	164
group_718		hypothetical protein	1	1	1	2	1	62	1	Investigate	416	416	416
group_719		hypothetical protein	1	1	1	46	1	59	1	Investigate	404	404	404
group_725		hypothetical protein	1	1	1	77	1	78	2		929	929	929
group_728		hypothetical protein	1	1	1	77	3	78	1		215	215	215
lexA_2		LexA repressor	1	1	1						629	629	629
group_731		hypothetical protein	1	1	1	105	3	98	2		227	227	227
group_732		hypothetical protein	1	1	1	105	2	98	3		218	218	218
group_733		hypothetical protein	1	1	1	105	1	98	4		332	332	332
group_735		hypothetical protein	1	1	1	10	1	35	1	Investigate	413	413	413
group_75		hypothetical protein	1	1	1	31	1	63	1	Investigate	539	539	539							AEMJHAFI_01946
group_770		hypothetical protein	1	1	1	113	3	112	4		143	143	143
group_771		hypothetical protein	1	1	1	113	2	112	5		146	146	146
group_772		hypothetical protein	1	1	1	58	1	56	1	Investigate	110	110	110
group_78		hypothetical protein	1	1	1	17	2	8	1	Investigate	392	392	392
sdrC		Serine-aspartate repeat-containing protein C	1	1	1						2186	2186	2186																						JDMMIIPE_02202
group_807		hypothetical protein	1	1	1	33	1	19	1	Investigate	230	230	230
group_808		hypothetical protein	1	1	1	60	1	30	1	Investigate	128	128	128
group_809		hypothetical protein	1	1	1	48	1	57	1	Investigate	185	185	185
group_810		hypothetical protein	1	1	1	67	1	43	1	Investigate	188	188	188
group_811		hypothetical protein	1	1	1	3	1	14	1	Investigate	125	125	125
group_812		hypothetical protein	1	1	1	52	1	46	1	Investigate	137	137	137
group_813		hypothetical protein	1	1	1	64	1	71	1	Investigate	170	170	170
group_814		hypothetical protein	1	1	1	57	1	54	1	Investigate	212	212	212
group_819		hypothetical protein	1	1	1	118	2	118	7		1196	1196	1196
group_824		hypothetical protein	1	1	1	5	1	53	1	Investigate	161	161	161
group_826		hypothetical protein	1	1	1	1	1	13	1	Investigate	89	89	89
group_830		hypothetical protein	1	1	1	112	3	113	1		158	158	158
group_831		hypothetical protein	1	1	1	54	1	49	1	Investigate	476	476	476
group_834		hypothetical protein	1	2	2	42	1	61	1	Investigate	1004	1004	1004
group_839		hypothetical protein	1	1	1	9	1	12	1	Investigate	287	287	287
group_84		putative ABC transporter ATP-binding protein	1	1	1	45	1	21	1	Investigate	317	317	317
group_840		hypothetical protein	1	1	1	112	2	113	6		1109	1109	1109
group_842		hypothetical protein	1	1	1	21	1	47	1	Investigate	206	206	206
group_843		hypothetical protein	1	1	1	120	1	120	1		968	968	968
group_844		hypothetical protein	1	1	1	20	1	28	1	Investigate	1370	1370	1370
group_845		hypothetical protein	1	1	1	23	2	4	1	Investigate	194	194	194
group_846		hypothetical protein	1	1	1	122	36	122	10		209	209	209
group_847		hypothetical protein	1	1	1	122	37	122	9		173	173	173
group_848		hypothetical protein	1	1	1	122	38	122	8		275	275	275
group_849		hypothetical protein	1	1	1	122	39	122	7		278	278	278
group_85		putative ABC transporter ATP-binding protein	1	1	1	63	1	22	1	Investigate	317	317	317
group_850		hypothetical protein	1	1	1	122	40	122	6		1949	1949	1949
group_851		hypothetical protein	1	1	1	122	5	122	5		206	206	206
group_852		hypothetical protein	1	1	1	122	4	122	4		743	743	743
group_853		hypothetical protein	1	1	1	122	3	122	3		590	590	590
ssbA_2		Single-stranded DNA-binding protein A	1	1	1						485	485	485
group_855		hypothetical protein	1	1	1	122	1	122	1		788	788	788
group_856		hypothetical protein	1	1	1	49	1	31	1	Investigate	179	179	179
group_857		hypothetical protein	1	1	1	117	13	117	1		1946	1946	1946
group_858		hypothetical protein	1	1	1	117	14	117	2		284	284	284
group_859		hypothetical protein	1	1	1	117	15	117	3		272	272	272
group_860		hypothetical protein	1	1	1	117	12	117	4		179	179	179
group_861		hypothetical protein	1	1	1	117	11	117	5		209	209	209
group_862		hypothetical protein	1	1	1	117	10	117	6		92	92	92
group_863		hypothetical protein	1	1	1	117	8	117	8		221	221	221
group_864		hypothetical protein	1	1	1	117	7	117	15		191	191	191
group_865		hypothetical protein	1	1	1	117	6	117	14		773	773	773
group_866		hypothetical protein	1	1	1	117	5	117	13		209	209	209
group_867		hypothetical protein	1	1	1	117	4	117	12		329	329	329
group_868		hypothetical protein	1	1	1	117	3	117	11		473	473	473
group_869		hypothetical protein	1	1	1	117	2	117	10		791	791	791
group_871		hypothetical protein	1	1	1	122	31	122	19		332	332	332
group_872		hypothetical protein	1	1	1	122	29	122	21		173	173	173
group_873		hypothetical protein	1	1	1	122	28	122	22		179	179	179
group_874		hypothetical protein	1	1	1	122	27	122	23		401	401	401
group_875		hypothetical protein	1	1	1	122	26	122	24		494	494	494
group_876		hypothetical protein	1	1	1	122	25	122	25		986	986	986
group_877		hypothetical protein	1	1	1	122	24	122	26		587	587	587
group_878		hypothetical protein	1	1	1	122	23	122	27		1418	1418	1418
group_879		NAD(+)--arginine ADP-ribosyltransferase EFV	1	1	1	122	22	122	28		944	944	944
group_880		hypothetical protein	1	1	1	122	21	122	29		599	599	599
group_881		hypothetical protein	1	1	1	122	20	122	30		815	815	815
group_882		hypothetical protein	1	1	1	122	19	122	31		281	281	281
group_883		hypothetical protein	1	1	1	122	18	122	40		296	296	296
group_884		hypothetical protein	1	1	1	122	17	122	39		335	335	335
group_885		hypothetical protein	1	1	1	122	16	122	38		413	413	413
group_886		hypothetical protein	1	1	1	122	14	122	36		494	494	494
group_887		hypothetical protein	1	1	1	122	10	122	32		917	917	917
group_888		hypothetical protein	1	1	1	121	2	121	5		566	566	566
group_889		hypothetical protein	1	1	1	121	1	121	3		335	335	335
group_890		hypothetical protein	1	1	1	99	1	99	2		818	818	818
group_891		hypothetical protein	1	1	1	99	2	99	3		281	281	281
group_892		hypothetical protein	1	1	1	99	3	99	4		482	482	482
group_893		hypothetical protein	1	1	1	99	4	99	1		551	551	551
lacE_1		PTS system lactose-specific EIICB component	1	1	1	23	1	4	2	Investigate	797	797	797
nifS_2		Cysteine desulfurase NifS	1	1	1	24	1	11	1	Investigate	236	236	236																													AACPNDDD_02307
pepP		Xaa-Pro aminopeptidase	1	1	1	16	1	29	1	Investigate	191	191	191												PJOACPKE_02226
repD		Replication initiation protein	1	1	1	112	1	113	7		944	944	944
rpoB_2		DNA-directed RNA polymerase subunit beta	1	1	1	19	1	45	1	Investigate	206	206	206									EDEAHILB_02225
tmcAL_1		tRNA(Met) cytidine acetate ligase	1	1	1	69	1	41	1	Investigate	104	104	104		NGMFAEIO_00913
xerC_4		Tyrosine recombinase XerC	1	1	1	117	1	117	9		1049	1049	1049
yxeN		putative amino-acid permease protein YxeN	1	1	1	11	1	15	1	Investigate	263	263	263																		ILLNCKDM_01554
[truncated: 56 more columns]

## Sheet: Table S3i
Table S3i: Genes unique for S. rostri isolates found in mixed culture with ≥2 other bacterial species (considered as contamination) (n=12). The isolates are marked in color:
Gene	Non-unique Gene name	Annotation	No. isolates	No. sequences	Avg sequences per isolate	Genome Fragment	Order within Fragment	Accessory Fragment	Accessory Order with Fragment	QC	Min group size nuc	Max group size nuc	Avg group size nuc	SR10_H1C6a	SR11_H1C6b	SR12_H1C7a	SR13_H1C7b	SR14_H1C7c	SR15_H1C8	SR16_H1C9a	SR17_H1C9b	SR18_H1C10	SR19_H1C11	SR1_H1C1a	SR20_H1C12	SR21_H1C13	SR22_H1C14	SR23_H1C15a	SR24_H1C15b	SR25_H1C16	SR26_H2C1	SR27_H3C1a	SR28_H3C1b	SR29_H3C1c	SR2_H1C1b	SR30_H3C1d	SR31_H3C2a	SR32_H3C2b	SR33_H3C3a	SR34_H3C3b	SR35_H3C3c	SR36_H3C4	SR37_H3C5	SR38_H3C6a	SR39_H3C6b	SR3_H1C2	SR40_H3C7a	SR41_H3C7b	SR42_H3C8a
dapE		putative succinyl-diaminopimelate desuccinylase	1	1	1	11	1	15	1	Investigate	98	98	98
deoB		Phosphopentomutase	1	1	1						611	611	611
group_165		hypothetical protein	1	1	1	2	1	26	1	Investigate	152	152	152
group_23		hypothetical protein	1	1	1	6	1	1	1	Investigate	2723	2723	2723
group_277		hypothetical protein	1	1	1	23	1	25	1	Investigate	497	497	497
group_289		hypothetical protein	1	1	1	10	1	17	1	Investigate	1517	1517	1517
group_296		hypothetical protein	1	1	1	25	1	24	1	Investigate	377	377	377
group_298		hypothetical protein	1	1	1	5	1	5	1	Investigate	377	377	377
group_43		hypothetical protein	1	1	1	3	1	11	1	Investigate	158	158	158
group_79		hypothetical protein	1	1	1	20	1	13	1	Investigate	905	905	905
group_894		hypothetical protein	1	1	1	18	1	22	1	Investigate	686	686	686
group_895		hypothetical protein	1	1	1	13	1	16	1	Investigate	152	152	152
group_896		hypothetical protein	1	1	1	14	1	3	1	Investigate	7352	7352	7352
group_897		hypothetical protein	1	1	1	19	1	12	1	Investigate	194	194	194
group_900		hypothetical protein	1	1	1	7	1	14	1	Investigate	167	167	167
group_901		hypothetical protein	1	1	1	4	1	23	1	Investigate	998	998	998
group_902		hypothetical protein	1	1	1	1	1	20	1	Investigate	611	611	611
group_903		hypothetical protein	1	1	1	9	1	6	1	Investigate	503	503	503
group_904		hypothetical protein	1	1	1	24	1	10	1	Investigate	95	95	95
group_906		hypothetical protein	1	1	1	12	1	21	1	Investigate	1364	1364	1364
group_907		hypothetical protein	1	1	1	26	1	19	1	Investigate	965	965	965
group_908		hypothetical protein	1	1	1	16	1	18	1	Investigate	170	170	170
lptB		Lipopolysaccharide export system ATP-binding protein LptB	1	1	1	17	1	2	1	Investigate	242	242	242
scrB_1		Sucrose-6-phosphate hydrolase	1	1	1	8	1	4	1	Investigate	644	644	644
yjbM_2		GTP pyrophosphokinase YjbM	1	1	1	21	1	7	1	Investigate	230	230	230
znuC		Zinc import ATP-binding protein ZnuC	1	1	1	22	1	8	1	Investigate	329	329	329
[truncated: 56 more columns]
