# Supplementary material for: Comparative Genomics of Staphylococcus rostri, an Undescribed Bacterium Isolated from Dairy Mastitis
Source: Vet Sci. 2023 Aug 22;10(9):530. doi: 10.3390/vetsci10090530 (PMC10534715; doi:10.3390/vetsci10090530)
Supplement: Supplementary file 1 [file vetsci-10-00530-s001.zip › Table S4 Presence of virulence, resistance and plasmid genes.xlsx]

## Sheet: Overivew
Table S4 Presence of virulence, resistance and plasmid genes
Content:
Sheet 1:	Overview of sheets
Sheet 2:	Resistance genes
Sheet 3:	Virulence genes
Sheet 4:	Plasmids

## Sheet: Virulence genes
#FILE	SEQUENCE	START	END	STRAND	GENE	COVERAGE	COVERAGE_MAP	GAPS	%COVERAGE	%IDENTITY	DATABASE	ACCESSION	PRODUCT
SR1_H1.C1a.fasta	NODE_4_length_197968_cov_220.187816	106620	107182	-	clpP	1-563/597	===============	0/0	94.30	75.49	vfdb	NP_465991	(clpP) ATP-dependent Clp protease proteolytic subunit [ClpP (VF0074)] [Listeria monocytogenes EGD-e]
SR1_H1.C1a.fasta	NODE_6_length_156075_cov_233.803619	9045	11319	+	clpC	50-2321/2463	========/======	39/77	90.74	70.28	vfdb	NP_463763	(clpC) endopeptidase Clp ATP-binding chain C [ClpC (VF0072)] [Listeria monocytogenes EGD-e]
SR2_H1. C1b.fasta	NODE_3_length_241020_cov_214.770817	106719	107281	-	clpP	1-563/597	===============	0/0	94.30	75.49	vfdb	NP_465991	(clpP) ATP-dependent Clp protease proteolytic subunit [ClpP (VF0074)] [Listeria monocytogenes EGD-e]
SR2_H1. C1b.fasta	NODE_6_length_156075_cov_220.905685	144757	147031	-	clpC	50-2321/2463	========/======	39/77	90.74	70.28	vfdb	NP_463763	(clpC) endopeptidase Clp ATP-binding chain C [ClpC (VF0072)] [Listeria monocytogenes EGD-e]
SR3_H1.C2.fasta	NODE_3_length_241370_cov_224.319243	106721	107283	-	clpP	1-563/597	===============	0/0	94.30	75.49	vfdb	NP_465991	(clpP) ATP-dependent Clp protease proteolytic subunit [ClpP (VF0074)] [Listeria monocytogenes EGD-e]
SR3_H1.C2.fasta	NODE_6_length_156075_cov_233.118040	144757	147031	-	clpC	50-2321/2463	========/======	39/77	90.74	70.28	vfdb	NP_463763	(clpC) endopeptidase Clp ATP-binding chain C [ClpC (VF0072)] [Listeria monocytogenes EGD-e]
SR4_H1.C3a.fasta	NODE_3_length_241288_cov_240.627136	134006	134568	+	clpP	1-563/597	===============	0/0	94.30	75.49	vfdb	NP_465991	(clpP) ATP-dependent Clp protease proteolytic subunit [ClpP (VF0074)] [Listeria monocytogenes EGD-e]
SR4_H1.C3a.fasta	NODE_6_length_156075_cov_233.354453	144757	147031	-	clpC	50-2321/2463	========/======	39/77	90.74	70.28	vfdb	NP_463763	(clpC) endopeptidase Clp ATP-binding chain C [ClpC (VF0072)] [Listeria monocytogenes EGD-e]
SR5_H1.C3b.fasta	NODE_3_length_241268_cov_224.939181	106619	107181	-	clpP	1-563/597	===============	0/0	94.30	75.49	vfdb	NP_465991	(clpP) ATP-dependent Clp protease proteolytic subunit [ClpP (VF0074)] [Listeria monocytogenes EGD-e]
SR5_H1.C3b.fasta	NODE_6_length_156075_cov_234.797408	144757	147031	-	clpC	50-2321/2463	========/======	39/77	90.74	70.28	vfdb	NP_463763	(clpC) endopeptidase Clp ATP-binding chain C [ClpC (VF0072)] [Listeria monocytogenes EGD-e]
SR6_H1.C3c.fasta	NODE_5_length_156175_cov_247.673058	9045	11319	+	clpC	50-2321/2463	========/======	39/77	90.74	70.28	vfdb	NP_463763	(clpC) endopeptidase Clp ATP-binding chain C [ClpC (VF0072)] [Listeria monocytogenes EGD-e]
SR6_H1.C3c.fasta	NODE_7_length_107540_cov_202.154974	260	822	+	clpP	1-563/597	===============	0/0	94.30	75.49	vfdb	NP_465991	(clpP) ATP-dependent Clp protease proteolytic subunit [ClpP (VF0074)] [Listeria monocytogenes EGD-e]
SR7_H1.C4.fasta	NODE_3_length_241125_cov_239.775455	133942	134504	+	clpP	1-563/597	===============	0/0	94.30	75.49	vfdb	NP_465991	(clpP) ATP-dependent Clp protease proteolytic subunit [ClpP (VF0074)] [Listeria monocytogenes EGD-e]
SR7_H1.C4.fasta	NODE_6_length_156075_cov_249.257221	9045	11319	+	clpC	50-2321/2463	========/======	39/77	90.74	70.28	vfdb	NP_463763	(clpC) endopeptidase Clp ATP-binding chain C [ClpC (VF0072)] [Listeria monocytogenes EGD-e]
SR8_H1.C5a.fasta	NODE_3_length_241369_cov_241.097455	134189	134751	+	clpP	1-563/597	===============	0/0	94.30	75.49	vfdb	NP_465991	(clpP) ATP-dependent Clp protease proteolytic subunit [ClpP (VF0074)] [Listeria monocytogenes EGD-e]
SR8_H1.C5a.fasta	NODE_6_length_156175_cov_238.023229	9045	11319	+	clpC	50-2321/2463	========/======	39/77	90.74	70.28	vfdb	NP_463763	(clpC) endopeptidase Clp ATP-binding chain C [ClpC (VF0072)] [Listeria monocytogenes EGD-e]
SR9_H1.C5b.fasta	NODE_3_length_241268_cov_250.706618	106719	107281	-	clpP	1-563/597	===============	0/0	94.30	75.49	vfdb	NP_465991	(clpP) ATP-dependent Clp protease proteolytic subunit [ClpP (VF0074)] [Listeria monocytogenes EGD-e]
SR9_H1.C5b.fasta	NODE_6_length_156074_cov_248.938172	9045	11319	+	clpC	50-2321/2463	========/======	39/77	90.74	70.28	vfdb	NP_463763	(clpC) endopeptidase Clp ATP-binding chain C [ClpC (VF0072)] [Listeria monocytogenes EGD-e]
SR10_H1.C6a.fasta	NODE_5_length_156075_cov_216.978692	144757	147031	-	clpC	50-2321/2463	========/======	39/77	90.74	70.28	vfdb	NP_463763	(clpC) endopeptidase Clp ATP-binding chain C [ClpC (VF0072)] [Listeria monocytogenes EGD-e]
SR10_H1.C6a.fasta	NODE_7_length_107540_cov_197.656663	106719	107281	-	clpP	1-563/597	===============	0/0	94.30	75.49	vfdb	NP_465991	(clpP) ATP-dependent Clp protease proteolytic subunit [ClpP (VF0074)] [Listeria monocytogenes EGD-e]
SR11_H1.C6b.fasta	NODE_4_length_198168_cov_205.919047	90987	91549	+	clpP	1-563/597	===============	0/0	94.30	75.49	vfdb	NP_465991	(clpP) ATP-dependent Clp protease proteolytic subunit [ClpP (VF0074)] [Listeria monocytogenes EGD-e]
SR11_H1.C6b.fasta	NODE_6_length_155869_cov_215.762998	144757	147031	-	clpC	50-2321/2463	========/======	39/77	90.74	70.28	vfdb	NP_463763	(clpC) endopeptidase Clp ATP-binding chain C [ClpC (VF0072)] [Listeria monocytogenes EGD-e]
SR12_H1.C7a.fasta	NODE_5_length_156170_cov_241.436503	9040	11314	+	clpC	50-2321/2463	========/======	39/77	90.74	70.28	vfdb	NP_463763	(clpC) endopeptidase Clp ATP-binding chain C [ClpC (VF0072)] [Listeria monocytogenes EGD-e]
SR12_H1.C7a.fasta	NODE_7_length_107440_cov_218.834673	106619	107181	-	clpP	1-563/597	===============	0/0	94.30	75.49	vfdb	NP_465991	(clpP) ATP-dependent Clp protease proteolytic subunit [ClpP (VF0074)] [Listeria monocytogenes EGD-e]
SR13_H1.C7b.fasta	NODE_3_length_241170_cov_226.218459	106621	107183	-	clpP	1-563/597	===============	0/0	94.30	75.49	vfdb	NP_465991	(clpP) ATP-dependent Clp protease proteolytic subunit [ClpP (VF0074)] [Listeria monocytogenes EGD-e]
SR13_H1.C7b.fasta	NODE_6_length_156174_cov_228.038687	9045	11319	+	clpC	50-2321/2463	========/======	39/77	90.74	70.28	vfdb	NP_463763	(clpC) endopeptidase Clp ATP-binding chain C [ClpC (VF0072)] [Listeria monocytogenes EGD-e]
SR14_H1.C7c.fasta	NODE_5_length_156071_cov_225.575452	9040	11314	+	clpC	50-2321/2463	========/======	39/77	90.74	70.28	vfdb	NP_463763	(clpC) endopeptidase Clp ATP-binding chain C [ClpC (VF0072)] [Listeria monocytogenes EGD-e]
SR14_H1.C7c.fasta	NODE_8_length_107540_cov_196.393717	260	822	+	clpP	1-563/597	===============	0/0	94.30	75.49	vfdb	NP_465991	(clpP) ATP-dependent Clp protease proteolytic subunit [ClpP (VF0074)] [Listeria monocytogenes EGD-e]
SR15_H1.C8.fasta	NODE_3_length_241468_cov_246.764192	106719	107281	-	clpP	1-563/597	===============	0/0	94.30	75.49	vfdb	NP_465991	(clpP) ATP-dependent Clp protease proteolytic subunit [ClpP (VF0074)] [Listeria monocytogenes EGD-e]
SR15_H1.C8.fasta	NODE_6_length_156075_cov_243.589488	9045	11319	+	clpC	50-2321/2463	========/======	39/77	90.74	70.28	vfdb	NP_463763	(clpC) endopeptidase Clp ATP-binding chain C [ClpC (VF0072)] [Listeria monocytogenes EGD-e]
SR16_H1.C9a.fasta	NODE_3_length_241368_cov_269.757181	106719	107281	-	clpP	1-563/597	===============	0/0	94.30	75.49	vfdb	NP_465991	(clpP) ATP-dependent Clp protease proteolytic subunit [ClpP (VF0074)] [Listeria monocytogenes EGD-e]
SR16_H1.C9a.fasta	NODE_6_length_156075_cov_270.484057	9045	11319	+	clpC	50-2321/2463	========/======	39/77	90.74	70.28	vfdb	NP_463763	(clpC) endopeptidase Clp ATP-binding chain C [ClpC (VF0072)] [Listeria monocytogenes EGD-e]
SR17_H1.C9b.fasta	NODE_3_length_241369_cov_247.247071	134189	134751	+	clpP	1-563/597	===============	0/0	94.30	75.49	vfdb	NP_465991	(clpP) ATP-dependent Clp protease proteolytic subunit [ClpP (VF0074)] [Listeria monocytogenes EGD-e]
SR17_H1.C9b.fasta	NODE_6_length_155991_cov_247.378074	8861	11135	+	clpC	50-2321/2463	========/======	39/77	90.74	70.28	vfdb	NP_463763	(clpC) endopeptidase Clp ATP-binding chain C [ClpC (VF0072)] [Listeria monocytogenes EGD-e]
SR18_H1.C10.fasta	NODE_3_length_241121_cov_235.726407	106719	107281	-	clpP	1-563/597	===============	0/0	94.30	75.49	vfdb	NP_465991	(clpP) ATP-dependent Clp protease proteolytic subunit [ClpP (VF0074)] [Listeria monocytogenes EGD-e]
SR18_H1.C10.fasta	NODE_6_length_156076_cov_230.816018	144758	147032	-	clpC	50-2321/2463	========/======	39/77	90.74	70.28	vfdb	NP_463763	(clpC) endopeptidase Clp ATP-binding chain C [ClpC (VF0072)] [Listeria monocytogenes EGD-e]
SR19_H1.C11.fasta	NODE_3_length_241268_cov_265.085210	106719	107281	-	clpP	1-563/597	===============	0/0	94.30	75.49	vfdb	NP_465991	(clpP) ATP-dependent Clp protease proteolytic subunit [ClpP (VF0074)] [Listeria monocytogenes EGD-e]
SR19_H1.C11.fasta	NODE_6_length_156075_cov_247.480769	144757	147031	-	clpC	50-2321/2463	========/======	39/77	90.74	70.28	vfdb	NP_463763	(clpC) endopeptidase Clp ATP-binding chain C [ClpC (VF0072)] [Listeria monocytogenes EGD-e]
SR20_H1.C12.fasta	NODE_5_length_156176_cov_226.916950	144858	147132	-	clpC	50-2321/2463	========/======	39/77	90.74	70.28	vfdb	NP_463763	(clpC) endopeptidase Clp ATP-binding chain C [ClpC (VF0072)] [Listeria monocytogenes EGD-e]
SR20_H1.C12.fasta	NODE_8_length_107540_cov_206.357956	106719	107281	-	clpP	1-563/597	===============	0/0	94.30	75.49	vfdb	NP_465991	(clpP) ATP-dependent Clp protease proteolytic subunit [ClpP (VF0074)] [Listeria monocytogenes EGD-e]
SR21_H1.C13.fasta	NODE_3_length_241268_cov_269.020055	133988	134550	+	clpP	1-563/597	===============	0/0	94.30	75.49	vfdb	NP_465991	(clpP) ATP-dependent Clp protease proteolytic subunit [ClpP (VF0074)] [Listeria monocytogenes EGD-e]
SR21_H1.C13.fasta	NODE_6_length_156074_cov_269.175779	144756	147030	-	clpC	50-2321/2463	========/======	39/77	90.74	70.28	vfdb	NP_463763	(clpC) endopeptidase Clp ATP-binding chain C [ClpC (VF0072)] [Listeria monocytogenes EGD-e]
SR22_H1.C14.fasta	NODE_3_length_241370_cov_236.669037	106621	107183	-	clpP	1-563/597	===============	0/0	94.30	75.49	vfdb	NP_465991	(clpP) ATP-dependent Clp protease proteolytic subunit [ClpP (VF0074)] [Listeria monocytogenes EGD-e]
SR22_H1.C14.fasta	NODE_6_length_156074_cov_243.762451	9045	11319	+	clpC	50-2321/2463	========/======	39/77	90.74	70.28	vfdb	NP_463763	(clpC) endopeptidase Clp ATP-binding chain C [ClpC (VF0072)] [Listeria monocytogenes EGD-e]
SR23_H1.C15a.fasta	NODE_5_length_156076_cov_242.565157	9045	11319	+	clpC	50-2321/2463	========/======	39/77	90.74	70.28	vfdb	NP_463763	(clpC) endopeptidase Clp ATP-binding chain C [ClpC (VF0072)] [Listeria monocytogenes EGD-e]
SR23_H1.C15a.fasta	NODE_8_length_107540_cov_230.253511	106719	107281	-	clpP	1-563/597	===============	0/0	94.30	75.49	vfdb	NP_465991	(clpP) ATP-dependent Clp protease proteolytic subunit [ClpP (VF0074)] [Listeria monocytogenes EGD-e]
SR24_H1.C15b.fasta	NODE_3_length_241370_cov_276.609355	106721	107283	-	clpP	1-563/597	===============	0/0	94.30	75.49	vfdb	NP_465991	(clpP) ATP-dependent Clp protease proteolytic subunit [ClpP (VF0074)] [Listeria monocytogenes EGD-e]
SR24_H1.C15b.fasta	NODE_6_length_156075_cov_284.211227	9045	11319	+	clpC	50-2321/2463	========/======	39/77	90.74	70.28	vfdb	NP_463763	(clpC) endopeptidase Clp ATP-binding chain C [ClpC (VF0072)] [Listeria monocytogenes EGD-e]
SR25_H1.C16.fasta	NODE_3_length_241253_cov_266.152109	106619	107181	-	clpP	1-563/597	===============	0/0	94.30	75.49	vfdb	NP_465991	(clpP) ATP-dependent Clp protease proteolytic subunit [ClpP (VF0074)] [Listeria monocytogenes EGD-e]
SR25_H1.C16.fasta	NODE_6_length_156074_cov_270.173619	9045	11319	+	clpC	50-2321/2463	========/======	39/77	90.74	70.28	vfdb	NP_463763	(clpC) endopeptidase Clp ATP-binding chain C [ClpC (VF0072)] [Listeria monocytogenes EGD-e]
SR26_H2.C1.fasta	NODE_11_length_90635_cov_227.098545	79243	81517	-	clpC	50-2321/2463	========/======	39/77	90.74	70.33	vfdb	NP_463763	(clpC) endopeptidase Clp ATP-binding chain C [ClpC (VF0072)] [Listeria monocytogenes EGD-e]
SR26_H2.C1.fasta	NODE_3_length_194483_cov_236.581736	109193	109755	-	clpP	1-563/597	===============	0/0	94.30	75.49	vfdb	NP_465991	(clpP) ATP-dependent Clp protease proteolytic subunit [ClpP (VF0074)] [Listeria monocytogenes EGD-e]
SR27_H3.C1a.fasta	NODE_7_length_136025_cov_216.290699	109194	109756	-	clpP	1-563/597	===============	0/0	94.30	75.49	vfdb	NP_465991	(clpP) ATP-dependent Clp protease proteolytic subunit [ClpP (VF0074)] [Listeria monocytogenes EGD-e]
SR27_H3.C1a.fasta	NODE_9_length_92902_cov_244.781664	8855	11129	+	clpC	50-2321/2463	========/======	39/77	90.74	70.33	vfdb	NP_463763	(clpC) endopeptidase Clp ATP-binding chain C [ClpC (VF0072)] [Listeria monocytogenes EGD-e]
SR28_H3.C1b.fasta	NODE_7_length_136025_cov_238.405743	109194	109756	-	clpP	1-563/597	===============	0/0	94.30	75.49	vfdb	NP_465991	(clpP) ATP-dependent Clp protease proteolytic subunit [ClpP (VF0074)] [Listeria monocytogenes EGD-e]
SR28_H3.C1b.fasta	NODE_9_length_92902_cov_260.629281	8855	11129	+	clpC	50-2321/2463	========/======	39/77	90.74	70.33	vfdb	NP_463763	(clpC) endopeptidase Clp ATP-binding chain C [ClpC (VF0072)] [Listeria monocytogenes EGD-e]
SR29_H3.C1c.fasta	NODE_7_length_135925_cov_276.328499	109094	109656	-	clpP	1-563/597	===============	0/0	94.30	75.49	vfdb	NP_465991	(clpP) ATP-dependent Clp protease proteolytic subunit [ClpP (VF0074)] [Listeria monocytogenes EGD-e]
SR29_H3.C1c.fasta	NODE_9_length_92899_cov_297.691399	8855	11129	+	clpC	50-2321/2463	========/======	39/77	90.74	70.33	vfdb	NP_463763	(clpC) endopeptidase Clp ATP-binding chain C [ClpC (VF0072)] [Listeria monocytogenes EGD-e]
SR30_H3.C1d.fasta	NODE_7_length_135925_cov_230.033994	109094	109656	-	clpP	1-563/597	===============	0/0	94.30	75.49	vfdb	NP_465991	(clpP) ATP-dependent Clp protease proteolytic subunit [ClpP (VF0074)] [Listeria monocytogenes EGD-e]
SR30_H3.C1d.fasta	NODE_9_length_92899_cov_246.902954	8855	11129	+	clpC	50-2321/2463	========/======	39/77	90.74	70.33	vfdb	NP_463763	(clpC) endopeptidase Clp ATP-binding chain C [ClpC (VF0072)] [Listeria monocytogenes EGD-e]
SR31_H3.C2a.fasta	NODE_7_length_136025_cov_212.955093	109194	109756	-	clpP	1-563/597	===============	0/0	94.30	75.49	vfdb	NP_465991	(clpP) ATP-dependent Clp protease proteolytic subunit [ClpP (VF0074)] [Listeria monocytogenes EGD-e]
SR31_H3.C2a.fasta	NODE_9_length_92899_cov_224.025231	8855	11129	+	clpC	50-2321/2463	========/======	39/77	90.74	70.33	vfdb	NP_463763	(clpC) endopeptidase Clp ATP-binding chain C [ClpC (VF0072)] [Listeria monocytogenes EGD-e]
SR32_H3.C2b.fasta	NODE_4_length_200862_cov_225.854202	109194	109756	-	clpP	1-563/597	===============	0/0	94.30	75.49	vfdb	NP_465991	(clpP) ATP-dependent Clp protease proteolytic subunit [ClpP (VF0074)] [Listeria monocytogenes EGD-e]
SR32_H3.C2b.fasta	NODE_8_length_92899_cov_243.099696	8855	11129	+	clpC	50-2321/2463	========/======	39/77	90.74	70.33	vfdb	NP_463763	(clpC) endopeptidase Clp ATP-binding chain C [ClpC (VF0072)] [Listeria monocytogenes EGD-e]
SR33_H3.C3a.fasta	NODE_3_length_200762_cov_260.614725	91007	91569	+	clpP	1-563/597	===============	0/0	94.30	75.49	vfdb	NP_465991	(clpP) ATP-dependent Clp protease proteolytic subunit [ClpP (VF0074)] [Listeria monocytogenes EGD-e]
SR33_H3.C3a.fasta	NODE_8_length_92899_cov_290.811359	8855	11129	+	clpC	50-2321/2463	========/======	39/77	90.74	70.33	vfdb	NP_463763	(clpC) endopeptidase Clp ATP-binding chain C [ClpC (VF0072)] [Listeria monocytogenes EGD-e]
SR34_H3.C3b.fasta	NODE_7_length_135925_cov_167.230603	109094	109656	-	clpP	1-563/597	===============	0/0	94.30	75.49	vfdb	NP_465991	(clpP) ATP-dependent Clp protease proteolytic subunit [ClpP (VF0074)] [Listeria monocytogenes EGD-e]
SR34_H3.C3b.fasta	NODE_9_length_92899_cov_176.738112	81771	84045	-	clpC	50-2321/2463	========/======	39/77	90.74	70.33	vfdb	NP_463763	(clpC) endopeptidase Clp ATP-binding chain C [ClpC (VF0072)] [Listeria monocytogenes EGD-e]
SR35_H3.C3c.fasta	NODE_7_length_136025_cov_237.706513	109194	109756	-	clpP	1-563/597	===============	0/0	94.30	75.49	vfdb	NP_465991	(clpP) ATP-dependent Clp protease proteolytic subunit [ClpP (VF0074)] [Listeria monocytogenes EGD-e]
SR35_H3.C3c.fasta	NODE_9_length_93002_cov_269.355760	8855	11129	+	clpC	50-2321/2463	========/======	39/77	90.74	70.33	vfdb	NP_463763	(clpC) endopeptidase Clp ATP-binding chain C [ClpC (VF0072)] [Listeria monocytogenes EGD-e]
SR36_H3.C4.fasta	NODE_4_length_200662_cov_250.565965	109094	109656	-	clpP	1-563/597	===============	0/0	94.30	75.49	vfdb	NP_465991	(clpP) ATP-dependent Clp protease proteolytic subunit [ClpP (VF0074)] [Listeria monocytogenes EGD-e]
SR36_H3.C4.fasta	NODE_8_length_92899_cov_275.378035	8855	11129	+	clpC	50-2321/2463	========/======	39/77	90.74	70.33	vfdb	NP_463763	(clpC) endopeptidase Clp ATP-binding chain C [ClpC (VF0072)] [Listeria monocytogenes EGD-e]
SR37_H3.C5.fasta	NODE_7_length_135925_cov_204.948891	109094	109656	-	clpP	1-563/597	===============	0/0	94.30	75.49	vfdb	NP_465991	(clpP) ATP-dependent Clp protease proteolytic subunit [ClpP (VF0074)] [Listeria monocytogenes EGD-e]
SR37_H3.C5.fasta	NODE_9_length_92999_cov_217.861830	8855	11129	+	clpC	50-2321/2463	========/======	39/77	90.74	70.33	vfdb	NP_463763	(clpC) endopeptidase Clp ATP-binding chain C [ClpC (VF0072)] [Listeria monocytogenes EGD-e]
SR38_H3.C6a.fasta	NODE_7_length_135925_cov_197.542525	109094	109656	-	clpP	1-563/597	===============	0/0	94.30	75.49	vfdb	NP_465991	(clpP) ATP-dependent Clp protease proteolytic subunit [ClpP (VF0074)] [Listeria monocytogenes EGD-e]
SR38_H3.C6a.fasta	NODE_9_length_92999_cov_211.599546	81871	84145	-	clpC	50-2321/2463	========/======	39/77	90.74	70.33	vfdb	NP_463763	(clpC) endopeptidase Clp ATP-binding chain C [ClpC (VF0072)] [Listeria monocytogenes EGD-e]
SR39_H3.C6b.fasta	NODE_7_length_135925_cov_212.627849	26270	26832	+	clpP	1-563/597	===============	0/0	94.30	75.49	vfdb	NP_465991	(clpP) ATP-dependent Clp protease proteolytic subunit [ClpP (VF0074)] [Listeria monocytogenes EGD-e]
SR39_H3.C6b.fasta	NODE_9_length_92899_cov_232.586359	81771	84045	-	clpC	50-2321/2463	========/======	39/77	90.74	70.33	vfdb	NP_463763	(clpC) endopeptidase Clp ATP-binding chain C [ClpC (VF0072)] [Listeria monocytogenes EGD-e]
SR40_H3.C7a.fasta	NODE_10_length_92999_cov_238.914068	8855	11129	+	clpC	50-2321/2463	========/======	39/77	90.74	70.33	vfdb	NP_463763	(clpC) endopeptidase Clp ATP-binding chain C [ClpC (VF0072)] [Listeria monocytogenes EGD-e]
SR40_H3.C7a.fasta	NODE_7_length_136025_cov_212.806007	26270	26832	+	clpP	1-563/597	===============	0/0	94.30	75.49	vfdb	NP_465991	(clpP) ATP-dependent Clp protease proteolytic subunit [ClpP (VF0074)] [Listeria monocytogenes EGD-e]
SR41_H3.C7b.fasta	NODE_7_length_135925_cov_192.981251	109094	109656	-	clpP	1-563/597	===============	0/0	94.30	75.49	vfdb	NP_465991	(clpP) ATP-dependent Clp protease proteolytic subunit [ClpP (VF0074)] [Listeria monocytogenes EGD-e]
SR41_H3.C7b.fasta	NODE_9_length_92899_cov_218.480974	8855	11129	+	clpC	50-2321/2463	========/======	39/77	90.74	70.33	vfdb	NP_463763	(clpC) endopeptidase Clp ATP-binding chain C [ClpC (VF0072)] [Listeria monocytogenes EGD-e]
SR42_H3.C8a.fasta	NODE_10_length_92902_cov_230.839763	8855	11129	+	clpC	50-2321/2463	========/======	39/77	90.74	70.33	vfdb	NP_463763	(clpC) endopeptidase Clp ATP-binding chain C [ClpC (VF0072)] [Listeria monocytogenes EGD-e]
SR42_H3.C8a.fasta	NODE_7_length_136025_cov_208.440058	26270	26832	+	clpP	1-563/597	===============	0/0	94.30	75.49	vfdb	NP_465991	(clpP) ATP-dependent Clp protease proteolytic subunit [ClpP (VF0074)] [Listeria monocytogenes EGD-e]
SR43_H3.C8b.fasta	NODE_7_length_135925_cov_195.443437	26270	26832	+	clpP	1-563/597	===============	0/0	94.30	75.49	vfdb	NP_465991	(clpP) ATP-dependent Clp protease proteolytic subunit [ClpP (VF0074)] [Listeria monocytogenes EGD-e]
SR43_H3.C8b.fasta	NODE_9_length_92999_cov_216.666968	8855	11129	+	clpC	50-2321/2463	========/======	39/77	90.74	70.33	vfdb	NP_463763	(clpC) endopeptidase Clp ATP-binding chain C [ClpC (VF0072)] [Listeria monocytogenes EGD-e]
SR44_H3.C9a.fasta	NODE_7_length_135925_cov_226.449149	26270	26832	+	clpP	1-563/597	===============	0/0	94.30	75.49	vfdb	NP_465991	(clpP) ATP-dependent Clp protease proteolytic subunit [ClpP (VF0074)] [Listeria monocytogenes EGD-e]
SR44_H3.C9a.fasta	NODE_9_length_92899_cov_244.868479	8855	11129	+	clpC	50-2321/2463	========/======	39/77	90.74	70.33	vfdb	NP_463763	(clpC) endopeptidase Clp ATP-binding chain C [ClpC (VF0072)] [Listeria monocytogenes EGD-e]
SR45_H3.C9b.fasta	NODE_7_length_135925_cov_211.603903	109094	109656	-	clpP	1-563/597	===============	0/0	94.30	75.49	vfdb	NP_465991	(clpP) ATP-dependent Clp protease proteolytic subunit [ClpP (VF0074)] [Listeria monocytogenes EGD-e]
SR45_H3.C9b.fasta	NODE_9_length_92899_cov_224.248637	8855	11129	+	clpC	50-2321/2463	========/======	39/77	90.74	70.33	vfdb	NP_463763	(clpC) endopeptidase Clp ATP-binding chain C [ClpC (VF0072)] [Listeria monocytogenes EGD-e]
SR46_H3.C10a.fasta	NODE_10_length_92999_cov_276.418986	8855	11129	+	clpC	50-2321/2463	========/======	39/77	90.74	70.33	vfdb	NP_463763	(clpC) endopeptidase Clp ATP-binding chain C [ClpC (VF0072)] [Listeria monocytogenes EGD-e]
SR46_H3.C10a.fasta	NODE_7_length_136025_cov_241.710441	109194	109756	-	clpP	1-563/597	===============	0/0	94.30	75.49	vfdb	NP_465991	(clpP) ATP-dependent Clp protease proteolytic subunit [ClpP (VF0074)] [Listeria monocytogenes EGD-e]
SR47_H3.C10b.fasta	NODE_7_length_135924_cov_235.900601	26270	26832	+	clpP	1-563/597	===============	0/0	94.30	75.49	vfdb	NP_465991	(clpP) ATP-dependent Clp protease proteolytic subunit [ClpP (VF0074)] [Listeria monocytogenes EGD-e]
SR47_H3.C10b.fasta	NODE_9_length_92899_cov_267.881030	8855	11129	+	clpC	50-2321/2463	========/======	39/77	90.74	70.33	vfdb	NP_463763	(clpC) endopeptidase Clp ATP-binding chain C [ClpC (VF0072)] [Listeria monocytogenes EGD-e]
SR48_H3.C11a.fasta	NODE_4_length_200859_cov_171.168630	109194	109756	-	clpP	1-563/597	===============	0/0	94.30	75.49	vfdb	NP_465991	(clpP) ATP-dependent Clp protease proteolytic subunit [ClpP (VF0074)] [Listeria monocytogenes EGD-e]
SR48_H3.C11a.fasta	NODE_8_length_92902_cov_180.891861	8855	11129	+	clpC	50-2321/2463	========/======	39/77	90.74	70.33	vfdb	NP_463763	(clpC) endopeptidase Clp ATP-binding chain C [ClpC (VF0072)] [Listeria monocytogenes EGD-e]
SR49_H3.C11b.fasta	NODE_7_length_135925_cov_226.833873	109094	109656	-	clpP	1-563/597	===============	0/0	94.30	75.49	vfdb	NP_465991	(clpP) ATP-dependent Clp protease proteolytic subunit [ClpP (VF0074)] [Listeria monocytogenes EGD-e]
SR49_H3.C11b.fasta	NODE_9_length_92902_cov_249.277684	8855	11129	+	clpC	50-2321/2463	========/======	39/77	90.74	70.33	vfdb	NP_463763	(clpC) endopeptidase Clp ATP-binding chain C [ClpC (VF0072)] [Listeria monocytogenes EGD-e]
SR50_H3.C12.fasta	NODE_7_length_136025_cov_226.837335	109194	109756	-	clpP	1-563/597	===============	0/0	94.30	75.49	vfdb	NP_465991	(clpP) ATP-dependent Clp protease proteolytic subunit [ClpP (VF0074)] [Listeria monocytogenes EGD-e]
SR50_H3.C12.fasta	NODE_9_length_92902_cov_243.701901	8855	11129	+	clpC	50-2321/2463	========/======	39/77	90.74	70.33	vfdb	NP_463763	(clpC) endopeptidase Clp ATP-binding chain C [ClpC (VF0072)] [Listeria monocytogenes EGD-e]
SR51_H3.C13.fasta	NODE_4_length_200034_cov_203.948584	109094	109656	-	clpP	1-563/597	===============	0/0	94.30	75.49	vfdb	NP_465991	(clpP) ATP-dependent Clp protease proteolytic subunit [ClpP (VF0074)] [Listeria monocytogenes EGD-e]
SR51_H3.C13.fasta	NODE_8_length_92999_cov_218.172209	8855	11129	+	clpC	50-2321/2463	========/======	39/77	90.74	70.33	vfdb	NP_463763	(clpC) endopeptidase Clp ATP-binding chain C [ClpC (VF0072)] [Listeria monocytogenes EGD-e]
SR52_H4.C1.fasta	NODE_5_length_176306_cov_213.969001	164980	167254	-	clpC	50-2321/2463	========/======	39/77	90.74	70.33	vfdb	NP_463763	(clpC) endopeptidase Clp ATP-binding chain C [ClpC (VF0072)] [Listeria monocytogenes EGD-e]
SR52_H4.C1.fasta	NODE_7_length_138165_cov_215.036252	109093	109655	-	clpP	1-563/597	===============	0/0	94.30	75.49	vfdb	NP_465991	(clpP) ATP-dependent Clp protease proteolytic subunit [ClpP (VF0074)] [Listeria monocytogenes EGD-e]
SR53_H5.C1.fasta	NODE_2_length_200296_cov_266.073100	109093	109655	-	clpP	1-563/597	===============	0/0	94.30	75.49	vfdb	NP_465991	(clpP) ATP-dependent Clp protease proteolytic subunit [ClpP (VF0074)] [Listeria monocytogenes EGD-e]
SR53_H5.C1.fasta	NODE_6_length_176203_cov_281.773316	9046	11320	+	clpC	50-2321/2463	========/======	39/77	90.74	70.33	vfdb	NP_463763	(clpC) endopeptidase Clp ATP-binding chain C [ClpC (VF0072)] [Listeria monocytogenes EGD-e]
SR54_H5.C2.fasta	NODE_2_length_200616_cov_243.835548	109093	109655	-	clpP	1-563/597	===============	0/0	94.30	75.49	vfdb	NP_465991	(clpP) ATP-dependent Clp protease proteolytic subunit [ClpP (VF0074)] [Listeria monocytogenes EGD-e]
SR54_H5.C2.fasta	NODE_6_length_176303_cov_254.025638	9046	11320	+	clpC	50-2321/2463	========/======	39/77	90.74	70.33	vfdb	NP_463763	(clpC) endopeptidase Clp ATP-binding chain C [ClpC (VF0072)] [Listeria monocytogenes EGD-e]
SR55_H6.C1a.fasta	NODE_3_length_199544_cov_276.303835	89790	90352	+	clpP	1-563/597	===============	0/0	94.30	75.49	vfdb	NP_465991	(clpP) ATP-dependent Clp protease proteolytic subunit [ClpP (VF0074)] [Listeria monocytogenes EGD-e]
SR55_H6.C1a.fasta	NODE_5_length_176024_cov_283.491847	8861	11135	+	clpC	50-2321/2463	========/======	39/77	90.74	70.33	vfdb	NP_463763	(clpC) endopeptidase Clp ATP-binding chain C [ClpC (VF0072)] [Listeria monocytogenes EGD-e]
SR56_H6.C1b.fasta	NODE_3_length_199544_cov_222.225366	89790	90352	+	clpP	1-563/597	===============	0/0	94.30	75.49	vfdb	NP_465991	(clpP) ATP-dependent Clp protease proteolytic subunit [ClpP (VF0074)] [Listeria monocytogenes EGD-e]
SR56_H6.C1b.fasta	NODE_4_length_176024_cov_227.393687	8861	11135	+	clpC	50-2321/2463	========/======	39/77	90.74	70.33	vfdb	NP_463763	(clpC) endopeptidase Clp ATP-binding chain C [ClpC (VF0072)] [Listeria monocytogenes EGD-e]
SR57_H6.C1c.fasta	NODE_3_length_199444_cov_225.841689	109093	109655	-	clpP	1-563/597	===============	0/0	94.30	75.49	vfdb	NP_465991	(clpP) ATP-dependent Clp protease proteolytic subunit [ClpP (VF0074)] [Listeria monocytogenes EGD-e]
SR57_H6.C1c.fasta	NODE_5_length_176024_cov_233.041672	8861	11135	+	clpC	50-2321/2463	========/======	39/77	90.74	70.33	vfdb	NP_463763	(clpC) endopeptidase Clp ATP-binding chain C [ClpC (VF0072)] [Listeria monocytogenes EGD-e]
SR58_H6.C2a.fasta	NODE_3_length_199444_cov_200.906645	89790	90352	+	clpP	1-563/597	===============	0/0	94.30	75.49	vfdb	NP_465991	(clpP) ATP-dependent Clp protease proteolytic subunit [ClpP (VF0074)] [Listeria monocytogenes EGD-e]
SR58_H6.C2a.fasta	NODE_5_length_176024_cov_208.694328	8861	11135	+	clpC	50-2321/2463	========/======	39/77	90.74	70.33	vfdb	NP_463763	(clpC) endopeptidase Clp ATP-binding chain C [ClpC (VF0072)] [Listeria monocytogenes EGD-e]
SR59_H6.C2b.fasta	NODE_3_length_199444_cov_229.307257	89790	90352	+	clpP	1-563/597	===============	0/0	94.30	75.49	vfdb	NP_465991	(clpP) ATP-dependent Clp protease proteolytic subunit [ClpP (VF0074)] [Listeria monocytogenes EGD-e]
SR59_H6.C2b.fasta	NODE_5_length_176124_cov_235.847836	164990	167264	-	clpC	50-2321/2463	========/======	39/77	90.74	70.33	vfdb	NP_463763	(clpC) endopeptidase Clp ATP-binding chain C [ClpC (VF0072)] [Listeria monocytogenes EGD-e]
SR60_H6.C3.fasta	NODE_3_length_199444_cov_211.004860	109093	109655	-	clpP	1-563/597	===============	0/0	94.30	75.49	vfdb	NP_465991	(clpP) ATP-dependent Clp protease proteolytic subunit [ClpP (VF0074)] [Listeria monocytogenes EGD-e]
SR60_H6.C3.fasta	NODE_5_length_176024_cov_216.450528	164890	167164	-	clpC	50-2321/2463	========/======	39/77	90.74	70.33	vfdb	NP_463763	(clpC) endopeptidase Clp ATP-binding chain C [ClpC (VF0072)] [Listeria monocytogenes EGD-e]
SR61_H6.C4.fasta	NODE_3_length_199444_cov_255.048438	89790	90352	+	clpP	1-563/597	===============	0/0	94.30	75.49	vfdb	NP_465991	(clpP) ATP-dependent Clp protease proteolytic subunit [ClpP (VF0074)] [Listeria monocytogenes EGD-e]
SR61_H6.C4.fasta	NODE_5_length_176024_cov_262.533433	8861	11135	+	clpC	50-2321/2463	========/======	39/77	90.74	70.33	vfdb	NP_463763	(clpC) endopeptidase Clp ATP-binding chain C [ClpC (VF0072)] [Listeria monocytogenes EGD-e]
SR62_H6.C5.fasta	NODE_3_length_199444_cov_214.036039	109093	109655	-	clpP	1-563/597	===============	0/0	94.30	75.49	vfdb	NP_465991	(clpP) ATP-dependent Clp protease proteolytic subunit [ClpP (VF0074)] [Listeria monocytogenes EGD-e]
SR62_H6.C5.fasta	NODE_5_length_176024_cov_221.128300	8861	11135	+	clpC	50-2321/2463	========/======	39/77	90.74	70.33	vfdb	NP_463763	(clpC) endopeptidase Clp ATP-binding chain C [ClpC (VF0072)] [Listeria monocytogenes EGD-e]
SR63_H6.C6.fasta	NODE_3_length_199444_cov_237.084693	89790	90352	+	clpP	1-563/597	===============	0/0	94.30	75.49	vfdb	NP_465991	(clpP) ATP-dependent Clp protease proteolytic subunit [ClpP (VF0074)] [Listeria monocytogenes EGD-e]
SR63_H6.C6.fasta	NODE_5_length_176024_cov_243.986598	8861	11135	+	clpC	50-2321/2463	========/======	39/77	90.74	70.33	vfdb	NP_463763	(clpC) endopeptidase Clp ATP-binding chain C [ClpC (VF0072)] [Listeria monocytogenes EGD-e]
SR64_H6.C7a.fasta	NODE_3_length_199545_cov_229.641897	89791	90353	+	clpP	1-563/597	===============	0/0	94.30	75.49	vfdb	NP_465991	(clpP) ATP-dependent Clp protease proteolytic subunit [ClpP (VF0074)] [Listeria monocytogenes EGD-e]
SR64_H6.C7a.fasta	NODE_5_length_176124_cov_235.778264	8861	11135	+	clpC	50-2321/2463	========/======	39/77	90.74	70.33	vfdb	NP_463763	(clpC) endopeptidase Clp ATP-binding chain C [ClpC (VF0072)] [Listeria monocytogenes EGD-e]
SR65_H6.C7b.fasta	NODE_3_length_199426_cov_275.750673	109093	109655	-	clpP	1-563/597	===============	0/0	94.30	75.49	vfdb	NP_465991	(clpP) ATP-dependent Clp protease proteolytic subunit [ClpP (VF0074)] [Listeria monocytogenes EGD-e]
SR65_H6.C7b.fasta	NODE_5_length_176124_cov_284.179674	8861	11135	+	clpC	50-2321/2463	========/======	39/77	90.74	70.33	vfdb	NP_463763	(clpC) endopeptidase Clp ATP-binding chain C [ClpC (VF0072)] [Listeria monocytogenes EGD-e]
SR66_H6.C8a.fasta	NODE_3_length_199444_cov_233.203178	89790	90352	+	clpP	1-563/597	===============	0/0	94.30	75.49	vfdb	NP_465991	(clpP) ATP-dependent Clp protease proteolytic subunit [ClpP (VF0074)] [Listeria monocytogenes EGD-e]
SR66_H6.C8a.fasta	NODE_5_length_176024_cov_243.638431	8861	11135	+	clpC	50-2321/2463	========/======	39/77	90.74	70.33	vfdb	NP_463763	(clpC) endopeptidase Clp ATP-binding chain C [ClpC (VF0072)] [Listeria monocytogenes EGD-e]
SR67_H6.C8b.fasta	NODE_3_length_199444_cov_246.729042	109093	109655	-	clpP	1-563/597	===============	0/0	94.30	75.49	vfdb	NP_465991	(clpP) ATP-dependent Clp protease proteolytic subunit [ClpP (VF0074)] [Listeria monocytogenes EGD-e]
SR67_H6.C8b.fasta	NODE_5_length_176024_cov_260.826624	8861	11135	+	clpC	50-2321/2463	========/======	39/77	90.74	70.33	vfdb	NP_463763	(clpC) endopeptidase Clp ATP-binding chain C [ClpC (VF0072)] [Listeria monocytogenes EGD-e]
SR68_H6.C8c.fasta	NODE_3_length_199544_cov_215.622469	89790	90352	+	clpP	1-563/597	===============	0/0	94.30	75.49	vfdb	NP_465991	(clpP) ATP-dependent Clp protease proteolytic subunit [ClpP (VF0074)] [Listeria monocytogenes EGD-e]
SR68_H6.C8c.fasta	NODE_5_length_176024_cov_227.432181	164890	167164	-	clpC	50-2321/2463	========/======	39/77	90.74	70.33	vfdb	NP_463763	(clpC) endopeptidase Clp ATP-binding chain C [ClpC (VF0072)] [Listeria monocytogenes EGD-e]
SR69_H7.C1.fasta	NODE_3_length_176351_cov_300.741170	9174	11448	+	clpC	50-2321/2463	========/======	39/77	90.74	70.33	vfdb	NP_463763	(clpC) endopeptidase Clp ATP-binding chain C [ClpC (VF0072)] [Listeria monocytogenes EGD-e]
SR69_H7.C1.fasta	NODE_6_length_133936_cov_287.975960	90711	91273	+	clpP	1-563/597	===============	0/0	94.30	75.49	vfdb	NP_465991	(clpP) ATP-dependent Clp protease proteolytic subunit [ClpP (VF0074)] [Listeria monocytogenes EGD-e]
SR70_H7.C2.fasta	NODE_3_length_176252_cov_233.545838	164805	167079	-	clpC	50-2321/2463	========/======	39/77	90.74	70.33	vfdb	NP_463763	(clpC) endopeptidase Clp ATP-binding chain C [ClpC (VF0072)] [Listeria monocytogenes EGD-e]
SR70_H7.C2.fasta	NODE_4_length_175121_cov_239.441112	42664	43226	-	clpP	1-563/597	===============	0/0	94.30	75.49	vfdb	NP_465991	(clpP) ATP-dependent Clp protease proteolytic subunit [ClpP (VF0074)] [Listeria monocytogenes EGD-e]
SR71_H8.C1.fasta	NODE_4_length_176020_cov_248.457392	8861	11135	+	clpC	50-2321/2463	========/======	39/77	90.74	70.33	vfdb	NP_463763	(clpC) endopeptidase Clp ATP-binding chain C [ClpC (VF0072)] [Listeria monocytogenes EGD-e]
SR71_H8.C1.fasta	NODE_8_length_132444_cov_260.669313	107347	107909	-	clpP	1-563/597	===============	0/0	94.30	75.49	vfdb	NP_465991	(clpP) ATP-dependent Clp protease proteolytic subunit [ClpP (VF0074)] [Listeria monocytogenes EGD-e]
SR72_H8.C2.fasta	NODE_4_length_176120_cov_197.040609	8861	11135	+	clpC	50-2321/2463	========/======	39/77	90.74	70.33	vfdb	NP_463763	(clpC) endopeptidase Clp ATP-binding chain C [ClpC (VF0072)] [Listeria monocytogenes EGD-e]
SR72_H8.C2.fasta	NODE_8_length_132187_cov_194.218265	107447	108009	-	clpP	1-563/597	===============	0/0	94.30	75.49	vfdb	NP_465991	(clpP) ATP-dependent Clp protease proteolytic subunit [ClpP (VF0074)] [Listeria monocytogenes EGD-e]
SR73_H8.C3a.fasta	NODE_4_length_176020_cov_278.192596	164886	167160	-	clpC	50-2321/2463	========/======	39/77	90.74	70.33	vfdb	NP_463763	(clpC) endopeptidase Clp ATP-binding chain C [ClpC (VF0072)] [Listeria monocytogenes EGD-e]
SR73_H8.C3a.fasta	NODE_8_length_132087_cov_289.593493	107347	107909	-	clpP	1-563/597	===============	0/0	94.30	75.49	vfdb	NP_465991	(clpP) ATP-dependent Clp protease proteolytic subunit [ClpP (VF0074)] [Listeria monocytogenes EGD-e]
SR74_H8.C3b.fasta	NODE_4_length_176020_cov_238.760252	8861	11135	+	clpC	50-2321/2463	========/======	39/77	90.74	70.33	vfdb	NP_463763	(clpC) endopeptidase Clp ATP-binding chain C [ClpC (VF0072)] [Listeria monocytogenes EGD-e]
SR74_H8.C3b.fasta	NODE_8_length_132187_cov_240.135221	107447	108009	-	clpP	1-563/597	===============	0/0	94.30	75.49	vfdb	NP_465991	(clpP) ATP-dependent Clp protease proteolytic subunit [ClpP (VF0074)] [Listeria monocytogenes EGD-e]
SR75_H8.C4.fasta	NODE_5_length_176120_cov_247.499435	8861	11135	+	clpC	50-2321/2463	========/======	39/77	90.74	70.33	vfdb	NP_463763	(clpC) endopeptidase Clp ATP-binding chain C [ClpC (VF0072)] [Listeria monocytogenes EGD-e]
SR75_H8.C4.fasta	NODE_8_length_132087_cov_254.067972	107347	107909	-	clpP	1-563/597	===============	0/0	94.30	75.49	vfdb	NP_465991	(clpP) ATP-dependent Clp protease proteolytic subunit [ClpP (VF0074)] [Listeria monocytogenes EGD-e]
SR76_H8.C5.fasta	NODE_4_length_176120_cov_210.199616	8861	11135	+	clpC	50-2321/2463	========/======	39/77	90.74	70.33	vfdb	NP_463763	(clpC) endopeptidase Clp ATP-binding chain C [ClpC (VF0072)] [Listeria monocytogenes EGD-e]
SR76_H8.C5.fasta	NODE_8_length_132087_cov_220.673502	107347	107909	-	clpP	1-563/597	===============	0/0	94.30	75.49	vfdb	NP_465991	(clpP) ATP-dependent Clp protease proteolytic subunit [ClpP (VF0074)] [Listeria monocytogenes EGD-e]
SR77_H8.C6.fasta	NODE_5_length_174778_cov_203.361658	8861	11135	+	clpC	50-2321/2463	========/======	39/77	90.74	70.33	vfdb	NP_463763	(clpC) endopeptidase Clp ATP-binding chain C [ClpC (VF0072)] [Listeria monocytogenes EGD-e]
SR77_H8.C6.fasta	NODE_8_length_102116_cov_209.297955	75278	75840	-	clpP	1-563/597	===============	0/0	94.30	75.49	vfdb	NP_465991	(clpP) ATP-dependent Clp protease proteolytic subunit [ClpP (VF0074)] [Listeria monocytogenes EGD-e]
SR78_H8.C7a.fasta	NODE_4_length_176020_cov_271.568843	8861	11135	+	clpC	50-2321/2463	========/======	39/77	90.74	70.33	vfdb	NP_463763	(clpC) endopeptidase Clp ATP-binding chain C [ClpC (VF0072)] [Listeria monocytogenes EGD-e]
SR78_H8.C7a.fasta	NODE_8_length_132087_cov_274.034937	107347	107909	-	clpP	1-563/597	===============	0/0	94.30	75.49	vfdb	NP_465991	(clpP) ATP-dependent Clp protease proteolytic subunit [ClpP (VF0074)] [Listeria monocytogenes EGD-e]
SR79_H8.C7b.fasta	NODE_4_length_174801_cov_217.037659	8884	11158	+	clpC	50-2321/2463	========/======	39/77	90.74	70.33	vfdb	NP_463763	(clpC) endopeptidase Clp ATP-binding chain C [ClpC (VF0072)] [Listeria monocytogenes EGD-e]
SR79_H8.C7b.fasta	NODE_7_length_102116_cov_213.695254	75278	75840	-	clpP	1-563/597	===============	0/0	94.30	75.49	vfdb	NP_465991	(clpP) ATP-dependent Clp protease proteolytic subunit [ClpP (VF0074)] [Listeria monocytogenes EGD-e]
SR80_H8.C8.fasta	NODE_5_length_198037_cov_222.487023	107447	108009	-	clpP	1-563/597	===============	0/0	94.30	75.49	vfdb	NP_465991	(clpP) ATP-dependent Clp protease proteolytic subunit [ClpP (VF0074)] [Listeria monocytogenes EGD-e]
SR80_H8.C8.fasta	NODE_6_length_176020_cov_232.434402	8861	11135	+	clpC	50-2321/2463	========/======	39/77	90.74	70.33	vfdb	NP_463763	(clpC) endopeptidase Clp ATP-binding chain C [ClpC (VF0072)] [Listeria monocytogenes EGD-e]
SR81_H9.C1.fasta	NODE_10_length_80743_cov_191.305544	982	1544	+	clpP	1-563/597	===============	0/0	94.30	75.49	vfdb	NP_465991	(clpP) ATP-dependent Clp protease proteolytic subunit [ClpP (VF0074)] [Listeria monocytogenes EGD-e]
SR81_H9.C1.fasta	NODE_5_length_176019_cov_210.411215	8861	11135	+	clpC	50-2321/2463	========/======	39/77	90.74	70.28	vfdb	NP_463763	(clpC) endopeptidase Clp ATP-binding chain C [ClpC (VF0072)] [Listeria monocytogenes EGD-e]

## Sheet: Resistance genes
#FILE	SEQUENCE	START	END	STRAND	GENE	COVERAGE	COVERAGE_MAP	GAPS	%COVERAGE	%IDENTITY	DATABASE	ACCESSION	PRODUCT	RESISTANCE
SR51_H3.C13.fasta	NODE_23_length_4585_cov_873.142192	1555	2403	-	str_1	1-849/849	===============	0/0	100.00	99.76	resfinder	X92946	str	Streptomycin
SR54_H5.C2.fasta	NODE_23_length_2559_cov_1005.519339	1250	1735	+	lnu(A)_1	1-486/486	===============	0/0	100.00	99.18	resfinder	M14039	lnu(A)	Lincomycin
SR77_H8.C6.fasta	NODE_30_length_2638_cov_870.616166	336	821	-	lnu(A)_1	1-486/486	===============	0/0	100.00	98.97	resfinder	M14039	lnu(A)	Lincomycin

## Sheet: Plasmid genes
#FILE	SEQUENCE	START	END	STRAND	GENE	COVERAGE	COVERAGE_MAP	GAPS	%COVERAGE	%IDENTITY	DATABASE	ACCESSION	PRODUCT	RESISTANCE
SR51_H3.C13.fasta	NODE_23_length_4585_cov_873.142192	2411	3259	-	rep7a_4_repD(pK214)	1-849/849	===============	0/0	100.00	99.53	plasmidfinder	NC009751	rep7a_4_repD(pK214)_NC009751
SR54_H5.C2.fasta	NODE_22_length_4704_cov_2570.201210	3028	3514	+	rep10_3_pNE131p1(pNE131)	1-489/489	========/======	2023-02-01	99.59	96.73	plasmidfinder	NC001390	rep10_3_pNE131p1(pNE131)_NC001390
SR54_H5.C2.fasta	NODE_23_length_2559_cov_1005.519339	63	908	-	rep13_7_rep(pLNU9)	1-846/846	===============	0/0	100.00	96.93	plasmidfinder	AM399082	rep13_7_rep(pLNU9)_AM399082
SR77_H8.C6.fasta	NODE_30_length_2638_cov_870.616166	1040	2044	+	rep21_27_rep(pLNU4)	1-1005/1005	===============	0/0	100.00	100.00	plasmidfinder	AM184102	rep21_27_rep(pLNU4)_AM184102
S.rostri_DSM21968_GCF_002902145.fna	NZ_PPRF01000029.1	667	1512	-	rep13_7_rep(pLNU9)	1-846/846	===============	0/0	100.00	96.81	plasmidfinder	AM399082	rep13_7_rep(pLNU9)_AM399082
